# Supplementary material for: Stereoselective formal alkenylation of β,β-disubstituted enesulfinamides for constructing 1,5- and 1,4-dicarbonyl derivatives bearing less-accessible acyclic α-quaternary stereocenters
Source: Royal Society of Chemistry journal article supplement (doi:10.1039/d3qo01381b), 2023-01-01
Supplement: d3qo01381b1.pdf [file d3qo01381b1.pdf]

## Stereoselective Formal Alkenylation of $\beta$ , $\beta$ -Disubstituted Enesulfinamides for Constructing 1,5- and 1,4-Dicarbonyl Derivatives Bearing Less-Accessible $\alpha$ -Acyclic Quaternary Stereocenters

Chong-Lin Zhu<sup>†,‡</sup> and Chong-Dao Lu<sup>\*,†,‡</sup>

<sup>†</sup>School of Chemical Science and Technology, Yunnan University, Kunming, Yunnan 650091, China

<sup>‡</sup>Southwest United Graduate School, Kunming, Yunnan 650092, China

### Table of Contents

|                                                                                                                        |      |
|------------------------------------------------------------------------------------------------------------------------|------|
| General Experimental Information.....                                                                                  | S2   |
| Procedure for the preparation of ketones <b>S1–S4</b> .....                                                            | S3   |
| Procedure for the synthesis of $\alpha$ -substituted $\alpha$ , $\beta$ -unsaturated <i>N</i> -sulfinyl ketimines..... | S5   |
| Procedure for the synthesis of unknown enesulfinamides.....                                                            | S6   |
| Procedure for the preparation of $\beta$ -nitroenones with modified elimination conditions .....                       | S10  |
| Procedure for the preparation of $\beta$ -sulfonyl acrylonitriles <b>4a</b> and <b>4b</b> .....                        | S13  |
| General procedure A for synthesis of 1,5-dicarbonyl analogs using $\beta$ -nitroenone <b>2</b> .....                   | S14  |
| General procedure B for synthesis of 1,5-dicarbonyl analogs using $\beta$ -nitroenone <b>2</b> .....                   | S14  |
| Gram scale preparation of ( <i>R</i> , <i>R</i> )- <b>3a</b> .....                                                     | S15  |
| General procedure C for synthesis of 1,4-dicarbonyl analogs using $\beta$ -sulfonyl acrylonitrile <b>4a</b> .....      | S36  |
| General procedure D for synthesis of 1,4-dicarbonyl analogs using $\beta$ -sulfonyl acrylonitrile <b>4b</b> .....      | S36  |
| Gram scale preparation of ( <i>R</i> , <i>R</i> )- <b>5a</b> .....                                                     | S37  |
| References.....                                                                                                        | S54  |
| <sup>1</sup> H and <sup>13</sup> C NMR spectra for all new compounds.....                                              | S55  |
| Determination of dr by <sup>1</sup> H NMR or HPLC analysis of the crude products .....                                 | S146 |
| X-Ray crystal structure of the compound <b>3z</b> .....                                                                | S225 |
| X-Ray crystal structure of the compound ( <i>R</i> , <i>S</i> )- <b>5a</b> .....                                       | S229 |

## General Experimental Information

All reactions were performed under a positive pressure of argon atmosphere in flame-dried glassware with magnetic stirring using standard Schlenk techniques. All solvents were dried and distilled before use. Column chromatography was performed using 100–200 mesh silica gel. Visualization on TLC (thin layer chromatography) was achieved by the use of UV light (254 nm) and treatment with aqueous ceric ammonium molybdate staining followed by heating. The melting point (m.p.) values were measured using a Buchi melting point apparatus M-560 and are uncorrected. High-resolution mass spectra (HRMS) were measured using electron spray ionization with a LTQ-Orbitrap mass analyzer (ESI-Orbitrap) or with a Q-TOF mass analyzer (ESI-TOF). SuperNova, Dual, Cu at zero, AtlasS2 diffractometer using Mo K $\alpha$ . Optical rotations were measured on an Autopol IV (Rudolph Research Analytical).

Proton and carbon magnetic resonance spectra ( $^1\text{H}$  NMR and  $^{13}\text{C}\{^1\text{H}\}$  NMR) were recorded on a 400 MHz ( $^1\text{H}$  NMR at 400 MHz and  $^{13}\text{C}\{^1\text{H}\}$  NMR at 100 MHz) spectrometer with solvent resonance as the internal standard ( $^1\text{H}$  NMR,  $\text{CDCl}_3$  at 7.26 ppm,  $\text{C}_6\text{D}_6$  at 7.16 ppm;  $^{13}\text{C}\{^1\text{H}\}$  NMR,  $\text{CDCl}_3$  at 77.16 ppm,  $\text{C}_6\text{D}_6$  at 128.06 ppm).  $^1\text{H}$  NMR data are reported as follows: chemical shifts, multiplicity (s = singlet, d = doublet, t = triplet, q = quadruplet, dd = doublet doublet, m = multiplet), coupling constant(s) in Hz, and integration. Diastomeric ratio (dr) was determined by  $^1\text{H}$  NMR analysis or HPLC analysis [a UV-visible detector using chiral stationary columns (0.46 cm  $\times$  25 cm) from Daicel] of crude reaction mixture.

**Materials:** Tetrahydrofuran (THF) was freshly distilled from sodium/benzophenone ketyl. Dichloromethane was distilled from  $\text{CaH}_2$ . All commercially available reagents were used without further purification unless otherwise noted. The chemicals of *t*BuOK (1.0 M in THF) used in this study was manufactured by Adamas. The  $\alpha$ -substituted  $\alpha,\beta$ -unsaturated *N*-sulfinyl ketimines **S5** and **S6** in this study were new compounds and prepared according to our previously reported procedures.<sup>S1,S2</sup> All of the *N-tert*-butanesulfinyl enesulfinamides used in this study were known compounds [except (*Ss*, *E*)-**1a**, (*Rs*, *E*)-**1n**, **1x** and **1y**] and prepared according to our previously reported procedures.<sup>S2</sup>  $\beta$ -Nitroenones **2a–2g** were known compounds, but the yields for the step of elimination ( $\text{MsCl}$ ,  $\text{Et}_3\text{N}$ ) are relatively low ( $\leq 44\%$ ).<sup>S3</sup> We have modified the reported elimination procedure and the new method ( $\text{Tf}_2\text{O}$ ,  $\text{Et}_3\text{N}$ ) gave much higher yield of the desired products.  $\beta$ -Nitroenones **2h–2i** were prepared according reported procedures.<sup>S3</sup> (*E*)- $\beta$ -tosyl acrylonitrile **4a** were known compounds and prepared according the reported procedures.<sup>S4</sup> (*E*)-3-((3,5-bis(trifluoromethyl)phenyl)sulfonyl)acrylonitrile **4b** were prepared according the reported procedures.<sup>S4</sup>

## Procedure for the preparation of ketones S1–S4

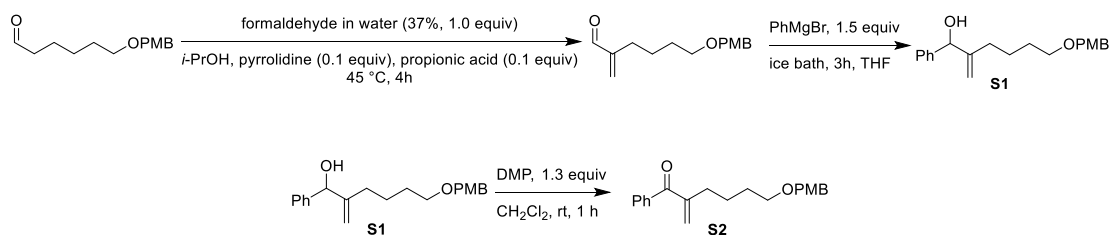

To a mixture of aqueous formaldehyde solution (37% formaldehyde in water, 0.30 mL, 4.07 mmol, 1.0 equiv) and aldehyde<sup>S5</sup> (962.0 mg, 4.07 mmol, 1.0 equiv) in *i*-PrOH (0.4 mL) were added propionic acid (31  $\mu$ L, 0.41 mmol, 0.1 equiv) and pyrrolidine (31  $\mu$ L, 0.41 mmol, 0.1 equiv). After stirring at 45 °C for 4 h, the reaction mixture was quenched with NaHCO<sub>3</sub> (10 mL, sat. aq.) and extracted with CH<sub>2</sub>Cl<sub>2</sub> (20 mL $\times$ 3). The combined organic extracts were dried over anhydrous sodium sulfate, filtered, and concentrated under reduced pressure. The residue was purified by silica gel column chromatography (3-5% ethyl acetate/petroleum ether) to afford the  $\alpha$ -methylene aldehyde.

To a solution of 6-((4-methoxybenzyl)oxy)-2-methylenehexanal (0.55 g, 2.263 mmol, 1.0 equiv) in freshly distilled THF (10 mL) at 0 °C was added phenylmagnesium bromide (1 M, 3.40 mL, 3.395 mmol, 1.5 equiv) dropwise under argon atmosphere. After the aldehyde was consumed completely, saturated aqueous ammonium chloride (20 mL) was added carefully and the mixture was extracted with ethyl acetate (30 mL $\times$ 3). The combined organic extracts were washed with brine, dried over anhydrous sodium sulfate, filtered, and concentrated under reduced pressure. The residue was purified by silica gel column chromatography (30% ethyl acetate/petroleum ether) to give **S1** as a colorless oil (0.636 g, 88% yield). Analytical data for **S1**:  $R_f$  = 0.30 (petroleum ether/ethyl acetate = 4/1); <sup>1</sup>H NMR (400 MHz, CDCl<sub>3</sub>)  $\delta$  7.27–7.12 (m, 7H), 6.81–6.76 (m, 2H), 5.19–5.16 (m, 1H), 5.05 (s, 1H), 4.91–4.86 (m, 1H), 4.31 (s, 2H), 3.71 (s, 3H), 3.29 (t,  $J$  = 6.2 Hz, 2H), 2.02–1.67 (m, 3H), 1.52–1.31 (m, 4H); <sup>13</sup>C {<sup>1</sup>H} NMR (100 MHz, CDCl<sub>3</sub>)  $\delta$  159.2, 150.9, 142.3, 130.8, 129.4, 128.5, 127.8, 126.8, 113.9, 110.1, 77.4, 72.6, 70.0, 55.4, 31.6, 29.5, 24.5; HRMS (ESI-Orbitrap)  $m/z$ : [M + H]<sup>+</sup> Calcd for C<sub>21</sub>H<sub>27</sub>O<sub>3</sub> 327.1955; Found 327.1954.

The alcohol **S1** (0.570 g, 1.745 mmol, 1.0 equiv) obtained above was dissolved in CH<sub>2</sub>Cl<sub>2</sub> (10 mL) and DMP (0.962 g, 2.268 mmol, 1.3 equiv) was added portionwise. After stirring for 1 h, the mixture was diluted with CH<sub>2</sub>Cl<sub>2</sub> (10 mL) and washed twice with 10% Na<sub>2</sub>S<sub>2</sub>O<sub>3</sub>/saturated aqueous

NaHCO<sub>3</sub> solution (15 mL, v/v = 1/1). The aqueous layer was extracted with CH<sub>2</sub>Cl<sub>2</sub> (3×10 mL). The combined organic extracts were washed with brine, dried over anhydrous sodium sulfate, and concentrated under reduced pressure. The residue was purified by column chromatography (10% ethyl acetate/petroleum ether) to give **S2** as a colorless oil (0.510 g, 90% yield). Analytical data for **S2**: R<sub>f</sub> = 0.40 (petroleum ether/ethyl acetate = 10/1); <sup>1</sup>H NMR (400 MHz, CDCl<sub>3</sub>) δ 7.71–7.65 (m, 2H), 7.50–7.43 (m, 1H), 7.40–7.32 (m, 2H), 7.20 (s, 1H), 7.18–7.16 (m, 1H), 6.84–6.74 (m, 2H), 5.80–5.71 (m, 1H), 5.55–5.47 (m, 1H), 4.36 (s, 2H), 3.73 (s, 3H), 3.40 (t, *J* = 6.4 Hz, 2H), 2.46–2.37 (m, 2H), 1.65–1.57 (m, 2H), 1.56–1.49 (m, 2H); <sup>13</sup>C {<sup>1</sup>H} NMR (100 MHz, CDCl<sub>3</sub>) δ 198.5, 159.3, 148.2, 138.0, 132.3, 130.8, 129.7, 129.4, 128.3, 125.7, 113.9, 72.7, 69.9, 55.4, 32.2, 29.6, 24.9; HRMS (ESI-Orbitrap) *m/z*: [M + H]<sup>+</sup> Calcd for C<sub>21</sub>H<sub>25</sub>O<sub>3</sub> 325.1798; Found 325.1804.

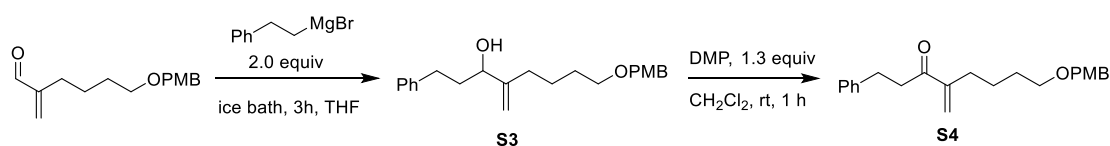

To a solution of 6-((4-methoxybenzyl)oxy)-2-methylenehexanal (2.830 g, 11.4 mmol, 1.0 equiv) in freshly distilled THF (110 mL) at 0 °C was added phenethylmagnesium bromide (1 M, 23.0 mL, 22.8 mmol, 2.0 equiv) dropwise under argon atmosphere. After the aldehyde was consumed completely, saturated aqueous ammonium chloride (20 mL) was added carefully and the mixture was extracted with ethyl acetate (30 mL×3). The combined organic extracts were washed with brine, dried over anhydrous sodium sulfate, filtered, and concentrated under reduced pressure. The residue was purified by silica gel column chromatography (30% ethyl acetate/petroleum ether) to give **S3** as a colorless oil (2.201 g, 62% yield). Analytical data for **S3**: R<sub>f</sub> = 0.30 (petroleum ether/ethyl acetate = 4/1); <sup>1</sup>H NMR (400 MHz, CDCl<sub>3</sub>) δ 7.31–7.26 (m, 1H), 7.26–7.21 (m, 3H), 7.20–7.14 (m, 3H), 6.90–6.81 (m, 2H), 5.03 (s, 1H), 4.88–4.84 (m, 1H), 4.41 (s, 2H), 4.09–4.03 (m, 1H), 3.77 (s, 3H), 3.43 (t, *J* = 6.4 Hz, 2H), 2.78–2.55 (m, 2H), 2.14–1.92 (m, 2H), 1.92–1.76 (m, 2H), 1.66–1.57 (m, 2H), 1.56–1.46 (m, 2H); <sup>13</sup>C {<sup>1</sup>H} NMR (100 MHz, CDCl<sub>3</sub>) δ 159.1, 151.6, 142.1, 130.7, 129.3, 128.5, 128.4, 125.8, 113.8, 109.8, 74.7, 72.6, 69.9, 55.3, 37.1, 32.0, 31.1, 29.6, 24.7; HRMS (ESI-Orbitrap) *m/z*: [M + H]<sup>+</sup> Calcd for C<sub>23</sub>H<sub>31</sub>O<sub>3</sub> 355.2268; Found 355.2260.

The alcohol **S3** obtained above was dissolved in CH<sub>2</sub>Cl<sub>2</sub> (100 mL) and DMP (3.451 g, 8.138 mmol, 1.3 equiv) was added portionwise. After stirring for 1 h, the mixture was diluted with CH<sub>2</sub>Cl<sub>2</sub> (100 mL) and washed twice with 10% Na<sub>2</sub>S<sub>2</sub>O<sub>3</sub>/saturated aqueous NaHCO<sub>3</sub> solution (50 mL, v/v =

1/1). The aqueous layer was extracted with CH<sub>2</sub>Cl<sub>2</sub> (3×40 mL). The combined organic extracts were washed with brine, dried over anhydrous sodium sulfate, and concentrated under reduced pressure. The residue was purified by column chromatography (10% ethyl acetate/petroleum ether) to give **S4** as a colorless oil (1.66 g, 80% yield). Analytical data for **S4**: R<sub>f</sub> = 0.40 (petroleum ether/ethyl acetate = 10/1); <sup>1</sup>H NMR (400 MHz, CDCl<sub>3</sub>) δ 7.31–7.26 (m, 3H), 7.26–7.24 (m, 1H), 7.23–7.17 (m, 3H), 6.91–6.85 (m, 2H), 5.97 (s, 1H), 5.71 (s, 1H), 4.43 (s, 2H), 3.80 (s, 3H), 3.45 (t, *J* = 6.4 Hz, 2H), 3.07–2.89 (m, 4H), 2.35–2.25 (m, 2H), 1.66–1.55 (m, 2H), 1.53–1.44 (m, 2H); <sup>13</sup>C {<sup>1</sup>H} NMR (100 MHz, CDCl<sub>3</sub>) δ 201.0, 159.2, 148.7, 141.4, 130.8, 129.3, 128.6, 128.5, 126.2, 124.0, 113.9, 72.7, 69.9, 55.4, 39.7, 30.7, 30.5, 29.5, 25.1; HRMS (ESI-Orbitrap) *m/z*: [M + Na]<sup>+</sup> Calcd for C<sub>23</sub>H<sub>28</sub>NaO<sub>3</sub> 375.1931; Found 375.1922.

#### Procedure for the preparation of α-substituted α, β-unsaturated *N*-sulfinyl ketimines

To a stirring solution of α-substituted α, β-unsaturated ketone (1.0 equiv) in dry THF (~1 M) in flame-dried round-bottom flask equipped with a magnetic stirring bar was added *N*-*tert*-butanesulfinamide (1.5 equiv) and Ti(OEt)<sub>4</sub> (tech. grade, ~20% Ti; 2.0 equiv). Then the flask was heated in a heating mantle at 76 °C. The reaction progress was monitored by TLC and the reaction mixture was cooled to room temperature after 20–30 h. The mixture was diluted with ethyl acetate (EtOAc) and an equal volume of brine was added with rapid stirring. The resulting suspension was filtered through a plug of celite and the filter cake was washed with EtOAc. The filtrate was transferred to a separatory funnel where the organic layer was washed with brine. The brine layer was extracted once with a small volume of EtOAc, and the combined organic portions were dried over Na<sub>2</sub>SO<sub>4</sub>, filtered, and concentrated. The residue was purified by silica gel chromatography.

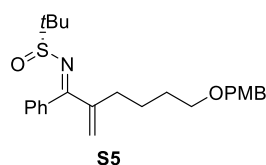

(*R,Z*)-*N*-(6-((4-Methoxybenzyl)oxy)-2-methylene-1-phenylhexylidene)-

2-methylpropane-2-sulfinamide (**S5**): The title compound was prepared according to the above procedure using 6-((4-methoxybenzyl)oxy)-2-methylene-1-phenylhexan-1-one (**S2**) (1.46 g, 4.500 mmol, 1.0 equiv),

(*R*)-*N*-*tert*-butanesulfinamide (0.86 g, 6.75 mmol, 1.5 equiv), and titanium ethoxide (2.0 mL, 9.01 mmol, 2.0 equiv). Column chromatography (25% ethyl acetate/petroleum ether) afforded **S5** (1.576 g, 82%) as a yellow oil. Analytical data for **S5** (mixture of imino *Z/E* isomers): R<sub>f</sub> = 0.30 (petroleum ether/ethyl acetate = 3/1); [α]<sub>D</sub><sup>20</sup> = –93.0 (*c* 0.14, CH<sub>2</sub>Cl<sub>2</sub>); <sup>1</sup>H NMR (400 MHz, C<sub>6</sub>D<sub>6</sub>) δ 7.87 (s,

1H), 7.29–7.15 (m, 3H), 7.10 (s, 3H), 6.85–6.76 (m, 2H), 5.49–5.20 (m, 1H), 5.08 (s, 1H), 4.30 (s, 2H), 3.34 (s, 5H), 2.69–2.12 (m, 2H), 1.72–1.44 (m, 4H), 1.22 (s, 9H); <sup>13</sup>C {<sup>1</sup>H} NMR (100 MHz, C<sub>6</sub>D<sub>6</sub>) δ 180.1, 159.6, 150.3, 146.6, 137.1, 132.1, 131.4, 129.4, 128.9, 115.8, 114.1, 72.7, 69.9, 56.3, 54.9, 35.8, 32.3, 30.0, 26.0, 24.0, 22.5; HRMS (ESI-Orbitrap) *m/z*: [M+H]<sup>+</sup> Calcd for C<sub>25</sub>H<sub>34</sub>NO<sub>3</sub>S 428.2254 ; Found 428.2253.

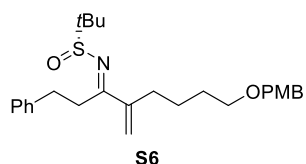

(*R,E*)-*N*-(8-((4-Methoxybenzyl)oxy)-4-methylene-1-phenyloctan-3-ylidene)-2-methylpropane-2-sulfinamide (**S6**): Synthetic procedure same with **S5** was followed using 8-((4-methoxybenzyl)oxy)-4-

methylene-1-phenyloctan-3-one (**S4**) (1.660 g, 3.51 mmol, 1.0 equiv), (*R*)-*N*-*tert*-butanesulfinamide (0.642 g, 5.26 mmol, 1.5 equiv), and titanium ethoxide (1.8 mL, 7.02 mmol, 2.0 equiv). Column chromatography (20% ethyl acetate/petroleum ether) afforded **S6** (1.95 g, 90%) as a pale yellow oil. Analytical data for **S6**: *R<sub>f</sub>* = 0.30 (petroleum ether/ethyl acetate = 4/1); [α]<sup>20</sup><sub>D</sub> = – 113.7 (*c* 0.11, CH<sub>2</sub>Cl<sub>2</sub>); <sup>1</sup>H NMR (400 MHz, C<sub>6</sub>D<sub>6</sub>) δ 7.37–7.28 (m, 2H), 7.28–7.22 (m, 2H), 7.13 (s, 2H), 7.09–7.03 (m, 1H), 6.85–6.79 (m, 2H), 5.42 (s, 1H), 5.18 (s, 1H), 4.35 (s, 2H), 3.40–3.33 (m, 2H), 3.34–3.28 (m, 4H), 3.28–3.16 (m, 1H), 3.10–2.98 (m, 1H), 2.93–2.82 (m, 1H), 2.37–2.25 (m, 2H), 1.66–1.50 (m, 4H), 1.21 (s, 9H); <sup>13</sup>C {<sup>1</sup>H} NMR (100 MHz, C<sub>6</sub>D<sub>6</sub>) δ 178.4, 159.7, 148.6, 141.4, 131.4, 129.4, 129.0, 128.8, 126.6, 120.4, 114.1, 72.8, 70.0, 57.5, 54.8, 35.9, 33.9, 33.0, 30.2, 26.1, 22.9; HRMS (ESI-Orbitrap) *m/z*: [M + H]<sup>+</sup> Calcd for C<sub>27</sub>H<sub>38</sub>NO<sub>3</sub>S 456.2567; Found 456.2559.

### Procedures for the preparation of unknown enesulfinamides

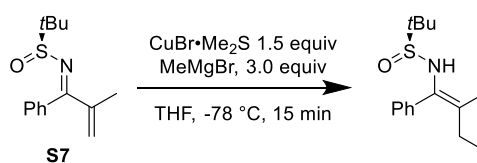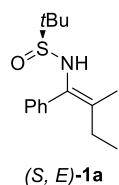

(*S,E*)-2-methyl-*N*-(2-methyl-1-phenylbut-1-en-1-yl)propane-2-sulfinamide ((*Ss*, *E*)-**1a**): To a 10 mL Schlenk flask containing anhydrous CuBr·Me<sub>2</sub>S (flame dried and backfilled with argon) (92.73 mg, 0.451 mmol, 1.5 equiv) was added freshly distilled THF (0.15 M). This suspension was cooled to –78 °C and methylmagnesium bromide

in diethoxymethane (3.0 M, 0.3 mL, 0.9 mmol, 3.0 equiv) was added, after which a clear colorless solution formed. A solution of **S7** (74.98 mg, 0.300 mmol, 1.0 equiv) in THF (0.1 M) was then added via syringe. The flask containing the imine solution was rinsed once with 0.5 mL of THF and

the resulting solution was added by syringe to the reaction flask. The reaction progress was monitored by TLC. Upon completion, the reaction mixture was quenched with saturated aqueous ammonium chloride and extracted with CH<sub>2</sub>Cl<sub>2</sub> (5 mL×3). The combined organic extracts were dried over anhydrous sodium sulfate, filtered and concentrated under reduced pressure (in ≤ 25 °C water bath). The reaction using **S7** (1.0 equiv)/CuBr·Me<sub>2</sub>S (1.5 equiv)/MeMgBr (3.0 equiv) afforded enesulfonamides with ~1:1 *Z/E* (the *Z/E* ratio was determined by <sup>1</sup>H NMR analysis of the crude reaction mixture). The residue was purified by column chromatography (5% ethyl acetate/petroleum ether) to afford (*S,S*, *E*)-2-methyl-*N*-(2-methyl-1-phenylbut-1-en-1-yl) propane-2-sulfonamide ((*S,S*, *E*)-**1a**) (solvent was removed under reduced pressure in ≤ 37 °C water bath) (28.6 mg, 36% yield). Analytical data for (*S,S*, *E*)-**1a**: *R*<sub>f</sub> = 0.25 (petroleum ether/ethyl acetate = 3/1); mp 96–97 °C; [α]<sub>D</sub><sup>20</sup> = –55.9 (*c* 0.13, CH<sub>2</sub>Cl<sub>2</sub>); <sup>1</sup>H NMR (400 MHz, C<sub>6</sub>D<sub>6</sub>) δ 7.51–7.45 (m, 2H), 7.15–7.12 (m, 2H), 7.09–7.01 (m, 1H), 4.94 (s, 1H), 1.95 (q, *J* = 7.6 Hz, 2H), 1.71 (s, 3H), 0.93 (s, 9H), 0.84 (t, *J* = 7.6 Hz, 3H); <sup>13</sup>C {<sup>1</sup>H} NMR (100 MHz, C<sub>6</sub>D<sub>6</sub>) δ 131.7, 126.8, 123.6, 121.5, 121.0, 117.1, 48.5, 21.0, 15.5, 9.4, 6.4; HRMS (ESI-Orbitrap) *m/z*: [M+H]<sup>+</sup> Calcd for C<sub>15</sub>H<sub>24</sub>NOS 266.1573; Found 266.1568. (Note: Very recently, we were succeeded in stereoselective synthesis of this enesulfonamide via 1,4-reduction using suitable α,β-unsaturated ketimine. The more effective 1,4-reduction protocol will be published in near future.)

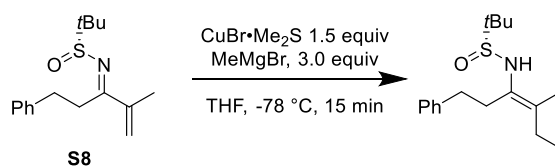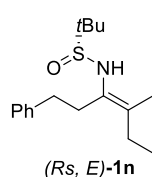

(*R,S*, *E*)-2-Methyl-*N*-(4-methyl-1-phenylhex-3-en-3-yl)propane-2-sulfonamide ((*R,S*, *E*)-**1n**): To a 10 mL Schlenk flask containing anhydrous CuBr·Me<sub>2</sub>S (flame dried and backfilled with argon) (92.73 mg, 0.451 mmol, 1.5 equiv) was added freshly distilled THF (0.15 M). This suspension was cooled to –78 °C and

methylmagnesium bromide in diethoxymethane (3.0 M, 0.3 mL, 0.9 mmol, 3.0 equiv) was added, after which a clear colorless solution formed. A solution of **S8** (83.15 mg, 0.300 mmol, 1.0 equiv) in THF (0.1 M) was then added via syringe. The flask containing the imine solution was rinsed once with 0.5 mL of THF and the resulting solution was added by syringe to the reaction flask. The reaction progress was monitored by TLC. Upon completion, the reaction mixture was quenched

with saturated aqueous ammonium chloride and extracted with CH<sub>2</sub>Cl<sub>2</sub> (5 mL×3). The combined organic extracts were dried over anhydrous sodium sulfate, filtered and concentrated under reduced pressure (in ≤ 25 °C water bath). The reaction using unsaturated **S8** (1.0 equiv)/ CuBr·Me<sub>2</sub>S (1.5 equiv)/MeMgBr (3.0 equiv) afforded enesulfonamides with ~1.5:1 *Z/E* (the *Z/E* ratio was determined by <sup>1</sup>H NMR analysis of the crude reaction mixture). The residue was purified by column chromatography (5% ethyl acetate/petroleum ether) to afford (*R,S*, *E*)-2-methyl-*N*-(4-methyl-1-phenylhex-3-en-3-yl)propane-2-sulfonamide (*R,S*, *E*)-**1n** (solvent was removed under reduced pressure in ≤ 37 °C water bath) (29.5 mg, 34% yield) as a colorless oil. Analytical data for (*R,S*, *E*)-**1n**: *R<sub>f</sub>* = 0.3 (petroleum ether/ethyl acetate = 5/1); [ $\alpha$ ]<sub>D</sub><sup>20</sup> = -25.8 (*c* 0.10, CH<sub>2</sub>Cl<sub>2</sub>); <sup>1</sup>H NMR (400 MHz, C<sub>6</sub>D<sub>6</sub>)  $\delta$  7.20–7.16 (m, 3H), 7.16–7.13 (m, 1H), 7.09–7.04 (m, 1H), 4.57 (s, 1H), 2.92–2.83 (m, 1H), 2.83–2.74 (m, 1H), 2.71–2.62 (m, 1H), 2.56–2.46 (m, 1H), 1.86–1.78 (m, 2H), 1.58 (s, 3H), 1.04 (s, 9H), 0.77 (t, *J* = 7.6 Hz, 3H); <sup>13</sup>C {<sup>1</sup>H} NMR (100 MHz, C<sub>6</sub>D<sub>6</sub>)  $\delta$  142.2, 131.5, 128.9, 128.7, 126.3, 123.9, 55.5, 34.8, 33.6, 27.1, 22.5, 16.3, 13.1; HRMS (ESI-Orbitrap) *m/z*: [M+H]<sup>+</sup> Calcd for C<sub>17</sub>H<sub>28</sub>NOS 294.1886; Found 294.1878. (Note: Very recently, we were succeeded in stereoselective synthesis of this enesulfonamide via 1,4-reduction using suitable  $\alpha,\beta$ -unsaturated ketimine. The more effective 1,4-reduction protocol will be published in near future.)

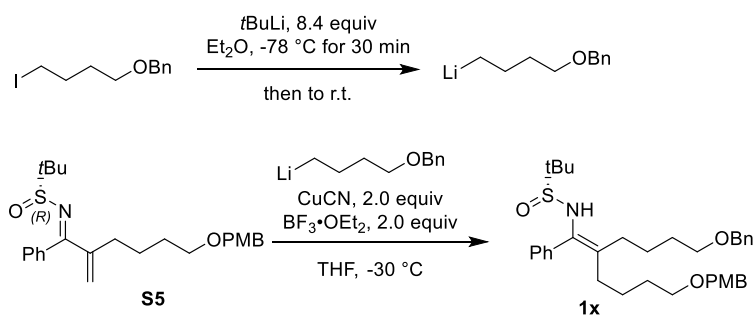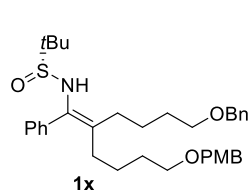

(*R,E*)-*N*-(6-(benzyloxy)-2-(4-((4-methoxybenzyl)oxy)butyl)-1-phenylhex-1-en-1-yl)-2-methylpropane-2-sulfonamide (**1x**):

To a solution of 3-benzyloxypropyl iodide (132.8 mg, 0.481 mmol, 4.0 equiv) in 10 mL Schlenk flask in dry diethyl ether (2.5 mL) at -78 °C under argon atmosphere was added *t*BuLi (1.3 M in hexane, 0.777 mL, 1.011 mmol, 8.4 equiv) dropwise via syringe. The mixture was stirred at -78 °C for 30 min and then warmed to rt and stirred for further 30 min to form clear colorless solution. To a separate 10 mL Schlenk flask containing anhydrous CuCN (flame dried and backfilled with argon) (21.6 mg, 0.241 mmol, 2.0 equiv) was added freshly



distilled THF (1.6 mL). This suspension was cooled to  $-30\text{ }^{\circ}\text{C}$  and (3-(benzyloxy)propyl)lithium prepared above was transferred via syringe to this flask. Then it was warmed to  $0\text{ }^{\circ}\text{C}$  and stirred for 10 min to form a clear solution. The solution was cooled back to  $-30\text{ }^{\circ}\text{C}$ . A solution of **S5** (51.2 mg, 0.120 mmol, 1.0 equiv) in THF (1.0) was added via syringe. The flask containing the imine solution was rinsed once with 0.5 mL of THF and the resulting solution was added by syringe to the reaction flask. The reaction progress was monitored by TLC. After 10 min, it was quenched by addition of saturated aqueous ammonium chloride (2.0 mL) and extracted with  $\text{CH}_2\text{Cl}_2$  (10 mL $\times$ 3). The combined organic extracts were dried over anhydrous sodium sulfate, and concentrated under reduced pressure (in  $\leq 25\text{ }^{\circ}\text{C}$  water bath). The residue was purified by column chromatography (25% ethyl acetate/petroleum ether) to afford **1x** (solvent was removed under reduced pressure in  $\leq 37\text{ }^{\circ}\text{C}$  water bath) (58.7 mg, 84%) as a colorless oil. Analytical data for **1x**:  $R_f = 0.2$  (petroleum ether/ethyl acetate = 3/1);  $[\alpha]_D^{20} = +29.6$  ( $c$  0.11,  $\text{CH}_2\text{Cl}_2$ );  $^1\text{H NMR}$  (400 MHz,  $\text{C}_6\text{D}_6$ )  $\delta$  7.53–7.48 (m, 2H), 7.37–7.32 (m, 2H), 7.24–7.17 (m, 5H), 7.13–7.05 (m, 2H), 6.87–6.78 (m, 2H), 5.22 (s, 1H), 4.37 (s, 2H), 4.28 (s, 2H), 3.43–3.36 (m, 2H), 3.31 (s, 3H), 3.23–3.18 (m, 2H), 2.36–2.26 (m, 2H), 2.16–1.99 (m, 2H), 1.75–1.64 (m, 4H), 1.57–1.41 (m, 4H), 0.97 (s, 9H);  $^{13}\text{C}$   $\{^1\text{H}\}$  NMR (100 MHz,  $\text{C}_6\text{D}_6$ )  $\delta$  159.6, 139.5, 138.7, 135.0, 131.5, 130.8, 129.3, 128.6, 128.5, 128.0, 127.6, 126.0, 114.1, 73.0, 72.7, 70.3, 69.9, 55.5, 54.8, 32.2, 30.3, 29.94, 29.92, 25.8, 25.3, 22.5; HRMS (ESI-Orbitrap)  $m/z$ :  $[\text{M} + \text{H}]^+$  Calcd for  $\text{C}_{35}\text{H}_{48}\text{NO}_4\text{S}$  578.3299; Found 578.3295.

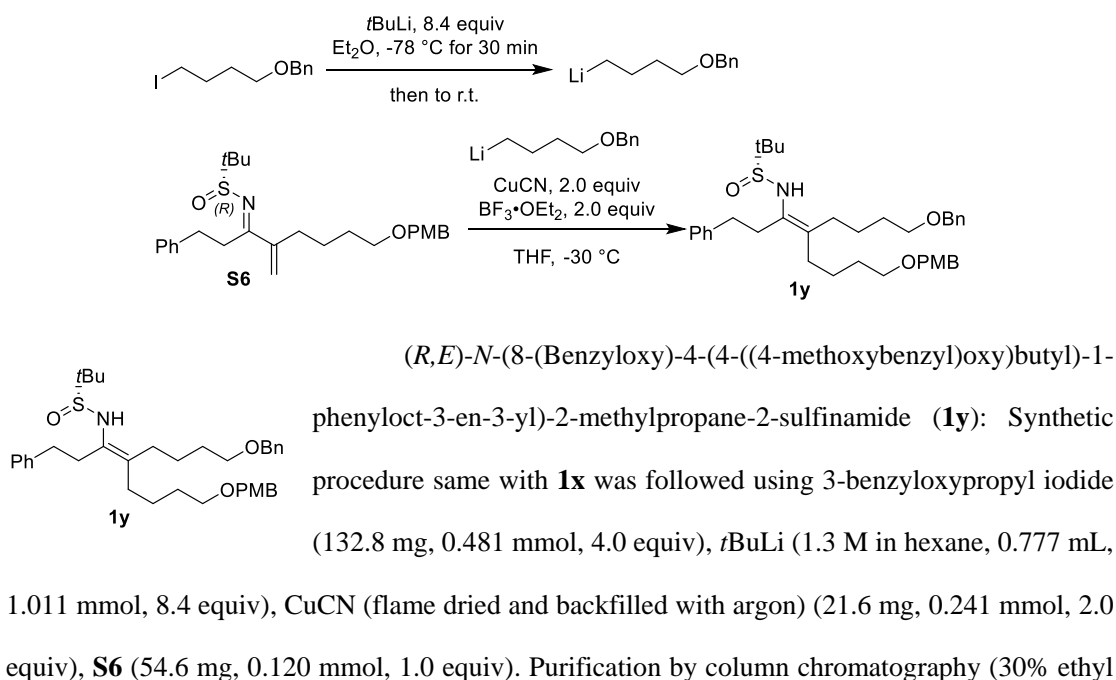

acetate/petroleum ether) afforded **1y** (44.1 mg, 61%) as a colorless oil. Analytical data for **1y**:  $R_f = 0.2$  (petroleum ether/ethyl acetate = 3/1);  $[\alpha]_D^{20} = -25.7$  ( $c$  0.11,  $\text{CH}_2\text{Cl}_2$ );  $^1\text{H NMR}$  (400 MHz,  $\text{C}_6\text{D}_6$ )  $\delta$  7.38–7.29 (m, 2H), 7.29–7.18 (m, 7H), 7.13–7.03 (m, 2H), 6.85–6.78 (m, 2H), 4.82 (s, 1H), 4.35 (d,  $J = 3.6$  Hz, 4H), 3.36–3.28 (m, 7H), 2.94–2.77 (m, 2H), 2.77–2.58 (m, 2H), 2.26–2.15 (m, 1H), 2.07–1.97 (m, 1H), 1.95–1.81 (m, 2H), 1.62–1.51 (m, 6H), 1.45–1.34 (m, 2H), 1.07 (s, 9H);  $^{13}\text{C}$   $\{^1\text{H}\}$  NMR (100 MHz,  $\text{C}_6\text{D}_6$ )  $\delta$  159.7, 142.1, 139.5, 132.5, 131.5, 129.4, 129.0, 128.7, 128.6, 127.6, 126.6, 126.3, 114.1, 73.0, 72.8, 70.3, 55.5, 54.8, 34.8, 33.3, 31.7, 30.4, 30.36, 30.31, 26.0, 25.5, 22.6; HRMS (ESI-Orbitrap)  $m/z$ :  $[\text{M}+\text{H}]^+$  Calcd for  $\text{C}_{37}\text{H}_{52}\text{NO}_4\text{S}$  606.3612; Found 606.3599.

### Procedure for the preparation of $\beta$ -nitroenones with modified elimination conditions

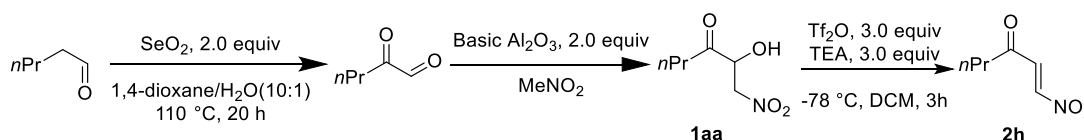

In an oven-dried 100 mL round-bottom flask equipped with a reflux condenser and an argon inlet, selenium dioxide (2.22 g, 20.0 mmol, 2.0 equiv) was taken in 11 mL 1,4-dioxane/ $\text{H}_2\text{O}$  (10:1) and refluxed at 110 °C for 20 min. Then the resulting solution was cooled to 50 °C and pentanal (0.86 g, 10.0 mmol, 1.0 equiv) was added. After refluxing at 110 °C for 20 h, the reaction mixture was cooled to 25 °C, filtered, extracted with  $\text{CH}_2\text{Cl}_2$  three times. The combined organic extracts were washed with brine, dried over anhydrous sodium sulfate, filtered, and concentrated under reduced pressure. The crude residue was purified by flash chromatography (petroleum ether/ethyl acetate = 3/1) to afford the 2-oxopentanal as a pale yellow oil (0.31 g, 31% yield) which was used for the next step.

In an oven-dried 25 mL round-bottom flask, 2-oxopentanal (320 mg, 3.2 mmol, 1.0 equiv) was taken in 4 mL nitromethane along with basic alumina (652.4 mg, 6.4 mmol, 2.0 equiv). The resulting mixture was stirred vigorously at 25 °C for 3 h. The reaction mixture was then filtered through a pad of celite and washed with EtOAc. The combined organic layer was concentrated in vacuo. The crude residue was purified by flash chromatography (20% ethyl acetate/petroleum ether) to obtain 2-hydroxy-1-nitrohexan-3-one **1aa** as a brown oil (232 mg, 46% yield) which was used for the next step. Analytical data for compound **1aa**:  $R_f = 0.3$  (petroleum ether/ethyl acetate = 4/1);  $^1\text{H NMR}$  (400 MHz,  $\text{CDCl}_3$ )  $\delta$  4.82 (dd,  $J = 13.6, 3.6$  Hz, 1H), 4.73 (dd,  $J = 14.0, 5.2$  Hz, 1H), 4.57–4.51 (m,

1H), 4.04 (s, 1H), 2.68–2.50 (m, 2H), 1.76–1.60 (m, 2H), 0.93 (t,  $J = 7.6$  Hz, 3H);  $^{13}\text{C}$  { $^1\text{H}$ } NMR (100 MHz,  $\text{CDCl}_3$ )  $\delta$  207.4, 77.1, 73.7, 39.9, 16.9, 13.6; HRMS (ESI-Orbitrap)  $m/z$ :  $[\text{M} + \text{H}]^+$  Calcd for  $\text{C}_6\text{H}_{12}\text{NO}_4$  162.0761; Found 162.0757.

In an oven-dried 25 mL two-neck round-bottom flask equipped with an argon inlet, 2-hydroxy-1-nitrohexan-3-one **1aa** (56.9 mg, 0.35 mmol, 1.0 equiv) was taken in 4 mL  $\text{CH}_2\text{Cl}_2$  and cooled to  $-78$  °C.  $\text{TiF}_4$  (296.2 mg, 1.05 mmol, 3.0 equiv) was added and stirred at  $-78$  °C for 15 min. Then triethyl amine (106.3 mg, 1.05 mmol, 3.0 equiv) was added and the resulting solution was stirred at  $-78$  °C for 2 h. The reaction mixture was quenched by the addition of water, extracted with  $\text{CH}_2\text{Cl}_2$ . The combined organic layer was dried over anhydrous  $\text{Na}_2\text{SO}_4$ , concentrated in vacuo to obtain a brown oil which was purified by silica gel (200-300 mesh) column chromatography using (5% ethyl acetate/petroleum ether) to obtain **2h** as a pale brown oil (18.1 mg, 36% yield). Analytical data for compound **2h**:  $R_f = 0.2$  (petroleum ether/ethyl acetate = 15/1);  $^1\text{H}$  NMR (400 MHz,  $\text{CDCl}_3$ )  $\delta$  7.53 (d,  $J = 13.6$  Hz, 1H), 7.30–7.24 (m, 1H), 2.67 (t,  $J = 7.2$  Hz, 2H), 1.76–1.64 (m, 2H), 0.96 (t,  $J = 7.2$  Hz, 3H);  $^{13}\text{C}$  { $^1\text{H}$ } NMR (100 MHz,  $\text{CDCl}_3$ )  $\delta$  197.3, 146.9, 131.7, 45.1, 17.0, 13.6; HRMS (ESI-Orbitrap)  $m/z$ :  $[\text{M} + \text{H}]^+$  Calcd for  $\text{C}_6\text{H}_{10}\text{NO}_3$  144.0655; Found 144.0651.

The same procedure as above was followed for the synthesis of **1ab** and **2i**.

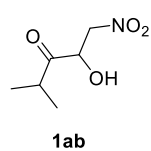

2-Hydroxy-4-methyl-1-nitropentan-3-one (**1ab**): According to the above procedure, the reaction using selenium dioxide (2.22 g, 20.0 mmol, 2.0 equiv), 11 mL 1,4-dioxane/ $\text{H}_2\text{O}$  (10:1), 3-methylbutanal (0.86 g, 10.0 mmol, 1.0 equiv) afforded 3-methyl-2-oxobutanal as a light brown oil (0.32 g, 32% yield) which was used for the next step.

The reaction using 3-methyl-2-oxobutanal (321.0 mg, 3.2 mmol, 1.0 equiv), nitromethane (4 mL), and basic alumina (652.4 mg, 6.4 mmol, 2.0 equiv), afforded 2-hydroxy-4-methyl-1-nitropentan-3-one (**1ab**) as a pale brown oil (252.6 mg, 49% yield). Analytical data for compound **1ab**:  $R_f = 0.2$  (petroleum ether/ethyl acetate = 4/1);  $^1\text{H}$  NMR (400 MHz,  $\text{CDCl}_3$ )  $\delta$  4.86–4.68 (m, 3H), 3.78 (s, 1H), 3.07–2.95 (m, 1H), 1.20 (t,  $J = 7.2$  Hz, 6H);  $^{13}\text{C}$  { $^1\text{H}$ } NMR (100 MHz,  $\text{CDCl}_3$ )  $\delta$  211.3, 72.2, 67.1, 36.3, 19.1, 17.8; HRMS (ESI-Orbitrap)  $m/z$ :  $[\text{M} + \text{H}]^+$  Calcd for  $\text{C}_6\text{H}_{12}\text{NO}_4$  162.0761; Found 162.0757.

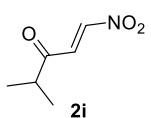

(*E*)-4-Methyl-1-nitropent-1-en-3-one (**2i**): According to the above procedure, the reaction using 2-hydroxy-4-methyl-1-nitropentan-3-one (**1ab**) (162.0 mg, 1.00 mmol, 1.0 equiv),  $\text{TiF}_4$  (846.4 mg, 3.01 mmol, 3.0 equiv), and triethyl amine (303.8

mg, 3.01 mmol, 3.0 equiv) afforded pure **2i** as a pale brown oil (100.1 mg, 70% yield). Analytical data for compound **2i**:  $R_f = 0.2$  (petroleum ether/ethyl acetate = 15/1);  $^1\text{H NMR}$  (400 MHz,  $\text{CDCl}_3$ )  $\delta$  7.53 (d,  $J = 13.6$  Hz, 1H), 7.38 (d,  $J = 13.2$  Hz, 1H), 2.92–2.74 (m, 1H), 1.16 (d,  $J = 6.8$  Hz, 6H);  $^{13}\text{C}$   $\{^1\text{H}\}$  NMR (100 MHz,  $\text{CDCl}_3$ )  $\delta$  200.7, 147.1, 130.6, 41.5, 17.5; HRMS (ESI-Orbitrap)  $m/z$ :  $[\text{M} + \text{H}]^+$  Calcd for  $\text{C}_6\text{H}_{10}\text{NO}_3$  144.0655; Found 144.0650.

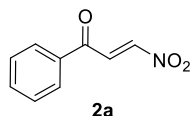

(*E*)-3-Nitro-1-phenylprop-2-en-1-one (**2a**): According to the above procedure, the reaction of 2-hydroxy-3-nitro-1-phenylpropan-1-one (195.2 mg, 1.00 mmol, 1.0 equiv),  $\text{Tf}_2\text{O}$  (846.4 mg, 3.01 mmol, 3.0 equiv), and triethyl amine (303.8 mg, 3.01 mmol, 3.0 equiv) afforded **2a** as a yellow solid (150.6 mg, 85% yield). The NMR data for **2a** were identical to the reported.<sup>S3</sup>

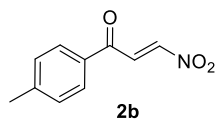

(*E*)-3-Nitro-1-(*p*-tolyl)prop-2-en-1-one (**2b**): According to the above procedure, the reaction of 2-hydroxy-3-nitro-1-(*p*-tolyl)propan-1-one (209.2 mg, 1.00 mmol, 1.0 equiv),  $\text{Tf}_2\text{O}$  (846.4 mg, 3.01 mmol, 3.0 equiv), and triethyl amine (303.8 mg, 3.01 mmol, 3.0 equiv) afforded **2b** as a yellow solid (145.3 mg, 76% yield). The NMR data for **2b** were identical to the reported.<sup>S3</sup>

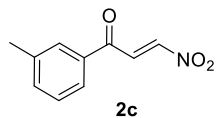

(*E*)-3-Nitro-1-(*m*-tolyl)prop-2-en-1-one (**2c**): According to the above procedure, the reaction of 2-hydroxy-3-nitro-1-(*m*-tolyl)propan-1-one (209.2 mg, 1.00 mmol, 1.0 equiv),  $\text{Tf}_2\text{O}$  (846.4 mg, 3.01 mmol, 3.0 equiv), and triethyl amine (303.8 mg, 3.01 mmol, 3.0 equiv) afforded **2c** as a yellow solid (137.6 mg, 72% yield). The NMR data for **2c** were identical to the reported.<sup>S3</sup>

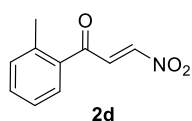

(*E*)-3-Nitro-1-(*o*-tolyl)prop-2-en-1-one (**2d**): According to the above procedure, the reaction of 2-hydroxy-3-nitro-1-(*o*-tolyl)propan-1-one (209.6 mg, 1.01 mmol, 1.0 equiv),  $\text{Tf}_2\text{O}$  (846.4 mg, 3.01 mmol, 3.0 equiv), and triethyl amine (303.8 mg, 3.01 mmol, 3.0 equiv) afforded **2d** as a yellow solid (143.2 mg, 75% yield). The NMR data for **2d** were identical to the reported.<sup>S3</sup>

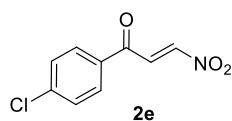

(*E*)-1-(4-Chlorophenyl)-3-nitroprop-2-en-1-one (**2e**): According to the above procedure, the reaction of 1-(4-chlorophenyl)-2-hydroxy-3-nitropropan-1-one (229.6 mg, 1.00 mmol, 1.0 equiv),  $\text{Tf}_2\text{O}$  (846.4 mg, 3.01 mmol, 3.0 equiv), and triethyl amine (303.8 mg, 3.01 mmol, 3.0 equiv) afforded **2e** as a yellow solid (114.3 mg, 54% yield). The NMR data for **2e** were identical to the reported.<sup>S3</sup>

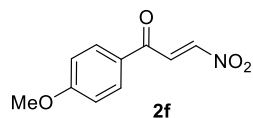

(*E*)-1-(4-Methoxyphenyl)-3-nitroprop-2-en-1-one (**2f**): According the above procedure, the reaction of 2-hydroxy-1-(4-methoxyphenyl)-3-nitropropan-1-one (225.2 mg, 1.00 mmol, 1.0 equiv), Tf<sub>2</sub>O (846.4 mg, 3.01 mmol, 3.0 equiv) triethyl amine (303.8 mg, 3.01 mmol, 3.0 equiv) afforded **2f** as a yellow solid (134.7 mg, 65% yield). The NMR data for **2f** were identical to the reported.<sup>S3</sup>

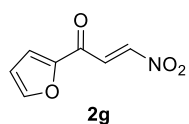

(*E*)-1-(Furan-2-yl)-3-nitroprop-2-en-1-one (**2g**): According the above procedure, the reaction of 1-(furan-2-yl)-2-hydroxy-3-nitropropan-1-one (183.9 mg, 1.01 mmol, 1.0 equiv), Tf<sub>2</sub>O (846.4 mg, 3.01 mmol, 3.0 equiv), and triethyl amine (303.8 mg, 3.01 mmol, 3.0 equiv) afforded **2g** as a yellow solid (120.0 mg, 73% yield). The NMR data for **2g** were identical to the reported.<sup>S3</sup>

#### Procedure for the preparation of β-sulfonyl acrylonitriles **4a** and **4b**

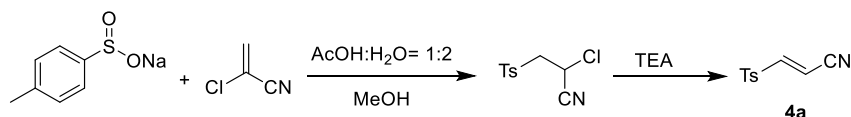

Sodium 4-methylbenzenesulfonate (8.9 g, 50 mmol, 1.0 equiv) was dissolved in water/acetic acid (2:1, 26.5 mL), and 2-chloroprop-2-enenitrile (4.41 g, 50 mmol, 1.0 equiv) was added. After 20 min, methanol (14.7 mL) was added, and 2-chloro-3-tosylpropanenitrile precipitated. The product was collected by filtration and dissolved without further purification in CH<sub>2</sub>Cl<sub>2</sub> (65 mL). The solution was cooled to 0 °C, and triethylamine (4.7 g, 47 mmol, 0.95 equiv) was added dropwise. After 1 h, the reaction mixture was extracted with aqueous HCl (1 N, 3 × 50 mL). The aqueous phase was adjusted to pH 8 with sodium bicarbonate and again extracted with CH<sub>2</sub>Cl<sub>2</sub> (3 × 17 mL). The combined organic layers were dried over Na<sub>2</sub>SO<sub>4</sub>, and the solvent was removed under reduced pressure. The crude product was recrystallized from EtOAc/hexane (7:3), and the (*E*)-3-tosylacrylonitrile (9.1 g, 88%) was obtained as colorless needles. The NMR data for **4a** were identical to the reported.<sup>S6</sup>

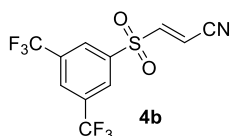

(*E*)-3-((3,5-Bis(trifluoromethyl)phenyl)sulfonyl)acrylonitrile (**4b**): The same procedure for the preparation of **4a** was followed using sodium 3,5-bis(trifluoromethyl) benzenesulfonate (14.95 g, 50 mmol, 1.0 equiv), water/acetic acid (2:1, 26.5 mL), 2-chloroprop-2-enenitrile (4.41 g, 50 mmol, 1.0 equiv), and

methanol (14.7 mL). The crude product was recrystallized from EtOAc/hexane (7:3), and the (*E*)-3-((3,5-bis(trifluoromethyl) phenyl) sulfonyl) acrylonitrile (13.65 g, 83%) was obtained as colorless needles. Analytical data for compound **4b**:  $R_f = 0.2$  (petroleum ether/ethyl acetate = 6/1); mp 166–167 °C;  $^1\text{H NMR}$  (400 MHz,  $\text{CDCl}_3$ )  $\delta$  8.43–8.29 (m, 2H), 8.23 (s, 1H), 7.25 (d,  $J = 15.6$  Hz, 1H), 6.72 (d,  $J = 15.6$  Hz, 1H);  $^{13}\text{C}$  { $^1\text{H}$ } NMR (100 MHz,  $\text{CDCl}_3$ )  $\delta$  147.2, 140.6, 134.2 (q,  $J_{\text{C-F}} = 34.8$  Hz), 128.9 (d,  $J_{\text{C-F}} = 3.0$  Hz), 128.8–128.7 (m), 122.2 (q,  $J_{\text{C-F}} = 272.0$  Hz), 113.7, 112.8; HRMS (ESI-TOF)  $m/z$ :  $[\text{M} - \text{H}]^-$  Calcd for  $\text{C}_{11}\text{H}_4\text{F}_6\text{NO}_2\text{S}$  327.9872; Found 327.9871.

### General procedure A for synthesis of 1,5-dicarbonyl analogs using $\beta$ -nitroenone 2

Enesulfonamide **1** (1.0 equiv) or *N*-sulfinyl ketimine **6** in freshly distilled THF (0.1 M) was added to a flame dried Schlenk tube equipped with magnetic stirring bar under argon. The resulting clear solution was then cooled to  $-78$  °C and a solution of potassium *tert*-butoxide in THF (1.0 M, 1.2 equiv) was added dropwise to the mixture via syringe. After 30 min,  $\beta$ -nitroenone **2** (1.5 equiv) in dry THF (0.1 M) was added dropwise by syringe at  $-78$  °C. The reaction progress was monitored by TLC analysis. Upon completion (usually 1–2 h), the reaction mixture was quenched with saturated aqueous ammonium chloride. The resulting mixture was extracted with ethyl acetate (3 times) and the combined organic extracts were dried over anhydrous sodium sulfate, filtered and concentrated under reduced pressure. The residue was purified by silica gel column chromatography.

### General procedure B for synthesis of 1,5-dicarbonyl analogs using $\beta$ -nitroenone 2

Enesulfonamide **1** (1.0 equiv) in freshly distilled  $\text{Et}_2\text{O}$  (0.1 M) was added to a flame dried Schlenk tube equipped with magnetic stirring bar under argon. The resulting clear solution was then cooled to  $-78$  °C and a solution of potassium *tert*-butoxide in THF (1.0 M, 1.2 equiv) was added dropwise to the mixture via syringe. After 30 min,  $\beta$ -nitroenones **2** (1.5 equiv) in dry  $\text{Et}_2\text{O}$  (0.1 M) was added dropwise by syringe at  $-78$  °C. The reaction progress was monitored by TLC analysis. Upon completion (usually 2–3 h), DBU (4.0 equiv) was added at  $-78$  °C and the reaction mixture was allowed to warm to room temperature in 5 h. After stirring at room temperature for 12 hours, the reaction mixture was quenched with saturated aqueous ammonium chloride. The resulting mixture was extracted with ethyl acetate (3 times) and the combined organic extracts were dried over

anhydrous sodium sulfate, filtered and concentrated under reduced pressure. The residue was purified by silica gel column chromatography.

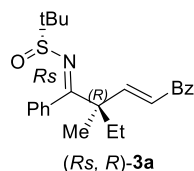

(*R*)-*N*-((*R*,1*Z*,3*E*)-2-ethyl-2-methyl-5-oxo-1,5-diphenylpent-3-en-1-ylidene)-2-methylpropane-2-sulfonamide ((*R*<sub>S</sub>, *R*)-**3a**): According to the general procedure A, reaction was performed using enesulfonamide **1a** (26.6 mg, 0.100 mmol, 1.0 equiv), *t*BuOK in THF (1.0 M, 120 μL, 0.12 mmol, 1.2 equiv), and **2a** (26.6 mg,

0.15 mmol, 1.5 equiv). Column chromatography (25% ethyl acetate/petroleum ether as eluent) afforded (*R*<sub>S</sub>, *R*)-**3a** as a light yellow solid (38.4 mg, 97%). Diastereomeric ratio was determined by <sup>1</sup>H NMR analysis of the crude reaction mixture (dr > 20:1). Analytical data for (*R*<sub>S</sub>, *R*)-**3a**: *R*<sub>f</sub> = 0.30 (petroleum ether/ethyl acetate = 3/1); mp 79–80 °C; [ $\alpha$ ]<sub>D</sub><sup>25</sup> = –83.6 (*c* 0.12, CH<sub>2</sub>Cl<sub>2</sub>); <sup>1</sup>H NMR (400 MHz, CDCl<sub>3</sub>)  $\delta$  7.90–7.82 (m, 2H), 7.60–7.52 (m, 1H), 7.49–7.41 (m, 2H), 7.40–7.35 (m, 3H), 7.14–7.05 (m, 3H), 6.85 (d, *J* = 15.6 Hz, 1H), 1.94–1.75 (m, 2H), 1.39 (s, 3H), 1.20 (s, 9H), 0.94 (t, *J* = 7.6 Hz, 3H); <sup>13</sup>C{<sup>1</sup>H} NMR (100 MHz, CDCl<sub>3</sub>)  $\delta$  190.6, 188.1, 152.3, 137.7, 136.6, 133.0, 129.0, 128.68, 128.66, 128.0, 126.6, 125.4, 56.4, 52.6, 31.2, 22.3, 21.0, 9.1; HRMS (ESI-Orbitrap) *m/z*: [M + H]<sup>+</sup> Calcd for C<sub>24</sub>H<sub>30</sub>NO<sub>2</sub>S 396.1992; Found 396.1988.

### Gram scale preparation of (*R*<sub>S</sub>, *R*)-**3a**

According to the general procedure A, reaction was performed using enesulfonamide **1a** (1.07 g, 4.03 mmol, 1.0 equiv), *t*BuOK in THF (1.0 M, 4.85 mL, 4.845 mmol, 1.2 equiv), and **2a** (1.062 g, 6.0 mmol, 1.5 equiv). Column chromatography (25% ethyl acetate/petroleum ether as eluent) afforded (*R*<sub>S</sub>, *R*)-**3a** as a light yellow solid (1.640 g, 97%). Diastereomeric ratio was determined by <sup>1</sup>H NMR analysis of the crude reaction mixture (dr > 20:1).

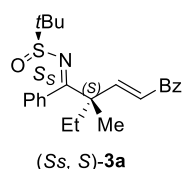

(*S*)-*N*-((*S*,1*Z*,3*E*)-2-ethyl-2-methyl-5-oxo-1,5-diphenylpent-3-en-1-ylidene)-2-methylpropane-2-sulfonamide ((*S*<sub>S</sub>, *S*)-**3a**): According to the general procedure A, reaction was performed using enesulfonamide (*S*<sub>S</sub>, *Z*)-**1a** (26.6 mg, 0.100 mmol, 1.0 equiv), *t*BuOK in THF (1.0 M, 120 μL, 0.12 mmol, 1.2 equiv), **2a** (26.6 mg,

0.150 mmol, 1.5 equiv). Column chromatography (25% ethyl acetate/petroleum ether as eluent) afforded (*S*<sub>S</sub>, *S*)-**3a** as a light yellow oil (37.9 mg, 96%). Diastereomeric ratio was determined by <sup>1</sup>H

NMR analysis of the crude reaction mixture (dr > 20:1). Analytical data for (*S<sub>S</sub>, S*)-**3a**:  $R_f = 0.30$  (petroleum ether/ethyl acetate = 3/1);  $[\alpha]_D^{25} = +86.4$  (*c* 0.16, CH<sub>2</sub>Cl<sub>2</sub>); <sup>1</sup>H NMR (400 MHz, CDCl<sub>3</sub>)  $\delta$  7.90–7.82 (m, 2H), 7.59–7.51 (m, 1H), 7.49–7.42 (m, 2H), 7.40–7.34 (m, 3H), 7.14–7.05 (m, 3H), 6.85 (d, *J* = 16.0 Hz, 1H), 1.94–1.77 (m, 2H), 1.40 (s, 3H), 1.21 (s, 9H), 0.95 (t, *J* = 7.6 Hz, 3H); <sup>13</sup>C{<sup>1</sup>H} NMR (100 MHz, CDCl<sub>3</sub>)  $\delta$  190.7, 188.1, 152.3, 137.8, 136.6, 133.0, 129.0, 128.70, 128.68, 128.1, 126.6, 125.5, 56.4, 52.6, 31.3, 22.3, 21.1, 9.1; HRMS (ESI-Orbitrap) *m/z*: [M + H]<sup>+</sup> Calcd for C<sub>24</sub>H<sub>30</sub>NO<sub>2</sub>S 396.1992; Found 396.1986.

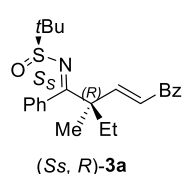

(*S*)-*N*-((*R*,1*Z*,3*E*)-2-ethyl-2-methyl-5-oxo-1,5-diphenylpent-3-en-1-ylidene)-

2-methylpropane-2-sulfinamide ((*S<sub>S</sub>, R*)-**3a**): According to the general procedure A, reaction was performed using enesulfinamide (*S<sub>S</sub>, E*)-**1a** (26.7 mg, 0.101 mmol, 1.0 equiv), *t*BuOK in THF (1.0 M, 120  $\mu$ L, 0.12 mmol, 1.2 equiv), **2a** (26.6 mg,

0.150 mmol, 1.5 equiv). Column chromatography (25% ethyl acetate/petroleum ether as eluent) afforded (*S<sub>S</sub>, R*)-**3a** as a light brown solid (36.4 mg, 92%). Diastereomeric ratio was determined by <sup>1</sup>H NMR analysis of the crude reaction mixture (dr > 20:1). Analytical data for (*S<sub>S</sub>, R*)-**3a**:  $R_f = 0.30$  (petroleum ether/ethyl acetate = 3/1); mp 92–93 °C;  $[\alpha]_D^{25} = +94.2$  (*c* 0.18, CH<sub>2</sub>Cl<sub>2</sub>); <sup>1</sup>H NMR (400 MHz, CDCl<sub>3</sub>)  $\delta$  7.89–7.82 (m, 2H), 7.61–7.52 (m, 1H), 7.49–7.42 (m, 2H), 7.41–7.33 (m, 3H), 7.14–7.04 (m, 3H), 6.83 (d, *J* = 16.0 Hz, 1H), 1.98–1.83 (m, 2H), 1.37 (s, 3H), 1.21 (s, 9H), 0.95 (t, *J* = 7.6 Hz, 3H); <sup>13</sup>C{<sup>1</sup>H} NMR (100 MHz, CDCl<sub>3</sub>)  $\delta$  190.6, 188.2, 152.3, 137.7, 136.6, 133.0, 129.0, 128.71, 128.68, 128.1, 126.6, 125.5, 56.4, 52.7, 31.3, 22.3, 21.0, 9.1; HRMS (ESI-Orbitrap) *m/z*: [M + H]<sup>+</sup> Calcd for C<sub>24</sub>H<sub>30</sub>NO<sub>2</sub>S 396.1992; Found 396.1985.

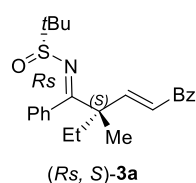

(*R*)-*N*-((*S*,1*Z*,3*E*)-2-ethyl-2-methyl-5-oxo-1,5-diphenylpent-3-en-1-ylidene)-

2-methylpropane-2-sulfinamide((*R<sub>S</sub>, S*)-**3a**): According to the general procedure A, reaction was performed using enesulfinamide (*R<sub>S</sub>, E*)-**1a** (26.8 mg, 0.102 mmol, 1.0 equiv), *t*BuOK in THF (1.0 M, 120  $\mu$ L, 0.12 mmol, 1.2 equiv), **2a**

(26.7 mg, 0.151 mmol, 1.5 equiv). Column chromatography (25% ethyl acetate/petroleum ether as eluent) afforded (*R<sub>S</sub>, S*)-**3a** as a light brown solid (36.5 mg, 92%). Diastereomeric ratio was determined by <sup>1</sup>H NMR analysis of the crude reaction mixture (dr > 20:1). Analytical data for (*R<sub>S</sub>, S*)-**3a**:  $R_f = 0.30$  (petroleum ether/ethyl acetate = 3/1); mp 104–105 °C;  $[\alpha]_D^{25} = -92.0$  (*c* 0.26, CH<sub>2</sub>Cl<sub>2</sub>); <sup>1</sup>H NMR (400 MHz, CDCl<sub>3</sub>)  $\delta$  7.89–7.82 (m, 2H), 7.59–7.51 (m, 1H), 7.49–7.41 (m, 2H), 7.39–7.33 (m, 3H), 7.14–7.04 (m, 3H), 6.82 (d, *J* = 15.6 Hz, 1H), 1.96–1.84 (m, 2H), 1.37 (s, 3H),



1.21 (s, 9H), 0.95 (t,  $J = 7.4$  Hz, 3H);  $^{13}\text{C}\{^1\text{H}\}$  NMR (100 MHz,  $\text{CDCl}_3$ )  $\delta$  190.6, 188.2, 152.2, 137.7, 136.6, 133.0, 129.0, 128.7, 128.6, 128.0, 126.6, 125.5, 56.4, 52.6, 31.3, 22.3, 21.0, 9.1; HRMS (ESI-Orbitrap)  $m/z$ :  $[\text{M} + \text{H}]^+$  Calcd for  $\text{C}_{24}\text{H}_{30}\text{NO}_2\text{S}$  396.1992; Found 396.1989.

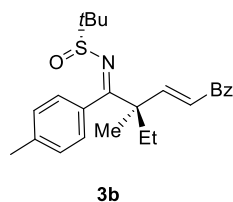

(*R*)-*N*-((*R*,1*Z*,3*E*)-2-ethyl-2-methyl-5-oxo-5-phenyl-1-(*p*-tolyl)pent-3-en-1-ylidene)-2-methylpropane-2-sulfonamide (**3b**): According to the general procedure A, reaction was performed using enesulfonamide **1b** (28.1 mg, 0.102 mmol, 1.0 equiv), *t*BuOK in THF (1.0 M, 125  $\mu\text{L}$ , 0.122 mmol, 1.2 equiv), **2a** (27.0 mg, 0.153 mmol, 1.5 equiv), DBU (60.9 mg, 0.408 mmol, 4.0 equiv). Column chromatography (25% ethyl acetate/petroleum ether as eluent) afforded **3b** as a light yellow oil (37.9 mg, 92%). Diastereomeric ratio was determined by  $^1\text{H}$  NMR analysis of the crude reaction mixture (dr > 20:1). Analytical data for **3b**:  $R_f = 0.30$  (petroleum ether/ethyl acetate = 3/1);  $[\alpha]_D^{25} = -106.6$  (c 0.2,  $\text{CH}_2\text{Cl}_2$ );  $^1\text{H}$  NMR (400 MHz,  $\text{CDCl}_3$ )  $\delta$  7.89–7.83 (m, 2H), 7.59–7.52 (m, 1H), 7.49–7.42 (m, 2H), 7.20–7.14 (m, 2H), 7.09 (d,  $J = 16.0$  Hz, 1H), 7.02–6.96 (m, 2H), 6.84 (d,  $J = 15.6$  Hz, 1H), 2.35 (s, 3H), 1.95–1.74 (m, 2H), 1.39 (s, 3H), 1.20 (s, 9H), 0.94 (t,  $J = 7.4$  Hz, 3H);  $^{13}\text{C}\{^1\text{H}\}$  NMR (100 MHz,  $\text{CDCl}_3$ )  $\delta$  190.7, 188.5, 152.5, 139.0, 137.8, 133.7, 132.9, 128.73, 128.69, 128.68, 126.6, 125.4, 56.4, 52.7, 31.3, 22.3, 21.5, 21.1, 9.1; HRMS (ESI-Orbitrap)  $m/z$ :  $[\text{M} + \text{H}]^+$  Calcd for  $\text{C}_{25}\text{H}_{32}\text{NO}_2\text{S}$  410.2148; Found 410.2144.

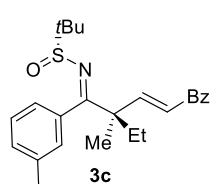

(*R*)-*N*-((*R*,1*Z*,3*E*)-2-ethyl-2-methyl-5-oxo-5-phenyl-1-(*m*-tolyl)pent-3-en-1-ylidene)-2-methylpropane-2-sulfonamide (**3c**): According to the general procedure A, reaction was performed using enesulfonamide **1c** (27.9 mg, 0.100 mmol, 1.0 equiv), *t*BuOK in THF (1.0 M, 120  $\mu\text{L}$ , 0.120 mmol, 1.2 equiv), **2a** (26.6 mg, 0.150 mmol, 1.5 equiv). Column chromatography (25% ethyl acetate/petroleum ether as eluent) afforded as a brown oil (40.1 mg, 98%). Diastereomeric ratio was determined by  $^1\text{H}$  NMR analysis of the crude reaction mixture (dr = 20:1). Analytical data for **3c**:  $R_f = 0.30$  (petroleum ether/ethyl acetate = 3/1);  $[\alpha]_D^{25} = -75.2$  (c 0.25,  $\text{CH}_2\text{Cl}_2$ );  $^1\text{H}$  NMR (400 MHz,  $\text{CDCl}_3$ )  $\delta$  7.84 (d,  $J = 8.0$  Hz, 2H), 7.57–7.50 (m, 1H), 7.47–7.39 (m, 2H), 7.26–7.20 (m, 1H), 7.19–7.14 (m, 1H), 7.07 (d,  $J = 15.6$  Hz, 1H), 6.91–6.77 (m, 3H), 2.32 (s, 3H), 1.94–1.73 (m, 2H), 1.38 (s, 3H), 1.19 (s, 9H), 0.92 (t,  $J = 7.4$  Hz, 3H);  $^{13}\text{C}\{^1\text{H}\}$  NMR (100 MHz,  $\text{CDCl}_3$ )  $\delta$  190.8, 188.6, 152.4, 137.8, 137.7, 136.6, 132.9, 129.8, 128.65, 128.64, 127.9, 127.0, 125.5, 123.8, 56.3, 52.5, 31.3, 22.2, 21.7, 21.1, 9.1; HRMS (ESI-Orbitrap)  $m/z$ :  $[\text{M} + \text{H}]^+$  Calcd for  $\text{C}_{25}\text{H}_{32}\text{NO}_2\text{S}$  410.2148; Found 410.2144.

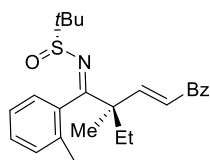

**3d**

(*R*)-*N*-((*R*,1*Z*,3*E*)-2-ethyl-2-methyl-5-oxo-5-phenyl-1-(*o*-tolyl)pent-3-en-1-ylidene)-2-methylpropane-2-sulfonamide (**3d**): According to the general procedure A, reaction was performed using enesulfonamide **1d** (27.9 mg, 0.100 mmol, 1.0 equiv), *t*BuOK in THF (1.0 M, 120  $\mu$ L, 0.120 mmol, 1.2 equiv), **2a** (26.6 mg, 0.150 mmol, 1.5 equiv). Column chromatography (25% ethyl acetate/petroleum ether as eluent) afforded **3d** as a light yellow oil (38.1 mg, 93%). Diastereomeric ratio was determined by HPLC analysis of the crude reaction mixture (dr = 90:10), HPLC (IA-3, *n*-hexane/*i*PrOH = 90/10, flow rate = 1.0 mL/min,  $\lambda$  = 254 nm)  $t_R$  = 7.8 min (major), 8.7 min (minor). Analytical data for **3d** (mixture of imino *Z/E* isomers):  $R_f$  = 0.30 (petroleum ether/ethyl acetate = 3/1);  $[\alpha]_D^{25} = -224.9$  (*c* 0.10, CH<sub>2</sub>Cl<sub>2</sub>); <sup>1</sup>H NMR (400 MHz, CDCl<sub>3</sub>)  $\delta$  7.87–7.73 (m, 2H), 7.61–7.51 (m, 1H), 7.48–7.39 (m, 2H), 7.30–7.26 (m, 1H), 7.23–7.01 (m, 3H), 6.93–6.74 (m, 2H), 2.21 (d,  $J$  = 36.0 Hz, 3H), 2.00–1.86 (m, 2H), 1.38 (s, 3H), 1.22 (d,  $J$  = 20.8 Hz, 9H), 0.97–0.90 (m, 3H); <sup>13</sup>C{<sup>1</sup>H} NMR (100 MHz, CDCl<sub>3</sub>)  $\delta$  191.1, 190.6, 189.9, 188.2, 152.6, 137.8, 137.7, 137.4, 136.3, 134.7, 132.92, 132.86, 132.7, 130.6, 130.2, 129.0, 128.9, 128.69, 128.67, 128.65, 128.6, 127.0, 125.7, 125.66, 125.64, 125.34, 125.25, 125.1, 56.6, 56.4, 53.1, 52.6, 32.1, 31.8, 22.4, 22.2, 21.31, 21.28, 20.4, 19.5, 9.1, 8.9; HRMS (ESI-Orbitrap)  $m/z$ : [M + H]<sup>+</sup> Calcd for C<sub>25</sub>H<sub>32</sub>NO<sub>2</sub>S 410.2148; Found 410.2146.

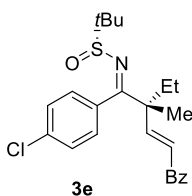

**3e**

(*R*)-*N*-((*R*,1*Z*,3*E*)-1-(4-chlorophenyl)-2-ethyl-2-methyl-5-oxo-5-phenylpent-3-en-1-ylidene)-2-methylpropane-2-sulfonamide (**3e**): According to the general procedure A, reaction was performed using enesulfonamide **1e** (30.0 mg, 0.101 mmol, 1.0 equiv), *t*BuOK in THF (1.0 M, 120  $\mu$ L, 0.120 mmol, 1.2 equiv), **2a** (26.6 mg, 0.150 mmol, 1.5 equiv). Column chromatography (25% ethyl acetate/petroleum ether as eluent) afforded **3e** as a light yellow oil (40.8 mg, 95%). Diastereomeric ratio was determined by <sup>1</sup>H NMR analysis of the crude reaction mixture (dr > 20:1). Analytical data for **3e**:  $R_f$  = 0.30 (petroleum ether/ethyl acetate = 3/1);  $[\alpha]_D^{25} = -102.1$  (*c* 0.22, CH<sub>2</sub>Cl<sub>2</sub>); <sup>1</sup>H NMR (400 MHz, CDCl<sub>3</sub>)  $\delta$  7.89–7.84 (m, 2H), 7.60–7.54 (m, 1H), 7.50–7.43 (m, 2H), 7.37–7.32 (m, 2H), 7.09–7.02 (m, 3H), 6.85 (d,  $J$  = 16.0 Hz, 1H), 1.92–1.75 (m, 2H), 1.38 (s, 3H), 1.22 (s, 9H), 0.94 (t,  $J$  = 7.4 Hz, 3H); <sup>13</sup>C{<sup>1</sup>H} NMR (100 MHz, CDCl<sub>3</sub>)  $\delta$  190.4, 186.3, 151.8, 137.7, 135.2, 134.8, 133.1, 128.8, 128.7, 128.3, 128.1, 125.5, 56.9, 52.7, 31.2, 22.4, 21.0, 9.1; HRMS (ESI-Orbitrap)  $m/z$ : [M + H]<sup>+</sup> Calcd for C<sub>24</sub>H<sub>29</sub>ClNO<sub>2</sub>S 430.1602; Found 430.1595.

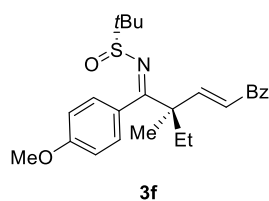

(*R*)-*N*-((*R*,1*Z*,3*E*)-2-ethyl-1-(4-methoxyphenyl)-2-methyl-5-oxo-5-

phenylpent-3-en-1-ylidene)-2-methylpropane-2-sulfonamide (**3f**):

According to the general procedure A, reaction was performed using

enesulfonamide **1f** (29.6 mg, 0.101 mmol, 1.0 equiv), *t*BuOK in THF (1.0

M, 120  $\mu$ L, 0.120 mmol, 1.2 equiv), **2a** (26.6 mg, 0.150 mmol, 1.5 equiv). Column chromatography

(30% ethyl acetate/petroleum ether as eluent) afforded **3f** as a light yellow oil (37.9 mg, 89%).

Diastereomeric ratio was determined by  $^1\text{H}$  NMR analysis of the crude reaction mixture (dr > 20:1).

Analytical data for **3f**:  $R_f$  = 0.25 (petroleum ether/ethyl acetate = 3/1);  $[\alpha]_D^{25} = -104.8$  (*c* 0.13,

$\text{CH}_2\text{Cl}_2$ );  $^1\text{H}$  NMR (400 MHz,  $\text{CDCl}_3$ )  $\delta$  7.89–7.84 (m, 2H), 7.60–7.52 (m, 1H), 7.50–7.42 (m, 2H),

7.14–7.02 (m, 3H), 6.91–6.82 (m, 3H), 3.81 (s, 3H), 1.93–1.76 (m, 2H), 1.40 (s, 3H), 1.21 (s, 9H),

0.93 (t,  $J$  = 7.4 Hz, 3H);  $^{13}\text{C}\{^1\text{H}\}$  NMR (100 MHz,  $\text{CDCl}_3$ )  $\delta$  190.7, 188.5, 159.9, 152.7, 137.8,

133.0, 128.9, 128.73, 128.72, 128.3, 125.3, 113.5, 56.3, 55.3, 52.8, 31.3, 22.3, 21.3, 9.1; HRMS

(ESI-Orbitrap)  $m/z$ :  $[\text{M} + \text{H}]^+$  Calcd for  $\text{C}_{25}\text{H}_{32}\text{NO}_3\text{S}$  426.2097; Found 426.2093.

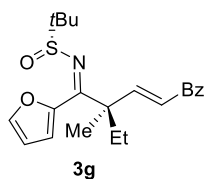

(*R*)-*N*-((*R*,1*Z*,3*E*)-2-ethyl-1-(furan-2-yl)-2-methyl-5-oxo-5-phenylpent-3-

en-1-ylidene)-2-methylpropane-2-sulfonamide (**3g**): According to the general

procedure A, reaction was performed using enesulfonamide **1g** (25.6 mg, 0.101

mmol, 1.0 equiv), *t*BuOK in THF (1.0 M, 120  $\mu$ L, 0.120 mmol, 1.2 equiv), **2a**

(26.6 mg, 0.150 mmol, 1.5 equiv). Column chromatography (25% ethyl acetate/petroleum ether as

eluent) afforded **3g** as a light yellow oil (36.2 mg, 94%). Diastereomeric ratio was determined by

HPLC analysis of the crude reaction mixture (dr = 98:2), HPLC (AD-3, *n*-hexane/*i*PrOH = 97/03,

flow rate = 1.0 mL/min,  $\lambda$  = 254 nm)  $t_R$  = 33.8 min (major), 37.5 min (minor). Analytical data for

**3g**:  $R_f$  = 0.30 (petroleum ether/ethyl acetate = 3/1);  $[\alpha]_D^{25} = -156.2$  (*c* 0.16,  $\text{CH}_2\text{Cl}_2$ );  $^1\text{H}$  NMR (400

MHz,  $\text{CDCl}_3$ )  $\delta$  7.86–7.80 (m, 2H), 7.56–7.48 (m, 2H), 7.46–7.39 (m, 2H), 7.25–7.20 (m, 2H), 6.80

(d,  $J$  = 15.6 Hz, 1H), 6.51–6.46 (m, 1H), 2.05–1.86 (m, 2H), 1.46 (s, 3H), 1.26 (s, 9H), 0.88 (t,  $J$  =

7.6 Hz, 3H);  $^{13}\text{C}\{^1\text{H}\}$  NMR (100 MHz,  $\text{CDCl}_3$ )  $\delta$  191.0, 174.2, 153.2, 147.0, 144.5, 137.9, 132.9,

128.68, 128.67, 124.6, 119.5, 111.9, 57.2, 52.4, 31.6, 22.8, 22.4, 9.0; HRMS (ESI-Orbitrap)  $m/z$ :

$[\text{M} + \text{H}]^+$  Calcd for  $\text{C}_{22}\text{H}_{28}\text{NO}_3\text{S}$  386.1784; Found 386.1780.

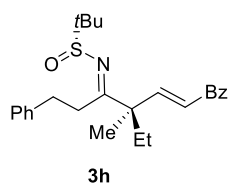

(*R*)-*N*-((*R*,3*E*,5*E*)-4-ethyl-4-methyl-7-oxo-1,7-diphenylhept-5-en-3-

ylidene)-2-methylpropane-2-sulfonamide (**3h**): According to the general procedure B, reaction was performed using enesulfonamide **1h** (29.4 mg, 0.101 mmol, 1.0 equiv), *t*BuOK in THF (1.0 M, 120  $\mu$ L, 0.120 mmol, 1.2 equiv), **2a** (26.6 mg, 0.150 mmol, 1.5 equiv), DBU (61.0 mg, 0.404 mmol, 4.0 equiv). Column chromatography (20% ethyl acetate/petroleum ether as eluent) afforded **3h** as a light yellow oil (31.8 mg, 75%). Diastereomeric ratio was determined by HPLC analysis of the crude reaction mixture (dr = 96:4), HPLC (OD-3, *n*-hexane/*i*PrOH = 97/03, flow rate = 1.0 mL/min,  $\lambda$  = 254 nm)  $t_R$  = 7.0 min (major), 7.5 min (minor). Analytical data for **3h**:  $R_f$  = 0.30 (petroleum ether/ethyl acetate = 4/1);  $[\alpha]_D^{25} = -95.1$  (*c* 0.14, CH<sub>2</sub>Cl<sub>2</sub>); <sup>1</sup>H NMR (400 MHz, CDCl<sub>3</sub>)  $\delta$  7.97–7.89 (m, 2H), 7.63–7.54 (m, 1H), 7.54–7.41 (m, 2H), 7.25–7.20 (m, 4H), 7.20–7.11 (m, 2H), 6.95 (d, *J* = 16.0 Hz, 1H), 3.31–3.19 (m, 1H), 3.13–2.99 (m, 1H), 2.82–2.65 (m, 2H), 1.97–1.84 (m, 1H), 1.84–1.73 (m, 1H), 1.38 (s, 3H), 1.31 (s, 9H), 0.91 (t, *J* = 7.4 Hz, 3H); <sup>13</sup>C{<sup>1</sup>H} NMR (100 MHz, CDCl<sub>3</sub>)  $\delta$  190.3, 186.4, 152.3, 140.7, 137.8, 133.1, 128.8, 128.65, 128.56, 126.4, 125.1, 57.8, 53.5, 34.9, 33.7, 31.0, 22.9, 20.8, 9.1; HRMS (ESI-Orbitrap) *m/z*: [M + H]<sup>+</sup> Calcd for C<sub>26</sub>H<sub>34</sub>NO<sub>2</sub>S 424.2305; Found 424.2300.

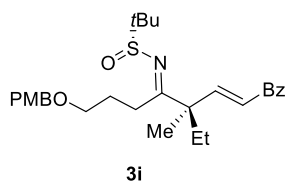

(*R*)-*N*-((*R*,4*E*,6*E*)-5-ethyl-1-((4-methoxybenzyl)oxy)-5-methyl-8-

oxo-8-phenyloct-6-en-4-ylidene)-2-methylpropane-2-sulfonamide (**3i**): According to the general procedure B, reaction was performed using enesulfonamide **1i** (36.8 mg, 0.101 mmol, 1.0 equiv), *t*BuOK in THF (1.0 M, 120  $\mu$ L, 0.120 mmol, 1.2 equiv), **2a** (26.6 mg, 0.150 mmol, 1.5 equiv), DBU (61.0 mg, 0.404 mmol, 4.0 equiv). Column chromatography (20% ethyl acetate/petroleum ether as eluent) afforded **3i** as a light yellow oil (33.8 mg, 68%). Diastereomeric ratio was determined by HPLC analysis of the crude reaction mixture (dr = 93:7), HPLC (ID-3, *n*-hexane/*i*PrOH = 90/10, flow rate = 1.0 mL/min,  $\lambda$  = 254 nm)  $t_R$  = 34.5 min (major), 38.8 min (minor). Analytical data for **3i**:  $R_f$  = 0.30 (petroleum ether/ethyl acetate = 4/1);  $[\alpha]_D^{25} = -131.8$  (*c* 0.08, CH<sub>2</sub>Cl<sub>2</sub>); <sup>1</sup>H NMR (400 MHz, CDCl<sub>3</sub>)  $\delta$  7.95–7.88 (m, 2H), 7.61–7.52 (m, 1H), 7.46 (t, *J* = 7.6 Hz, 2H), 7.22–7.16 (m, 2H), 7.11 (d, *J* = 16.0 Hz, 1H), 6.90 (d, *J* = 15.6 Hz, 1H), 6.85–6.78 (m, 2H), 4.38 (s, 2H), 3.77 (s, 3H), 3.51–3.40 (m, 2H), 2.98–2.88 (m, 1H), 2.64–2.52 (m, 1H), 2.07–1.76 (m, 4H), 1.34 (s, 3H), 1.25 (s, 9H), 0.87 (t, *J* = 7.4 Hz, 3H); <sup>13</sup>C{<sup>1</sup>H} NMR (100 MHz, CDCl<sub>3</sub>)  $\delta$  190.4, 187.9, 159.2, 152.7, 137.9, 133.0,

130.6, 129.3, 128.7, 128.6, 124.9, 113.8, 72.5, 69.7, 57.4, 55.3, 53.4, 30.9, 29.6, 28.3, 22.7, 20.9, 9.1; HRMS (ESI-Orbitrap)  $m/z$ :  $[M + H]^+$  Calcd for  $C_{29}H_{40}NO_4S$  498.2673; Found 498.2663.

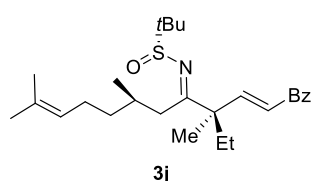

(*R*)-*N*-((*2E,4R,5E,7R*)-4-ethyl-4,7,11-trimethyl-1-oxo-1-phenyldodeca-2,10-dien-5-ylidene)-2-methylpropane-2-sulfonamide

**(3j)**: According to the general procedure B, reaction was performed using enesulfonamide **1j** (31.3 mg, 0.101 mmol, 1.0 equiv), *t*BuOK in

THF (1.0 M, 120  $\mu$ L, 0.120 mmol, 1.2 equiv), **2a** (26.6 mg, 0.150 mmol, 1.5 equiv), DBU (62.0 mg, 0.411 mmol, 4.0 equiv). Column chromatography (20% ethyl acetate/petroleum ether as eluent) afforded **3j** as a light yellow oil (40.8 mg, 92%). Diastereomeric ratio was determined by HPLC analysis of the crude reaction mixture (dr = 97:3), HPLC (ID-3, *n*-hexane/*i*PrOH = 95/05, flow rate = 1.0 mL/min,  $\lambda$  = 254 nm)  $t_R$  = 14.0 min (minor), 14.4 min (major). Analytical data for **3j**:  $R_f$  = 0.30 (petroleum ether/ethyl acetate = 5/1);  $[\alpha]_D^{25}$  = -144.7 (*c* 0.22,  $CH_2Cl_2$ );  $^1H$  NMR (400 MHz,  $CDCl_3$ )  $\delta$  7.97–7.86 (m, 2H), 7.59–7.52 (m, 1H), 7.51–7.42 (m, 2H), 7.14 (d,  $J$  = 16.0 Hz, 1H), 6.91 (d,  $J$  = 15.6 Hz, 1H), 5.08–4.91 (m, 1H), 3.17–3.07 (m, 1H), 2.50–2.36 (m, 1H), 2.13–1.69 (m, 6H), 1.58 (s, 3H), 1.52 (s, 3H), 1.36 (s, 3H), 1.25 (s, 9H), 1.22–1.14 (m, 1H), 0.95 (d,  $J$  = 6.4 Hz, 3H), 0.87 (t,  $J$  = 7.4 Hz, 3H);  $^{13}C\{^1H\}$  NMR (100 MHz,  $CDCl_3$ )  $\delta$  190.1, 188.5, 153.2, 137.9, 133.0, 131.6, 128.7, 128.6, 124.6, 124.3, 57.4, 53.2, 39.2, 37.6, 32.1, 31.8, 25.73, 25.72, 22.7, 21.3, 19.7, 17.8, 9.0; HRMS (ESI-Orbitrap)  $m/z$ :  $[M + H]^+$  Calcd for  $C_{27}H_{42}NO_2S$  444.2931; Found 444.2921.

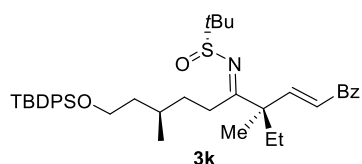

(*R*)-*N*-((*2E,4R,5E,8R*)-10-((tert-butyldiphenylsilyl)oxy)-4-ethyl-4,8-dimethyl-1-oxo-1-phenyldec-2-en-5-ylidene)-2-

methylpropane-2-sulfonamide (**3k**): According to the general

procedure B, reaction was performed using enesulfonamide **1k** (26.5 mg, 0.051 mmol, 1.0 equiv), *t*BuOK in THF (1.0 M, 60  $\mu$ L, 0.060 mmol, 1.2 equiv), **2a** (13.4 mg, 0.0751 mmol, 1.5 equiv), DBU (31.0 mg, 0.205 mmol, 4.0 equiv). Column chromatography (15% ethyl acetate/petroleum ether as eluent) afforded **3k** as a light yellow oil (22.7 mg, 69%). Diastereomeric ratio was determined by HPLC analysis of the crude reaction mixture (dr = 95:5), HPLC (ID-3, *n*-hexane/*i*PrOH = 90/10, flow rate = 1.0 mL/min,  $\lambda$  = 254 nm)  $t_R$  = 7.1 min (major), 7.7 min (minor). Analytical data for **3k**:  $R_f$  = 0.30 (petroleum ether/ethyl acetate = 5/1);  $[\alpha]_D^{25}$  = -83.1 (*c* 0.21,  $CH_2Cl_2$ );  $^1H$  NMR (400 MHz,  $CDCl_3$ )  $\delta$  7.96–7.87 (m, 2H), 7.70–7.60 (m, 4H), 7.59–7.53 (m, 1H), 7.51–7.43 (m, 2H), 7.43–7.33 (m, 6H), 7.10 (d,  $J$  = 15.6 Hz, 1H) (7.16), 6.90 (d,  $J$  = 16.0 Hz, 1H), 3.75–3.59 (m, 2H), 3.07–2.88

(m, 1H), 2.44–2.33 (m, 1H), 1.94–1.67 (m, 3H), 1.67–1.54 (m, 3H), 1.49–1.38 (m, 1H), 1.34 (s, 3H), 1.25 (s, 9H), 1.02 (s, 9H), 0.92–0.81 (m, 6H);  $^{13}\text{C}\{^1\text{H}\}$  NMR (100 MHz,  $\text{CDCl}_3$ )  $\delta$  190.3, 188.7, 152.8, 137.9, 135.7, 134.2, 133.0, 129.6, 128.8, 128.6, 127.7, 124.9, 62.2, 57.3, 53.4, 39.1, 34.4, 31.1, 30.4, 30.2, 27.0, 22.7, 20.8, 19.3, 19.1, 9.1; HRMS (ESI-Orbitrap)  $m/z$ :  $[\text{M} + \text{H}]^+$  Calcd for  $\text{C}_{40}\text{H}_{56}\text{NO}_3\text{SSi}$  658.3745; Found 658.3743.

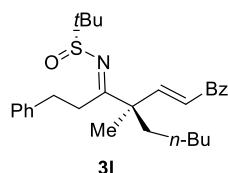

(*R*)-2-methyl-*N*-((*R,E*)-4-methyl-4-((*E*)-3-oxo-3-phenylprop-1-en-1-yl)-1-phenylnonan-3-ylidene)propane-2-sulfonamide (**3l**): According to the general procedure B, reaction was performed using enesulfonamide **1l** (25.5 mg, 0.076 mmol, 1.0 equiv), *t*BuOK in THF (1.0 M, 90  $\mu\text{L}$ , 0.091 mmol, 1.2 equiv), **2a** (20.0 mg, 0.113 mmol, 1.5 equiv), DBU (46.3 mg, 0.304 mmol, 4.0 equiv). Column chromatography (15% ethyl acetate/petroleum ether as eluent) afforded **3l** as a light yellow oil (30.5 mg, 86%). Diastereomeric ratio was determined by  $^1\text{H}$  NMR analysis of the crude reaction mixture (dr > 20:1). Analytical data for **3l**:  $R_f$  = 0.30 (petroleum ether/ethyl acetate = 5/1);  $[\alpha]_D^{25}$  =  $-80.6$  (c 0.20,  $\text{CH}_2\text{Cl}_2$ );  $^1\text{H}$  NMR (400 MHz,  $\text{CDCl}_3$ )  $\delta$  7.97–7.91 (m, 2H), 7.62–7.55 (m, 1H), 7.53–7.45 (m, 2H), 7.27–7.13 (m, 6H), 6.95 (d,  $J$  = 15.6 Hz, 1H), 3.32–3.15 (m, 1H), 3.10–2.99 (m, 1H), 2.80–2.65 (m, 2H), 1.92–1.78 (m, 1H), 1.76–1.64 (m, 1H), 1.39 (s, 3H), 1.37–1.15 (m, 15H), 0.88 (t,  $J$  = 6.8 Hz, 3H);  $^{13}\text{C}\{^1\text{H}\}$  NMR (100 MHz,  $\text{CDCl}_3$ )  $\delta$  190.3, 186.4, 152.6, 140.7, 137.8, 133.1, 128.8, 128.64, 128.62, 128.56, 126.4, 124.8, 57.8, 53.2, 38.4, 34.9, 33.7, 32.5, 24.3, 22.8, 22.6, 21.4, 14.1; HRMS (ESI-Orbitrap)  $m/z$ :  $[\text{M} + \text{H}]^+$  Calcd for  $\text{C}_{29}\text{H}_{40}\text{NO}_2\text{S}$  466.2774; Found 466.2766.

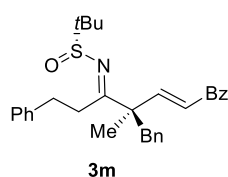

(*R*)-*N*-((*R,3E,5E*)-4-benzyl-4-methyl-7-oxo-1,7-diphenylhept-5-en-3-ylidene)-2-methylpropane-2-sulfonamide (**3m**): According to the general procedure B, reaction was performed using enesulfonamide **1m** (35.5 mg, 0.100 mmol, 1.0 equiv), *t*BuOK in THF (1.0 M, 120  $\mu\text{L}$ , 0.120 mmol, 1.2 equiv), **2a** (26.7 mg, 0.150 mmol, 1.5 equiv), DBU (60.9 mg, 0.401 mmol, 4.0 equiv). Column chromatography (15% ethyl acetate/petroleum ether as eluent) afforded **3m** as a light yellow oil (43.7 mg, 90%). Diastereomeric ratio was determined by  $^1\text{H}$  NMR analysis of the crude reaction mixture (dr > 20:1). Analytical data for **3m**:  $R_f$  = 0.30 (petroleum ether/ethyl acetate = 5/1);  $[\alpha]_D^{25}$  =  $-150.1$  (c 0.23,  $\text{CH}_2\text{Cl}_2$ );  $^1\text{H}$  NMR (400 MHz,  $\text{CDCl}_3$ )  $\delta$  7.92–7.87 (m, 2H), 7.62–7.56 (m, 1H), 7.51–7.45 (m, 2H), 7.34–7.26 (m, 3H), 7.25–7.13 (m, 6H), 7.12–7.07 (m, 2H), 6.87 (d,  $J$  = 15.6 Hz, 1H), 3.43–3.32 (m, 1H), 3.21 (d,  $J$  = 13.6 Hz, 1H), 3.16–3.06 (m, 1H), 3.03 (d,  $J$  = 13.6 Hz, 1H),

2.89–2.66 (m, 2H), 1.35 (s, 3H), 1.22 (s, 9H);  $^{13}\text{C}\{^1\text{H}\}$  NMR (100 MHz,  $\text{CDCl}_3$ )  $\delta$  190.0, 185.4, 151.5, 140.6, 137.7, 136.4, 133.1, 130.7, 128.8, 128.7, 128.6, 128.3, 126.9, 126.4, 125.6, 58.0, 54.1, 44.7, 35.3, 33.6, 22.8, 20.9; HRMS (ESI-Orbitrap)  $m/z$ :  $[\text{M} + \text{H}]^+$  Calcd for  $\text{C}_{31}\text{H}_{36}\text{NO}_2\text{S}$  486.2461; Found 486.2453.

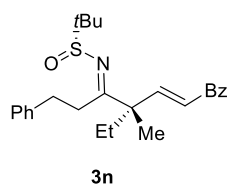

(*R*)-*N*-((*S*,3*E*,5*E*)-4-ethyl-4-methyl-7-oxo-1,7-diphenylhept-5-en-3-ylidene)-2-methylpropane-2-sulfonamide (**3n**): According to the general procedure B, reaction was performed using enesulfonamide **1n** (29.5 mg, 0.102 mmol, 1.0 equiv), *t*BuOK in THF (1.0 M, 120  $\mu\text{L}$ , 0.120 mmol, 1.2 equiv), **2a** (26.8 mg, 0.151 mmol, 1.5 equiv), DBU (60.9 mg, 0.401 mmol, 4.0 equiv). Column chromatography (15% ethyl acetate/petroleum ether as eluent) afforded **3n** as a light yellow oil (36.4 mg, 86%). Diastereomeric ratio was determined by HPLC analysis of the crude reaction mixture (dr = 94.5:5.5), HPLC (OD-3, *n*-hexane/*i*PrOH = 97/03, flow rate = 1.0 mL/min,  $\lambda$  = 254 nm)  $t_{\text{R}}$  = 7.0 min (minor), 7.5 min (major). Analytical data for **3n**:  $R_f$  = 0.30 (petroleum ether/ethyl acetate = 5/1);  $[\alpha]_{\text{D}}^{25} = -143.9$  (*c* 0.205,  $\text{CH}_2\text{Cl}_2$ );  $^1\text{H}$  NMR (400 MHz,  $\text{CDCl}_3$ )  $\delta$  7.98–7.90 (m, 2H), 7.62–7.54 (m, 1H), 7.48 (t,  $J$  = 7.4 Hz, 2H), 7.26–7.11 (m, 6H), 6.95 (d,  $J$  = 16.0 Hz, 1H), 3.23–3.12 (m, 1H), 3.07–2.97 (m, 1H), 2.86–2.67 (m, 2H), 1.86 (q,  $J$  = 7.6 Hz, 2H), 1.39 (s, 3H), 1.31 (s, 9H), 0.91 (t,  $J$  = 7.4 Hz, 3H);  $^{13}\text{C}\{^1\text{H}\}$  NMR (100 MHz,  $\text{CDCl}_3$ )  $\delta$  190.3, 186.8, 152.3, 140.7, 137.8, 133.1, 128.8, 128.64, 128.62, 128.5, 126.4, 125.1, 57.7, 53.5, 35.2, 34.0, 31.1, 22.8, 21.2, 9.1; HRMS (ESI-Orbitrap)  $m/z$ :  $[\text{M} + \text{H}]^+$  Calcd for  $\text{C}_{26}\text{H}_{34}\text{NO}_2\text{S}$  424.2305; Found 424.2298.

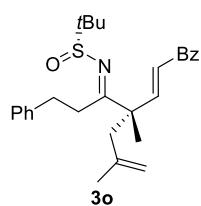

(*R*)-2-methyl-*N*-((*S*,3*E*,5*E*)-4-methyl-4-(2-methylallyl)-7-oxo-1,7-diphenylhept-5-en-3-ylidene)propane-2-sulfonamide (**3o**): According to the general procedure B, reaction was performed using enesulfonamide **1o** (32.0 mg, 0.101 mmol, 1.0 equiv), *t*BuOK in THF (1.0 M, 120  $\mu\text{L}$ , 0.120 mmol, 1.2 equiv), **2a** (26.8 mg, 0.151 mmol, 1.5 equiv), DBU (60.9 mg, 0.401 mmol, 4.0 equiv). Column chromatography (15% ethyl acetate/petroleum ether as eluent) afforded **3o** as a light yellow solid (32.3 mg, 72%). Diastereomeric ratio was determined by HPLC analysis of the crude reaction mixture (dr = 99:1), HPLC (AD-3, *n*-hexane/*i*PrOH = 90/10, flow rate = 1.0 mL/min,  $\lambda$  = 254 nm)  $t_{\text{R}}$  = 6.8 min (major), 7.5 min (minor). Analytical data for **3o**:  $R_f$  = 0.30 (petroleum ether/ethyl acetate = 5/1); mp 87–88  $^{\circ}\text{C}$ ;  $[\alpha]_{\text{D}}^{25} = -75.9$  (*c* 0.17,  $\text{CH}_2\text{Cl}_2$ );  $^1\text{H}$  NMR (400 MHz,  $\text{CDCl}_3$ )  $\delta$  7.99–7.91 (m, 2H), 7.62–7.56 (m, 1H), 7.53–7.46 (m, 2H), 7.32 (d,  $J$  = 15.6 Hz, 1H), 7.25–7.21 (m, 4H), 7.20–

7.13 (m, 1H), 6.97 (d,  $J = 16.0$  Hz, 1H), 4.94–4.87 (m, 1H), 4.73 (s, 1H), 3.25–3.11 (m, 1H), 3.06–2.92 (m, 1H), 2.89–2.74 (m, 2H), 2.67–2.48 (m, 2H), 1.70 (s, 3H), 1.45 (s, 3H), 1.31 (s, 9H);  $^{13}\text{C}\{^1\text{H}\}$  NMR (100 MHz,  $\text{CDCl}_3$ )  $\delta$  190.1, 186.5, 152.4, 141.3, 140.7, 137.8, 133.1, 128.79, 128.67, 128.62, 128.56, 126.4, 124.8, 116.2, 57.8, 53.0, 47.0, 35.7, 34.4, 24.8, 22.9, 21.9; HRMS (ESI-Orbitrap)  $m/z$ :  $[\text{M} + \text{H}]^+$  Calcd for  $\text{C}_{28}\text{H}_{36}\text{NO}_2\text{S}$  450.2461; Found 450.2452.

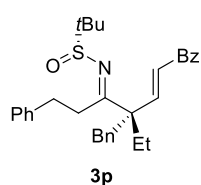

(*R*)-*N*-((*S*,3*E*,5*E*)-4-benzyl-4-ethyl-7-oxo-1,7-diphenylhept-5-en-3-ylidene)-2-methylpropane-2-sulfinamide (**3p**): According to the general procedure B, reaction was performed using enesulfinamide **1p** (36.9 mg, 0.100 mmol, 1.0 equiv), *t*BuOK in THF (1.0 M, 120  $\mu\text{L}$ , 0.120 mmol, 1.2 equiv), **2a** (26.8 mg, 0.151 mmol, 1.5 equiv), DBU (60.9 mg, 0.401 mmol, 4.0 equiv). Column chromatography (15% ethyl acetate/petroleum ether as eluent) afforded **3p** as a light yellow solid (35.0 mg, 70%). Diastereomeric ratio was determined by  $^1\text{H}$  NMR analysis of the crude reaction mixture (dr > 20:1). Analytical data for **3p**:  $R_f = 0.30$  (petroleum ether/ethyl acetate = 5/1); mp 132–133  $^\circ\text{C}$ ;  $[\alpha]_D^{25} = -73.6$  (*c* 0.19,  $\text{CH}_2\text{Cl}_2$ );  $^1\text{H}$  NMR (400 MHz,  $\text{CDCl}_3$ )  $\delta$  7.89–7.83 (m, 2H), 7.62–7.55 (m, 1H), 7.50–7.44 (m, 2H), 7.25–7.19 (m, 7H), 7.19–7.10 (m, 2H), 7.10–7.04 (m, 2H), 6.85 (d,  $J = 16.0$  Hz, 1H), 3.31–3.03 (m, 4H), 2.77–2.62 (m, 2H), 1.99–1.87 (m, 1H), 1.83–1.71 (m, 1H), 1.31 (s, 9H), 1.01 (t,  $J = 7.4$  Hz, 3H);  $^{13}\text{C}\{^1\text{H}\}$  NMR (100 MHz,  $\text{CDCl}_3$ )  $\delta$  190.0, 185.3, 150.4, 140.7, 137.7, 136.9, 133.1, 130.5, 128.8, 128.62, 128.61, 128.59, 128.2, 126.8, 126.6, 126.4, 58.1, 57.8, 41.0, 35.8, 33.4, 26.0, 22.9, 9.1; HRMS (ESI-Orbitrap)  $m/z$ :  $[\text{M} + \text{H}]^+$  Calcd for  $\text{C}_{32}\text{H}_{38}\text{NO}_2\text{S}$  500.2618; Found 500.2610.

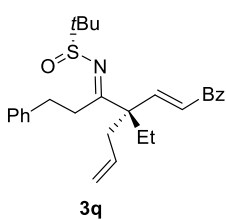

(*R*)-*N*-((*S*,3*E*,5*E*)-4-allyl-4-ethyl-7-oxo-1,7-diphenylhept-5-en-3-ylidene)-2-methylpropane-2-sulfinamide (**3q**): According to the general procedure B, reaction was performed using enesulfinamide **1q** (32.0 mg, 0.101 mmol, 1.0 equiv), *t*BuOK in THF (1.0 M, 120  $\mu\text{L}$ , 0.120 mmol, 1.2 equiv), **2a** (26.8 mg, 0.151 mmol, 1.5 equiv), DBU (60.9 mg, 0.401 mmol, 4.0 equiv). Column chromatography (15% ethyl acetate/petroleum ether as eluent) afforded **3q** as a light yellow oil (39.6 mg, 88%). Diastereomeric ratio was determined by HPLC analysis of the crude reaction mixture (dr = 99:1), HPLC (ID-3, *n*-hexane/*i*PrOH = 90/10, flow rate = 1.0 mL/min,  $\lambda = 254$  nm)  $t_R = 11.4$  min (major), 12.3 min (minor). Analytical data for **3q**:  $R_f = 0.30$  (petroleum ether/ethyl acetate = 5/1);  $[\alpha]_D^{25} = -103.4$  (*c* 0.23,  $\text{CH}_2\text{Cl}_2$ );  $^1\text{H}$  NMR (400 MHz,  $\text{CDCl}_3$ )  $\delta$  7.98–7.90 (m, 2H), 7.63–7.54 (m, 1H), 7.53–



7.44 (m, 2H), 7.24–7.18 (m, 4H), 7.17–7.07 (m, 2H), 6.99 (d,  $J = 16.0$  Hz, 1H), 5.75–5.59 (m, 1H), 5.18–5.07 (m, 2H), 3.26–3.15 (m, 1H), 3.13–3.03 (m, 1H), 2.77–2.53 (m, 4H), 2.03–1.92 (m, 1H), 1.88–1.78 (m, 1H), 1.33 (s, 9H), 0.89 (t,  $J = 7.4$  Hz, 3H);  $^{13}\text{C}\{^1\text{H}\}$  NMR (100 MHz,  $\text{CDCl}_3$ )  $\delta$  190.1, 185.2, 150.7, 140.6, 137.7, 133.4, 133.1, 128.8, 128.65, 128.62, 128.5, 126.4, 126.3, 118.8, 57.8, 56.7, 38.4, 35.2, 33.4, 27.0, 22.9, 8.6; HRMS (ESI-Orbitrap)  $m/z$ :  $[\text{M} + \text{H}]^+$  Calcd for  $\text{C}_{28}\text{H}_{36}\text{NO}_2\text{S}$  450.2461; Found 450.2452.

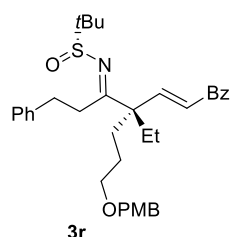

(*R*)-*N*-((*S*,3*E*,5*E*)-4-ethyl-4-(3-((4-methoxybenzyl)oxy)propyl)-1,7-diphenylhept-5-en-3-ylidene)-2-methylpropane-2-sulfinamide (**3r**):

According to the general procedure B, reaction was performed using enesulfinamide **1r** (34.2 mg, 0.075 mmol, 1.0 equiv), *t*BuOK in THF (1.0 M, 90  $\mu\text{L}$ , 0.90 mmol, 1.2 equiv), **2a** (19.8 mg, 0.112 mmol, 1.5 equiv), DBU (45.7 mg, 0.300 mmol, 4.0 equiv). Column chromatography (15% ethyl acetate/petroleum ether as eluent) afforded **3r** as a light yellow oil (35.3 mg, 80%). Diastereomeric ratio was determined by HPLC analysis of the crude reaction mixture ( $dr = 98:2$ ), HPLC (IC-3, *n*-hexane/*i*PrOH = 90/10, flow rate = 1.0 mL/min,  $\lambda = 254$  nm)  $t_{\text{R}} = 20.7$  min (minor), 22.8 min (major). Analytical data for **3r**:  $R_f = 0.30$  (petroleum ether/ethyl acetate = 5/1);  $[\alpha]_{\text{D}}^{25} = -91.9$  ( $c$  0.14,  $\text{CH}_2\text{Cl}_2$ );  $^1\text{H}$  NMR (400 MHz,  $\text{CDCl}_3$ )  $\delta$  7.98–7.90 (m, 2H), 7.62–7.54 (m, 1H), 7.51–7.43 (m, 2H), 7.26–7.19 (m, 6H), 7.19–7.10 (m, 2H), 7.00 (d,  $J = 16.0$  Hz, 1H), 6.89–6.82 (m, 2H), 4.44 (s, 2H), 3.79 (s, 3H), 3.52–3.38 (m, 2H), 3.26–3.01 (m, 2H), 2.83–2.61 (m, 2H), 2.04–1.89 (m, 2H), 1.89–1.77 (m, 2H), 1.57–1.45 (m, 2H), 1.32 (s, 9H), 0.87 (t,  $J = 7.4$  Hz, 3H);  $^{13}\text{C}\{^1\text{H}\}$  NMR (100 MHz,  $\text{CDCl}_3$ )  $\delta$  190.1, 185.7, 159.3, 151.3, 140.7, 133.1, 130.6, 129.3, 128.8, 128.7, 128.66, 128.61, 126.4, 125.9, 113.9, 72.8, 70.1, 57.8, 56.7, 55.4, 35.2, 33.6, 30.5, 27.6, 24.8, 22.9, 8.8; HRMS (ESI-Orbitrap)  $m/z$ :  $[\text{M} + \text{H}]^+$  Calcd for  $\text{C}_{36}\text{H}_{46}\text{NO}_4\text{S}$  588.3142; Found 588.3137.

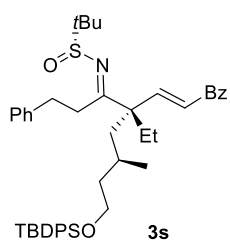

(*R*)-*N*-((4*S*,6*R*,*E*)-8-((tert-butyldiphenylsilyl)oxy)-4-ethyl-6-methyl-4-

((*E*)-3-oxo-3-phenylprop-1-en-1-yl)-1-phenyloctan-3-ylidene)-2-

methylpropane-2-sulfinamide (**3s**): According to the general procedure B, reaction was performed using enesulfinamide **1s** (30.2 mg, 0.051 mmol, 1.0 equiv), *t*BuOK in THF (1.0 M, 60  $\mu\text{L}$ , 0.062 mmol, 1.2 equiv), **2a** (13.3 mg, 0.075 mmol, 1.5 equiv), DBU (31.1 mg, 0.204 mmol, 4.0 equiv). Column chromatography (20%

ethyl acetate/petroleum ether as eluent) afforded **3s** as a light yellow oil (27.5 mg, 75%).

Diastereomeric ratio was determined by HPLC analysis of the crude reaction mixture (dr = 98:2), HPLC (ID-3, *n*-hexane/*i*PrOH = 95/05, flow rate = 1.0 mL/min,  $\lambda = 254$  nm)  $t_R = 10.2$  min (minor), 11.6 min (major). Analytical data for **3s**:  $R_f = 0.30$  (petroleum ether/ethyl acetate = 5/1);  $[\alpha]_D^{25} = -50.5$  (*c* 0.1, CH<sub>2</sub>Cl<sub>2</sub>); <sup>1</sup>H NMR (400 MHz, CDCl<sub>3</sub>)  $\delta$  7.98–7.90 (m, 2H), 7.69–7.60 (m, 4H), 7.60–7.54 (m, 1H), 7.54–7.43 (m, 2H), 7.42–7.30 (m, 6H), 7.28–7.24 (m, 1H), 7.23–7.16 (m, 4H), 7.16–7.10 (m, 1H), 6.98 (d,  $J = 16.0$  Hz, 1H), 3.78–3.57 (m, 2H), 3.28–3.02 (m, 2H), 2.80–2.56 (m, 2H), 2.10–1.98 (m, 1H), 1.96–1.83 (m, 2H), 1.77–1.57 (m, 3H), 1.40–1.35 (m, 1H), 1.31 (s, 9H), 1.02 (s, 9H), 0.87 (t,  $J = 7.4$  Hz, 3H), 0.82 (d,  $J = 6.4$  Hz, 3H); <sup>13</sup>C{<sup>1</sup>H} NMR (100 MHz, CDCl<sub>3</sub>)  $\delta$  190.0, 185.8, 152.2, 140.8, 137.9, 135.6, 134.0, 133.9, 133.1, 129.7, 128.8, 128.61, 128.59, 127.7, 126.3, 125.4, 61.8, 57.8, 57.2, 42.4, 41.7, 35.4, 33.6, 27.2, 27.0, 25.7, 23.0, 21.4, 19.3, 9.1; HRMS (ESI-Orbitrap)  $m/z$ : [M + H]<sup>+</sup> Calcd for C<sub>46</sub>H<sub>60</sub>NO<sub>3</sub>SSi 734.4058; Found 734.4044.

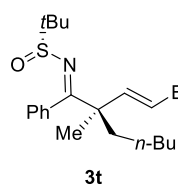

(*R*)-2-methyl-*N*-((*R,Z*)-2-methyl-2-((*E*)-3-oxo-3-phenylprop-1-en-1-yl)-1-phenylheptylidene)propane-2-sulfonamide (**3t**): According to the general procedure A, reaction was performed using enesulfonamide **1t** (30.7 mg, 0.100 mmol, 1.0 equiv), *t*BuOK in THF (1.0 M, 120  $\mu$ L, 0.120 mmol, 1.2 equiv), **2a**

(26.8 mg, 0.151 mmol, 1.5 equiv). Column chromatography (25% ethyl acetate/petroleum ether as eluent) afforded **3t** as a light yellow oil (37.6 mg, 86%). Diastereomeric ratio was determined by <sup>1</sup>H NMR analysis of the crude reaction mixture (dr = 20:1). Analytical data for **3t**:  $R_f = 0.30$  (petroleum ether/ethyl acetate = 4/1);  $[\alpha]_D^{25} = -127.3$  (*c* 0.21, CH<sub>2</sub>Cl<sub>2</sub>); <sup>1</sup>H NMR (400 MHz, CDCl<sub>3</sub>)  $\delta$  7.89–7.84 (m, 2H), 7.59–7.52 (m, 1H), 7.50–7.41 (m, 2H), 7.40–7.33 (m, 3H), 7.15–7.05 (m, 3H), 6.85 (d,  $J = 16.0$  Hz, 1H), 1.87–1.66 (m, 2H), 1.41 (s, 3H), 1.38–1.24 (m, 6H), 1.20 (s, 9H), 0.86 (t,  $J = 7.2$  Hz, 3H); <sup>13</sup>C{<sup>1</sup>H} NMR (100 MHz, CDCl<sub>3</sub>)  $\delta$  190.6, 188.2, 152.6, 137.7, 136.6, 133.0, 129.0, 128.69, 128.68, 128.0, 126.6, 125.1, 56.4, 52.4, 38.5, 32.4, 24.4, 22.6, 22.3, 21.7, 14.1; HRMS (ESI-Orbitrap)  $m/z$ : [M + H]<sup>+</sup> Calcd for C<sub>27</sub>H<sub>36</sub>NO<sub>2</sub>S 438.2461; Found 438.2454.

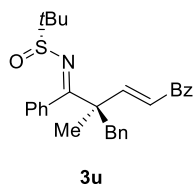

(*R*)-*N*-((*R,1Z,3E*)-2-benzyl-2-methyl-5-oxo-1,5-diphenylpent-3-en-1-ylidene)-2-methylpropane-2-sulfonamide (**3u**): According to the general procedure A, reaction was performed using enesulfonamide **1u** (32.7 mg, 0.100 mmol, 1.0 equiv), *t*BuOK in THF (1.0 M, 120  $\mu$ L, 0.120 mmol, 1.2 equiv), **2a**

(26.8 mg, 0.151 mmol, 1.5 equiv). Diastereomeric ratio was determined by <sup>1</sup>H NMR analysis of the crude reaction mixture (dr > 20:1). Column chromatography (25% ethyl acetate/petroleum ether as

eluent) afforded **3u** as a light brown solid (41.2 mg, 90%). Analytical data for **3u**:  $R_f = 0.30$  (petroleum ether/ethyl acetate = 4/1); mp 135–136 °C;  $[\alpha]_D^{25} = -180.5$  ( $c$  0.14,  $\text{CH}_2\text{Cl}_2$ );  $^1\text{H}$  NMR (400 MHz,  $\text{CDCl}_3$ )  $\delta$  7.81–7.73 (m, 2H), 7.59–7.51 (m, 1H), 7.47–7.40 (m, 2H), 7.40–7.35 (m, 3H), 7.25–7.18 (m, 4H), 7.13–7.02 (m, 4H), 6.63 (d,  $J = 16.0$  Hz, 1H), 3.28 (d,  $J = 13.2$  Hz, 1H), 3.14 (d,  $J = 13.6$  Hz, 1H), 1.31 (s, 3H), 1.26 (s, 9H);  $^{13}\text{C}\{^1\text{H}\}$  NMR (100 MHz,  $\text{CDCl}_3$ )  $\delta$  190.3, 187.6, 151.5, 137.6, 136.64, 136.56, 133.0, 130.9, 129.0, 128.7, 128.6, 128.1, 126.8, 126.6, 126.0, 56.8, 53.2, 45.3, 22.4, 21.2; HRMS (ESI-Orbitrap)  $m/z$ :  $[\text{M} + \text{H}]^+$  Calcd for  $\text{C}_{29}\text{H}_{32}\text{NO}_2\text{S}$  458.2148; Found 458.2137.

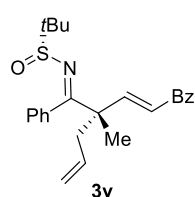

(*R*)-*N*-((*S*,1*Z*,3*E*)-2-allyl-2-methyl-5-oxo-1,5-diphenylpent-3-en-1-ylidene)-2-methylpropane-2-sulfonamide (**3v**): According to the general procedure A, reaction was performed using enesulfonamide **1v** (27.8 mg, 0.101 mmol, 1.0 equiv), *t*BuOK in THF (1.0 M, 120  $\mu\text{L}$ , 0.120 mmol, 1.2 equiv), **2a** (26.8 mg,

0.151 mmol, 1.5 equiv). Column chromatography (20% ethyl acetate/petroleum ether as eluent) afforded **3v** as a light yellow oil (38.3 mg, 94%). Diastereomeric ratio was determined by  $^1\text{H}$  NMR analysis of the crude reaction mixture (dr >20:1). Analytical data for **3v**:  $R_f = 0.30$  (petroleum ether/ethyl acetate = 5/1);  $[\alpha]_D^{25} = -51.1$  ( $c$  0.08,  $\text{CH}_2\text{Cl}_2$ );  $^1\text{H}$  NMR (400 MHz,  $\text{CDCl}_3$ )  $\delta$  7.88–7.82 (m, 2H), 7.61–7.53 (m, 1H), 7.49–7.42 (m, 2H), 7.41–7.33 (m, 3H), 7.14–7.04 (m, 3H), 6.82 (d,  $J = 15.6$  Hz, 1H), 5.85–5.69 (m, 1H), 5.21–5.06 (m, 2H), 2.66 (d,  $J = 7.2$  Hz, 2H), 1.36 (s, 3H), 1.22 (s, 9H);  $^{13}\text{C}\{^1\text{H}\}$  NMR (100 MHz,  $\text{CDCl}_3$ )  $\delta$  190.4, 187.6, 151.5, 137.7, 136.4, 133.3, 133.1, 129.1, 128.73, 128.68, 128.1, 126.7, 125.8, 119.3, 56.5, 52.0, 42.9, 22.3, 21.7; HRMS (ESI-Orbitrap)  $m/z$ :  $[\text{M} + \text{H}]^+$  Calcd for  $\text{C}_{25}\text{H}_{30}\text{NO}_2\text{S}$  408.1992; Found 408.1985.

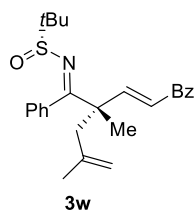

(*R*)-2-methyl-*N*-((*S*,1*Z*,3*E*)-2-methyl-2-(2-methylallyl)-5-oxo-1,5-diphenylpent-3-en-1-ylidene)propane-2-sulfonamide (**3w**): According to the general procedure A, reaction was performed using enesulfonamide **1w** (29.2 mg, 0.101 mmol, 1.0 equiv), *t*BuOK in THF (1.0 M, 120  $\mu\text{L}$ , 0.120 mmol, 1.2 equiv), **2a**

(26.8 mg, 0.151 mmol, 1.5 equiv). Column chromatography (20% ethyl acetate/petroleum ether as eluent) afforded **3w** as a light yellow oil (38.8 mg, 92%). Diastereomeric ratio was determined by  $^1\text{H}$  NMR analysis of the crude reaction mixture (dr > 20:1). Analytical data for **3w**:  $R_f = 0.30$  (petroleum ether/ethyl acetate = 4/1);  $[\alpha]_D^{25} = -174.2$  ( $c$  0.15,  $\text{CH}_2\text{Cl}_2$ );  $^1\text{H}$  NMR (400 MHz,  $\text{CDCl}_3$ )  $\delta$  7.90–7.82 (m, 2H), 7.60–7.53 (m, 1H), 7.51–7.42 (m, 2H), 7.42–7.33 (m, 3H), 7.19 (d,  $J = 15.6$

Hz, 1H), 7.14–7.05 (m, 2H), 6.82 (d,  $J = 15.6$  Hz, 1H), 4.93–4.89 (m, 1H), 4.79–4.74 (m, 1H), 2.69 (s, 2H), 1.71 (s, 3H), 1.38 (s, 3H), 1.22 (s, 9H);  $^{13}\text{C}\{^1\text{H}\}$  NMR (100 MHz,  $\text{CDCl}_3$ )  $\delta$  190.3, 188.2, 152.5, 141.5, 137.7, 136.5, 133.1, 129.1, 128.8, 128.7, 128.1, 126.8, 125.4, 116.1, 56.5, 52.2, 46.8, 25.0, 22.3, 21.6; HRMS (ESI-Orbitrap)  $m/z$ :  $[\text{M} + \text{H}]^+$  Calcd for  $\text{C}_{26}\text{H}_{32}\text{NO}_2\text{S}$  422.2148; Found 422.2141.

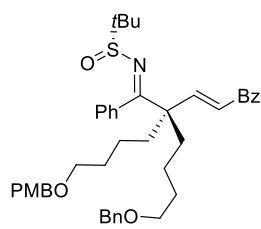

**3x**

(*R*)-*N*-((*Z*)-6-(benzyloxy)-2-(4-((4-methoxybenzyl)oxy)butyl)-2-((*E*)-

3-oxo-3-phenylprop-1-en-1-yl)-1-phenylhexylidene)-2-methylpropane-2-sulfonamide (**3x**): According to the general procedure B, reaction was performed using enesulfonamide **1x** (43.3 mg, 0.075 mmol, 1.0 equiv), *t*BuOK in THF (1.0 M, 90  $\mu\text{L}$ , 0.090 mmol, 1.2 equiv), **2a** (20.0 mg, 0.113

mmol, 1.5 equiv) with THF as solvent, DBU (45.8 mg, 0.301 mmol, 4.0 equiv). Column chromatography (30% ethyl acetate/petroleum ether as eluent) afforded **3x** as a light yellow oil (43.0 mg, 81%). Diastereomeric ratio was determined by HPLC analysis of the crude reaction mixture (dr = 98:2), HPLC (IG-3, *n*-hexane/*i*PrOH = 90/10, flow rate = 1.0 mL/min,  $\lambda = 254$  nm)  $t_{\text{R}} = 48.5$  min (major), 53.7 min (minor). Analytical data for **3x**:  $R_f = 0.30$  (petroleum ether/ethyl acetate = 2/1);  $[\alpha]_{\text{D}}^{25} = -296.2$  ( $c$  0.16,  $\text{CH}_2\text{Cl}_2$ );  $^1\text{H}$  NMR (400 MHz,  $\text{CDCl}_3$ )  $\delta$  7.87–7.82 (m, 2H), 7.59–7.52 (m, 1H), 7.48–7.42 (m, 2H), 7.39–7.29 (m, 7H), 7.29–7.26 (m, 1H), 7.24–7.20 (m, 2H), 7.11–7.01 (m, 3H), 6.88–6.77 (m, 3H), 4.47 (s, 2H), 4.40 (s, 2H), 3.77 (s, 3H), 3.49–3.37 (m, 4H), 1.95–1.76 (m, 4H), 1.65–1.55 (m, 4H), 1.49–1.33 (m, 4H), 1.20 (s, 9H);  $^{13}\text{C}\{^1\text{H}\}$  NMR (100 MHz,  $\text{CDCl}_3$ )  $\delta$  190.4, 187.2, 159.2, 151.3, 138.6, 137.7, 136.5, 133.0, 130.7, 129.3, 129.1, 128.73, 128.68, 128.5, 128.0, 127.7, 127.63, 126.5, 126.3, 113.9, 73.0, 72.7, 70.0, 69.6, 56.5, 55.9, 55.4, 34.3, 34.2, 30.2, 22.3, 21.0; HRMS (ESI-Orbitrap)  $m/z$ :  $[\text{M} + \text{H}]^+$  Calcd for  $\text{C}_{44}\text{H}_{54}\text{NO}_5\text{S}$  708.3717; Found 708.3696.

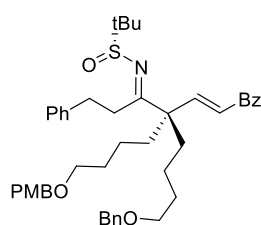

**3y**

(*R*)-*N*-((*E*)-8-(benzyloxy)-4-(4-((4-methoxybenzyl)oxy)butyl)

-4-((*E*)-3-oxo-3-phenylprop-1-en-1-yl)-1-phenyloctan-3-ylidene)-2-methylpropane-2-sulfonamide (**3y**): According to the general procedure B, reaction was performed using enesulfonamide **1y** (48.4 mg, 0.080 mmol, 1.0 equiv), *t*BuOK in THF (1.0 M, 100  $\mu\text{L}$ , 0.096 mmol, 1.2 equiv), **2a**

(21.3 mg, 0.120 mmol, 1.5 equiv), DBU (48.9 mg, 0.321 mmol, 4.0 equiv). Column chromatography (25% ethyl acetate/petroleum ether as eluent) afforded **3y** as a light yellow oil (36.5 mg, 62%). Diastereomeric ratio was determined by HPLC analysis of the crude reaction mixture (dr = 96.5:3.5),

HPLC (IG-3, *n*-hexane/*i*PrOH = 90/10, flow rate = 1.0 mL/min,  $\lambda = 254$  nm)  $t_R = 46.0$  min (minor), 50.2 min (major). Analytical data for **3y**:  $R_f = 0.30$  (petroleum ether/ethyl acetate = 3/1);  $[\alpha]_D^{25} = -258.8$  ( $c$  0.19,  $\text{CH}_2\text{Cl}_2$ );  $^1\text{H NMR}$  (400 MHz,  $\text{CDCl}_3$ )  $\delta$  7.92–7.88 (m, 2H), 7.58–7.51 (m, 1H), 7.48–7.41 (m, 2H), 7.30–7.26 (m, 3H), 7.25–7.21 (m, 2H), 7.21–7.17 (m, 6H), 7.15–7.09 (m, 2H), 6.91 (d,  $J = 16.0$  Hz, 1H), 6.86–6.76 (m, 2H), 4.44 (s, 2H), 4.37 (s, 2H), 3.73 (s, 3H), 3.46–3.35 (m, 4H), 3.18–2.97 (m, 2H), 2.74–2.58 (m, 2H), 1.92–1.81 (m, 2H), 1.81–1.73 (m, 2H), 1.64–1.55 (m, 4H), 1.27 (s, 12H), 1.23 (s, 1H);  $^{13}\text{C}\{^1\text{H}\}$  NMR (100 MHz,  $\text{CDCl}_3$ )  $\delta$  190.2, 185.7, 159.2, 151.6, 140.7, 138.5, 137.8, 133.1, 130.6, 129.3, 128.8, 128.64, 128.56, 128.5, 127.7, 127.6, 126.4, 125.7, 113.9, 73.0, 72.7, 70.0, 69.7, 57.8, 56.7, 55.3, 34.8, 34.6, 33.7, 30.4, 22.9, 21.11, 21.07; HRMS (ESI-Orbitrap)  $m/z$ :  $[\text{M} + \text{H}]^+$  Calcd for  $\text{C}_{46}\text{H}_{58}\text{NO}_5\text{S}$  736.4030; Found 736.4027.

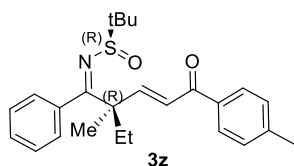

(*R*)-*N*-((*R*,1*E*,3*E*)-2-ethyl-2-methyl-5-oxo-1-phenyl-5-(*p*-tolyl)pent-3-en-1-ylidene)-2-methylpropane-2-sulfonamide (**3z**): According to the general procedure B, reaction was performed using enesulfonamide **1a** (26.5 mg, 0.100 mmol, 1.0 equiv), *t*BuOK in THF (1.0 M, 120  $\mu\text{L}$ ,

0.120 mmol, 1.2 equiv), **2b** (28.7 mg, 0.150 mmol, 1.5 equiv) with THF as solvent, DBU (60.9 mg, 0.401 mmol, 4.0 equiv). Column chromatography (25% ethyl acetate/petroleum ether as eluent) afforded to afford **3z** as a pale yellow solid (36.9 mg, 90%). Diastereomeric ratio was determined by  $^1\text{H NMR}$  analysis of the crude reaction mixture ( $dr > 20:1$ ). Analytical data for **3z**:  $R_f = 0.30$  (petroleum ether/ethyl acetate = 3/1); mp 103–104  $^\circ\text{C}$ ;  $[\alpha]_D^{25} = -299.2$  ( $c$  0.12,  $\text{CH}_2\text{Cl}_2$ );  $^1\text{H NMR}$  (400 MHz,  $\text{CDCl}_3$ )  $\delta$  7.82–7.74 (m, 2H), 7.42–7.33 (m, 3H), 7.24 (s, 2H), 7.13–7.04 (m, 3H), 6.85 (d,  $J = 15.6$  Hz, 1H), 2.41 (s, 3H), 1.93–1.76 (m, 2H), 1.39 (s, 3H), 1.21 (s, 9H), 0.94 (t,  $J = 7.6$  Hz, 3H);  $^{13}\text{C}\{^1\text{H}\}$  NMR (100 MHz,  $\text{CDCl}_3$ )  $\delta$  190.1, 188.1, 151.7, 143.9, 136.6, 135.2, 129.4, 129.0, 128.8, 128.0, 126.6, 125.4, 56.4, 52.6, 31.2, 22.3, 21.8, 21.1, 9.1; HRMS (ESI-Orbitrap)  $m/z$ :  $[\text{M} + \text{H}]^+$  Calcd for  $\text{C}_{25}\text{H}_{32}\text{NO}_2\text{S}$  410.2148; Found 410.2143.

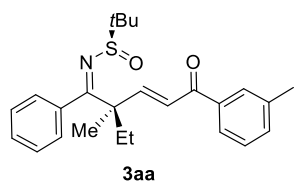

(*R*)-*N*-((*R*,1*E*,3*E*)-2-ethyl-2-methyl-5-oxo-1-phenyl-5-(*m*-tolyl)pent-3-en-1-ylidene)-2-methylpropane-2-sulfonamide (**3aa**): According to the general procedure B, reaction was performed using enesulfonamide **1a** (26.5 mg, 0.100 mmol, 1.0 equiv), *t*BuOK in THF (1.0 M, 120  $\mu\text{L}$ ,

0.120 mmol, 1.2 equiv), **2c** (28.7 mg, 0.150 mmol, 1.5 equiv) with THF as solvent, DBU (60.9 mg, 0.401 mmol, 4.0 equiv). Column chromatography (20% ethyl acetate/petroleum ether as eluent)

afforded **3aa** as a light yellow solid (38.9 mg, 95%). Diastereomeric ratio was determined by  $^1\text{H}$  NMR analysis of the crude reaction mixture ( $\text{dr} > 20:1$ ). Analytical data for **3aa**:  $R_f = 0.30$  (petroleum ether/ethyl acetate = 3/1); mp 80–81 °C;  $[\alpha]_D^{25} = -236.4$  ( $c$  0.26,  $\text{CH}_2\text{Cl}_2$ );  $^1\text{H}$  NMR (400 MHz,  $\text{CDCl}_3$ )  $\delta$  7.82–7.74 (m, 2H), 7.42–7.33 (m, 3H), 7.24 (s, 2H), 7.13–7.04 (m, 3H), 6.85 (d,  $J = 15.6$  Hz, 1H), 2.41 (s, 3H), 1.93–1.76 (m, 2H), 1.39 (s, 3H), 1.21 (s, 9H), 0.94 (t,  $J = 7.6$  Hz, 3H);  $^{13}\text{C}\{^1\text{H}\}$  NMR (100 MHz,  $\text{CDCl}_3$ )  $\delta$  190.7, 188.0, 152.1, 138.6, 137.8, 136.6, 133.8, 129.1, 129.0, 128.5, 128.0, 126.6, 125.9, 125.6, 56.4, 52.6, 31.2, 22.3, 21.5, 21.1, 9.1; HRMS (ESI-Orbitrap)  $m/z$ :  $[\text{M} + \text{H}]^+$  Calcd for  $\text{C}_{25}\text{H}_{32}\text{NO}_2\text{S}$  410.2148; Found 410.2139.

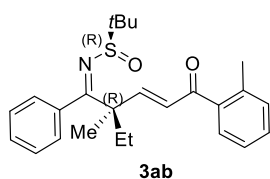

*(R)*-*N*-((*R*,1*E*,3*E*)-2-ethyl-2-methyl-5-oxo-1-phenyl-5-(*o*-tolyl)pent-3-en-1-ylidene)-2-methylpropane-2-sulfonamide (**3ab**): According to the general procedure B, reaction was performed using enesulfonamide **1a** (26.5 mg, 0.100 mmol, 1.0 equiv), *t*BuOK in THF (1.0 M, 120  $\mu\text{L}$ , 0.120

mmol, 1.2 equiv), **2d** (28.7 mg, 0.150 mmol, 1.5 equiv) with THF as solvent, DBU (60.9 mg, 0.401 mmol, 4.0 equiv). Column chromatography (20% ethyl acetate/petroleum ether as eluent) afforded **3ab** as a light yellow oil (37.3 mg, 91%). Diastereomeric ratio was determined by  $^1\text{H}$  NMR analysis of the crude reaction mixture ( $\text{dr} > 20:1$ ). Analytical data for **3ab**:  $R_f = 0.30$  (petroleum ether/ethyl acetate = 3/1);  $[\alpha]_D^{25} = -285.3$  ( $c$  0.20,  $\text{CH}_2\text{Cl}_2$ );  $^1\text{H}$  NMR (400 MHz,  $\text{CDCl}_3$ )  $\delta$  7.39–7.30 (m, 4H), 7.26–7.15 (m, 3H), 7.09–7.01 (m, 2H), 6.79 (d,  $J = 16.0$  Hz, 1H), 6.45 (d,  $J = 16.0$  Hz, 1H), 2.35 (s, 3H), 1.91–1.70 (m, 2H), 1.35 (s, 3H), 1.16 (s, 9H), 0.91 (t,  $J = 7.4$  Hz, 3H);  $^{13}\text{C}\{^1\text{H}\}$  NMR (100 MHz,  $\text{CDCl}_3$ )  $\delta$  196.7, 188.0, 153.9, 138.6, 136.8, 136.5, 131.3, 130.5, 129.9, 129.0, 128.02, 127.96, 126.5, 125.4, 56.4, 52.5, 31.2, 22.2, 21.1, 20.2, 9.1; HRMS (ESI-Orbitrap)  $m/z$ :  $[\text{M} + \text{H}]^+$  Calcd for  $\text{C}_{25}\text{H}_{32}\text{NO}_2\text{S}$  410.2148; Found 410.2140.

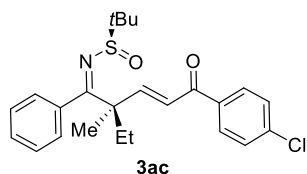

*(R)*-*N*-((*R*,1*E*,3*E*)-5-(4-chlorophenyl)-2-ethyl-2-methyl-5-oxo-1-phenylpent-3-en-1-ylidene)-2-methylpropane-2-sulfonamide (**3ac**):

According to the general procedure B, reaction was performed using enesulfonamide **1a** (26.5 mg, 0.100 mmol, 1.0 equiv), *t*BuOK in THF (1.0 M, 120  $\mu\text{L}$ , 0.120 mmol, 1.2 equiv), **2e** (31.7 mg, 0.150 mmol, 1.5 equiv) with THF as solvent, DBU (60.9 mg, 0.401 mmol, 4.0 equiv). Column chromatography (20% ethyl acetate/petroleum ether as eluent) afforded **3ac** as a light yellow solid (37.8 mg, 88%). Diastereomeric ratio was determined by  $^1\text{H}$  NMR analysis of the crude reaction mixture ( $\text{dr} > 20:1$ ). Analytical data for **3ac**:

$R_f = 0.30$  (petroleum ether/ethyl acetate = 3/1); mp 91–92 °C;  $[\alpha]_D^{25} = -236.1$  ( $c$  0.23,  $\text{CH}_2\text{Cl}_2$ );  $^1\text{H}$  NMR (400 MHz,  $\text{CDCl}_3$ )  $\delta$  7.83–7.76 (m, 2H), 7.45–7.39 (m, 2H), 7.40–7.35 (m, 3H), 7.13–7.06 (m, 3H), 6.80 (d,  $J = 15.8$  Hz, 1H), 1.86 (m, 2H), 1.38 (s, 3H), 1.20 (s, 9H), 0.94 (t,  $J = 7.4$  Hz, 3H);  $^{13}\text{C}\{^1\text{H}\}$  NMR (100 MHz,  $\text{CDCl}_3$ )  $\delta$  189.4, 188.1, 152.9, 139.4, 136.5, 136.0, 130.1, 129.04, 129.01, 128.1, 126.6, 125.0, 56.4, 52.6, 31.3, 22.3, 21.1, 9.1; HRMS (ESI-Orbitrap)  $m/z$ :  $[\text{M} + \text{H}]^+$  Calcd for  $\text{C}_{24}\text{H}_{29}\text{ClNO}_2\text{S}$  430.1602; Found 430.1595.

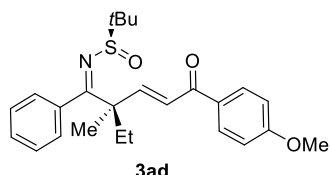

(*R*)-*N*-((*R*,1*E*,3*E*)-2-ethyl-5-(4-methoxyphenyl)-2-methyl-5-oxo-1-phenylpent-3-en-1-ylidene)-2-methylpropane-2-sulfinamide

**(3ad)**: According to the general procedure B, reaction was performed using enesulfinamide **1a** (26.5 mg, 0.100 mmol, 1.0 equiv), *t*BuOK in THF (1.0 M, 120  $\mu\text{L}$ , 0.120 mmol, 1.2 equiv), **2f** (31.1 mg, 0.150 mmol, 1.5 equiv) with THF as solvent, DBU (60.9 mg, 0.401 mmol, 4.0 equiv). Column chromatography (20% ethyl acetate/petroleum ether as eluent) afforded **3ad** as a light yellow solid (39.1 mg, 92%). Diastereomeric ratio was determined by  $^1\text{H}$  NMR analysis of the crude reaction mixture (dr > 20:1). Analytical data for **3ad**:  $R_f = 0.30$  (petroleum ether/ethyl acetate = 3/1); mp 88–89 °C;  $[\alpha]_D^{25} = -348.7$  ( $c$  0.15,  $\text{CH}_2\text{Cl}_2$ );  $^1\text{H}$  NMR (400 MHz,  $\text{CDCl}_3$ )  $\delta$  7.92–7.86 (m, 2H), 7.41–7.33 (m, 2H), 7.13–7.02 (m, 3H), 6.97–6.90 (m, 2H), 6.86 (d,  $J = 15.6$  Hz, 1H), 3.87 (s, 3H), 1.92–1.75 (m, 3H), 1.39 (s, 3H), 1.21 (s, 9H), 0.94 (t,  $J = 7.4$  Hz, 3H);  $^{13}\text{C}\{^1\text{H}\}$  NMR (100 MHz,  $\text{CDCl}_3$ )  $\delta$  188.8, 188.2, 163.6, 151.2, 136.7, 131.1, 130.7, 129.0, 128.1, 126.7, 125.2, 114.0, 56.4, 55.6, 52.5, 31.2, 22.3, 21.1, 9.1; HRMS (ESI-Orbitrap)  $m/z$ :  $[\text{M} + \text{H}]^+$  Calcd for  $\text{C}_{25}\text{H}_{32}\text{NO}_3\text{S}$  426.2097; Found 426.2089.

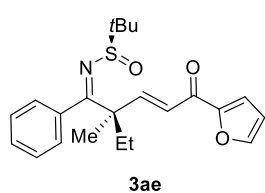

(*R*)-*N*-((*R*,1*E*,3*E*)-2-ethyl-5-(furan-2-yl)-2-methyl-5-oxo-1-phenylpent-3-en-1-ylidene)-2-methylpropane-2-sulfinamide (**3ae**): According to the general procedure B, reaction was performed using enesulfinamide **1a** (26.5 mg, 0.100 mmol, 1.0 equiv), *t*BuOK in THF (1.0 M, 120  $\mu\text{L}$ , 0.120

mmol, 1.2 equiv), **2g** (25.1 mg, 0.150 mmol, 1.5 equiv) with THF as solvent, DBU (60.9 mg, 0.401 mmol, 4.0 equiv). Column chromatography (20% ethyl acetate/petroleum ether as eluent) afforded **3ae** as a light brown solid (31.6 mg, 82%). Diastereomeric ratio was determined by  $^1\text{H}$  NMR analysis of the crude reaction mixture (dr > 20:1). Analytical data for **3ae**:  $R_f = 0.30$  (petroleum ether/ethyl acetate = 3/1); mp 106–107 °C;  $[\alpha]_D^{25} = -254.0$  ( $c$  0.25,  $\text{CH}_2\text{Cl}_2$ );  $^1\text{H}$  NMR (400 MHz,  $\text{CDCl}_3$ )  $\delta$  7.63–7.59 (m, 1H), 7.39–7.32 (m, 3H), 7.26–7.16 (m, 2H), 7.11–7.03 (m, 2H), 6.80 (d,  $J$

= 16.0 Hz, 1H), 6.57–6.54 (m, 1H), 1.92–1.75 (m, 2H), 1.37 (s, 3H), 1.20 (s, 9H), 0.92 (t,  $J = 7.6$  Hz, 3H);  $^{13}\text{C}\{^1\text{H}\}$  NMR (100 MHz,  $\text{CDCl}_3$ )  $\delta$  188.0, 177.7, 153.3, 151.7, 146.8, 136.5, 129.0, 128.0, 126.6, 124.3, 118.1, 112.6, 56.4, 52.5, 31.2, 22.3, 20.9, 9.0; HRMS (ESI-Orbitrap)  $m/z$ :  $[\text{M} + \text{H}]^+$  Calcd for  $\text{C}_{22}\text{H}_{28}\text{NO}_3\text{S}$  386.1784; Found 386.1779.

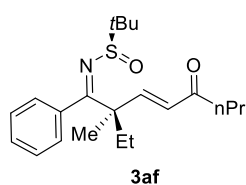

(*R*)-*N*-((*R*,1*E*,3*E*)-2-ethyl-2-methyl-5-oxo-1-phenylnon-3-en-1-ylidene)-2-methylpropane-2-sulfonamide (**3af**): According to the general procedure B, reaction was performed using enesulfonamide **1a** (26.5 mg, 0.100 mmol, 1.0 equiv), *t*BuOK in THF (1.0 M, 120  $\mu\text{L}$ , 0.120 mmol, 1.2 equiv), **2h** (21.5

mg, 0.150 mmol, 1.5 equiv) with THF as solvent, DBU (60.9 mg, 0.401 mmol, 4.0 equiv). Column chromatography (15% ethyl acetate/petroleum ether as eluent) afforded **3af** as a light yellow oil (31.2 mg, 83%). Diastereomeric ratio was determined by  $^1\text{H}$  NMR analysis of the crude reaction mixture ( $\text{dr} > 20:1$ ). Analytical data for **3af**:  $R_f = 0.20$  (petroleum ether/ethyl acetate = 5/1);  $[\alpha]_D^{25} = -204.4$  ( $c$  0.22,  $\text{CH}_2\text{Cl}_2$ );  $^1\text{H}$  NMR (400 MHz,  $\text{CDCl}_3$ )  $\delta$  7.43–7.34 (m, 3H), 7.10–7.00 (m, 2H), 6.88 (d,  $J = 16.4$  Hz, 1H), 6.06 (d,  $J = 16.4$  Hz, 1H), 2.49 (t,  $J = 7.2$  Hz, 2H), 1.83–1.75 (m, 2H), 1.66–1.56 (m, 2H), 1.30 (s, 3H), 1.20 (s, 9H), 0.94–0.87 (m, 6H);  $^{13}\text{C}\{^1\text{H}\}$  NMR (100 MHz,  $\text{CDCl}_3$ )  $\delta$  200.5, 188.2, 149.9, 136.5, 129.5, 129.0, 128.1, 126.6, 56.4, 52.2, 42.3, 31.2, 22.3, 20.9, 17.8, 13.9, 9.1; HRMS (ESI-Orbitrap)  $m/z$ :  $[\text{M} + \text{H}]^+$  Calcd for  $\text{C}_{21}\text{H}_{32}\text{NO}_2\text{S}$  362.2148; Found 362.2141.

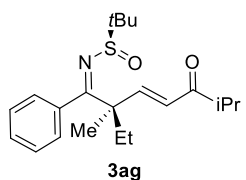

(*R*)-*N*-((*R*,1*E*,3*E*)-2-ethyl-2,6-dimethyl-5-oxo-1-phenylhept-3-en-1-ylidene)-2-methylpropane-2-sulfonamide (**3ag**): According to the general procedure B, reaction was performed using enesulfonamide **1a** (26.5 mg, 0.100 mmol, 1.0 equiv), *t*BuOK in THF (1.0 M, 120  $\mu\text{L}$ , 0.120 mmol, 1.2

equiv), **2i** (21.5 mg, 0.150 mmol, 1.5 equiv) with THF as solvent, DBU (60.9 mg, 0.401 mmol, 4.0 equiv). Column chromatography (15% ethyl acetate/petroleum ether as eluent) afforded **3ag** as a light yellow oil (35.0 mg, 97%). Diastereomeric ratio was determined by  $^1\text{H}$  NMR analysis of the crude reaction mixture ( $\text{dr} = 30:1$ ). Analytical data for **3ag**:  $R_f = 0.20$  (petroleum ether/ethyl acetate = 5/1);  $[\alpha]_D^{25} = -231.2$  ( $c$  0.19,  $\text{CH}_2\text{Cl}_2$ );  $\text{dr} > 20:1$  (diastereomeric ratio was determined by  $^1\text{H}$  NMR analysis of the crude reaction mixture);  $^1\text{H}$  NMR (400 MHz,  $\text{CDCl}_3$ )  $\delta$  7.41–7.29 (m, 3H), 7.08–6.99 (m, 2H), 6.91 (d,  $J = 16.0$  Hz, 1H), 6.12 (d,  $J = 16.0$  Hz, 1H), 2.90–2.71 (m, 1H), 1.90–1.66 (m, 2H), 1.30 (s, 3H), 1.19 (s, 9H), 1.07 (dd,  $J = 6.8, 5.2$  Hz, 6H), 0.90 (t,  $J = 7.4$  Hz, 3H);  $^{13}\text{C}\{^1\text{H}\}$  NMR (100 MHz,  $\text{CDCl}_3$ )  $\delta$  203.7, 188.1, 149.8, 136.5, 129.0, 128.0, 127.7, 126.6, 56.4, 52.2, 38.7,



31.1, 22.2, 20.9, 18.5, 18.4, 9.0; HRMS (ESI-Orbitrap)  $m/z$ :  $[M + H]^+$  Calcd for  $C_{21}H_{32}NO_2S$  362.2148; Found 362.2148.

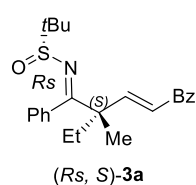

$(R)$ - $N$ -(( $S,1Z,3E$ )-2-ethyl-2-methyl-5-oxo-1,5-diphenylpent-3-en-1-ylidene)-2-methylpropane-2-sulfonamide ( $(R_S, S)$ -**3a**): According to the general procedure A, reaction was performed using  $N$ -*tert*-butanesulfinyl ketimine ( $R_S, S$ )-**1a** (26.5 mg, 0.100 mmol, 1.0 equiv), *t*BuOK in THF (1.0 M, 120  $\mu$ L, 0.120 mmol, 1.2

equiv), **2a** (26.6 mg, 0.150 mmol, 1.5 equiv). Column chromatography (25% ethyl acetate/petroleum ether as eluent) afforded ( $R_S, S$ )-**3a** as a pale brown solid (36.4 mg, 92%). Diastereomeric ratio was determined by  $^1H$  NMR analysis of the crude reaction mixture (dr > 20:1). Analytical data for ( $R_S, S$ )-**3a**:  $R_f$  = 0.30 (petroleum ether/ethyl acetate = 3/1); mp 104–105  $^{\circ}C$ ;  $[\alpha]^{25}_D = -94.2$  ( $c$  0.12,  $CH_2Cl_2$ );  $^1H$  NMR (400 MHz,  $CDCl_3$ )  $\delta$  7.89–7.82 (m, 2H), 7.59–7.53 (m, 1H), 7.49–7.43 (m, 2H), 7.39–7.34 (m, 3H), 7.15–7.05 (m, 3H), 6.83 (d,  $J$  = 16.0 Hz, 1H), 1.97–1.84 (m, 2H), 1.37 (s, 3H), 1.21 (s, 9H), 0.96 (t,  $J$  = 7.4 Hz, 3H);  $^{13}C\{^1H\}$  NMR (100 MHz,  $CDCl_3$ )  $\delta$  190.6, 188.2, 152.3, 137.8, 136.7, 133.0, 129.0, 128.72, 128.69, 128.1, 126.6, 125.6, 56.4, 52.7, 31.3, 22.3, 21.1, 9.1; HRMS (ESI-Orbitrap)  $m/z$ :  $[M + H]^+$  Calcd for  $C_{24}H_{30}NO_2S$  396.1992; Found 396.1989.

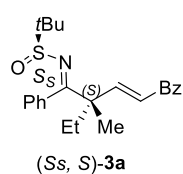

$(S)$ - $N$ -(( $S,1Z,3E$ )-2-ethyl-2-methyl-5-oxo-1,5-diphenylpent-3-en-1-ylidene)-2-methylpropane-2-sulfonamide ( $(S_S, S)$ -**3a**): According to the general procedure A, reaction was performed using  $N$ -*tert*-butanesulfinyl ketimine ( $S_S, S$ )-**1a** (26.5 mg, 0.100 mmol, 1.0 equiv), *t*BuOK in THF (1.0 M, 120  $\mu$ L, 0.120 mmol, 1.2 equiv),

**2a** (26.6 mg, 0.150 mmol, 1.5 equiv). Column chromatography (25% ethyl acetate/petroleum ether as eluent) afforded ( $R_S, S$ )-**3a** as a pale yellow oil (38.8 mg, 98%). Diastereomeric ratio was determined by  $^1H$  NMR analysis of the crude reaction mixture (dr > 20:1). Analytical data for ( $S_S, S$ )-**3a**:  $R_f$  = 0.30 (petroleum ether/ethyl acetate = 3/1);  $[\alpha]^{25}_D = +86.1$  ( $c$  0.17,  $CH_2Cl_2$ );  $^1H$  NMR (400 MHz,  $CDCl_3$ )  $\delta$  7.89–7.82 (m, 2H), 7.59–7.51 (m, 1H), 7.48–7.41 (m, 2H), 7.39–7.34 (m, 3H), 7.12–7.06 (m, 3H), 6.85 (d,  $J$  = 15.6 Hz, 1H), 1.94–1.76 (m, 2H), 1.39 (s, 3H), 1.20 (s, 9H), 0.95 (t,  $J$  = 7.6 Hz, 3H);  $^{13}C\{^1H\}$  NMR (100 MHz,  $CDCl_3$ )  $\delta$  190.6, 188.0, 152.2, 137.7, 136.6, 132.9, 129.0, 128.7, 128.6, 128.0, 126.6, 125.4, 56.4, 52.6, 31.2, 22.3, 21.1, 9.0; HRMS (ESI-Orbitrap)  $m/z$ :  $[M + H]^+$  Calcd for  $C_{24}H_{30}NO_2S$  396.1992; Found 396.1989.

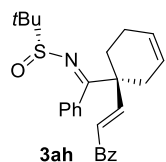

(*R*)-2-methyl-*N*-((*Z*)-((*R*)-1-((*E*)-3-oxo-3-phenylprop-1-en-1-yl)cyclohex-3-en-1-yl)(phenyl)methylene)propane-2-sulfinamide (**3ah**): According to the general procedure A, reaction was performed using *N-tert*-butanesulfinyl ketimine (*R<sub>S</sub>*, *R*)-

**1ah** (28.9 mg, 0.100 mmol, 1.0 equiv), *t*BuOK in THF (1.0 M, 120  $\mu$ L, 0.120 mmol, 1.2 equiv), **2a** (26.6 mg, 0.150 mmol, 1.5 equiv). Column chromatography (20% ethyl acetate/petroleum ether as eluent) afforded **3ah** as a pale brown solid (40.7 mg, 97%). Diastereomeric ratio was determined by  $^1\text{H}$  NMR analysis of the crude reaction mixture (dr = 30:1). Analytical data for **3ah**:  $R_f$  = 0.30 (petroleum ether/ethyl acetate = 3/1); mp 139–140  $^\circ\text{C}$ ;  $[\alpha]_D^{25} = -169.1$  (*c* 0.27,  $\text{CH}_2\text{Cl}_2$ );  $^1\text{H}$  NMR (400 MHz,  $\text{CDCl}_3$ )  $\delta$  7.90–7.83 (m, 2H), 7.59–7.53 (m, 1H), 7.49–7.42 (m, 2H), 7.40–7.31 (m, 3H), 7.13–7.08 (m, 2H), 7.00 (d,  $J = 15.6$  Hz, 1H), 6.91 (d,  $J = 15.6$  Hz, 1H), 5.75–5.62 (m, 2H), 2.54–2.45 (m, 1H), 2.32–2.14 (m, 3H), 2.11–1.97 (m, 2H), 1.21 (s, 9H);  $^{13}\text{C}\{^1\text{H}\}$  NMR (100 MHz,  $\text{CDCl}_3$ )  $\delta$  190.2, 187.4, 150.1, 137.7, 136.3, 133.1, 129.1, 128.7, 128.6, 127.9, 127.4, 126.8, 126.4, 124.0, 56.4, 51.2, 32.5, 30.1, 22.9, 22.2; HRMS (ESI-Orbitrap)  $m/z$ :  $[\text{M} + \text{H}]^+$  Calcd for  $\text{C}_{26}\text{H}_{30}\text{NO}_2\text{S}$  420.1992; Found 420.1985.

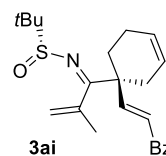

(*R*)-2-methyl-*N*-((*E*)-2-methyl-1-((*R*)-1-((*E*)-3-oxo-3-phenylprop-1-en-1-yl)cyclohex-3-en-1-yl)allylidene)propane-2-sulfinamide (**3ai**): According to the general procedure A, reaction was performed using *N-tert*-butanesulfinyl ketimine

(*R<sub>S</sub>*, *R*)-**1ai** (25.3 mg, 0.100 mmol, 1.0 equiv), *t*BuOK in THF (1.0 M, 120  $\mu$ L, 0.120 mmol, 1.2 equiv), **2a** (26.6 mg, 0.150 mmol, 1.5 equiv). Column chromatography (20% ethyl acetate/petroleum ether as eluent) afforded **3ai** as a colorless oil (37.9 mg, 99%). Diastereomeric ratio was determined by  $^1\text{H}$  NMR analysis of the crude reaction mixture (dr > 20:1). Analytical data for **3ai**:  $R_f$  = 0.30 (petroleum ether/ethyl acetate = 3/1);  $[\alpha]_D^{25} = -118.1$  (*c* 0.34,  $\text{CH}_2\text{Cl}_2$ );  $^1\text{H}$  NMR (400 MHz,  $\text{CDCl}_3$ )  $\delta$  7.91–7.85 (m, 2H), 7.59–7.51 (m, 1H), 7.49–7.42 (m, 2H), 7.00–6.88 (m, 2H), 5.77–5.63 (m, 2H), 5.15 (s, 1H), 4.80 (s, 1H), 2.62 (d,  $J = 17.6$  Hz, 1H), 2.39 (d,  $J = 17.6$  Hz, 1H), 2.23–1.95 (m, 4H), 1.93 (s, 3H), 1.23 (s, 9H);  $^{13}\text{C}\{^1\text{H}\}$  NMR (100 MHz,  $\text{CDCl}_3$ )  $\delta$  190.1, 189.2, 150.1, 142.0, 137.7, 133.1, 128.7, 128.6, 127.1, 125.9, 124.2, 116.4, 56.4, 50.2, 32.1, 30.0, 24.5, 22.8, 22.3; HRMS (ESI-Orbitrap)  $m/z$ :  $[\text{M} + \text{H}]^+$  Calcd for  $\text{C}_{23}\text{H}_{30}\text{NO}_2\text{S}$  384.1992; Found 384.1992.

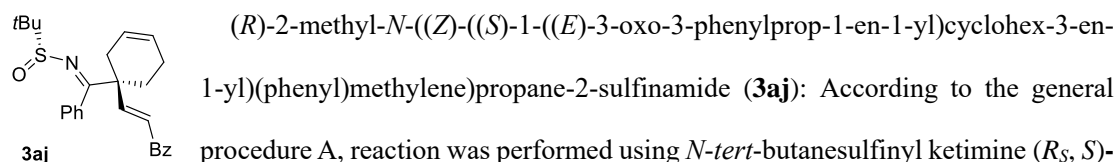

procedure A, reaction was performed using *N*-*tert*-butanesulfinyl ketimine (*R*<sub>S</sub>, *S*)-**1aj** (28.9 mg, 0.100 mmol, 1.0 equiv), *t*BuOK in THF (1.0 M, 120 μL, 0.120 mmol, 1.2 equiv), **2a** (26.6 mg, 0.150 mmol, 1.5 equiv). Column chromatography (20% ethyl acetate/petroleum ether as eluent) afforded **3aj** as a pale brown solid (39.8 mg, 95%). Diastereomeric ratio was determined by <sup>1</sup>H NMR analysis of the crude reaction mixture (dr > 20:1). Analytical data for **3aj**: R<sub>f</sub> = 0.30 (petroleum ether/ethyl acetate = 3/1); [α]<sub>D</sub><sup>25</sup> = -256.6 (*c* 0.28, CH<sub>2</sub>Cl<sub>2</sub>); mp 95–96 °C; <sup>1</sup>H NMR (400 MHz, CDCl<sub>3</sub>) δ 7.92–7.83 (m, 2H), 7.60–7.51 (m, 1H), 7.49–7.41 (m, 2H), 7.39–7.30 (m, 3H), 7.13–7.07 (m, 2H), 7.01 (d, *J* = 15.6 Hz, 1H), 6.94 (d, *J* = 16.0 Hz, 1H), 5.78–5.57 (m, 2H), 2.54–2.41 (m, 1H), 2.33–2.12 (m, 3H), 2.11–1.97 (m, 2H), 1.23 (s, 9H); <sup>13</sup>C{<sup>1</sup>H} NMR (100 MHz, CDCl<sub>3</sub>) δ 190.2, 186.5, 150.1, 137.7, 136.4, 133.0, 129.0, 128.71, 128.66, 127.9, 127.4, 126.7, 126.5, 124.2, 56.6, 51.1, 32.7, 30.0, 23.0, 22.3; HRMS (ESI-Orbitrap) *m/z*: [M + H]<sup>+</sup> Calcd for C<sub>26</sub>H<sub>30</sub>NO<sub>2</sub>S 420.1992; Found 420.1987.

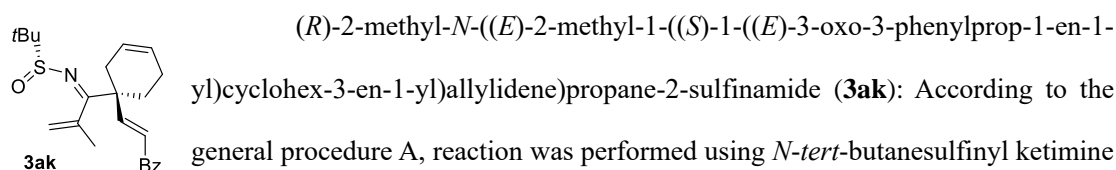

general procedure A, reaction was performed using *N*-*tert*-butanesulfinyl ketimine (*R*<sub>S</sub>, *S*)-**1ak** (25.3 mg, 0.100 mmol, 1.0 equiv), *t*BuOK in THF (1.0 M, 120 μL, 0.120 mmol, 1.2 equiv), **2a** (26.6 mg, 0.150 mmol, 1.5 equiv). Column chromatography (20% ethyl acetate/petroleum ether as eluent) afforded **3ak** as a colorless oil (36.8 mg, 96%). Diastereomeric ratio was determined by <sup>1</sup>H NMR analysis of the crude reaction mixture (dr > 20:1). Analytical data for **3ak**: R<sub>f</sub> = 0.30 (petroleum ether/ethyl acetate = 3/1); [α]<sub>D</sub><sup>25</sup> = -240.3 (*c* 0.3, CH<sub>2</sub>Cl<sub>2</sub>); <sup>1</sup>H NMR (400 MHz, CDCl<sub>3</sub>) δ 7.96–7.85 (m, 2H), 7.59–7.51 (m, 1H), 7.48–7.41 (m, 2H), 6.97 (s, 2H), 5.81–5.60 (m, 2H), 5.14 (s, 1H), 4.82 (s, 1H), 2.60–2.51 (m, 1H), 2.44–2.35 (m, 1H), 2.22–2.06 (m, 2H), 2.06–1.96 (m, 2H), 1.93 (s, 3H), 1.24 (s, 9H); <sup>13</sup>C{<sup>1</sup>H} NMR (100 MHz, CDCl<sub>3</sub>) δ 190.2, 188.6, 150.4, 142.2, 137.7, 133.0, 128.7, 128.6, 127.3, 125.9, 124.2, 116.1, 56.5, 50.1, 32.3, 30.1, 24.2, 22.9, 22.4; HRMS (ESI-Orbitrap) *m/z*: [M + H]<sup>+</sup> Calcd for C<sub>23</sub>H<sub>30</sub>NO<sub>2</sub>S 384.1992; Found 384.1989.

### General procedure C for synthesis of 1,4-dicarbonyl analogs using $\beta$ -sulfonyl acrylonitrile **4a**

Enesulfonamide **1** (1.0 equiv) or *N*-sulfinyl ketimine **6** in freshly distilled THF (0.1 M) was added to a flame dried Schlenk tube equipped with magnetic stirring bar under argon. The resulting solution was then cooled to  $-78$  °C and a solution of potassium *tert*-butoxide in THF (1.0 M, 1.2 equiv) was added dropwise to the mixture via syringe. After 30 min, (*E*)-3-tosylacrylonitrile **4a** (2.0 equiv) in dry THF (0.1 M) was added dropwise by syringe at  $-78$  °C. The reaction progress was monitored by TLC analysis. Upon completion (usually 2–3 h), DBU (4.0 equiv) was added at  $-78$  °C and the reaction mixture was allowed to warm to room temperature in 5 h. After stirring at room temperature for 12 hours, the reaction mixture was quenched with saturated aqueous ammonium chloride. The resulting mixture was extracted with ethyl acetate (3 times) and the combined organic extracts were dried over anhydrous sodium sulfate, filtered and concentrated under reduced pressure. The residue was purified by silica gel column chromatography.

### General procedure D for synthesis of 1,4-dicarbonyl analogs using $\beta$ -sulfonyl acrylonitrile **4b**

Enesulfonamide **1** (1.0 equiv) in freshly distilled Et<sub>2</sub>O (0.1 M) was added to a flame dried Schlenk tube equipped with magnetic stirring bar under argon. The resulting clear solution was then cooled to  $-78$  °C and a solution of lithium bis(trimethylsilyl)amide in THF (1.0 M, 1.2 equiv) was added dropwise to the mixture via syringe. After 30 min, (*E*)-3-((3,5-bis(trifluoromethyl)phenyl)sulfonyl)acrylonitrile **4b** (2.0 equiv) in dry Et<sub>2</sub>O (0.1 M) was added dropwise by syringe at  $-78$  °C. The reaction progress was monitored by TLC analysis. Upon completion (usually 2–4 h), DBU (4.0 equiv) was added at  $-78$  °C and the reaction mixture was allowed to warm to room temperature in 5 h. After stirring at room temperature for 12 hours, the reaction mixture was quenched with saturated aqueous ammonium chloride. The resulting mixture was extracted with ethyl acetate (3 times) and the combined organic extracts were dried over anhydrous sodium sulfate, filtered and concentrated under reduced pressure. The residue was purified by silica gel column chromatography.

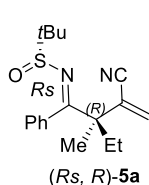

(*R*)-*N*-((*R,E*)-3-cyano-2-ethyl-2-methyl-1-phenylbut-3-en-1-ylidene)-2-methylpropane-2-sulfonamide ((*R<sub>S</sub>*, *R*)-**5a**): According to the general procedure C, reaction was performed using enesulfonamide **1a** (26.6 mg, 0.100 mmol, 1.0 equiv), *t*BuOK in THF (1.0 M, 120  $\mu$ L, 0.12 mmol, 1.2 equiv), **4a** (41.6 mg, 0.201 mmol, 2.0 equiv),

DBU (60.9 mg, 0.401 mmol, 4.0 equiv). Column chromatography (30% ethyl acetate/petroleum

ether as eluent) afforded (*R<sub>S</sub>*, *R*)-**5a** as a yellow oil (28.4 mg, 90%). Diastereomeric ratio was determined by <sup>1</sup>H NMR analysis of the crude reaction mixture (dr > 20:1). Analytical data for (*R<sub>S</sub>*, *R*)-**5a**: *R<sub>f</sub>* = 0.25 (petroleum ether/ethyl acetate = 3/1); [ $\alpha$ ]<sub>D</sub><sup>25</sup> = -132.5 (*c* 0.16, CH<sub>2</sub>Cl<sub>2</sub>); <sup>1</sup>H NMR (400 MHz, CDCl<sub>3</sub>)  $\delta$  7.41–7.36 (m, 3H), 7.15–7.09 (m, 2H), 6.11 (s, 1H), 5.79 (s, 1H), 1.99–1.88 (m, 1H), 1.79–1.69 (m, 1H), 1.38 (s, 3H), 1.24 (s, 9H), 0.90 (t, *J* = 7.4 Hz, 3H); <sup>13</sup>C{<sup>1</sup>H} NMR (100 MHz, CDCl<sub>3</sub>)  $\delta$  186.5, 135.7, 131.5, 129.1, 128.1, 127.6, 126.8, 118.3, 56.7, 53.7, 29.4, 22.3, 20.2, 8.4; HRMS (ESI-Orbitrap) *m/z*: [M + H]<sup>+</sup> Calcd for C<sub>18</sub>H<sub>25</sub>N<sub>2</sub>OS 317.1682; Found 317.1679.

### Gram scale preparation of (*R<sub>S</sub>*, *R*)-**5a**

According to the general procedure C, reaction was performed using enesulfonamide **1a** (1.07 g, 4.03 mmol, 1.0 equiv), *t*BuOK in THF (1.0 M, 4.85 mL, 4.845 mmol, 1.2 equiv), and **4a** (1.67 g, 8.06 mmol, 2.0 equiv), DBU (2.45 g, 16.15 mmol, 4.0 equiv). Column chromatography (30% ethyl acetate/petroleum ether as eluent) afforded (*R<sub>S</sub>*, *R*)-**5a** as a light yellow solid (1.081 g, 85%). Diastereomeric ratio was determined by <sup>1</sup>H NMR analysis of the crude reaction mixture (dr > 20:1).

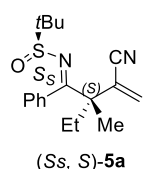

(*S*)-*N*-((*S*,*E*)-3-cyano-2-ethyl-2-methyl-1-phenylbut-3-en-1-ylidene)-2-

methylpropane-2-sulfonamide((*S<sub>S</sub>*, *S*)-**5a**): According to the general procedure C, reaction was performed using enesulfonamide (*S<sub>S</sub>*, *Z*)-**1a** (26.6 mg, 0.100 mmol, 1.0 equiv), *t*BuOK in THF (1.0 M, 120  $\mu$ L, 0.12 mmol, 1.2 equiv), **4a** (41.6 mg, 0.201

mmol, 2.0 equiv), DBU (60.9 mg, 0.402 mmol, 4.0 equiv). Column chromatography (30% ethyl acetate/petroleum ether as eluent) afforded (*S<sub>S</sub>*, *S*)-**5a** as a white solid (26.9 mg, 85%). Diastereomeric ratio was determined by <sup>1</sup>H NMR analysis of the crude reaction mixture (dr > 20:1). Analytical data for (*S<sub>S</sub>*, *S*)-**5a**: *R<sub>f</sub>* = 0.25 (petroleum ether/ethyl acetate = 3/1); mp 56–58 °C; [ $\alpha$ ]<sub>D</sub><sup>25</sup> = +138.4 (*c* 0.18, CH<sub>2</sub>Cl<sub>2</sub>); <sup>1</sup>H NMR (400 MHz, CDCl<sub>3</sub>)  $\delta$  7.47–7.32 (m, 3H), 7.16–7.05 (m, 2H), 6.11 (s, 1H), 5.79 (s, 1H), 1.99–1.86 (m, 1H), 1.79–1.64 (m, 1H), 1.37 (s, 3H), 1.23 (s, 9H), 0.89 (t, *J* = 7.4 Hz, 3H); <sup>13</sup>C{<sup>1</sup>H} NMR (100 MHz, CDCl<sub>3</sub>)  $\delta$  186.5, 135.7, 131.6, 129.1, 128.1, 127.5, 126.7, 118.3, 56.7, 53.7, 29.4, 22.2, 20.2, 8.4; HRMS (ESI-Orbitrap) *m/z*: [M + H]<sup>+</sup> Calcd for C<sub>18</sub>H<sub>25</sub>N<sub>2</sub>OS 317.1682; Found 317.1678.

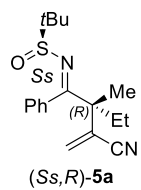

(*S*)-*N*-((*R, E*)-3-cyano-2-ethyl-2-methyl-1-phenylbut-3-en-1-ylidene)-2-methylpropane-2-sulfonamide ((*Ss, R*)-**5a**): According to the general procedure C, reaction was performed using enesulfonamide (*Ss, E*)-**1a** (26.6 mg, 0.100 mmol, 1.0 equiv), *t*BuOK in THF (1.0 M, 120  $\mu$ L, 0.12 mmol, 1.2 equiv), **4a** (41.6 mg, 0.201 mmol, 2.0 equiv), DBU (60.9 mg, 0.401 mmol, 4.0 equiv). Column chromatography (30% ethyl acetate/petroleum ether as eluent) afforded (*Ss, R*)-**5a** as a white solid (27.2 mg, 86%). Diastereomeric ratio was determined by  $^1\text{H}$  NMR analysis of the crude reaction mixture (dr = 25:1). Analytical data for (*Ss, R*)-**5a**:  $R_f$  = 0.25 (petroleum ether/ethyl acetate = 3/1); mp 55–57  $^\circ\text{C}$ ;  $[\alpha]_{\text{D}}^{25} = +112.4$  (*c* 0.24,  $\text{CH}_2\text{Cl}_2$ ); dr = 25:1 (diastereomeric ratio was determined by  $^1\text{H}$  NMR analysis of the crude reaction mixture);  $^1\text{H}$  NMR (400 MHz,  $\text{CDCl}_3$ )  $\delta$  7.43–7.31 (m, 3H), 7.15–7.08 (m, 2H), 6.10 (s, 1H), 5.74 (s, 1H), 2.13–2.02 (m, 1H), 2.02–1.91 (m, 1H), 1.29 (s, 3H), 1.24 (s, 9H), 0.92 (t,  $J$  = 7.6 Hz, 3H);  $^{13}\text{C}\{^1\text{H}\}$  NMR (100 MHz,  $\text{CDCl}_3$ )  $\delta$  185.9, 135.7, 132.0, 129.1, 128.0, 127.5, 126.8, 118.1, 56.8, 53.7, 29.3, 22.3, 20.5, 8.6; HRMS (ESI-Orbitrap)  $m/z$ :  $[\text{M} + \text{H}]^+$  Calcd for  $\text{C}_{18}\text{H}_{25}\text{N}_2\text{OS}$  317.1682; Found 317.1677.

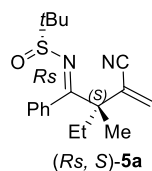

(*R*)-*N*-((*S, E*)-3-cyano-2-ethyl-2-methyl-1-phenylbut-3-en-1-ylidene)-2-methylpropane-2-sulfonamide ((*Rs, S*)-**5a**): According to the general procedure C, reaction was performed using enesulfonamide (*Rs, E*)-**1a** (26.6 mg, 0.100 mmol, 1.0 equiv), *t*BuOK in THF (1.0 M, 120  $\mu$ L, 0.12 mmol, 1.2 equiv), **4a** (41.6 mg, 0.201 mmol, 2.0 equiv), DBU (60.9 mg, 0.400 mmol, 4.0 equiv). Column chromatography (30% ethyl acetate/petroleum ether as eluent) afforded (*Rs, S*)-**5a** as a white solid (27.5 mg, 87%). Diastereomeric ratio was determined by  $^1\text{H}$  NMR analysis of the crude reaction mixture (dr > 20:1). Analytical data for (*Rs, S*)-**5a**:  $R_f$  = 0.25 (petroleum ether/ethyl acetate = 3/1); mp 61–62  $^\circ\text{C}$ ;  $[\alpha]_{\text{D}}^{25} = -107.3$  (*c* 0.21,  $\text{CH}_2\text{Cl}_2$ );  $^1\text{H}$  NMR (400 MHz,  $\text{CDCl}_3$ )  $\delta$  7.44–7.31 (m, 3H), 7.17–7.06 (m, 2H), 6.09 (s, 1H), 5.74 (s, 1H), 2.10–1.90 (m, 2H), 1.28 (s, 3H), 1.23 (s, 9H), 0.92 (t,  $J$  = 7.4 Hz, 3H);  $^{13}\text{C}\{^1\text{H}\}$  NMR (100 MHz,  $\text{CDCl}_3$ )  $\delta$  185.8, 135.7, 131.9, 129.1, 127.9, 127.4, 126.8, 118.0, 56.7, 53.6, 29.3, 22.3, 20.5, 8.5; HRMS (ESI-Orbitrap)  $m/z$ :  $[\text{M} + \text{H}]^+$  Calcd for  $\text{C}_{18}\text{H}_{25}\text{N}_2\text{OS}$  317.1682; Found 317.1680.

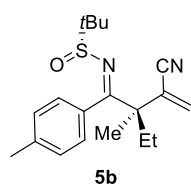

**5b**

(*R*)-*N*-((*R,E*)-3-cyano-2-ethyl-2-methyl-1-(*p*-tolyl)but-3-en-1-ylidene)-2-methylpropane-2-sulfonamide (**5b**): According to the general procedure C, reaction was performed using enesulfonamide **1b** (28.0 mg, 0.101 mmol, 1.0 equiv), *t*BuOK in THF (1.0 M, 120  $\mu$ L, 0.121 mmol, 1.2 equiv), **4a** (41.8 mg, 0.202 mmol, 2.0 equiv), DBU (60.9 mg, 0.400 mmol, 4.0 equiv). Column chromatography (30% ethyl acetate/petroleum ether as eluent) afforded **5b** as a pale yellow solid (29.1 mg, 88%). Diastereomeric ratio was determined by  $^1\text{H}$  NMR analysis of the crude reaction mixture (dr > 20:1). Analytical data for **5b**:  $R_f$  = 0.25 (petroleum ether/ethyl acetate = 3/1); mp 91–92  $^\circ\text{C}$ ;  $[\alpha]_D^{25} = -256.9$  (*c* 0.14,  $\text{CH}_2\text{Cl}_2$ );  $^1\text{H}$  NMR (400 MHz,  $\text{CDCl}_3$ )  $\delta$  7.22–7.15 (m, 2H), 7.03–6.99 (m, 2H), 6.10 (s, 1H), 5.79 (s, 1H), 2.36 (s, 3H), 1.97–1.86 (m, 1H), 1.79–1.69 (m, 1H), 1.37 (s, 3H), 1.23 (s, 9H), 0.88 (t,  $J = 7.4$  Hz, 3H);  $^{13}\text{C}\{^1\text{H}\}$  NMR (100 MHz,  $\text{CDCl}_3$ )  $\delta$  187.0, 139.1, 132.8, 131.5, 128.7, 127.7, 126.7, 118.4, 56.6, 53.8, 29.4, 22.2, 21.5, 20.2, 8.4; HRMS (ESI-Orbitrap)  $m/z$ :  $[\text{M} + \text{H}]^+$  Calcd for  $\text{C}_{19}\text{H}_{27}\text{N}_2\text{OS}$  331.1839; Found 331.1837.

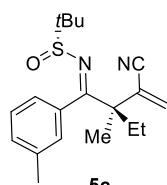

**5c**

(*R*)-*N*-((*R,E*)-3-cyano-2-ethyl-2-methyl-1-(*m*-tolyl)but-3-en-1-ylidene)-2-methylpropane-2-sulfonamide (**5c**): According to the general procedure C, reaction was performed using enesulfonamide **1c** (28.0 mg, 0.101 mmol, 1.0 equiv), *t*BuOK in THF (1.0 M, 120  $\mu$ L, 0.121 mmol, 1.2 equiv), **4a** (41.8 mg, 0.202 mmol, 2.0 equiv), DBU (60.9 mg, 0.400 mmol, 4.0 equiv). Column chromatography (30% ethyl acetate/petroleum ether as eluent) afforded **5c** as a pale yellow oil (25.1 mg, 76%). Diastereomeric ratio was determined by  $^1\text{H}$  NMR analysis of the crude reaction mixture (dr > 20:1). Analytical data for **5c**:  $R_f$  = 0.25 (petroleum ether/ethyl acetate = 3/1);  $[\alpha]_D^{25} = -87.2$  (*c* 0.23,  $\text{CH}_2\text{Cl}_2$ );  $^1\text{H}$  NMR (400 MHz,  $\text{CDCl}_3$ )  $\delta$  7.33–7.26 (m, 1H), 7.24–7.15 (m, 1H), 6.92 (s, 2H), 6.12 (s, 1H), 5.81 (s, 1H), 2.38 (s, 3H), 2.02–1.84 (m, 1H), 1.80–1.65 (m, 1H), 1.38 (s, 3H), 1.24 (s, 9H), 0.89 (t,  $J = 7.4$  Hz, 3H);  $^{13}\text{C}\{^1\text{H}\}$  NMR (100 MHz,  $\text{CDCl}_3$ )  $\delta$  187.2, 137.9, 135.7, 131.5, 129.9, 127.9, 127.6, 127.1, 124.0, 118.4, 56.5, 53.7, 29.4, 22.2, 21.7, 20.1, 8.4; HRMS (ESI-Orbitrap)  $m/z$ :  $[\text{M} + \text{H}]^+$  Calcd for  $\text{C}_{19}\text{H}_{27}\text{N}_2\text{OS}$  331.1839; Found 331.1836.

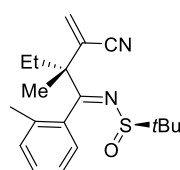

**5d**

(*R*)-*N*-((*R,Z*)-3-cyano-2-ethyl-2-methyl-1-(*o*-tolyl)but-3-en-1-ylidene)-2-methylpropane-2-sulfonamide (**5d**): According to the general procedure C, reaction was performed using enesulfonamide **1d** (28.0 mg, 0.101 mmol, 1.0 equiv), *t*BuOK in THF (1.0 M, 120  $\mu$ L, 0.121 mmol, 1.2 equiv), **4a** (41.8 mg,

0.202 mmol, 2.0 equiv), DBU (60.9 mg, 0.400 mmol, 4.0 equiv). Column chromatography (30% ethyl acetate/petroleum ether as eluent) afforded **5d** as a white solid (29.0 mg, 88%). Diastereomeric ratio was determined by HPLC analysis of the crude reaction mixture (dr = 96:4), HPLC (IG-3, *n*-hexane/*i*PrOH = 90/10, flow rate = 1.0 mL/min,  $\lambda = 254$  nm)  $t_R = 14.5$  min (major), 15.9 min (minor). Analytical data for **5d** (mixture of imino *Z/E* isomers):  $R_f = 0.25$  (petroleum ether/ethyl acetate = 3/1); mp 76–77 °C;  $[\alpha]_D^{25} = -146.7$  (*c* 0.19, CH<sub>2</sub>Cl<sub>2</sub>); <sup>1</sup>H NMR (400 MHz, CDCl<sub>3</sub>)  $\delta$  7.32–7.26 (m, 1H), 7.25–7.13 (m, 2H), 7.06–6.87 (m, 1H), 6.15 (d, *J* = 1.6 Hz, 1H), 5.84 (d, *J* = 10.4 Hz, 1H), 2.28 (d, *J* = 11.2 Hz, 3H), 2.11–1.98 (m, 1H), 1.83–1.61 (m, 1H), 1.35 (s, 3H), 1.24 (d, *J* = 11.2 Hz, 9H), 0.92–0.81 (m, 3H); <sup>13</sup>C{<sup>1</sup>H} NMR (100 MHz, CDCl<sub>3</sub>)  $\delta$  188.6, 186.5, 136.2, 135.2, 134.9, 133.6, 131.8, 131.6, 130.7, 130.4, 129.2, 129.1, 127.9, 127.7, 127.4, 126.1, 125.2, 125.0, 118.6, 118.3, 56.9, 56.8, 54.3, 53.5, 30.6, 28.9, 22.4, 22.2, 21.5, 20.5, 20.4, 19.6, 8.4, 8.3; HRMS (ESI-Orbitrap) *m/z*: [M + H]<sup>+</sup> Calcd for C<sub>19</sub>H<sub>27</sub>N<sub>2</sub>OS 331.1839; Found 331.1837.

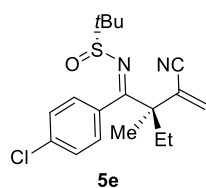

(*R*)-*N*-((*R,E*)-1-(4-chlorophenyl)-3-cyano-2-ethyl-2-methylbut-3-en-1-ylidene)-2-methylpropane-2-sulfonamide (**5e**): According to the general procedure C, reaction was performed using enesulfonamide **1e** (29.9 mg, 0.100 mmol, 1.0 equiv), *t*BuOK in THF (1.0 M, 120  $\mu$ L, 0.120 mmol, 1.2 equiv), **4a**

(42.0 mg, 0.202 mmol, 2.0 equiv), DBU (60.9 mg, 0.400 mmol, 4.0 equiv). Column chromatography (30% ethyl acetate/petroleum ether as eluent) afforded **5e** as a white solid (29.5 mg, 84%). Diastereomeric ratio was determined by <sup>1</sup>H NMR analysis of the crude reaction mixture (dr > 20:1). Analytical data for **5e**:  $R_f = 0.25$  (petroleum ether/ethyl acetate = 3/1); mp 107–108 °C;  $[\alpha]_D^{25} = -166.6$  (*c* 0.22, CH<sub>2</sub>Cl<sub>2</sub>); <sup>1</sup>H NMR (400 MHz, CDCl<sub>3</sub>)  $\delta$  7.26 (d, *J* = 8.4 Hz, 2H), 6.97 (d, *J* = 8.8 Hz, 2H), 6.01 (s, 1H), 5.68 (s, 1H), 1.91–1.75 (m, 1H), 1.69–1.56 (m, 1H), 1.25 (s, 3H), 1.14 (s, 9H), 0.79 (t, *J* = 7.4 Hz, 3H); <sup>13</sup>C{<sup>1</sup>H} NMR (100 MHz, CDCl<sub>3</sub>)  $\delta$  184.6, 135.4, 133.9, 131.7, 128.4, 128.2, 127.4, 118.1, 57.1, 53.8, 29.3, 22.3, 20.2, 8.4; HRMS (ESI-Orbitrap) *m/z*: [M + H]<sup>+</sup> Calcd for C<sub>18</sub>H<sub>24</sub>ClN<sub>2</sub>OS 351.1292; Found 351.1291.

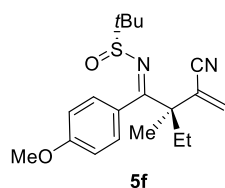

(*R*)-*N*-((*R,E*)-3-cyano-2-ethyl-1-(4-methoxyphenyl)-2-methylbut-3-en-1-ylidene)-2-methylpropane-2-sulfonamide (**5f**): According to the general procedure C, reaction was performed using enesulfonamide **1f** (29.5 mg, 0.100 mmol, 1.0 equiv), *t*BuOK in THF (1.0 M, 120  $\mu$ L, 0.120 mmol, 1.2 equiv), **4a** (42.0 mg, 0.202 mmol, 2.0 equiv), DBU (60.9 mg, 0.400 mmol, 4.0 equiv). Column



chromatography (30% ethyl acetate/petroleum ether as eluent) afforded **5f** as a pale yellow oil (24.6 mg, 71%). Diastereomeric ratio was determined by <sup>1</sup>H NMR analysis of the crude reaction mixture (dr > 20:1). Analytical data for **5f**: *R<sub>f</sub>* = 0.25 (petroleum ether/ethyl acetate = 3/1); [ $\alpha$ ]<sub>D</sub><sup>25</sup> = -111.0 (*c* 0.13, CH<sub>2</sub>Cl<sub>2</sub>); <sup>1</sup>H NMR (400 MHz, CDCl<sub>3</sub>)  $\delta$  7.12–6.98 (m, 2H), 6.94–6.86 (m, 2H), 6.10 (s, 1H), 5.79 (s, 1H), 3.82 (s, 3H), 1.96–1.85 (m, 1H), 1.79–1.69 (m, 1H), 1.37 (s, 3H), 1.23 (s, 9H), 0.89 (t, *J* = 7.4 Hz, 3H); <sup>13</sup>C{<sup>1</sup>H} NMR (100 MHz, CDCl<sub>3</sub>)  $\delta$  187.0, 160.0, 131.4, 128.4, 128.0, 127.8, 118.4, 113.5, 56.6, 55.3, 53.9, 29.5, 22.3, 20.4, 8.5; HRMS (ESI-Orbitrap) *m/z*: [M + H]<sup>+</sup> Calcd for C<sub>19</sub>H<sub>27</sub>N<sub>2</sub>O<sub>2</sub>S 347.1788; Found 347.1785.

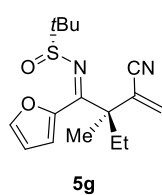

(*R*)-*N*-((*R,Z*)-3-cyano-2-ethyl-1-(furan-2-yl)-2-methylbut-3-en-1-ylidene)-2-methylpropane-2-sulfinamide (**5g**): According to the general procedure C, reaction was performed using enesulfinamide **1g** (29.5 mg, 0.115 mmol, 1.0 equiv), *t*BuOK in THF (1.0 M, 140  $\mu$ L, 0.138 mmol, 1.2 equiv), **4a** (47.6 mg, 0.230 mmol, 2.0 equiv), DBU (70.1 mg, 0.460 mmol, 4.0 equiv). Column chromatography (30% ethyl acetate/petroleum ether as eluent) afforded **5g** as a pale yellow oil (28.9 mg, 82%). Diastereomeric ratio was determined by <sup>1</sup>H NMR analysis of the crude reaction mixture (dr > 20:1). Analytical data for **5g**: *R<sub>f</sub>* = 0.25 (petroleum ether/ethyl acetate = 3/1); [ $\alpha$ ]<sub>D</sub><sup>25</sup> = -218.2 (*c* 0.11, CH<sub>2</sub>Cl<sub>2</sub>); <sup>1</sup>H NMR (400 MHz, CDCl<sub>3</sub>)  $\delta$  7.54–7.51 (m, 1H), 7.24–7.22 (m, 1H), 6.53–6.49 (m, 1H), 6.04 (s, 1H), 5.78 (s, 1H), 2.13–2.01 (m, 1H), 1.97–1.86 (m, 1H), 1.48 (s, 3H), 1.30 (s, 9H), 0.89 (t, *J* = 7.4 Hz, 3H); <sup>13</sup>C{<sup>1</sup>H} NMR (100 MHz, CDCl<sub>3</sub>)  $\delta$  172.2, 146.4, 144.6, 130.6, 128.9, 120.0, 118.0, 112.0, 57.5, 53.1, 30.2, 22.5, 22.4, 8.6; HRMS (ESI-Orbitrap) *m/z*: [M + H]<sup>+</sup> Calcd for C<sub>16</sub>H<sub>23</sub>N<sub>2</sub>O<sub>2</sub>S 307.1475; Found 307.1472.

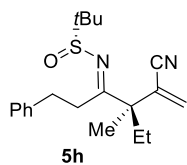

(*R*)-*N*-((*R,E*)-5-cyano-4-ethyl-4-methyl-1-phenylhex-5-en-3-ylidene)-2-methylpropane-2-sulfinamide (**5h**): According to the general procedure D, reaction was performed using enesulfinamide **1h** (29.4 mg, 0.101 mmol, 1.0 equiv), lithium bis(trimethylsilyl)amide in THF (1.0 M, 120  $\mu$ L, 0.120 mmol, 1.2 equiv), **4b** (66.5 mg, 0.202 mmol, 2.0 equiv), DBU (60.9 mg, 0.400 mmol, 4.0 equiv). Column chromatography (20% ethyl acetate/petroleum ether as eluent) afforded as a pale yellow oil (23.0 mg, 67%). Diastereomeric ratio was determined by HPLC analysis of the crude reaction mixture (dr = 97:3), HPLC (IC-3, *n*-hexane/*i*PrOH = 90/10, flow rate = 1.0 mL/min,  $\lambda$  = 254 nm) *t<sub>R</sub>* = 13.8 min (minor), 19.7 min (major). Analytical data for **5h**: *R<sub>f</sub>* = 0.20 (petroleum ether/ethyl acetate = 4/1);

$[\alpha]_D^{25} = -178.4$  (*c* 0.13, CH<sub>2</sub>Cl<sub>2</sub>); <sup>1</sup>H NMR (400 MHz, CDCl<sub>3</sub>)  $\delta$  7.32–7.27 (m, 4H), 7.24–7.16 (m, 1H), 6.12 (s, 1H), 5.85 (s, 1H), 3.30–3.19 (m, 1H), 3.19–3.10 (m, 1H), 2.84–2.74 (m, 1H), 2.68–2.59 (m, 1H), 1.99–1.80 (m, 2H), 1.35 (s, 3H), 1.33 (s, 9H), 0.89 (t, *J* = 7.6 Hz, 3H); <sup>13</sup>C{<sup>1</sup>H} NMR (100 MHz, CDCl<sub>3</sub>)  $\delta$  184.3, 140.6, 131.2, 128.7, 128.5, 128.3, 126.5, 117.9, 58.1, 54.6, 34.0, 33.8, 28.9, 22.9, 20.1, 8.6; HRMS (ESI-Orbitrap) *m/z*: [M + H]<sup>+</sup> Calcd for C<sub>20</sub>H<sub>29</sub>N<sub>2</sub>O<sub>3</sub>S 345.1995; Found 345.1994.

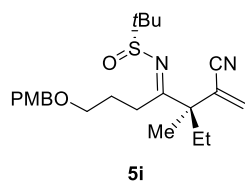

(*R*)-*N*-((*R,E*)-2-cyano-3-ethyl-7-((4-methoxybenzyl)oxy)-3-methylhept-1-en-4-ylidene)-2-methylpropane-2-sulfinamide (**5i**): According to the general procedure D, reaction was performed using enesulfinamide **1i** (36.7 mg, 0.101 mmol, 1.0 equiv), lithium bis(trimethylsilyl)amide in THF (1.0

M, 120  $\mu$ L, 0.120 mmol, 1.2 equiv), **4b** (66.5 mg, 0.202 mmol, 2.0 equiv), DBU (60.9 mg, 0.400 mmol, 4.0 equiv). Column chromatography (25% ethyl acetate/petroleum ether as eluent) afforded **5i** as a pale yellow oil (28.8 mg, 69%). Diastereomeric ratio was determined by HPLC analysis of the crude reaction mixture (*dr* = 97:3), HPLC (ID-3, *n*-hexane/*i*PrOH = 87/13, flow rate = 1.0 mL/min,  $\lambda$  = 254 nm)  $t_R$  = 14.6 min (minor), 15.7 min (major). Analytical data for **5i**:  $R_f$  = 0.20 (petroleum ether/ethyl acetate = 3/1);  $[\alpha]_D^{25} = -42.6$  (*c* 0.14, CH<sub>2</sub>Cl<sub>2</sub>); <sup>1</sup>H NMR (400 MHz, CDCl<sub>3</sub>)  $\delta$  7.26–7.19 (m, 2H), 6.92–6.80 (m, 2H), 6.07 (s, 1H), 5.81 (s, 1H), 4.42 (s, 2H), 3.80 (s, 3H), 3.56–3.42 (m, 2H), 2.98–2.86 (m, 1H), 2.57–2.44 (m, 1H), 2.15–1.96 (m, 1H), 1.92–1.78 (m, 3H), 1.32 (s, 3H), 1.27 (s, 9H), 0.85 (t, *J* = 7.4 Hz, 3H); <sup>13</sup>C{<sup>1</sup>H} NMR (100 MHz, CDCl<sub>3</sub>)  $\delta$  <sup>13</sup>C 185.9, 159.3, 131.1, 130.6, 129.4, 128.3, 118.0, 113.9, 72.7, 69.8, 57.8, 55.4, 54.6, 28.8, 28.7, 28.4, 22.8, 20.0, 8.6; HRMS (ESI-Orbitrap) *m/z*: [M + H]<sup>+</sup> Calcd for C<sub>23</sub>H<sub>35</sub>N<sub>2</sub>O<sub>3</sub>S 419.2363; Found 419.2356.

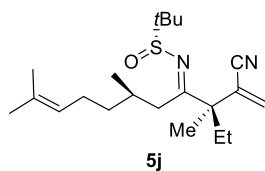

(*R*)-*N*-((*3R,6R,E*)-2-cyano-3-ethyl-3,6,10-trimethylundeca-1,9-dien-4-ylidene)-2-methylpropane-2-sulfinamide (**5j**): According to the general procedure D, reaction was performed using enesulfinamide **1j** (31.3 mg, 0.101 mmol, 1.0 equiv), lithium bis(trimethylsilyl)amide in

THF (1.0 M, 120  $\mu$ L, 0.120 mmol, 1.2 equiv), **4b** (66.5 mg, 0.202 mmol, 2.0 equiv), DBU (60.9 mg, 0.400 mmol, 4.0 equiv). Column chromatography (25% ethyl acetate/petroleum ether as eluent) afforded **5j** as a pale yellow oil (27.7 mg, 76%). Diastereomeric ratio was determined by HPLC analysis of the crude reaction mixture (*dr* = 97:3), HPLC (IF-3, *n*-hexane/*i*PrOH = 98/02, flow rate = 1.0 mL/min,  $\lambda$  = 254 nm)  $t_R$  = 15.2 min (major), 16.4 min (minor). Analytical data for **5j**:  $R_f$  = 0.20

(petroleum ether/ethyl acetate = 3/1);  $[\alpha]_D^{25} = -138.9$  ( $c$  0.14,  $\text{CH}_2\text{Cl}_2$ );  $^1\text{H NMR}$  (400 MHz,  $\text{CDCl}_3$ )  $\delta$  6.06 (s, 1H), 5.79 (s, 1H), 5.09–5.01 (m, 1H), 3.17–3.08 (m, 1H), 2.42–2.34 (m, 1H), 2.18–2.06 (m, 1H), 2.06–1.81 (m, 4H), 1.67 (s, 3H), 1.59 (s, 3H), 1.39–1.33 (m, 1H), 1.32 (s, 3H), 1.26 (s, 9H), 1.24–1.18 (m, 1H), 1.02 (d,  $J = 6.8$  Hz, 3H), 0.86 (t,  $J = 7.4$  Hz, 3H);  $^{13}\text{C}\{^1\text{H}\}$  NMR (100 MHz,  $\text{CDCl}_3$ )  $\delta$  186.8, 131.9, 130.7, 128.8, 124.2, 118.1, 57.7, 54.6, 38.2, 37.6, 32.0, 29.4, 25.9, 25.7, 22.7, 20.7, 19.7, 17.9, 8.6; HRMS (ESI-Orbitrap)  $m/z$ :  $[\text{M} + \text{H}]^+$  Calcd for  $\text{C}_{21}\text{H}_{37}\text{N}_2\text{OS}$  365.2621; Found 365.2620.

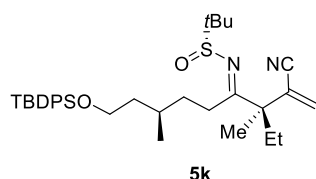

(*R*)-*N*-((3*R*,7*R*,*E*)-9-((tert-butylidiphenylsilyl)oxy)-2-cyano-3-ethyl-3,7-dimethylnon-1-en-4-ylidene)-2-methylpropane-2-

sulfonamide (**5k**): According to the general procedure D, reaction was performed using enesulfonamide **1k** (26.5 mg, 0.051 mmol, 1.0

equiv), lithium bis(trimethylsilyl)amide in THF (1.0 M, 60  $\mu\text{L}$ , 0.060 mmol, 1.2 equiv), **4b** (33.4 mg, 0.102 mmol, 2.0 equiv), DBU (31.0 mg, 0.204 mmol, 4.0 equiv). Column chromatography (20% ethyl acetate/petroleum ether as eluent) afforded **5k** as a pale yellow oil (21.8 mg, 74%). Diastereomeric ratio was determined by HPLC analysis of the crude reaction mixture (dr = 94:6), HPLC (ID-3, *n*-hexane/*i*PrOH = 90/10, flow rate = 1.0 mL/min,  $\lambda = 254$  nm)  $t_R = 5.0$  min (minor), 5.2 min (major). Analytical data for **5k**:  $R_f = 0.30$  (petroleum ether/ethyl acetate = 4/1);  $[\alpha]_D^{25} = -85.6$  ( $c$  0.21,  $\text{CH}_2\text{Cl}_2$ );  $^1\text{H NMR}$  (400 MHz,  $\text{CDCl}_3$ )  $\delta$  7.76–7.57 (m, 4H), 7.47–7.31 (m, 6H), 6.05 (s, 1H), 5.79 (s, 1H), 3.78–3.60 (m, 2H), 3.06–2.93 (m, 1H), 2.34–2.20 (m, 1H), 1.91–1.74 (m, 2H), 1.65–1.54 (m, 2H), 1.50–1.33 (m, 3H), 1.31 (s, 3H), 1.27 (s, 9H), 1.04 (s, 9H), 0.91–0.82 (m, 6H);  $^{13}\text{C}\{^1\text{H}\}$  NMR (100 MHz,  $\text{CDCl}_3$ )  $\delta$  186.6, 135.7, 134.1, 130.9, 129.7, 128.5, 127.7, 118.0, 62.1, 57.6, 54.6, 39.2, 34.2, 30.4, 29.4, 28.9, 27.0, 22.7, 20.0, 19.3, 19.2, 8.6; HRMS (ESI-Orbitrap)  $m/z$ :  $[\text{M} + \text{H}]^+$  Calcd for  $\text{C}_{34}\text{H}_{51}\text{N}_2\text{O}_2\text{SSi}$  579.3435; Found 579.3429.

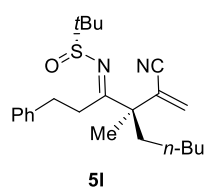

(*R*)-*N*-((*R*,*E*)-4-(1-cyanovinyl)-4-methyl-1-phenylnonan-3-ylidene)-2-

methylpropane-2-sulfonamide (**5l**): According to the general procedure D, reaction was performed using enesulfonamide **1l** (25.5 mg, 0.076 mmol, 1.0 equiv), lithium bis(trimethylsilyl)amide in THF (1.0 M, 90  $\mu\text{L}$ , 0.091 mmol, 1.2

equiv), **4b** (49.7 mg, 0.152 mmol, 2.0 equiv), DBU (46.9 mg, 0.308 mmol, 4.0 equiv). Column chromatography (20% ethyl acetate/petroleum ether as eluent) afforded **5l** as a pale yellow oil (24.1 mg, 82%). Diastereomeric ratio was determined by  $^1\text{H NMR}$  analysis of the crude reaction mixture

(dr > 20:1). Analytical data for **5l**:  $R_f = 0.30$  (petroleum ether/ethyl acetate = 4/1);  $[\alpha]_D^{25} = -118.6$  ( $c$  0.17,  $\text{CH}_2\text{Cl}_2$ );  $^1\text{H NMR}$  (400 MHz,  $\text{CDCl}_3$ )  $\delta$  7.33–7.27 (m, 4H), 7.24–7.15 (m, 1H), 6.10 (s, 1H), 5.84 (s, 1H), 3.29–3.07 (m, 2H), 2.87–2.73 (m, 1H), 2.69–2.56 (m, 1H), 1.88–1.66 (m, 2H), 1.37 (s, 3H), 1.32 (s, 9H), 1.31–1.15 (m, 6H), 0.92–0.83 (m, 3H);  $^{13}\text{C}\{^1\text{H}\}$  NMR (100 MHz,  $\text{CDCl}_3$ )  $\delta$  184.4, 140.6, 130.8, 128.71, 128.66, 128.5, 126.5, 118.0, 58.1, 54.3, 36.2, 34.0, 33.8, 32.3, 23.9, 22.9, 22.6, 20.7, 14.1; HRMS (ESI-Orbitrap)  $m/z$ :  $[\text{M} + \text{H}]^+$  Calcd for  $\text{C}_{23}\text{H}_{35}\text{N}_2\text{OS}$  387.2465; Found 387.2460.

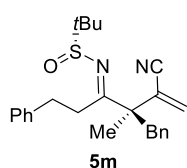

(*R*)-*N*-((*R,E*)-4-benzyl-5-cyano-4-methyl-1-phenylhex-5-en-3-ylidene)-2-methylpropane-2-sulfonamide (**5m**): According to the general procedure D, reaction was performed using enesulfonamide **1m** (35.5 mg, 0.100 mmol, 1.0 equiv), lithium bis(trimethylsilyl)amide in THF (1.0 M, 120  $\mu\text{L}$ , 0.120 mmol, 1.2

equiv), **4b** (49.7 mg, 0.200 mmol, 2.0 equiv), DBU (60.9 mg, 0.400 mmol, 4.0 equiv). Column chromatography (20% ethyl acetate/petroleum ether as eluent) afforded **5m** as a pale yellow oil (31.3 mg, 77%). Diastereomeric ratio was determined by  $^1\text{H NMR}$  analysis of the crude reaction mixture (dr > 20:1). Analytical data for **5m**:  $R_f = 0.30$  (petroleum ether/ethyl acetate = 4/1);  $[\alpha]_D^{25} = -168.4$  ( $c$  0.17,  $\text{CH}_2\text{Cl}_2$ );  $^1\text{H NMR}$  (400 MHz,  $\text{CDCl}_3$ )  $\delta$  7.26–7.06 (m, 10H), 6.04 (s, 1H), 5.63 (s, 1H), 3.39–3.28 (m, 1H), 3.28–3.17 (m, 1H), 3.15–3.04 (m, 2H), 2.79–2.69 (m, 1H), 2.68–2.59 (m, 1H), 1.27 (s, 9H), 1.25 (s, 3H);  $^{13}\text{C}\{^1\text{H}\}$  NMR (100 MHz,  $\text{CDCl}_3$ )  $\delta$  183.0, 140.5, 135.7, 132.0, 130.7, 128.7, 128.6, 128.3, 127.5, 127.1, 126.6, 118.2, 58.5, 55.4, 42.1, 34.0, 33.6, 23.0, 20.2; HRMS (ESI-Orbitrap)  $m/z$ :  $[\text{M} + \text{H}]^+$  Calcd for  $\text{C}_{25}\text{H}_{31}\text{N}_2\text{OS}$  407.2152; Found 407.2147.

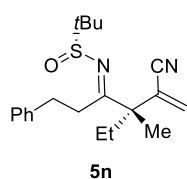

(*R*)-*N*-((*S,E*)-5-cyano-4-ethyl-4-methyl-1-phenylhex-5-en-3-ylidene)-2-methylpropane-2-sulfonamide (**5n**): According to the general procedure D, reaction was performed using enesulfonamide **1n** (29.3 mg, 0.100 mmol, 1.0 equiv), lithium bis(trimethylsilyl)amide in THF (1.0 M, 120  $\mu\text{L}$ , 0.120 mmol, 1.2

equiv), **4b** (65.4 mg, 0.200 mmol, 2.0 equiv), DBU (60.9 mg, 0.401 mmol, 4.0 equiv). Column chromatography (20% ethyl acetate/petroleum ether as eluent) afforded **5n** as a pale yellow oil (26.5 mg, 77%). Diastereomeric ratio was determined by HPLC analysis of the crude reaction mixture (dr = 94.5:5.5), HPLC (IC-3, *n*-hexane/*i*PrOH = 90/10, flow rate = 1.0 mL/min,  $\lambda = 254$  nm)  $t_R = 13.4$  min (major), 19.6 min (minor). Analytical data for **5n**:  $R_f = 0.30$  (petroleum ether/ethyl acetate = 4/1);  $[\alpha]_D^{25} = -177.0$  ( $c$  0.18,  $\text{CH}_2\text{Cl}_2$ );  $^1\text{H NMR}$  (400 MHz,  $\text{CDCl}_3$ )  $\delta$  7.31–7.25 (m, 4H), 7.24–7.15

(m, 1H), 6.13 (s, 1H), 5.86 (s, 1H), 3.17–3.04 (m, 2H), 2.92–2.82 (m, 1H), 2.76–2.67 (m, 1H), 1.96–1.88 (m, 2H), 1.36 (s, 3H), 1.33 (s, 9H), 0.89 (t,  $J = 7.4$  Hz, 3H);  $^{13}\text{C}\{^1\text{H}\}$  NMR (100 MHz,  $\text{CDCl}_3$ )  $\delta$  184.4, 140.7, 131.2, 128.7, 128.5, 128.2, 126.5, 118.0, 58.1, 54.7, 34.4, 34.3, 29.0, 22.9, 20.6, 8.7; HRMS (ESI-Orbitrap)  $m/z$ :  $[\text{M} + \text{H}]^+$  Calcd for  $\text{C}_{20}\text{H}_{29}\text{N}_2\text{OS}$  345.1995; Found 345.1992.

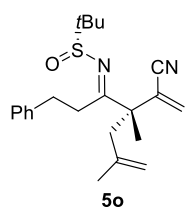

(*R*)-*N*-((*S,E*)-4-(1-cyanovinyl)-4,6-dimethyl-1-phenylhept-6-en-3-ylidene)-2-methylpropane-2-sulfonamide (**5o**): According to the general procedure D, reaction was performed using enesulfonamide **1o** (32.0 mg, 0.102 mmol, 1.0 equiv), lithium bis(trimethylsilyl)amide in THF (1.0 M, 120  $\mu\text{L}$ , 0.120 mmol, 1.2 equiv), **4b** (66.7 mg, 0.204 mmol, 2.0 equiv), DBU (61.2 mg, 0.404 mmol, 4.0 equiv). Column chromatography (20% ethyl acetate/petroleum ether as eluent) afforded **5o** as a pale yellow oil (25.9 mg, 70%). Diastereomeric ratio was determined by HPLC analysis of the crude reaction mixture (dr = 97.5:2.5), HPLC (AD-3, *n*-hexane/*i*PrOH = 95/05, flow rate = 1.0 mL/min,  $\lambda = 254$  nm)  $t_{\text{R}} = 10.0$  min (minor), 14.2 min (major). Analytical data for **5o**:  $R_f = 0.30$  (petroleum ether/ethyl acetate = 4/1);  $[\alpha]_{\text{D}}^{25} = -146.5$  ( $c$  0.15,  $\text{CH}_2\text{Cl}_2$ );  $^1\text{H}$  NMR (400 MHz,  $\text{CDCl}_3$ )  $\delta$  7.32–7.26 (m, 4H), 7.24–7.16 (m, 1H), 6.15 (s, 1H), 5.91 (s, 1H), 5.01–4.90 (m, 1H), 4.79–4.75 (m, 1H), 3.12–2.91 (m, 3H), 2.85–2.74 (m, 1H), 2.74–2.57 (m, 2H), 1.75 (s, 3H), 1.41 (s, 3H), 1.35 (s, 9H);  $^{13}\text{C}\{^1\text{H}\}$  NMR (100 MHz,  $\text{CDCl}_3$ )  $\delta$  184.4, 140.7, 140.5, 131.5, 128.7, 128.55, 128.48, 126.6, 118.2, 116.9, 58.1, 54.0, 44.3, 34.9, 24.7, 22.9, 21.0; HRMS (ESI-Orbitrap)  $m/z$ :  $[\text{M} + \text{H}]^+$  Calcd for  $\text{C}_{22}\text{H}_{31}\text{N}_2\text{OS}$  371.2152; Found 371.2147.

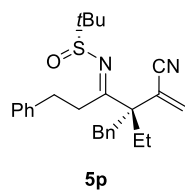

(*R*)-*N*-((*S,E*)-4-benzyl-5-cyano-4-ethyl-1-phenylhex-5-en-3-ylidene)-2-methylpropane-2-sulfonamide (**5p**): According to the general procedure D, reaction was performed using enesulfonamide **1p** (36.9 mg, 0.100 mmol, 1.0 equiv), lithium bis(trimethylsilyl)amide in THF (1.0 M, 120  $\mu\text{L}$ , 0.120 mmol, 1.2 equiv), **4b** (65.4 mg, 0.200 mmol, 2.0 equiv), DBU (60.9 mg, 0.400 mmol, 4.0 equiv). Column chromatography (20% ethyl acetate/petroleum ether as eluent) afforded **5p** as a colorless solid (28.6 mg, 68%). Diastereomeric ratio was determined by  $^1\text{H}$  NMR analysis of the crude reaction mixture (dr = 20:1). Analytical data for **5p**:  $R_f = 0.30$  (petroleum ether/ethyl acetate = 4/1); mp 110–111  $^{\circ}\text{C}$ ;  $[\alpha]_{\text{D}}^{25} = -87.7$  ( $c$  0.19,  $\text{CH}_2\text{Cl}_2$ );  $^1\text{H}$  NMR (400 MHz,  $\text{CDCl}_3$ )  $\delta$  7.30–7.26 (m, 1H), 7.26–7.22 (m, 5H), 7.22–7.14 (m, 2H), 7.14–7.09 (m, 2H), 6.15 (s, 1H), 5.69 (s, 1H), 3.25–3.06 (m, 4H), 2.93–2.81 (m, 1H), 2.67–2.53 (m, 1H), 1.82–1.69 (m, 1H), 1.69–1.59 (m, 1H), 1.34

(s, 9H), 0.99 (t,  $J = 7.4$  Hz, 3H);  $^{13}\text{C}\{^1\text{H}\}$  NMR (100 MHz,  $\text{CDCl}_3$ )  $\delta$  183.3, 140.7, 136.2, 132.6, 130.4, 128.7, 128.5, 128.3, 127.1, 126.9, 126.5, 118.2, 59.0, 58.0, 37.6, 35.0, 34.0, 23.7, 23.0, 8.8; HRMS (ESI-Orbitrap)  $m/z$ :  $[\text{M} + \text{H}]^+$  Calcd for  $\text{C}_{26}\text{H}_{33}\text{N}_2\text{OS}$  421.2308; Found 421.2299.

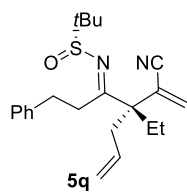

(*R*)-*N*-((*S,E*)-4-(1-cyanovinyl)-4-ethyl-1-phenylhept-6-en-3-ylidene)-2-methylpropane-2-sulfonamide (**5q**): According to the general procedure D, reaction was performed using enesulfonamide **1q** (32.0 mg, 0.102 mmol, 1.0 equiv), lithium bis(trimethylsilyl)amide in THF (1.0 M, 120  $\mu\text{L}$ , 0.120 mmol, 1.2 equiv), **4b** (66.7 mg, 0.204 mmol, 2.0 equiv), DBU (61.2 mg, 0.404 mmol, 4.0 equiv). Column chromatography (20% ethyl acetate/petroleum ether as eluent) afforded **5q** as a pale yellow oil (29.6 mg, 80%). Diastereomeric ratio was determined by HPLC analysis of the crude reaction mixture (dr = 95:5), HPLC (AD-3, *n*-hexane/*i*PrOH = 90/10, flow rate = 1.0 mL/min,  $\lambda = 254$  nm)  $t_R = 8.4$  min (minor), 11.0 min (major). Analytical data for **5q**:  $R_f = 0.30$  (petroleum ether/ethyl acetate = 4/1);  $[\alpha]_D^{25} = -147.5$  ( $c$  0.19,  $\text{CH}_2\text{Cl}_2$ );  $^1\text{H}$  NMR (400 MHz,  $\text{CDCl}_3$ )  $\delta$  7.31–7.26 (m, 4H), 7.24–7.13 (m, 1H), 6.22 (s, 1H), 5.91 (s, 1H), 5.64–5.47 (m, 1H), 5.21–5.10 (m, 2H), 3.25–3.08 (m, 2H), 2.88–2.75 (m, 1H), 2.69–2.53 (m, 3H), 2.01–1.84 (m, 1H), 1.83–1.70 (m, 1H), 1.35 (s, 9H), 0.85 (t,  $J = 7.4$  Hz, 3H);  $^{13}\text{C}\{^1\text{H}\}$  NMR (100 MHz,  $\text{CDCl}_3$ )  $\delta$  182.8, 140.7, 132.2, 132.1, 128.7, 128.5, 127.1, 126.5, 119.6, 117.7, 58.1, 57.6, 36.1, 34.4, 33.8, 24.8, 23.0, 8.2; HRMS (ESI-Orbitrap)  $m/z$ :  $[\text{M} + \text{H}]^+$  Calcd for  $\text{C}_{22}\text{H}_{31}\text{N}_2\text{OS}$  371.2152; Found 371.2149.

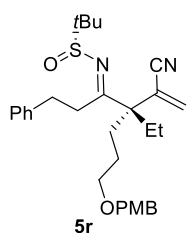

(*R*)-*N*-((*S,E*)-4-(1-cyanovinyl)-4-ethyl-7-((4-methoxybenzyl)oxy)-1-phenylheptan-3-ylidene)-2-methylpropane-2-sulfonamide (**5r**): According to the general procedure D, reaction was performed using enesulfonamide **1r** (45.7 mg, 0.100 mmol, 1.0 equiv), lithium bis(trimethylsilyl)amide in THF (1.0 M, 120  $\mu\text{L}$ , 0.120 mmol, 1.2 equiv), **4b** (65.4 mg, 0.200 mmol, 2.0 equiv), DBU (60.8 mg, 0.400 mmol, 4.0 equiv). Column chromatography (20% ethyl acetate/petroleum ether as eluent) afforded **5r** as a pale yellow oil (41.0 mg, 81%). Diastereomeric ratio was determined by HPLC analysis of the crude reaction mixture (dr = 98:2), HPLC (ID-3, *n*-hexane/*i*PrOH = 90/10, flow rate = 1.0 mL/min,  $\lambda = 254$  nm)  $t_R = 19.5$  min (major), 23.5 min (minor). Analytical data for **5r**:  $R_f = 0.30$  (petroleum ether/ethyl acetate = 4/1);  $[\alpha]_D^{25} = -137.6$  ( $c$  0.13,  $\text{CH}_2\text{Cl}_2$ );  $^1\text{H}$  NMR (400 MHz,  $\text{CDCl}_3$ )  $\delta$  7.30–7.26 (m, 1H), 7.25–7.16 (m, 6H), 6.89–6.82 (m, 2H), 6.19 (s, 1H), 5.92 (s, 1H), 4.43 (s, 2H), 3.79 (s, 3H), 3.52–3.37 (m, 2H), 3.25–3.08 (m, 2H), 2.88–2.71 (m, 1H), 2.65–2.52 (m, 1H),

2.05–1.88 (m, 2H), 1.86–1.72 (m, 2H), 1.51–1.40 (m, 2H), 1.34 (s, 9H), 0.82 (t,  $J = 7.4$  Hz, 3H);  $^{13}\text{C}\{^1\text{H}\}$  NMR (100 MHz,  $\text{CDCl}_3$ )  $\delta$  183.0, 159.3, 140.8, 132.3, 130.5, 129.4, 128.7, 128.5, 127.4, 126.4, 117.9, 113.9, 72.9, 69.7, 58.2, 57.8, 55.4, 34.3, 33.7, 27.9, 25.2, 24.4, 23.0, 8.2; HRMS (ESI-Orbitrap)  $m/z$ :  $[\text{M} + \text{H}]^+$  Calcd for  $\text{C}_{30}\text{H}_{41}\text{N}_2\text{O}_3\text{S}$  509.2832; Found 509.2823.

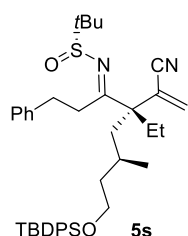

(*R*)-*N*-((4*S*,6*R*,*E*)-8-((*tert*-butyldiphenylsilyloxy)-4-(1-cyanovinyl)-4-ethyl-6-methyl-1-phenyloctan-3-ylidene)-2-methylpropane-2-sulfinamide (**5s**):

According to the general procedure D, reaction was performed using enesulfinamide **1s** (30.2 mg, 0.051 mmol, 1.0 equiv), lithium bis(trimethylsilyl)amide in THF (1.0 M, 60  $\mu\text{L}$ , 0.062 mmol, 1.2 equiv), **4b** (33.0 mg, 0.102 mmol, 2.0 equiv), DBU (31.0 mg, 0.204 mmol, 4.0 equiv). Column chromatography (20% ethyl acetate/petroleum ether as eluent) afforded **5s** as a pale yellow oil (24.0 mg, 72%). Diastereomeric ratio was determined by HPLC analysis of the crude reaction mixture (dr = 99:1), HPLC (ID-3, *n*-hexane/*i*PrOH = 95/05, flow rate = 1.0 mL/min,  $\lambda = 254$  nm)  $t_R = 9.2$  min (minor), 9.9 min (major). Analytical data for **5s**:  $R_f = 0.30$  (petroleum ether/ethyl acetate = 4/1);  $[\alpha]_D^{25} = -77.2$  (*c* 0.18,  $\text{CH}_2\text{Cl}_2$ );  $^1\text{H}$  NMR (400 MHz,  $\text{CDCl}_3$ )  $\delta$  7.67–7.58 (m, 4H), 7.43–7.32 (m, 6H), 7.26–7.13 (m, 5H), 6.18 (s, 1H), 5.89 (s, 1H), 3.74–3.55 (m, 2H), 3.23–2.98 (m, 2H), 2.90–2.77 (m, 1H), 2.71–2.57 (m, 1H), 2.01–1.80 (m, 2H), 1.74–1.51 (m, 4H), 1.31 (s, 9H), 1.28–1.19 (m, 1H), 1.02 (s, 9H), 0.90–0.74 (m, 6H);  $^{13}\text{C}\{^1\text{H}\}$  NMR (100 MHz,  $\text{CDCl}_3$ )  $\delta$  183.4, 140.9, 135.64, 135.63, 133.90, 133.88, 131.9, 129.8, 128.7, 128.5, 128.3, 127.8, 126.5, 61.5, 58.2, 58.1, 41.6, 38.9, 34.6, 34.3, 27.0, 25.1, 25.0, 23.0, 21.1, 19.3, 8.7; HRMS (ESI-Orbitrap)  $m/z$ :  $[\text{M} + \text{H}]^+$  Calcd for  $\text{C}_{40}\text{H}_{55}\text{N}_2\text{O}_2\text{SSi}$  655.3748; Found 655.3735.

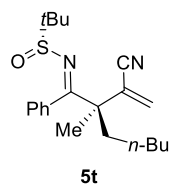

(*R*)-*N*-((*R*,*E*)-2-(1-cyanovinyl)-2-methyl-1-phenylheptylidene)-2-methylpropane-2-sulfinamide (**5t**): According to the general procedure C, reaction was performed using enesulfinamide **1t** (30.7 mg, 0.100 mmol, 1.0 equiv), *t*BuOK in THF (1.0 M, 120  $\mu\text{L}$ , 0.12 mmol, 1.2 equiv), **4a** (41.6 mg, 0.201 mmol, 2.0 equiv),

DBU (60.9 mg, 0.401 mmol, 4.0 equiv). Column chromatography (30% ethyl acetate/petroleum ether as eluent) afforded **5t** as a yellow oil (29.4 mg, 82%). Diastereomeric ratio was determined by  $^1\text{H}$  NMR analysis of the crude reaction mixture (dr > 20:1). Analytical data for **5t**:  $R_f = 0.25$  (petroleum ether/ethyl acetate = 3/1);  $[\alpha]_D^{25} = -189.2$  (*c* 0.14,  $\text{CH}_2\text{Cl}_2$ );  $^1\text{H}$  NMR (400 MHz,  $\text{CDCl}_3$ )  $\delta$  7.46–7.32 (m, 3H), 7.18–7.06 (m, 2H), 6.09 (s, 1H), 5.79 (s, 1H), 1.91–1.76 (m, 1H), 1.72–1.56

(m, 1H), 1.39 (s, 3H), 1.35–1.08 (m, 15H), 0.86 (t,  $J = 6.8$  Hz, 3H);  $^{13}\text{C}\{^1\text{H}\}$  NMR (100 MHz,  $\text{CDCl}_3$ )  $\delta$  186.6, 135.7, 131.3, 129.2, 128.1, 128.0, 126.8, 118.4, 56.7, 53.4, 36.6, 32.2, 23.8, 22.6, 22.3, 20.9, 14.1 ; HRMS (ESI-Orbitrap)  $m/z$ :  $[\text{M} + \text{H}]^+$  Calcd for  $\text{C}_{21}\text{H}_{31}\text{N}_2\text{OS}$  359.2152; Found 359.2149.

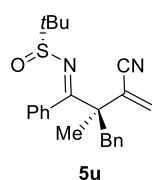

(*R*)-*N*-((*R,E*)-2-benzyl-3-cyano-2-methyl-1-phenylbut-3-en-1-ylidene)-2-methyl-propane-2-sulfonamide (**5u**): According to the general procedure C, reaction was performed using enesulfonamide **1u** (32.7 mg, 0.100 mmol, 1.0 equiv), *t*BuOK in THF (1.0 M, 120  $\mu\text{L}$ , 0.12 mmol, 1.2 equiv), **4a** (41.6 mg, 0.201 mmol, 2.0 equiv), DBU (60.9 mg, 0.401 mmol, 4.0 equiv). Column chromatography (30% ethyl acetate/petroleum ether as eluent) afforded **5u** as a pale yellow oil (29.1 mg, 77%). Diastereomeric ratio was determined by HPLC analysis of the crude reaction mixture (dr = 99:1), HPLC (IG-3, *n*-hexane/*i*PrOH = 80/20, flow rate = 1.0 mL/min,  $\lambda = 254$  nm)  $t_{\text{R}} = 8.2$  min (major), 12.8 min (minor). Analytical data for **5u**:  $R_f = 0.25$  (petroleum ether/ethyl acetate = 3/1);  $[\alpha]_{\text{D}}^{25} = -82.2$  ( $c$  0.16,  $\text{CH}_2\text{Cl}_2$ );  $^1\text{H}$  NMR (400 MHz,  $\text{CDCl}_3$ )  $\delta$  7.46–7.39 (m, 3H), 7.26 (s, 1H), 7.26–7.21 (m, 2H), 7.21–7.12 (m, 4H), 6.02 (s, 1H), 5.51 (s, 1H), 3.34 (d,  $J = 13.6$  Hz, 1H), 2.96 (d,  $J = 13.6$  Hz, 1H), 1.29 (s, 9H), 1.28 (s, 3H);  $^{13}\text{C}\{^1\text{H}\}$  NMR (100 MHz,  $\text{CDCl}_3$ )  $\delta$  185.8, 135.7, 135.5, 132.2, 130.8, 129.2, 128.20, 128.17, 127.1, 126.9, 126.8, 119.0, 57.1, 54.7, 42.7, 22.4, 20.8; HRMS (ESI-Orbitrap)  $m/z$ :  $[\text{M} + \text{H}]^+$  Calcd for  $\text{C}_{23}\text{H}_{27}\text{N}_2\text{OS}$  379.1839 ; Found 379.1833.

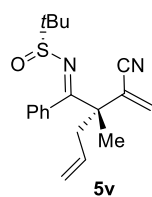

(*R*)-*N*-((*S,E*)-2-(1-cyanovinyl)-2-methyl-1-phenylpent-4-en-1-ylidene)-2-methyl-propane-2-sulfonamide (**5v**): According to the general procedure C, reaction was performed using enesulfonamide **1v** (27.7 mg, 0.100 mmol, 1.0 equiv), *t*BuOK in THF (1.0 M, 120  $\mu\text{L}$ , 0.12 mmol, 1.2 equiv), **4a** (41.6 mg, 0.201 mmol, 2.0 equiv), DBU (60.9 mg, 0.401 mmol, 4.0 equiv). Column chromatography (25% ethyl acetate/petroleum ether as eluent) afforded **5v** as a colorless oil (25.3 mg, 78%). Diastereomeric ratio was determined by  $^1\text{H}$  NMR analysis of the crude reaction mixture (dr > 20:1). Analytical data for **5v**:  $R_f = 0.25$  (petroleum ether/ethyl acetate = 3/1);  $[\alpha]_{\text{D}}^{25} = -79.7$  ( $c$  0.18,  $\text{CH}_2\text{Cl}_2$ );  $^1\text{H}$  NMR (400 MHz,  $\text{CDCl}_3$ )  $\delta$  7.45–7.32 (m, 3H), 7.18–7.09 (m, 2H), 6.09 (s, 1H), 5.77–5.63 (m, 2H), 5.30–5.06 (m, 2H), 2.86–2.77 (m, 1H), 2.74–2.63 (m, 1H), 1.28 (s, 3H), 1.24 (s, 9H);  $^{13}\text{C}\{^1\text{H}\}$  NMR (100 MHz,  $\text{CDCl}_3$ )  $\delta$  185.5, 135.4, 132.3, 132.2, 129.2, 128.0, 127.0, 126.9, 120.0, 118.0, 56.7, 53.0, 41.0, 22.3, 21.1; HRMS (ESI-Orbitrap)  $m/z$ :  $[\text{M} + \text{H}]^+$  Calcd for  $\text{C}_{19}\text{H}_{25}\text{N}_2\text{OS}$  329.1682; Found 329.1677.



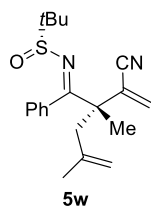

(*R*)-*N*-((*S,E*)-2-(1-cyanovinyl)-2,4-dimethyl-1-phenylpent-4-en-1-ylidene)-2-methylpropane-2-sulfonamide (**5w**): According to the general procedure C, reaction was performed using enesulfonamide **1w** (29.1 mg, 0.100 mmol, 1.0 equiv), *t*BuOK in THF (1.0 M, 120  $\mu$ L, 0.12 mmol, 1.2 equiv), **4a** (41.6 mg, 0.201 mmol, 2.0 equiv), DBU (60.9 mg, 0.401 mmol, 4.0 equiv). Column chromatography (25% ethyl acetate/petroleum ether as eluent) afforded **5w** as a colorless oil (30.1 mg, 88%). Diastereomeric ratio was determined by  $^1\text{H}$  NMR analysis of the crude reaction mixture (dr > 20:1). Analytical data for **5w**:  $R_f$  = 0.25 (petroleum ether/ethyl acetate = 3/1);  $[\alpha]_D^{25} = -272.2$  (*c* 0.17,  $\text{CH}_2\text{Cl}_2$ );  $^1\text{H}$  NMR (400 MHz,  $\text{CDCl}_3$ )  $\delta$  7.45–7.33 (m, 3H), 7.16–7.09 (m, 2H), 6.09 (s, 1H), 5.73 (s, 1H), 4.97–4.92 (m, 1H), 4.83–4.79 (m, 1H), 2.92–2.71 (m, 2H), 1.77 (s, 3H), 1.29 (s, 3H), 1.25 (s, 9H);  $^{13}\text{C}\{^1\text{H}\}$  NMR (100 MHz,  $\text{CDCl}_3$ )  $\delta$  186.1, 140.8, 135.5, 132.3, 129.2, 128.0, 127.8, 127.0, 118.3, 116.9, 56.6, 53.1, 44.3, 24.8, 22.2, 21.0; HRMS (ESI-Orbitrap)  $m/z$ :  $[\text{M} + \text{H}]^+$  Calcd for  $\text{C}_{20}\text{H}_{27}\text{N}_2\text{OS}$  343.1839; Found 343.1835.

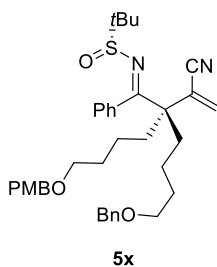

(*R*)-*N*-((*E*)-6-(benzyloxy)-2-(1-cyanovinyl)-2-(4-((4-methoxybenzyl)oxy)butyl)-1-phenylhexylidene)-2-methylpropane-2-sulfonamide (**5x**): According to the general procedure C, reaction was performed using enesulfonamide **1x** (45.0 mg, 0.081 mmol, 1.0 equiv), *t*BuOK in THF (1.0 M, 100  $\mu$ L, 0.097 mmol, 1.2 equiv), **4a** (33.5 mg, 0.162 mmol, 2.0 equiv), DBU (49.2 mg, 0.324 mmol, 4.0 equiv). Column chromatography (35% ethyl acetate/petroleum ether as eluent) afforded **5x** as a colorless oil (40.3 mg, 79%). Diastereomeric ratio was determined by HPLC analysis of the crude reaction mixture (dr = 98:2), HPLC (IC-3, *n*-hexane/*i*PrOH = 80/20, flow rate = 1.0 mL/min,  $\lambda = 254$  nm)  $t_R$  = 29.0 min (minor), 30.4min (major). Analytical data for **5x**:  $R_f$  = 0.25 (petroleum ether/ethyl acetate = 3/1);  $[\alpha]_D^{25} = -285.1$  (*c* 0.16,  $\text{CH}_2\text{Cl}_2$ );  $^1\text{H}$  NMR (400 MHz,  $\text{CDCl}_3$ )  $\delta$  7.40–7.26 (m, 8H), 7.24 (s, 2H), 7.14–7.07 (m, 2H), 6.90–6.84 (m, 2H), 6.11 (s, 1H), 5.69 (s, 1H), 4.47 (s, 2H), 4.41 (s, 2H), 3.79 (s, 3H), 3.50–3.38 (m, 4H), 2.01–1.78 (m, 2H), 1.74–1.57 (m, 6H), 1.42–1.27 (m, 4H), 1.23 (s, 9H);  $^{13}\text{C}\{^1\text{H}\}$  NMR (100 MHz,  $\text{CDCl}_3$ )  $\delta$  184.3, 159.2, 138.5, 135.6, 132.9, 130.7, 129.4, 129.2, 128.5, 128.0, 127.8, 127.7, 126.9, 126.7, 118.1, 113.9, 73.1, 69.8, 69.5, 56.9, 56.6, 55.4, 31.9, 31.6, 30.0, 22.4, 20.6, 20.5; HRMS (ESI-Orbitrap)  $m/z$ :  $[\text{M} + \text{H}]^+$  Calcd for  $\text{C}_{38}\text{H}_{49}\text{N}_2\text{O}_4\text{S}$  629.3408; Found 629.3395.

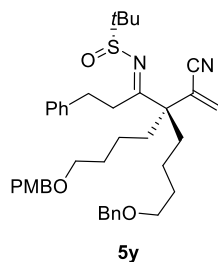

*(R)*-*N*-((*E*)-8-(benzyloxy)-4-(1-cyanovinyl)-4-(4-(4-methoxybenzyl)oxy)butyl)-1-phenyloctan-3-ylidene)-2-methylpropane-2-sulfonamide (**5y**): According to the general procedure D, reaction was performed using enesulfonamide **1y** (48.4 mg, 0.080 mmol, 1.0 equiv), lithium bis(trimethylsilyl)amide in THF (1.0 M, 100  $\mu$ L, 0.096 mmol, 1.2 equiv), **4b** (52.4 mg, 0.160 mmol, 2.0 equiv), DBU (48.7 mg, 0.321 mmol, 4.0 equiv). Column chromatography (30% ethyl acetate/petroleum ether as eluent) afforded **5y** as a pale yellow oil (38.8 mg, 74%). Diastereomeric ratio was determined by HPLC analysis of the crude reaction mixture (dr = 95.5:4.5), HPLC (IG-3, *n*-hexane/*i*PrOH = 85/15, flow rate = 1.0 mL/min,  $\lambda$  = 254 nm)  $t_R$  = 34.7 min (minor), 35.9 min (major). Analytical data for **5y**:  $R_f$  = 0.30 (petroleum ether/ethyl acetate = 4/1);  $[\alpha]_D^{25} = -248.1$  (*c* 0.22, CH<sub>2</sub>Cl<sub>2</sub>); <sup>1</sup>H NMR (400 MHz, CDCl<sub>3</sub>)  $\delta$  7.38–7.30 (m, 5H), 7.29–7.27 (m, 4H), 7.25 (s, 1H), 7.23–7.17 (m, 2H), 6.90–6.83 (m, 2H), 6.17 (s, 1H), 5.87 (s, 1H), 4.47 (s, 2H), 4.41 (s, 2H), 3.79 (s, 3H), 3.48–3.39 (m, 4H), 3.20–3.10 (m, 2H), 2.84–2.74 (m, 1H), 2.66–2.58 (m, 1H), 1.93–1.74 (m, 4H), 1.68–1.59 (m, 4H), 1.34 (s, 9H), 1.28–1.19 (m, 4H); <sup>13</sup>C{<sup>1</sup>H} NMR (100 MHz, CDCl<sub>3</sub>)  $\delta$  183.1, 159.2, 140.7, 138.5, 132.0, 130.6, 129.3, 128.7, 128.49, 128.45, 127.7, 127.6, 127.5, 126.5, 117.9, 113.8, 73.0, 72.7, 69.8, 69.5, 58.2, 57.6, 55.3, 34.2, 34.0, 32.2, 31.8, 30.1, 23.0, 20.62, 20.58; HRMS (ESI-Orbitrap)  $m/z$ : [M + H]<sup>+</sup> Calcd for C<sub>40</sub>H<sub>53</sub>N<sub>2</sub>O<sub>4</sub>S 657.3721; Found 657.3717.

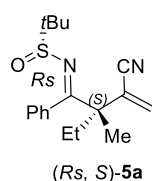

*(R)*-*N*-((*S,E*)-3-cyano-2-ethyl-2-methyl-1-phenylbut-3-en-1-ylidene)-2-methylpropane-2-sulfonamide ((*R,S, S*)-**5a**): According to the general procedure C, reaction was performed using *N*-*tert*-Butanesulfonyl ketimine (*R,S, S*)-**1a** (26.5 mg, 0.100 mmol, 1.0 equiv), *t*BuOK in THF (1.0 M, 120  $\mu$ L, 0.120 mmol, 1.2 equiv), **4a** (41.6 mg, 0.201 mmol, 2.0 equiv), DBU (60.9 mg, 0.402 mmol, 4.0 equiv). Column chromatography (25% ethyl acetate/petroleum ether as eluent) afforded (*R,S, S*)-**5a** as a white solid (29.1 mg, 92%). Diastereomeric ratio was determined by <sup>1</sup>H NMR analysis of the crude reaction mixture (dr > 20:1). Analytical data for (*R,S, S*)-**5a**:  $R_f$  = 0.25 (petroleum ether/ethyl acetate = 3/1); mp 60–61 °C;  $[\alpha]_D^{25} = -104.2$  (*c* 0.17, CH<sub>2</sub>Cl<sub>2</sub>); <sup>1</sup>H NMR (400 MHz, CDCl<sub>3</sub>)  $\delta$  7.43–7.33 (m, 3H), 7.17–7.07 (m, 2H), 6.10 (s, 1H), 5.74 (s, 1H), 2.12–1.91 (m, 2H), 1.29 (s, 3H), 1.24 (s, 9H), 0.92 (t,  $J$  = 7.4 Hz, 3H); <sup>13</sup>C{<sup>1</sup>H} NMR (100 MHz, CDCl<sub>3</sub>)  $\delta$  186.5, 135.7, 131.5, 129.1, 128.1, 127.6, 126.8, 118.3, 56.7,

53.7, 29.4, 22.3, 20.2, 8.4; HRMS (ESI-Orbitrap)  $m/z$ :  $[M + H]^+$  Calcd for  $C_{18}H_{25}N_2OS$  317.1682; Found 317.1680.

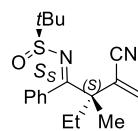

(*S*)-*N*-((*S,E*)-3-cyano-2-ethyl-2-methyl-1-phenylbut-3-en-1-ylidene)-2-

methylpropane-2-sulfonamide ((*S*<sub>S</sub>, *S*)-**5a**): According to the general procedure C, (*S*<sub>S</sub>, *S*)-**5a** reaction was performed using *N*-*tert*-Butanesulfinyl ketimine (*S*<sub>S</sub>, *S*)-**1a** (26.5 mg, 0.100 mmol, 1.0 equiv), *t*BuOK in THF (1.0 M, 120  $\mu$ L, 0.120 mmol, 1.2 equiv), **4a** (41.6 mg, 0.201 mmol, 2.0 equiv), DBU (60.9 mg, 0.402 mmol, 4.0 equiv). Column chromatography (25% ethyl acetate/petroleum ether as eluent) afforded (*S*<sub>S</sub>, *S*)-**5a** as a white solid (26.6 mg, 84%). Diastereomeric ratio was determined by <sup>1</sup>H NMR analysis of the crude reaction mixture (dr > 20:1). Analytical data for (*S*<sub>S</sub>, *S*)-**5a**:  $R_f$  = 0.25 (petroleum ether/ethyl acetate = 3/1); mp 56–57 °C;  $[\alpha]_D^{25} = +140.8$  (*c* 0.21, CH<sub>2</sub>Cl<sub>2</sub>); <sup>1</sup>H NMR (400 MHz, CDCl<sub>3</sub>)  $\delta$  7.39 (s, 3H), 7.16–7.07 (m, 2H), 6.11 (s, 1H), 5.79 (s, 1H), 2.00–1.86 (m, 1H), 1.79–1.66 (m, 1H), 1.37 (s, 3H), 1.23 (s, 9H), 0.89 (t, *J* = 7.4 Hz, 3H); <sup>13</sup>C{<sup>1</sup>H} NMR (100 MHz, CDCl<sub>3</sub>)  $\delta$  186.5, 135.7, 131.6, 129.1, 128.1, 127.5, 126.7, 118.3, 56.7, 53.7, 29.4, 22.2, 20.1, 8.4; HRMS (ESI-Orbitrap)  $m/z$ :  $[M + H]^+$  Calcd for  $C_{18}H_{25}N_2OS$  317.1682; Found 317.1680.

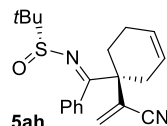

(*R*)-*N*-((*E*)-((*R*)-1-(1-cyanovinyl)cyclohex-3-en-1-yl)(phenyl)methylene)-2-

methylpropane-2-sulfonamide (**5ah**): According to the general procedure C, reaction was performed using *N*-*tert*-Butanesulfinyl ketimine (*R*<sub>S</sub>, *R*)-**1ah** (28.9 mg, 0.100 mmol, 1.0 equiv), *t*BuOK in THF (1.0 M, 120  $\mu$ L, 0.120 mmol, 1.2 equiv), **4a** (41.6 mg, 0.201 mmol, 2.0 equiv), DBU (60.9 mg, 0.402 mmol, 4.0 equiv). Column chromatography (20% ethyl acetate/petroleum ether as eluent) afforded **5ah** as a colorless oil (29.3 mg, 86%). Diastereomeric ratio was determined by <sup>1</sup>H NMR analysis of the crude reaction mixture (dr = 20:1). Analytical data for **5ah**  $R_f$  = 0.25 (petroleum ether/ethyl acetate = 3/1);  $[\alpha]_D^{25} = -145.2$  (*c* 0.24, CH<sub>2</sub>Cl<sub>2</sub>); <sup>1</sup>H NMR (400 MHz, CDCl<sub>3</sub>)  $\delta$  7.43–7.32 (m, 3H), 7.15–7.09 (m, 2H), 6.14 (s, 1H), 5.73 (s, 1H), 5.72–5.64 (m, 1H), 5.60–5.53 (m, 1H), 2.51–2.38 (m, 1H), 2.34–2.14 (m, 4H), 2.07–1.93 (m, 1H), 1.23 (s, 9H); <sup>13</sup>C{<sup>1</sup>H} NMR (100 MHz, CDCl<sub>3</sub>)  $\delta$  185.5, 135.7, 133.5, 129.6, 128.3, 128.0, 127.2, 125.0, 123.0, 118.1, 56.9, 52.2, 31.9, 29.1, 22.9, 22.5; HRMS (ESI-Orbitrap)  $m/z$ :  $[M + H]^+$  Calcd for  $C_{20}H_{25}N_2OS$  341.1682; Found 341.1678.

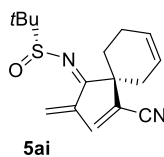

(*R*)-*N*-((*E*)-1-((*R*)-1-(1-cyanovinyl)cyclohex-3-en-1-yl)-2-methylallylidene)-2-methylpropane-2-sulfinamide (**5ai**): According to the general procedure C, reaction was performed using *N*-*tert*-Butanesulfinyl ketimine (*R<sub>S</sub>*, *R*)-**1ai** (25.3 mg, 0.100 mmol, 1.0 equiv), *t*BuOK in THF (1.0 M, 120  $\mu$ L, 0.120 mmol, 1.2 equiv), **4a** (41.6 mg, 0.201 mmol, 2.0 equiv), DBU (60.9 mg, 0.402 mmol, 4.0 equiv). Column chromatography (20% ethyl acetate/petroleum ether as eluent) afforded **5ai** as a colorless oil (25.7 mg, 83%). Diastereomeric ratio was determined by <sup>1</sup>H NMR analysis of the crude reaction mixture (dr = 12:1). Analytical data for **5ai** *R<sub>f</sub>* = 0.25 (petroleum ether/ethyl acetate = 3/1); [ $\alpha$ ]<sub>D</sub><sup>25</sup> = -194.3 (c 0.18, CH<sub>2</sub>Cl<sub>2</sub>); <sup>1</sup>H NMR (400 MHz, CDCl<sub>3</sub>)  $\delta$  6.14 (s, 1H) (6.12), 5.84 (s, 1H), 5.70–5.59 (m, 2H), 5.18 (s, 1H), 4.83 (s, 1H), 2.59–2.33 (m, 2H), 2.25–2.05 (m, 3H), 1.97 (s, 4H), 1.25 (s, 9H); <sup>13</sup>C{<sup>1</sup>H} NMR (100 MHz, CDCl<sub>3</sub>)  $\delta$  186.9, 141.2, 132.7 (132.3), 127.4 (127.2), 125.1, 122.9 (123.2), 117.8, 117.1, 56.7, 51.1, 31.5, 28.6, 24.5, 22.5, 22.4; HRMS (ESI-Orbitrap) *m/z*: [M + H]<sup>+</sup> Calcd for C<sub>17</sub>H<sub>25</sub>N<sub>2</sub>OS 305.1682; Found 305.1677.

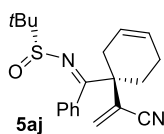

(*R*)-*N*-((*E*)-1-((*S*)-1-(1-cyanovinyl)cyclohex-3-en-1-yl)(phenyl)methylene)-2-methylpropane-2-sulfinamide (**5aj**): According to the general procedure C, reaction was performed using *N*-*tert*-Butanesulfinyl ketimine (*R<sub>S</sub>*, *S*)-**1aj** (28.9 mg, 0.100 mmol, 1.0 equiv), *t*BuOK in THF (1.0 M, 120  $\mu$ L, 0.120 mmol, 1.2 equiv), **4a** (41.6 mg, 0.201 mmol, 2.0 equiv), DBU (60.9 mg, 0.402 mmol, 4.0 equiv). Column chromatography (20% ethyl acetate/petroleum ether as eluent) afforded **5aj** as a colorless oil (28.6 mg, 84%). Diastereomeric ratio was determined by <sup>1</sup>H NMR analysis of the crude reaction mixture (dr > 20:1). Analytical data for **5aj** *R<sub>f</sub>* = 0.25 (petroleum ether/ethyl acetate = 3/1); [ $\alpha$ ]<sub>D</sub><sup>25</sup> = -216.7 (c 0.17, CH<sub>2</sub>Cl<sub>2</sub>); <sup>1</sup>H NMR (400 MHz, CDCl<sub>3</sub>)  $\delta$  7.44–7.34 (m, 3H), 7.18–7.09 (m, 2H), 6.14 (s, 1H), 5.79 (s, 1H), 5.70–5.57 (m, 2H), 2.58–2.48 (m, 1H), 2.37–2.27 (m, 1H), 2.23–2.07 (m, 2H), 2.06–1.90 (m, 2H), 1.24 (s, 9H); <sup>13</sup>C{<sup>1</sup>H} NMR (100 MHz, CDCl<sub>3</sub>)  $\delta$  184.7, 135.4, 132.6, 129.2, 128.0, 127.1, 126.8, 124.9, 123.1, 118.0, 57.0, 52.0, 31.6, 28.8, 22.4, 22.3; HRMS (ESI-Orbitrap) *m/z*: [M + H]<sup>+</sup> Calcd for C<sub>20</sub>H<sub>25</sub>N<sub>2</sub>OS 341.1682; Found 341.1676.

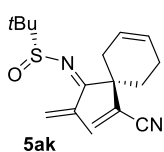

(*R*)-*N*-((*E*)-1-((*S*)-1-(1-cyanovinyl)cyclohex-3-en-1-yl)-2-methylallylidene)-2-methylpropane-2-sulfinamide (**5ak**): According to the general procedure C, reaction was performed using *N*-*tert*-Butanesulfinyl ketimine (*R<sub>S</sub>*, *S*)-**1ak** (25.3 mg, 0.100 mmol, 1.0 equiv), *t*BuOK in THF (1.0 M, 120  $\mu$ L, 0.120 mmol, 1.2 equiv), **4a** (41.6 mg, 0.201

mmol, 2.0 equiv), DBU (60.9 mg, 0.402 mmol, 4.0 equiv). Column chromatography (20% ethyl acetate/petroleum ether as eluent) afforded **5ak** as a colorless oil (25.9 mg, 85%). Diastereomeric ratio was determined by  $^1\text{H}$  NMR analysis of the crude reaction mixture (dr > 20:1). Analytical data for **5ak**  $R_f = 0.25$  (petroleum ether/ethyl acetate = 3/1);  $[\alpha]_D^{25} = -270.6$  (c 0.20,  $\text{CH}_2\text{Cl}_2$ );  $^1\text{H}$  NMR (400 MHz,  $\text{CDCl}_3$ )  $\delta$  6.12 (s, 1H), 5.85 (s, 1H), 5.65 (s, 2H), 5.18 (s, 1H), 4.85 (s, 1H), 2.57–2.48 (m, 1H), 2.44–2.35 (m, 1H), 2.21–2.10 (m, 1H), 2.11–2.03 (m, 2H), 1.98 (s, 4H), 1.25 (s, 9H);  $^{13}\text{C}\{^1\text{H}\}$  NMR (100 MHz,  $\text{CDCl}_3$ )  $\delta$  186.6, 141.2, 132.3, 127.2, 125.2, 123.2, 117.9, 116.8, 56.8, 51.0, 31.6, 28.7, 24.3, 22.44, 22.41; HRMS (ESI-Orbitrap)  $m/z$ :  $[\text{M} + \text{H}]^+$  Calcd for  $\text{C}_{17}\text{H}_{25}\text{N}_2\text{OS}$  305.1682; Found 305.1678.

## References

- (S1) Yisimayili, N.; Liu, H.; Yao, Y.; Lu, C.-D. Stereodivergent Construction of Vicinal Acyclic Quaternary–Tertiary Carbon Stereocenters by Michael-Type Alkylation of  $\alpha,\alpha$ -Disubstituted *N-tert*-Butanesulfinyl Ketimines. *Org. Lett.* **2021**, *23*, 7450.
- (S2) Yisimayili, N.; Zhu, C.-L.; Liu, T.; Lu, C.-D. Stereoselective Construction of Acyclic  $\beta,\beta$ -Disubstituted Enesulfonamides via Conjugate Addition of Organocuprates to  $\alpha$ -Substituted  $\alpha,\beta$ -Unsaturated *N*-Sulfinyl Ketimines. *Org. Lett.* **2023**, *25*, 5536.
- (S3) Choudhury, A. R.; Manna, M. S.; Mukherjee, S. Nitro-enabled catalytic enantioselective formal umpolung alkenylation of  $\beta$ -ketoesters. *Chem. Sci.* **2017**, *8*, 6686.
- (S4) Kammer, L. M.; Lipp, B.; Opatz, T. Photoredox Alkenylation of Carboxylic Acids and Peptides: Synthesis of Covalent Enzyme Inhibitors. *J. Org. Chem.* **2019**, *84*, 2379.
- (S5) Corr, M. J.; Cormanich, R. A.; von Hahmann, C. N.; Bühl, M.; Cordes, D. B.; Slawin, A. M. Z.; O'Hagan, D. *Org. Biomol. Chem.*, **2016**, *14*, 211.
- (S6) Sheng, S.-R.; Zhou, W.; Zhong, M.-H.; Liu, X.-L.; Song, C.-S. Facile Method for Solid-Phase Synthesis of Vinyl Sulfones Using Polystyrene-Supported Selenomethyl Aryl Sulfone. *Synth. Commun.* **2005**, *35*, 815.

**<sup>1</sup>H and <sup>13</sup>C NMR spectra for S1-S6**

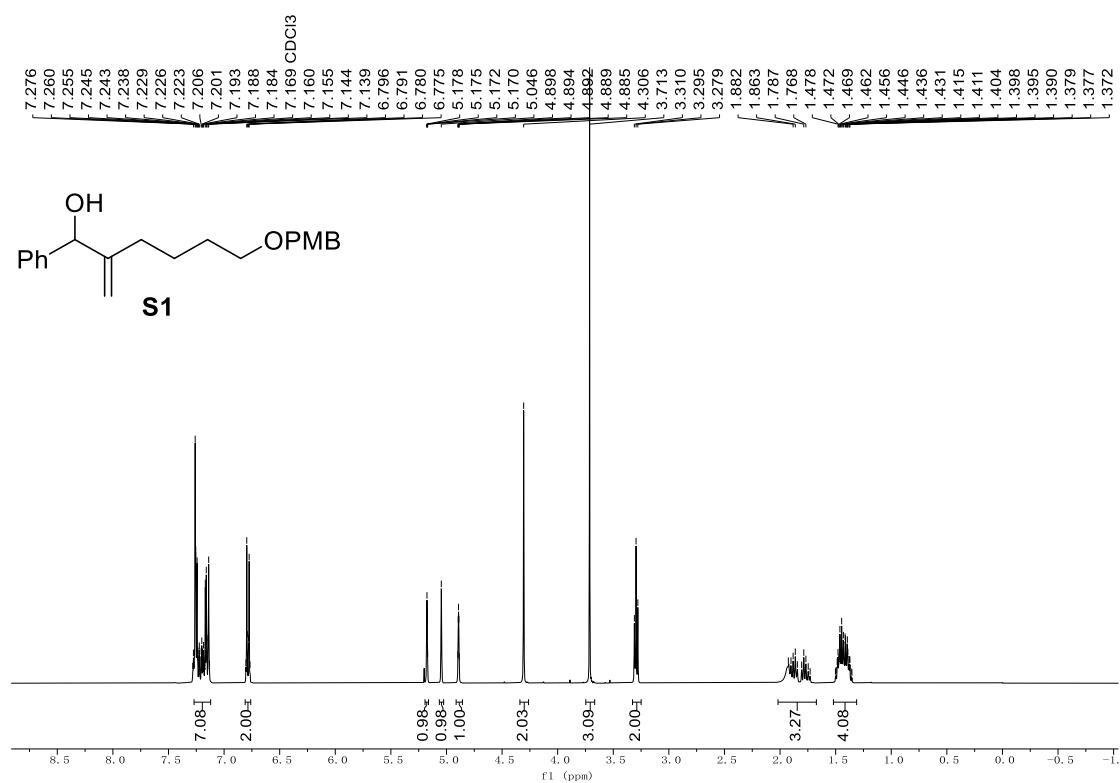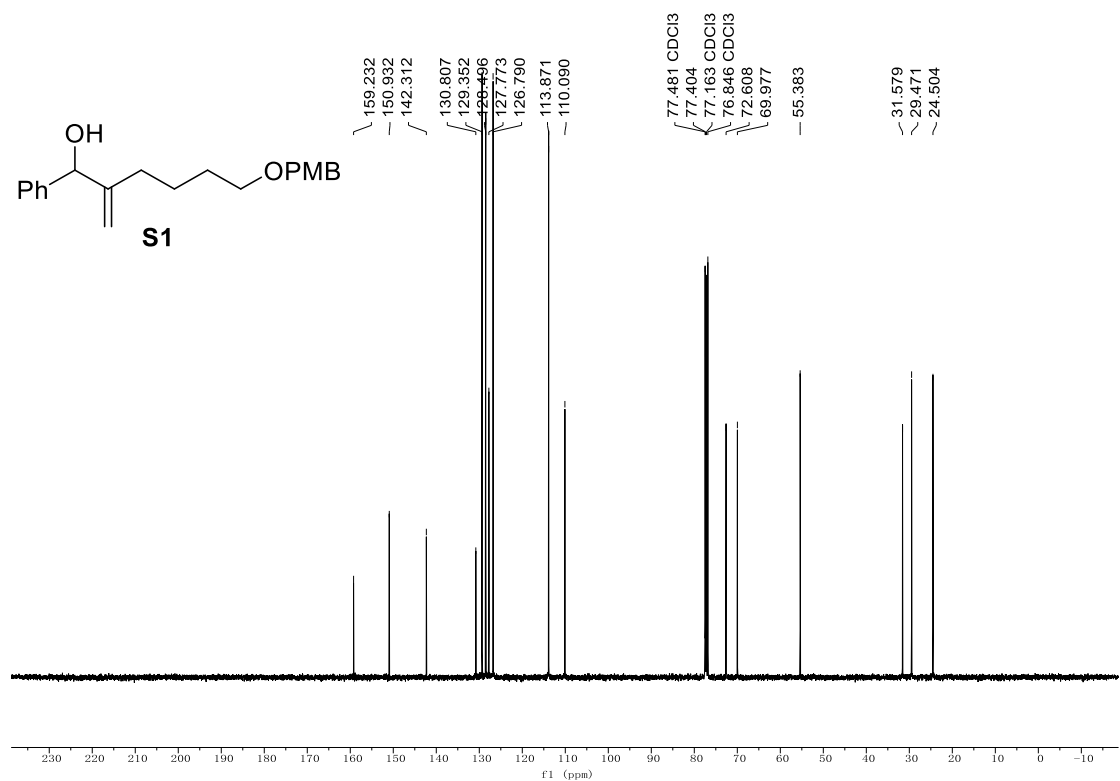

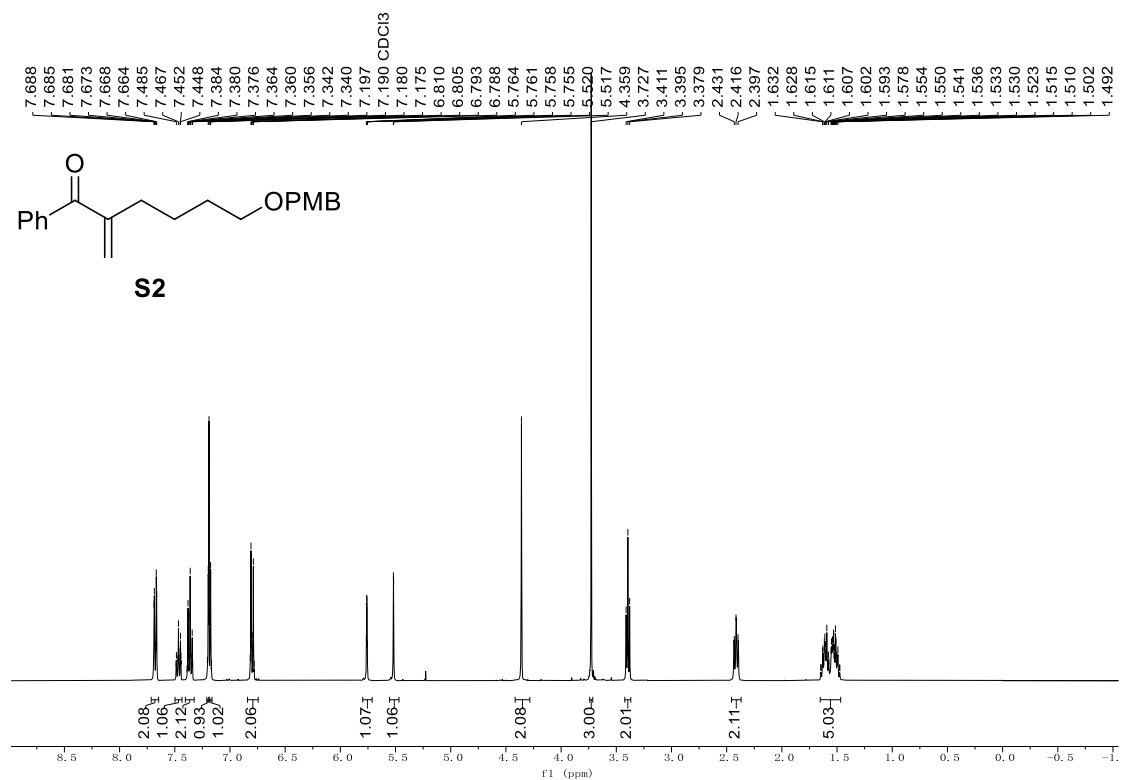

<sup>1</sup>H NMR spectrum (CDCl<sub>3</sub>, 400 MHz) of S2

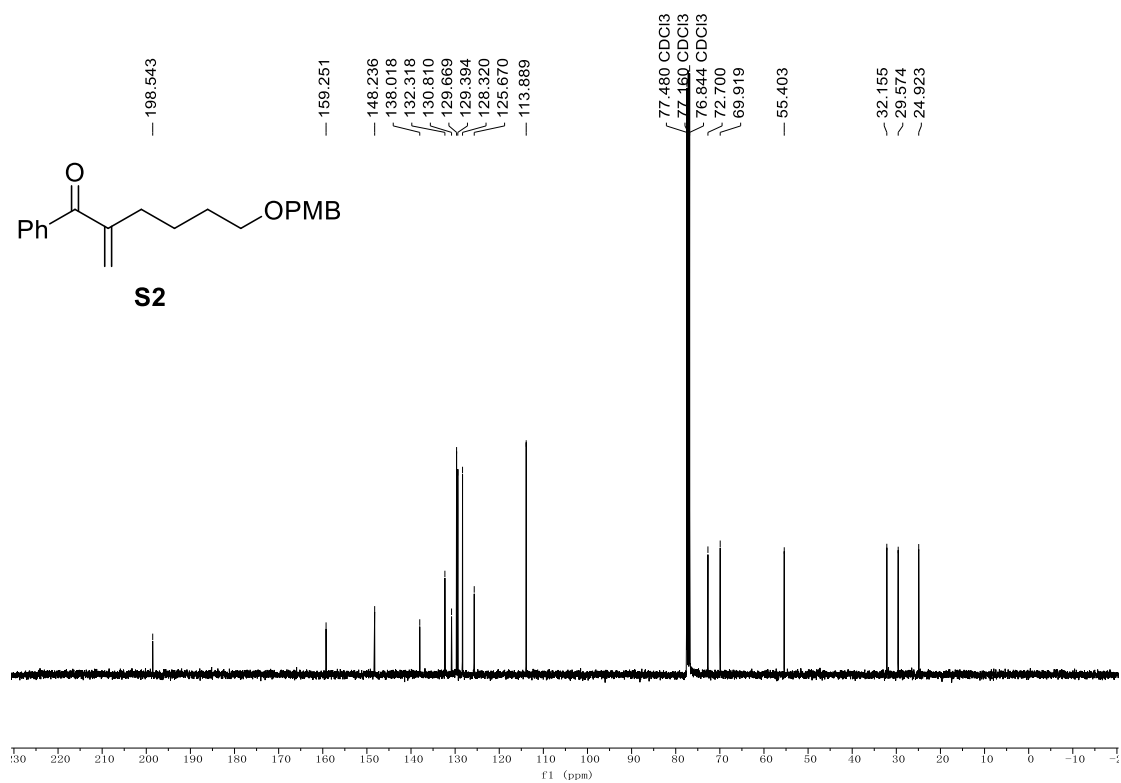

<sup>13</sup>C NMR spectrum (CDCl<sub>3</sub>, 100 MHz) of S2



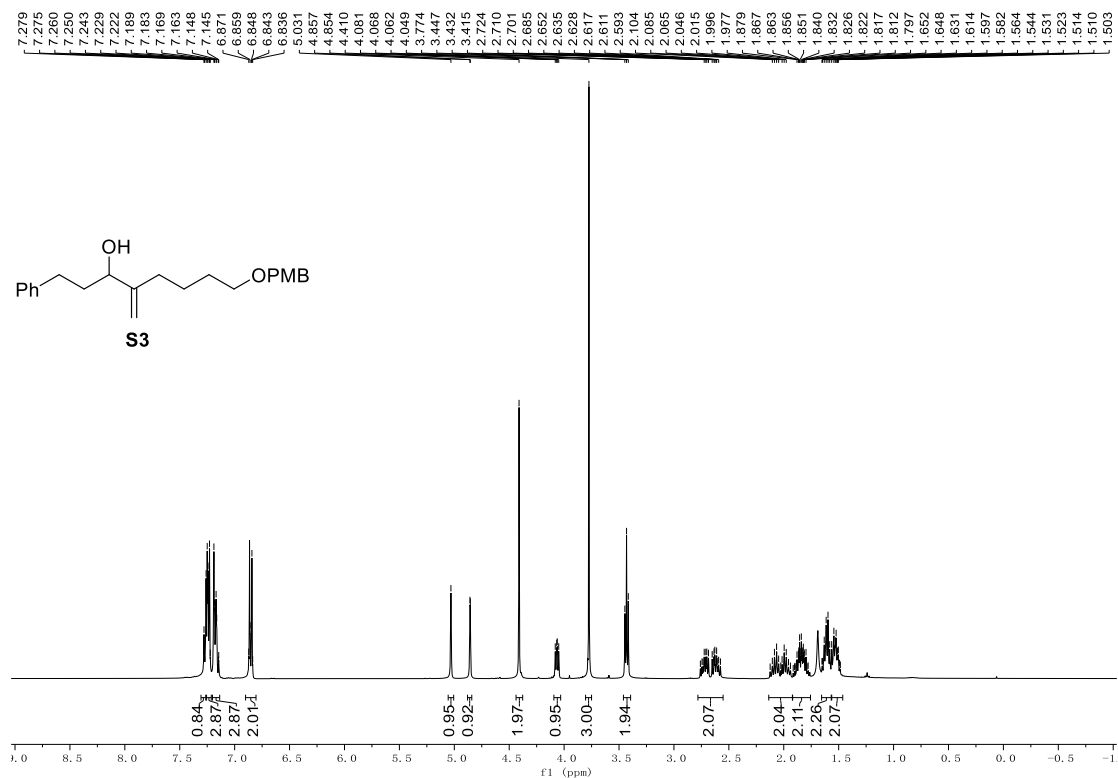

<sup>1</sup>H NMR spectrum (CDCl<sub>3</sub>, 400 MHz) of S3

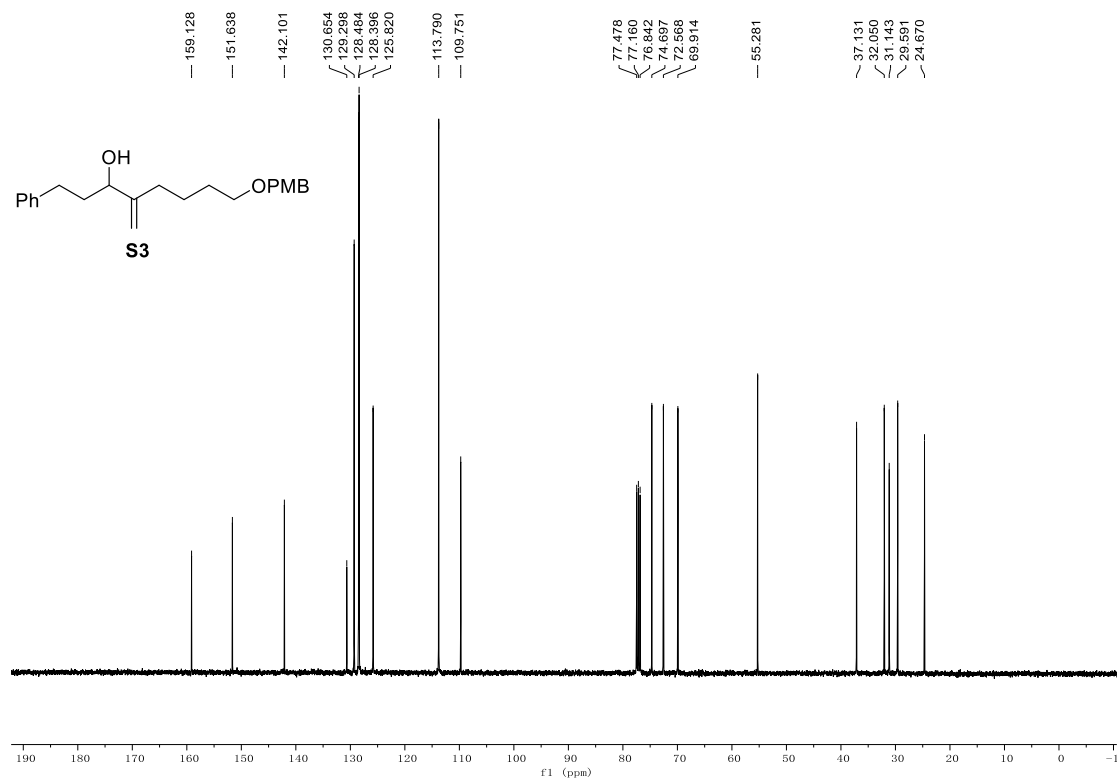

<sup>13</sup>C NMR spectrum (CDCl<sub>3</sub>, 100 MHz) of S3

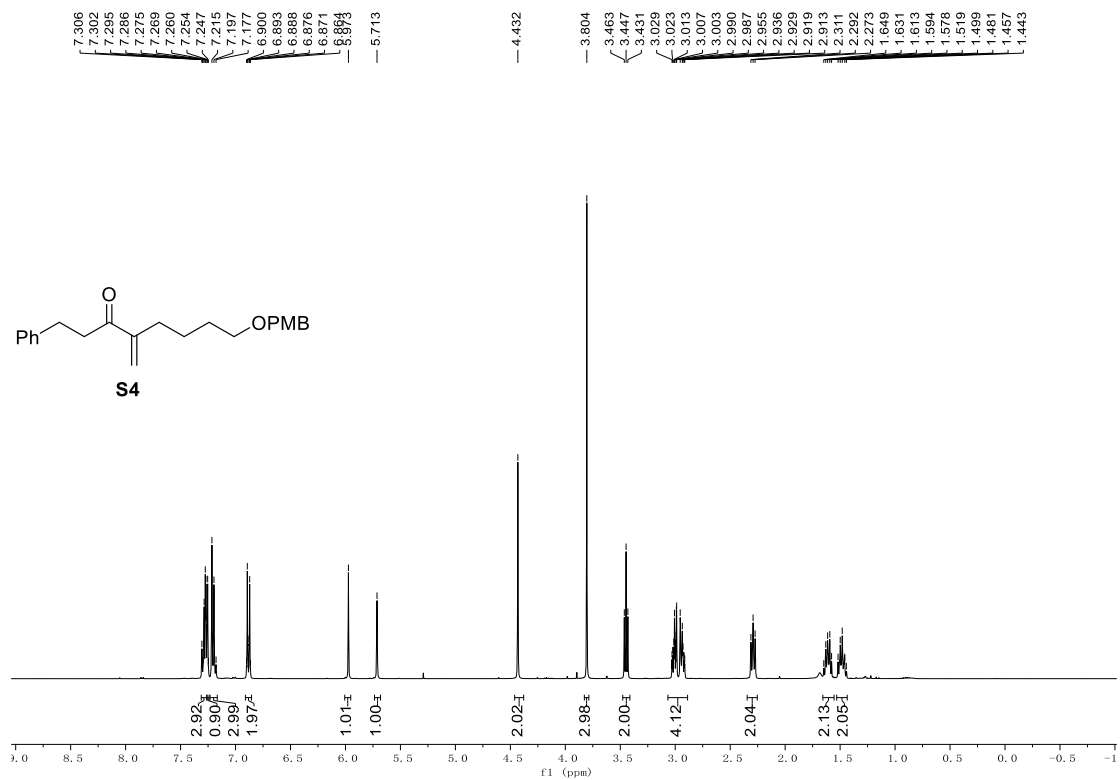

**<sup>1</sup>H NMR spectrum (CDCl<sub>3</sub>, 400 MHz) of S4**

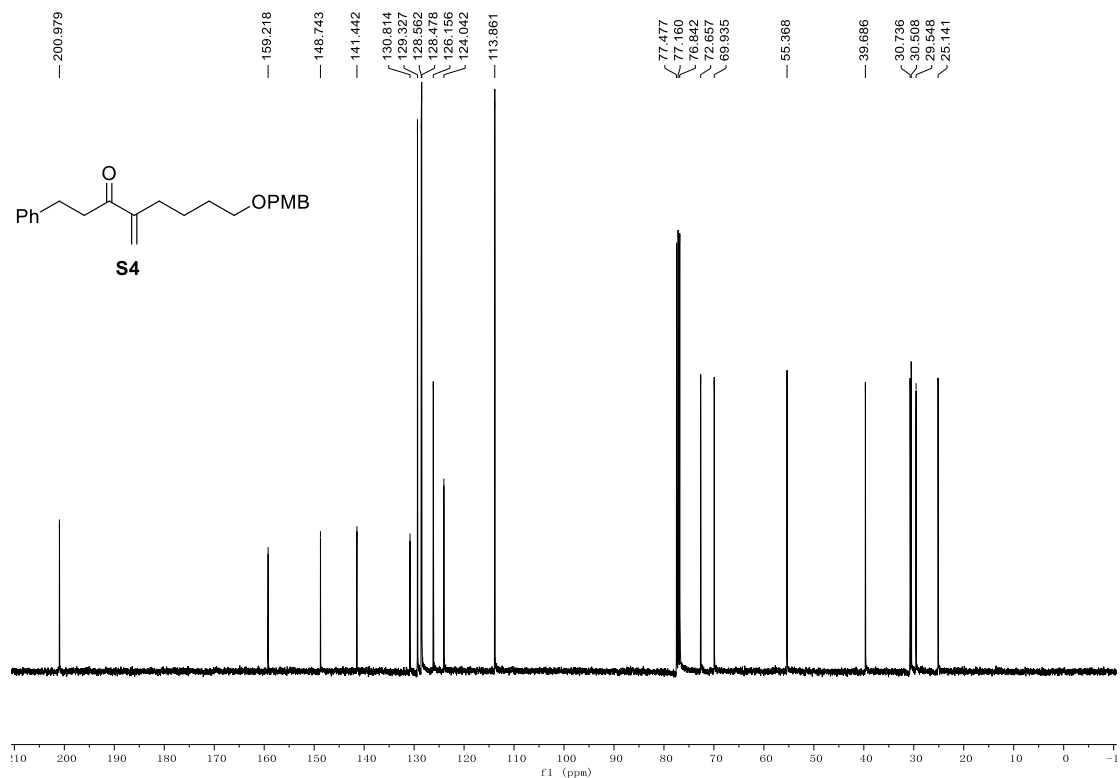

**<sup>13</sup>C NMR spectrum (CDCl<sub>3</sub>, 100 MHz) of S4**

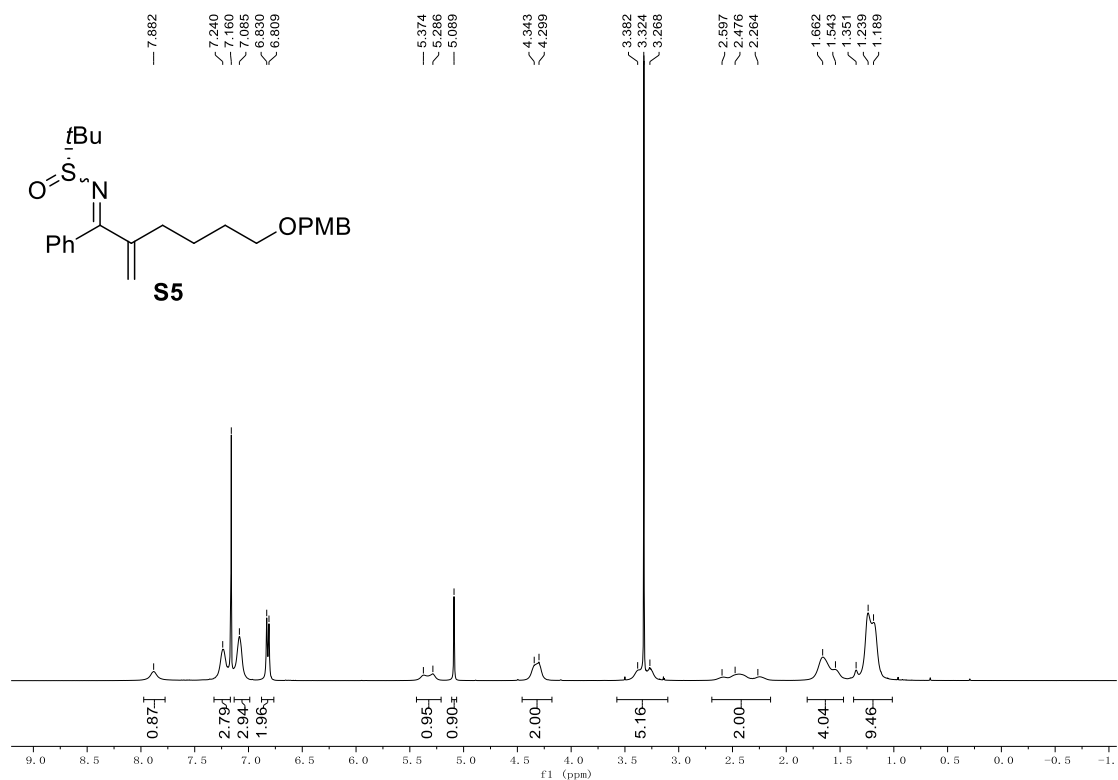

**<sup>1</sup>H NMR spectrum (C<sub>6</sub>D<sub>6</sub>, 400 MHz) of S5 (mixture of imino *Z/E* isomers)**

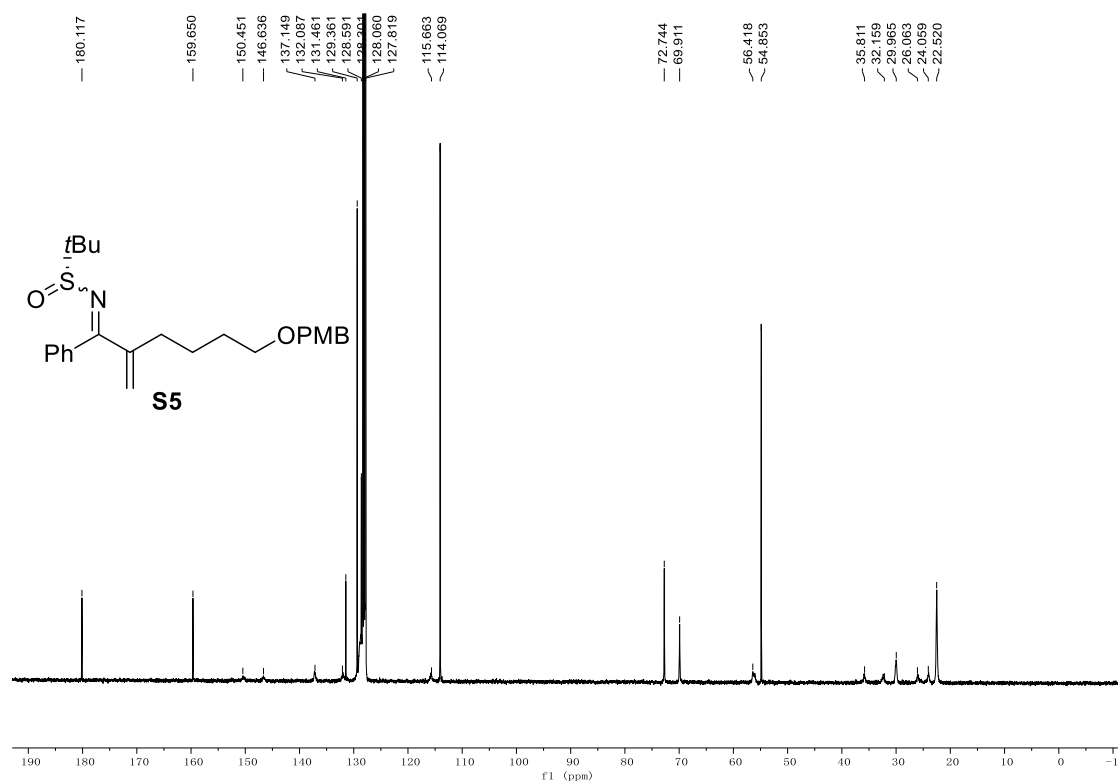

**<sup>13</sup>C NMR spectrum (C<sub>6</sub>D<sub>6</sub>, 100 MHz) of S5 (mixture of imino *Z/E* isomers)**

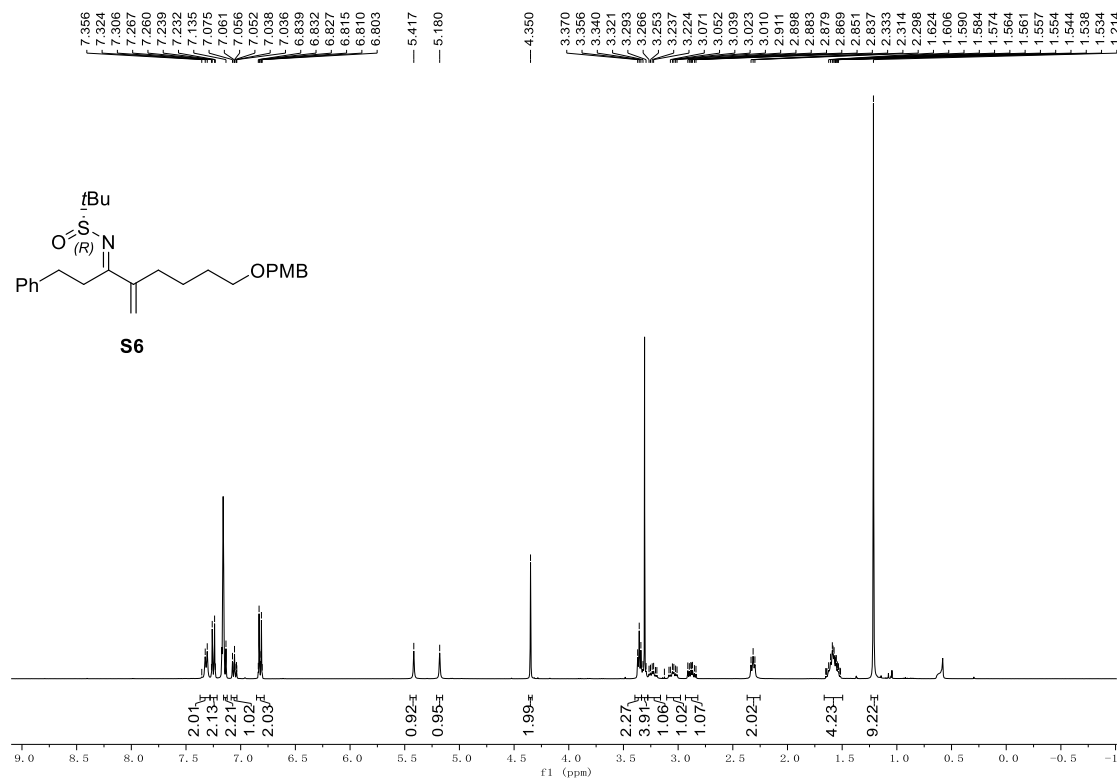

<sup>1</sup>H NMR spectrum (CDCl<sub>3</sub>, 400 MHz) of S6

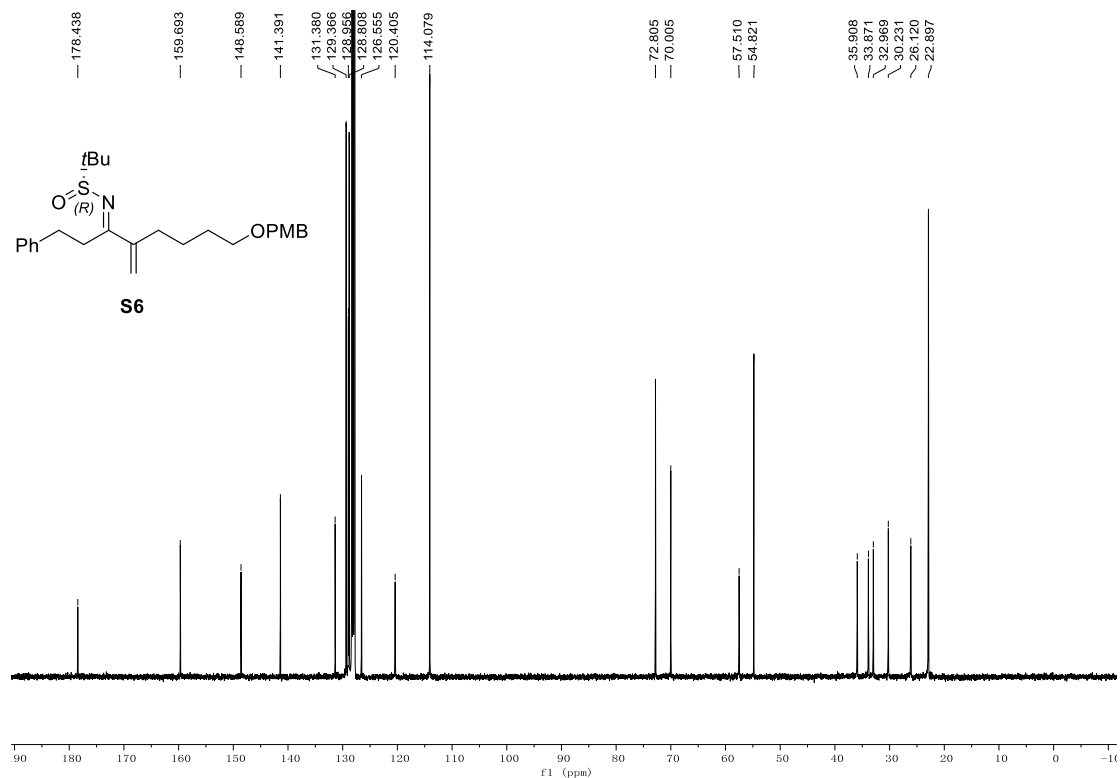

<sup>13</sup>C NMR spectrum (CDCl<sub>3</sub>, 100 MHz) of S6

**<sup>1</sup>H and <sup>13</sup>C NMR spectra for enesulfonamides (*Ss, E*)-1a, (*Rs, E*)-1n, 1x, 1y**

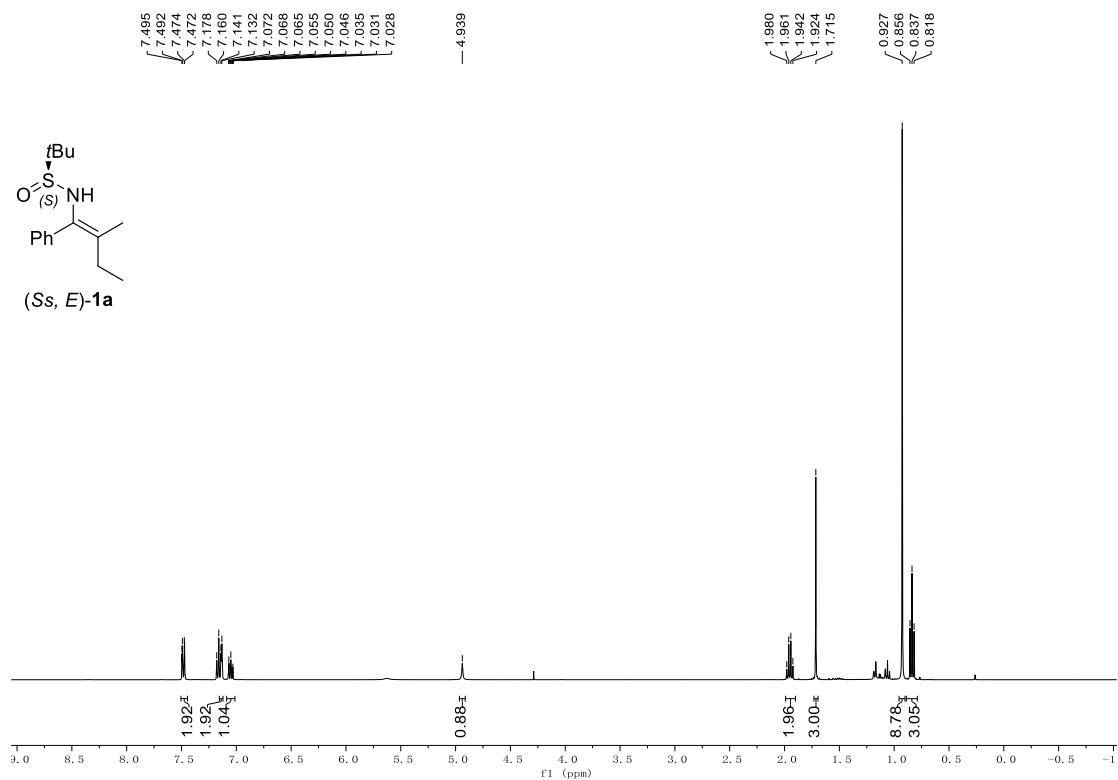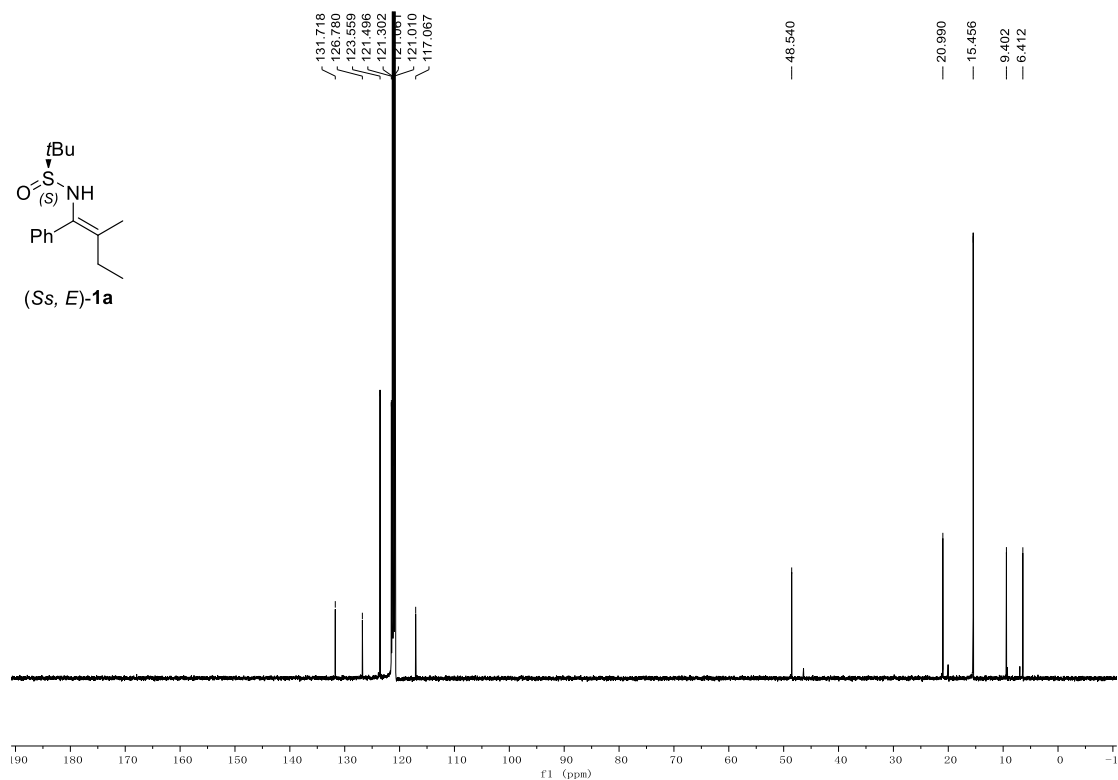

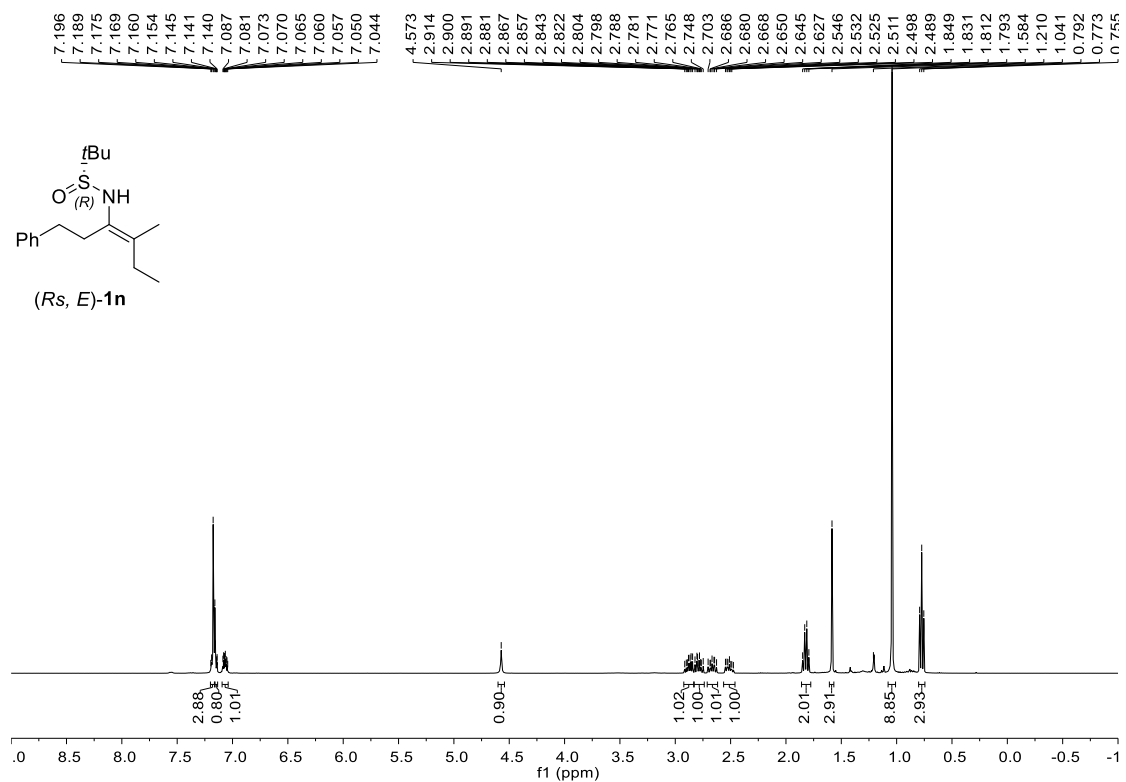

**<sup>1</sup>H NMR spectrum (C<sub>6</sub>D<sub>6</sub>, 400 MHz) of (*R<sub>s</sub>*, *E*)-**1n****

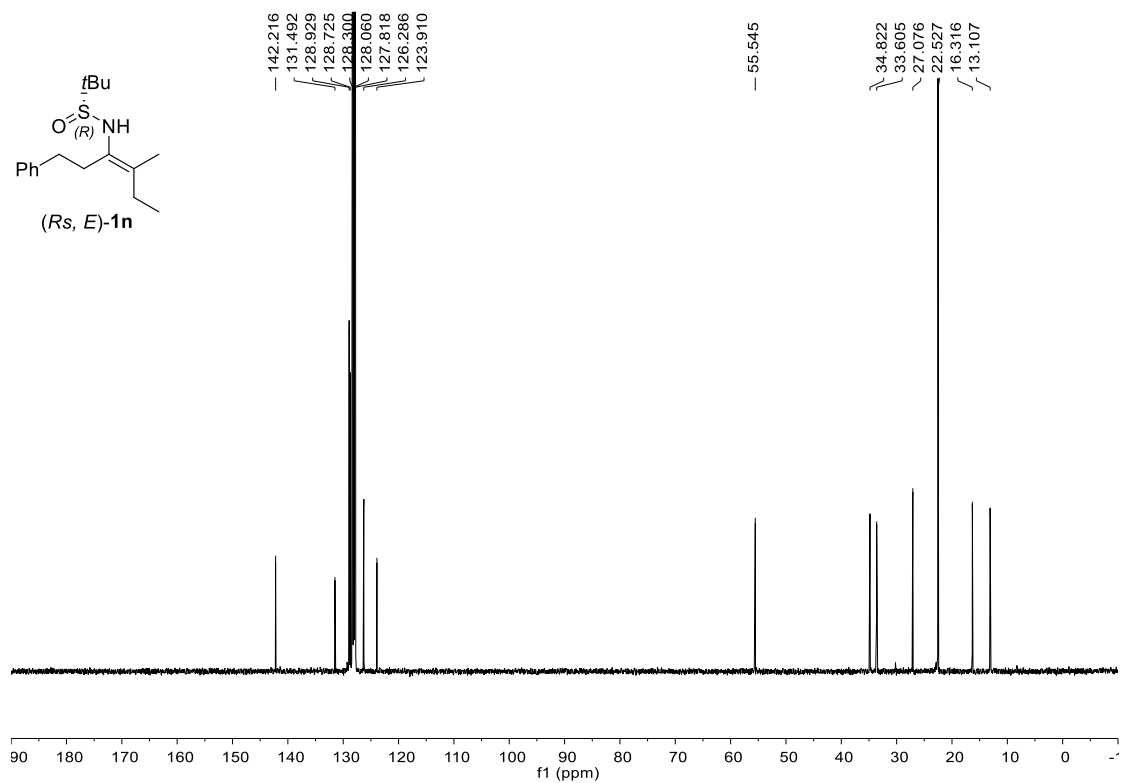

**<sup>13</sup>C NMR spectrum (C<sub>6</sub>D<sub>6</sub>, 100 MHz) of (*R<sub>s</sub>*, *E*)-**1n****

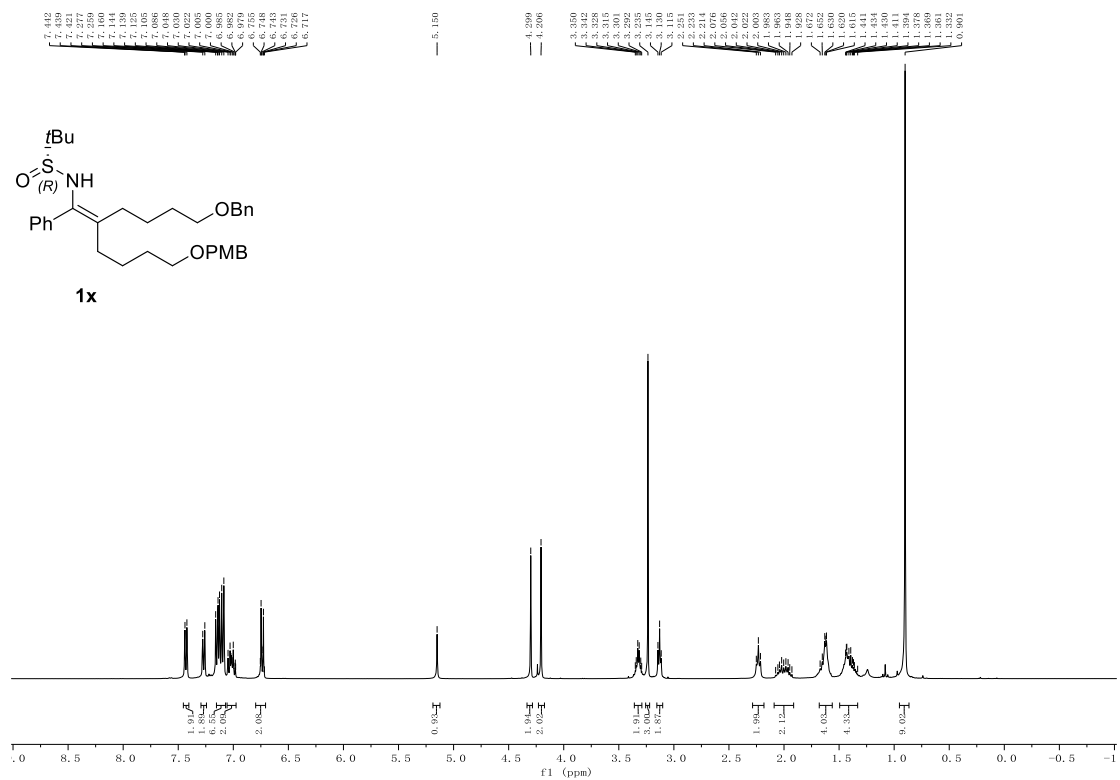

<sup>1</sup>H NMR spectrum (C<sub>6</sub>D<sub>6</sub>, 400 MHz) of **1x**

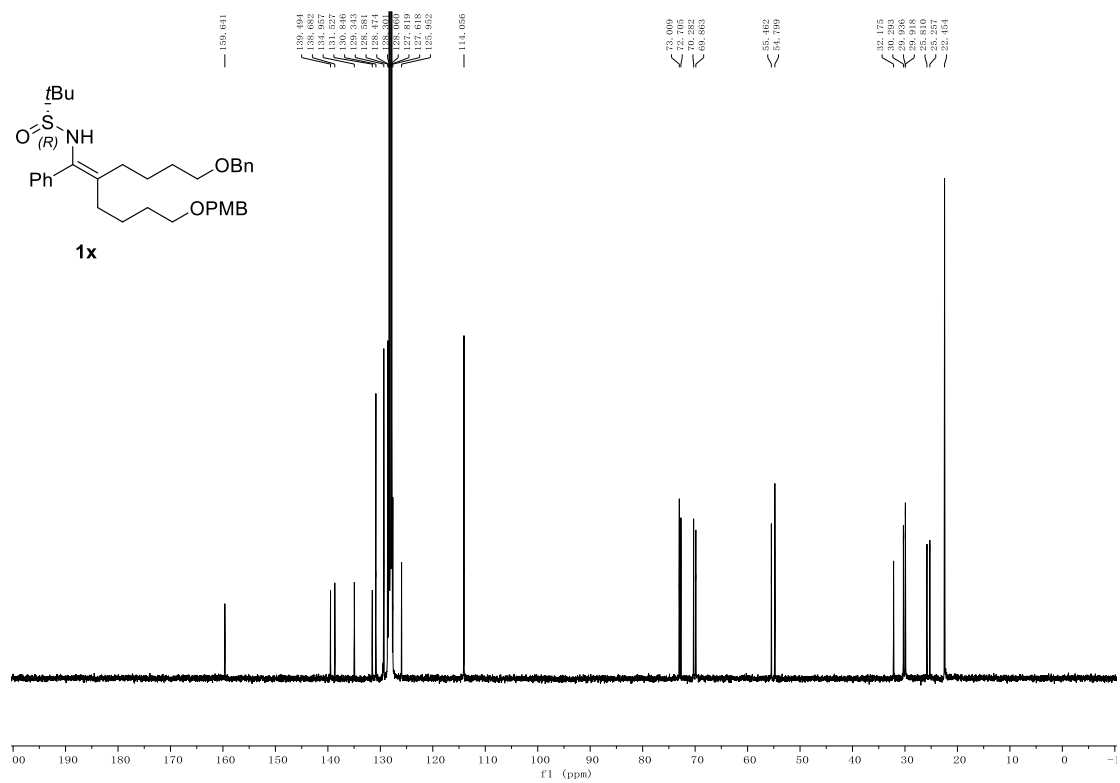

<sup>13</sup>C NMR spectrum (C<sub>6</sub>D<sub>6</sub>, 100 MHz) of **1x**

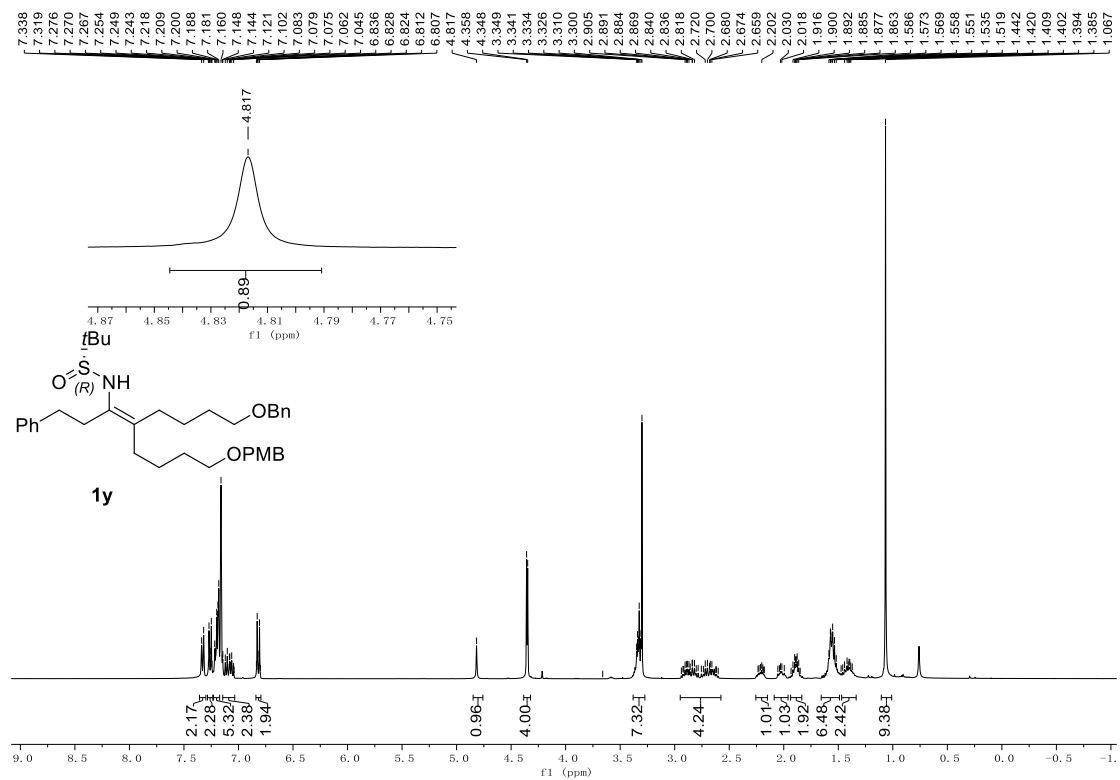

**<sup>1</sup>H NMR spectrum (C<sub>6</sub>D<sub>6</sub>, 400 MHz) of **1y****

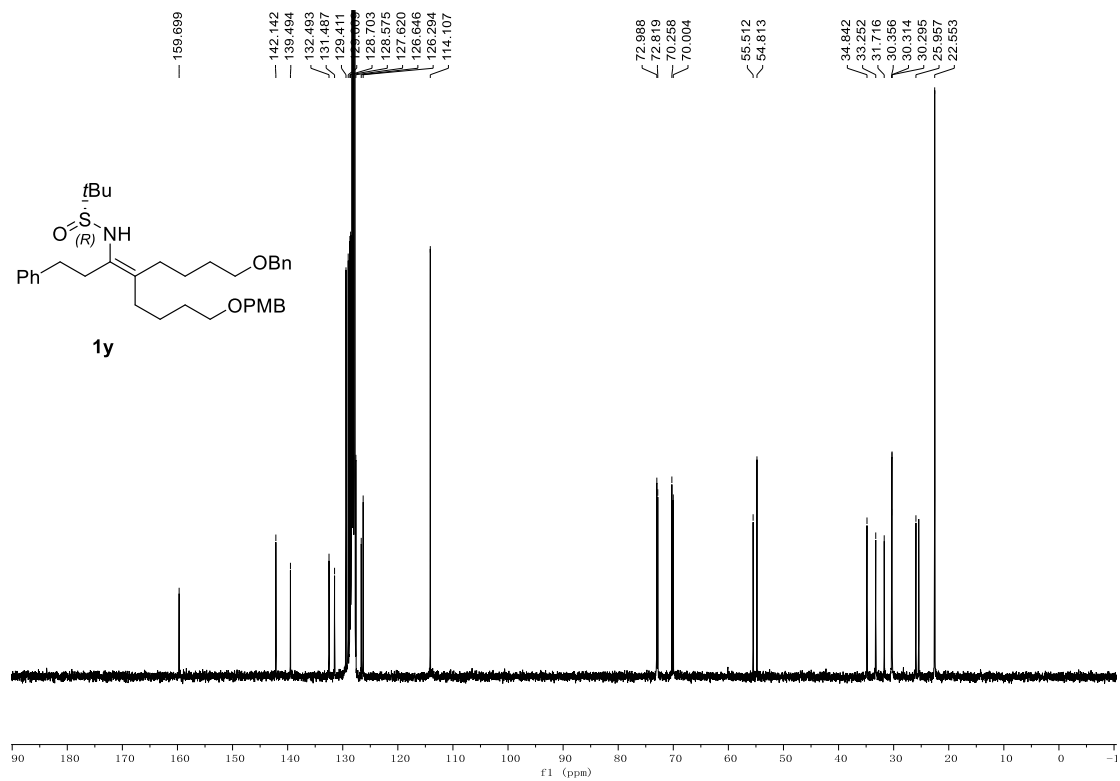

**<sup>13</sup>C NMR spectrum (C<sub>6</sub>D<sub>6</sub>, 100 MHz) of **1y****



# <sup>1</sup>H and <sup>13</sup>C NMR spectra for compounds 1aa–1ab, 2g–2h

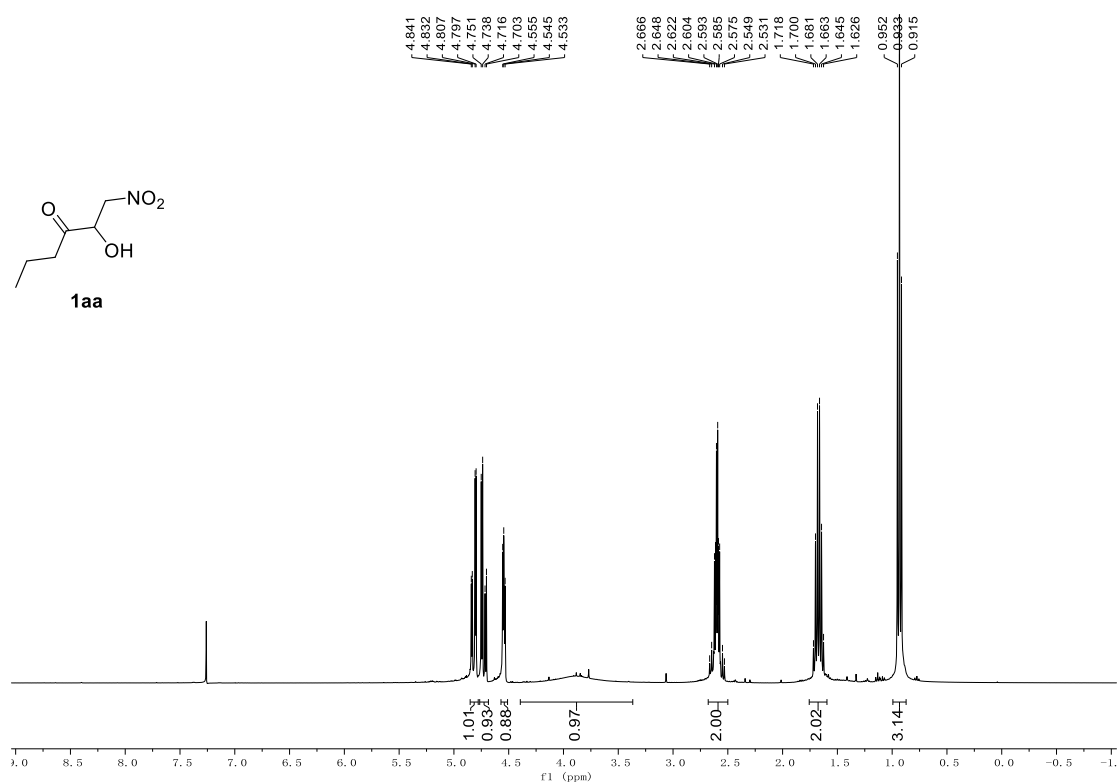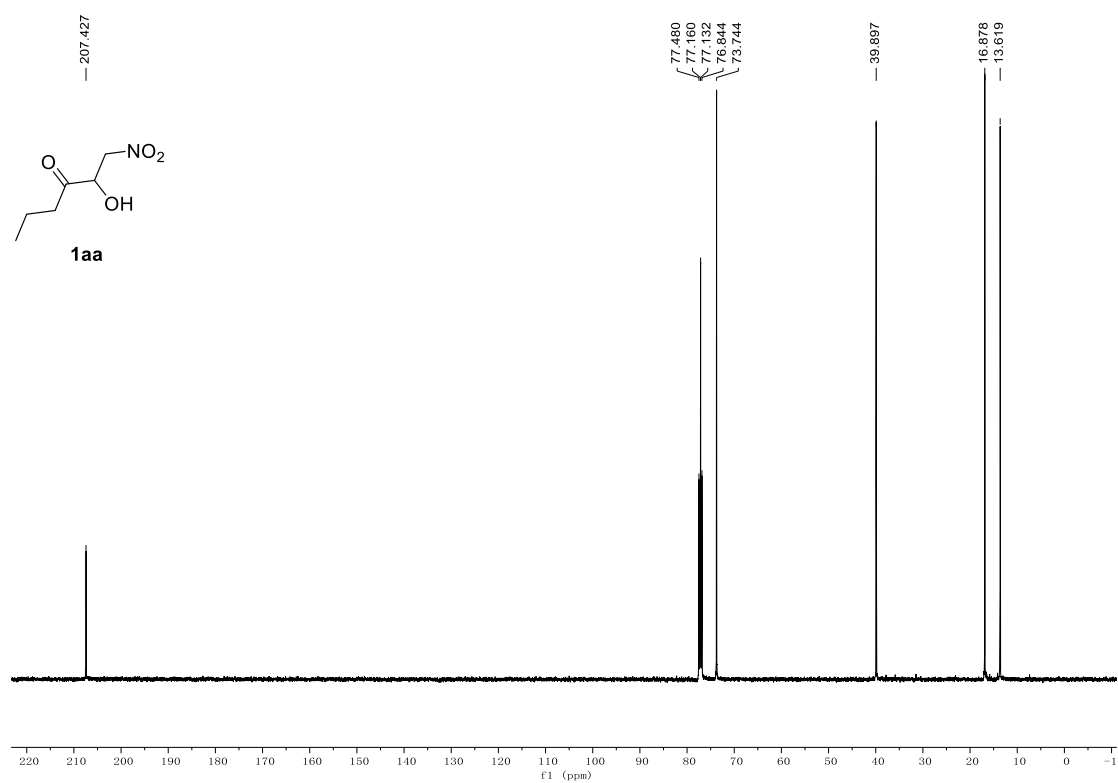

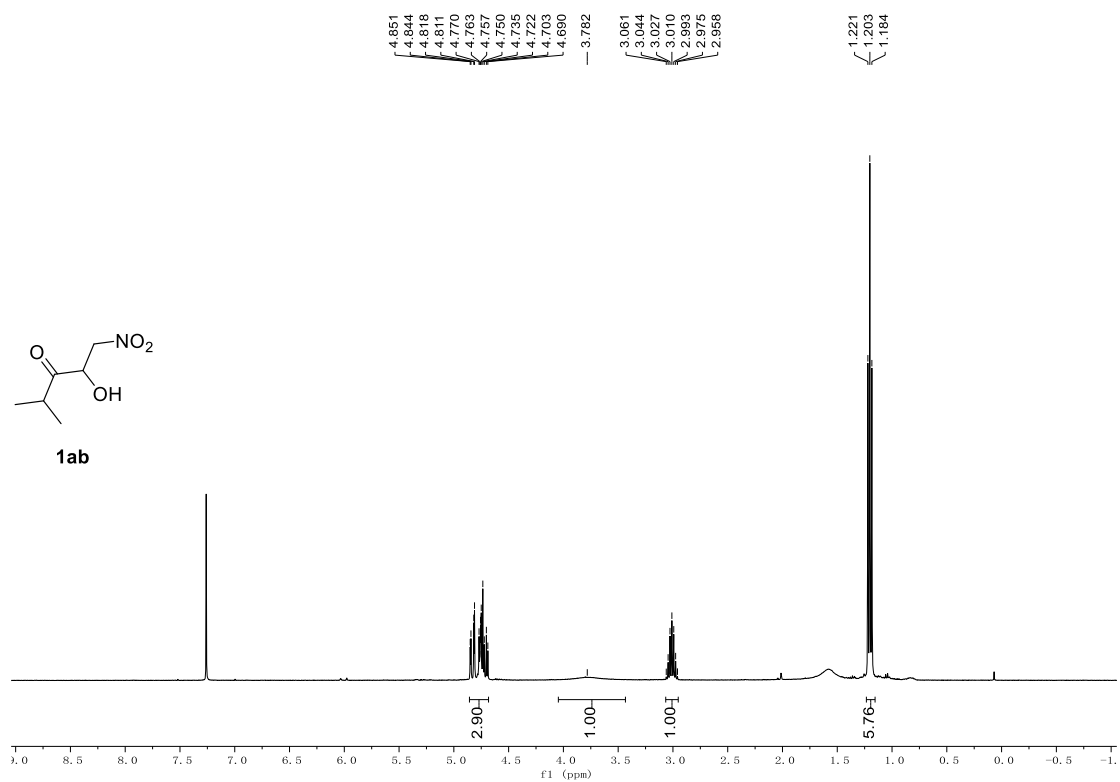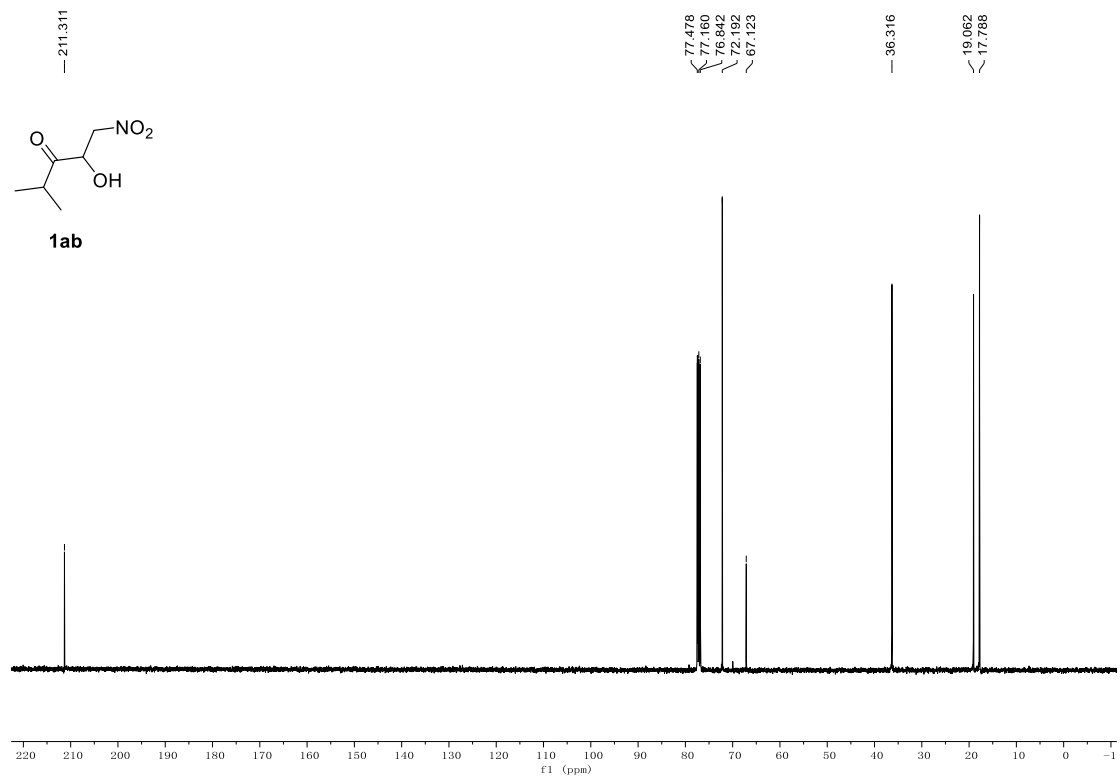

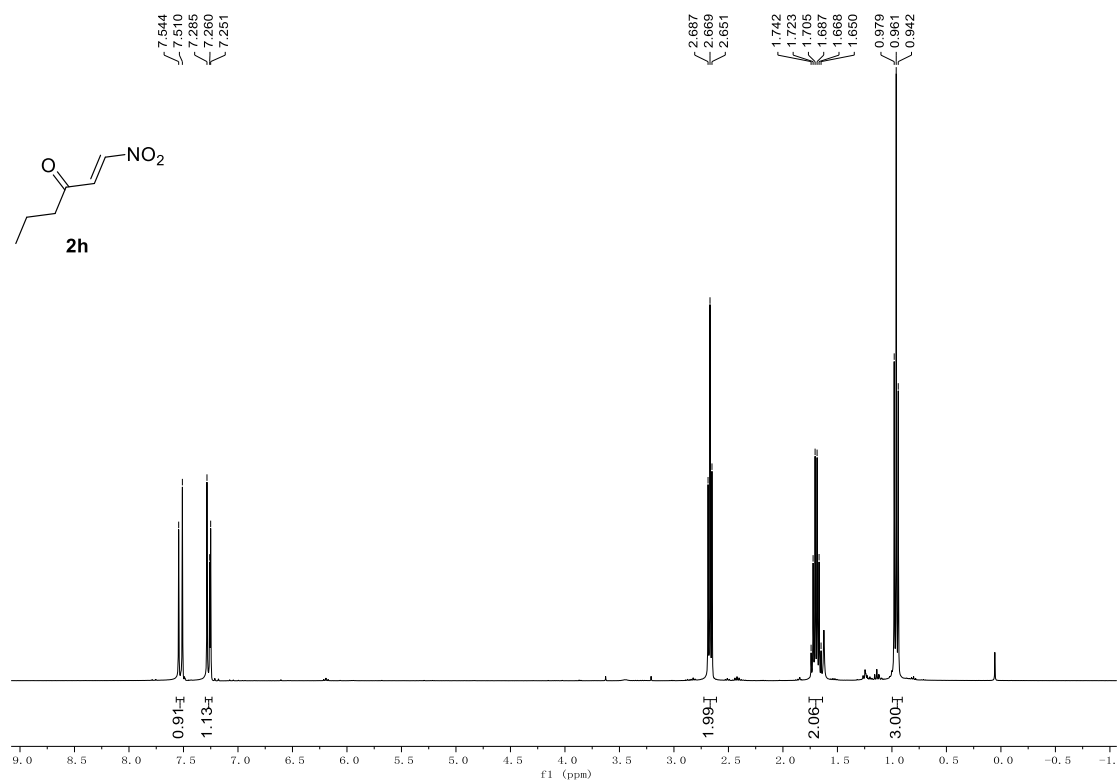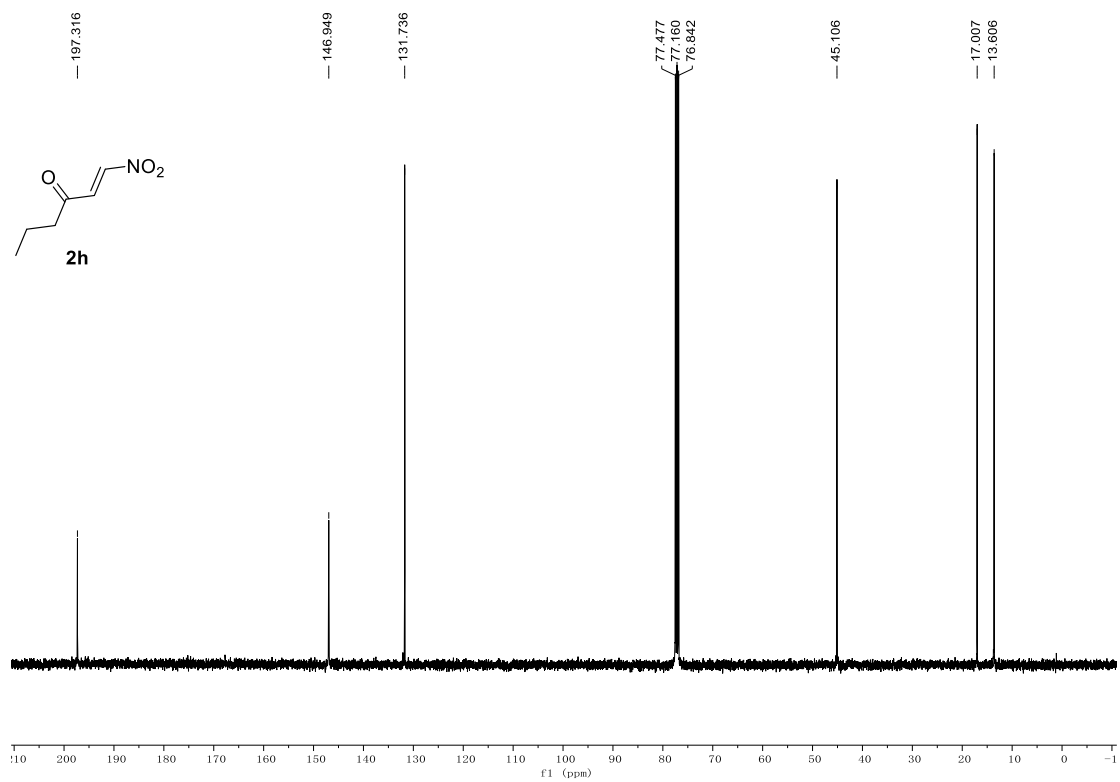

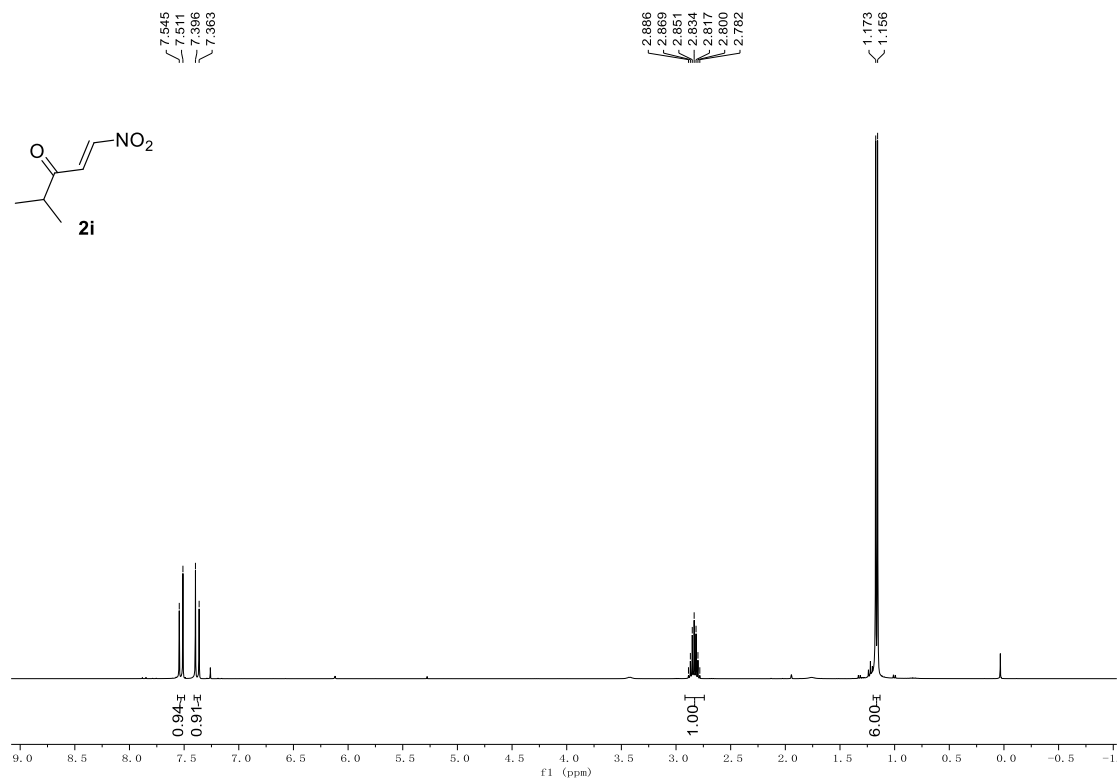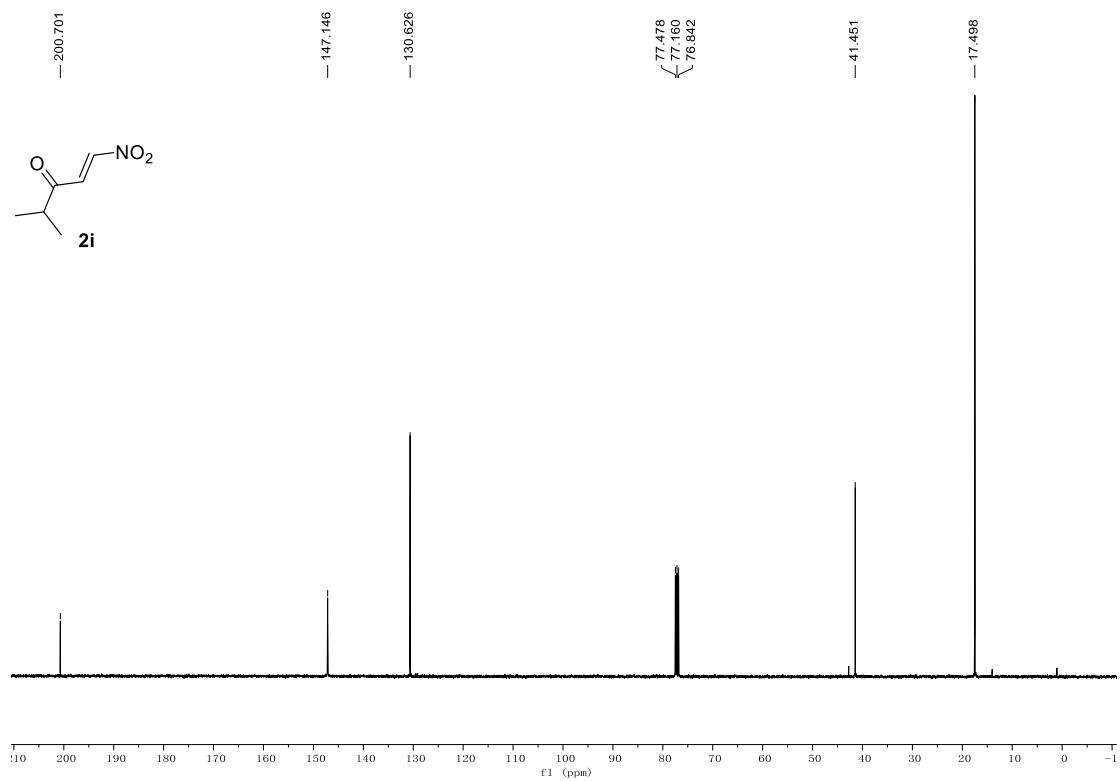

# <sup>1</sup>H and <sup>13</sup>C NMR spectra for β-sulfonyl acrylonitrile 4b

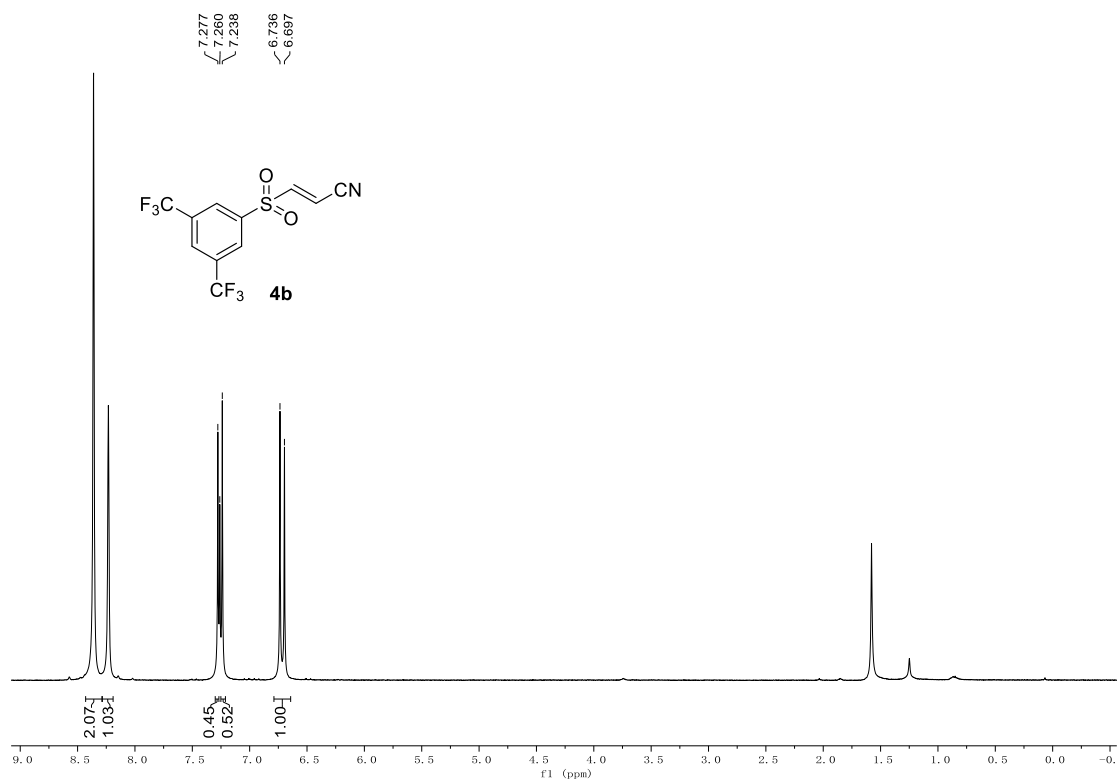

<sup>1</sup>H NMR spectrum (CDCl<sub>3</sub>, 400 MHz) of **4b**

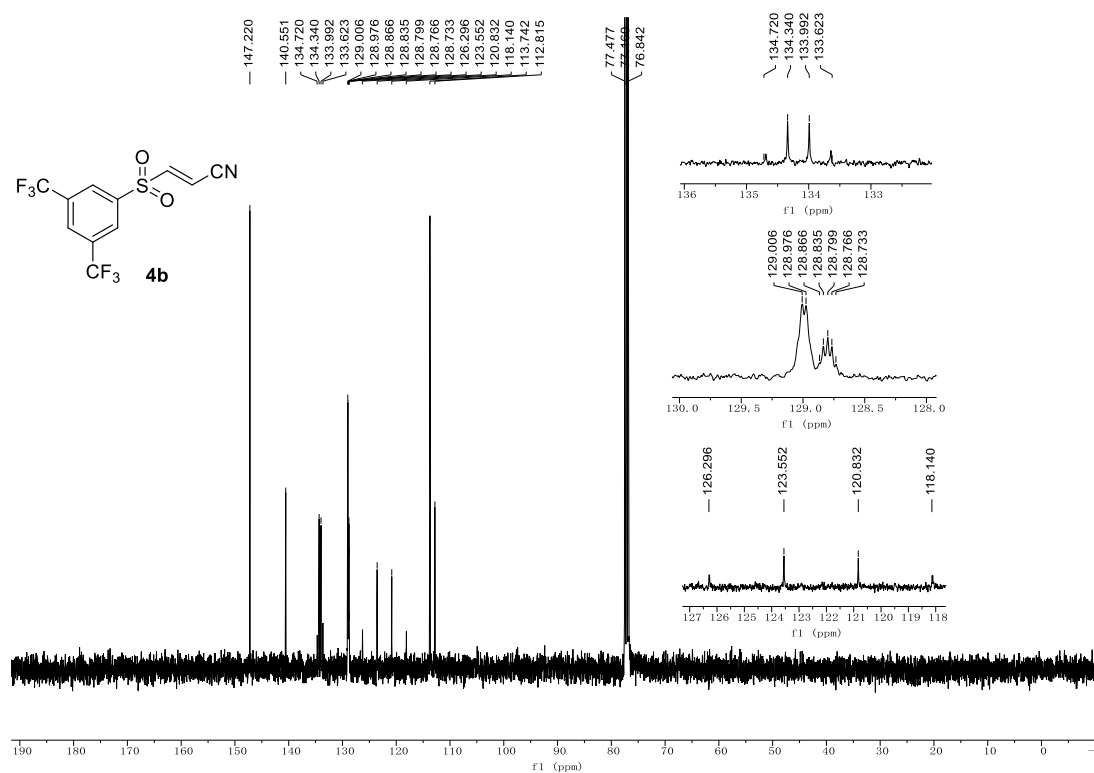

<sup>13</sup>C NMR spectrum (CDCl<sub>3</sub>, 100 MHz) of **4b**

# <sup>1</sup>H and <sup>13</sup>C NMR spectra of 1,5- and 1,4-dicarbonyl derivatives

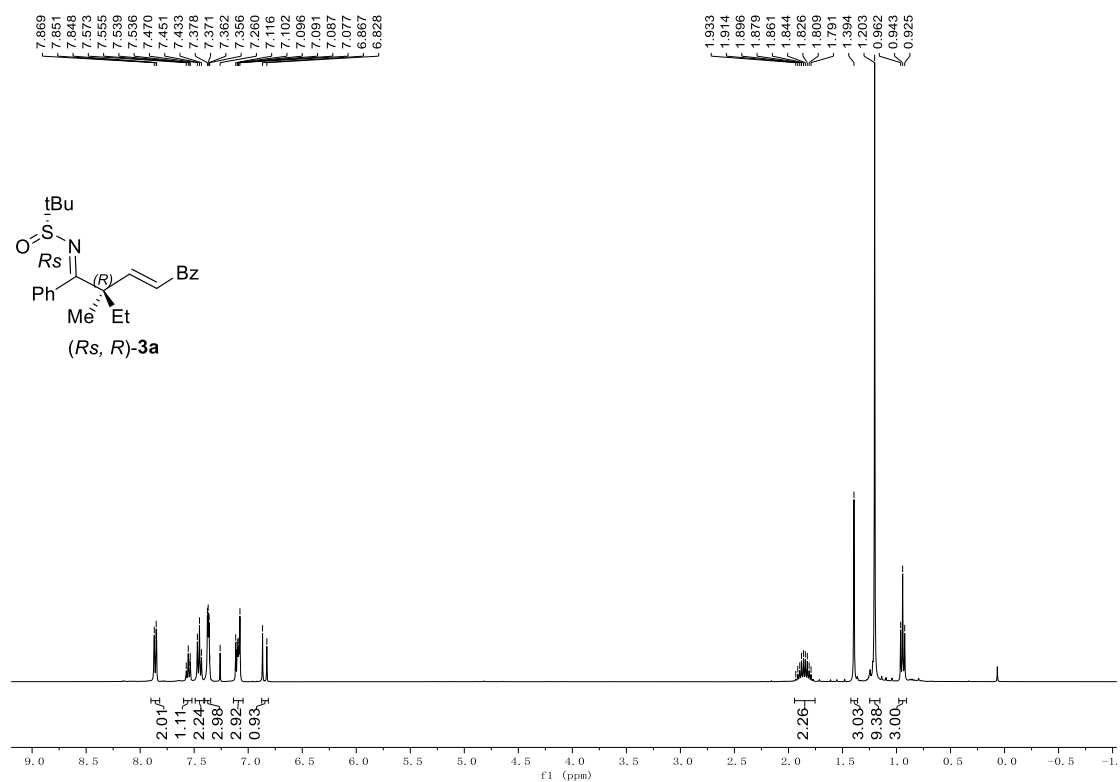

<sup>1</sup>H NMR spectrum (CDCl<sub>3</sub>, 400 MHz) of *(R<sub>s</sub>, R)*-3a

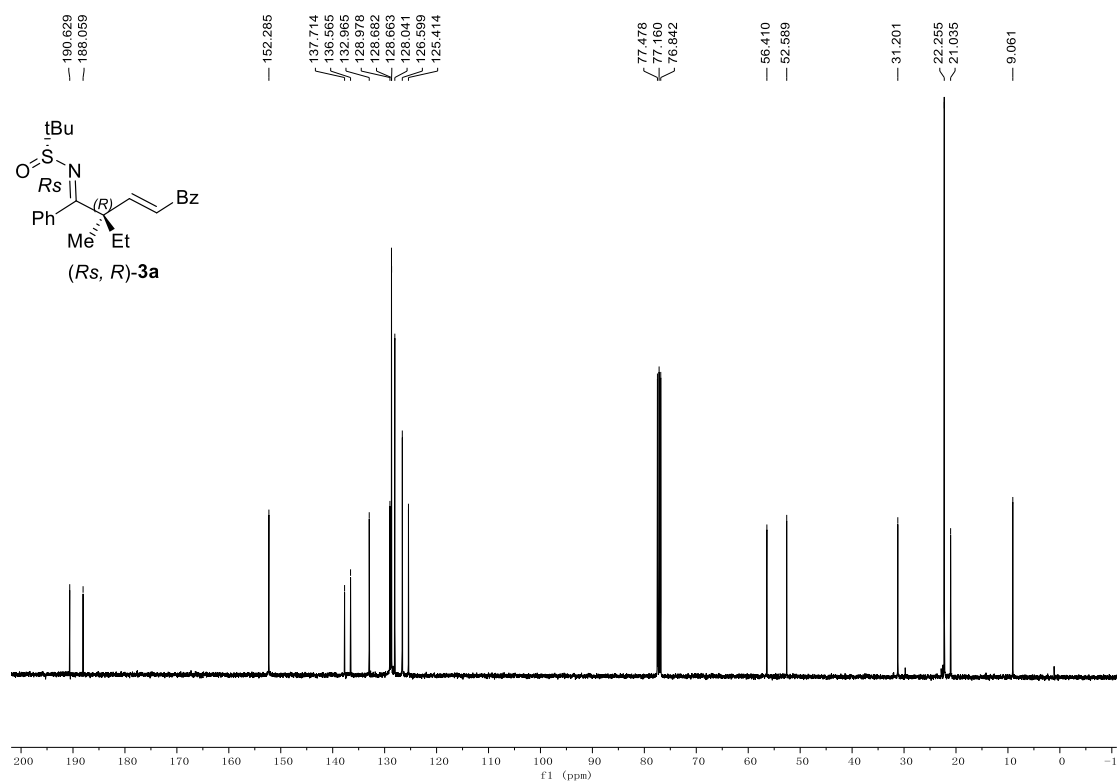

<sup>13</sup>C NMR spectrum (CDCl<sub>3</sub>, 100 MHz) of *(R<sub>s</sub>, R)*-3a

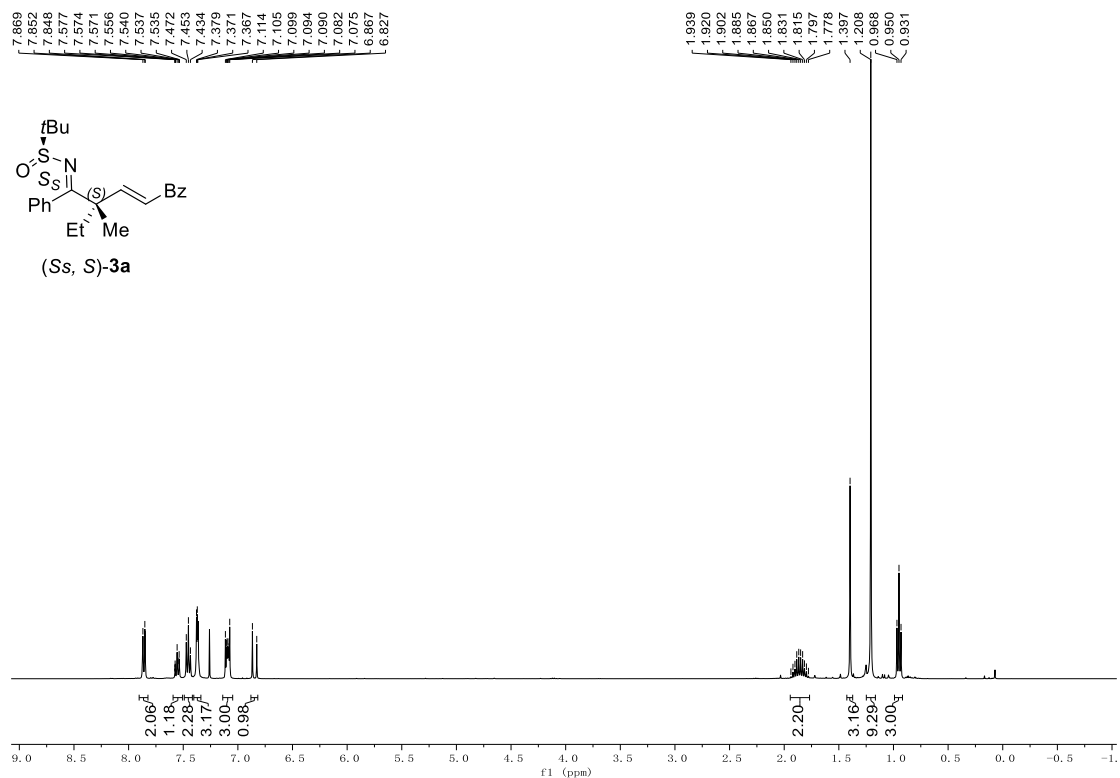

<sup>1</sup>H NMR spectrum (CDCl<sub>3</sub>, 400 MHz) of **(Ss, S)-3a**

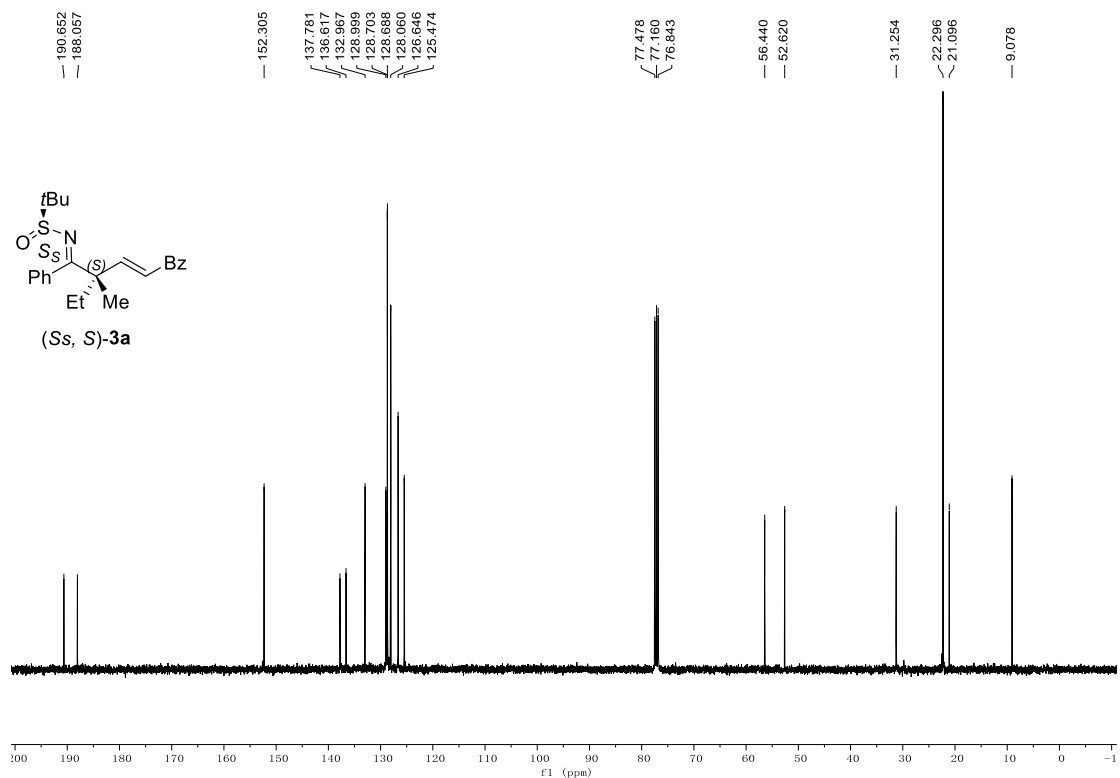

<sup>13</sup>C NMR spectrum (CDCl<sub>3</sub>, 100 MHz) of **(Ss, S)-3a**

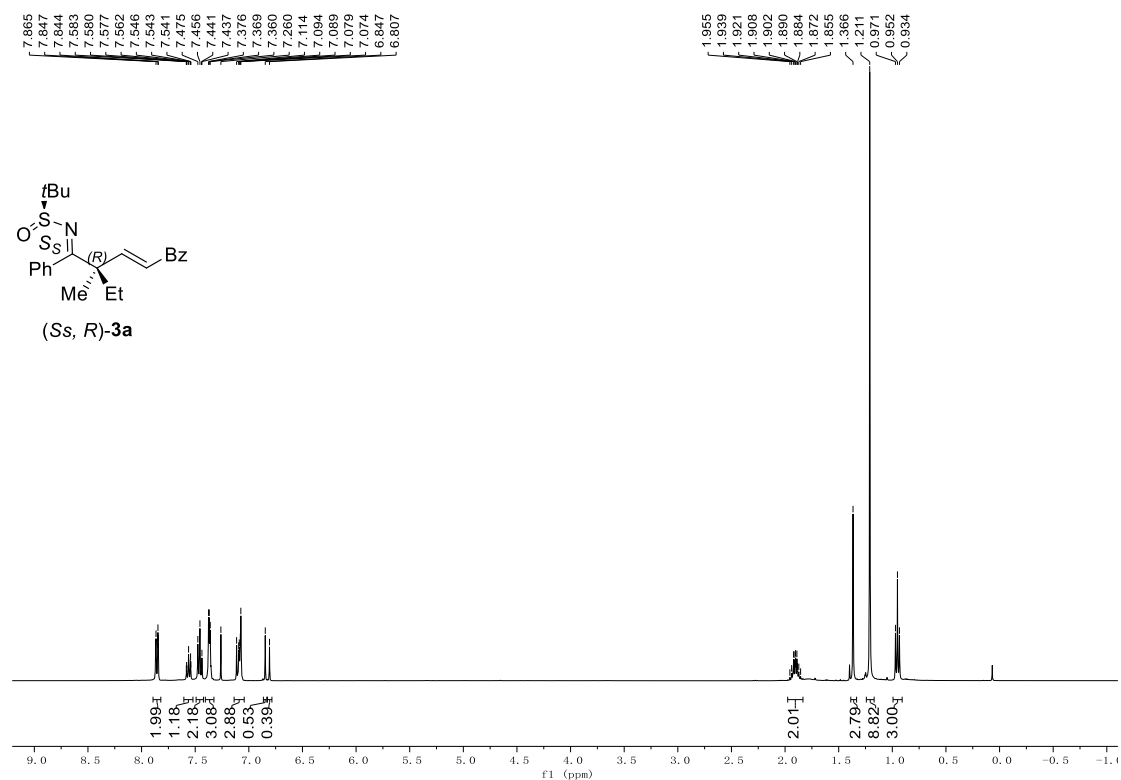

<sup>1</sup>H NMR spectrum (CDCl<sub>3</sub>, 400 MHz) of **(Ss, R)-3a**

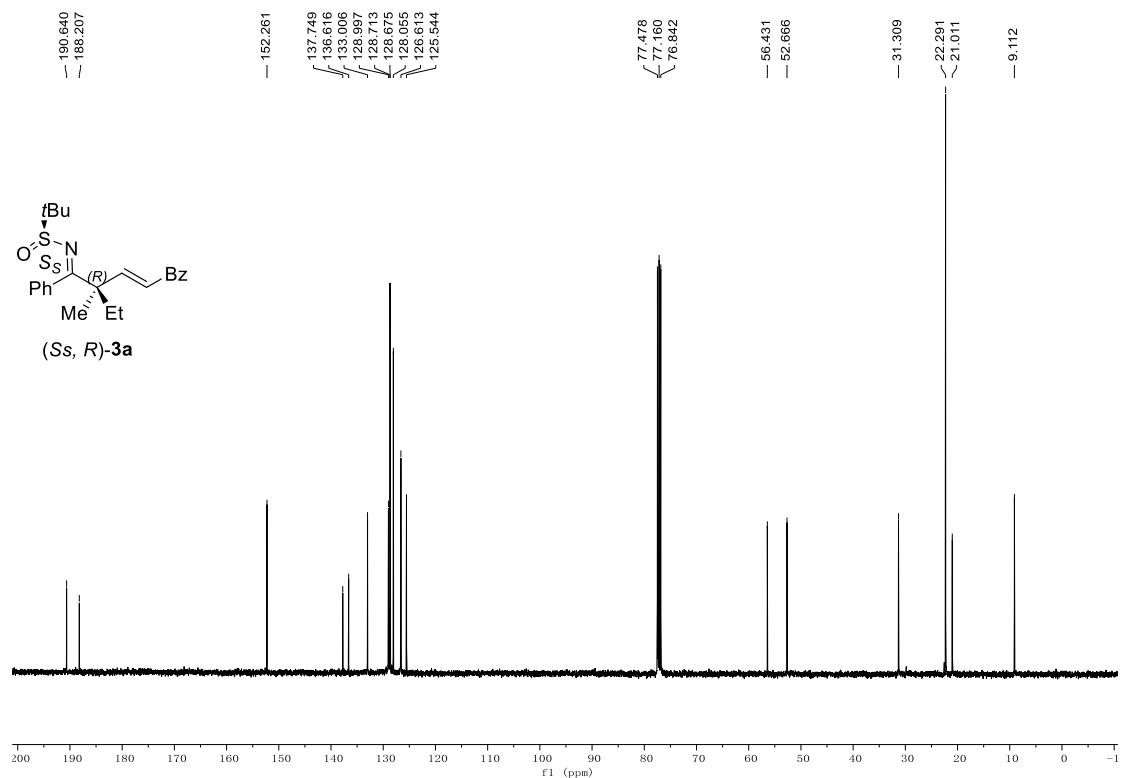

<sup>13</sup>C NMR spectrum (CDCl<sub>3</sub>, 100 MHz) of **(Ss, R)-3a**



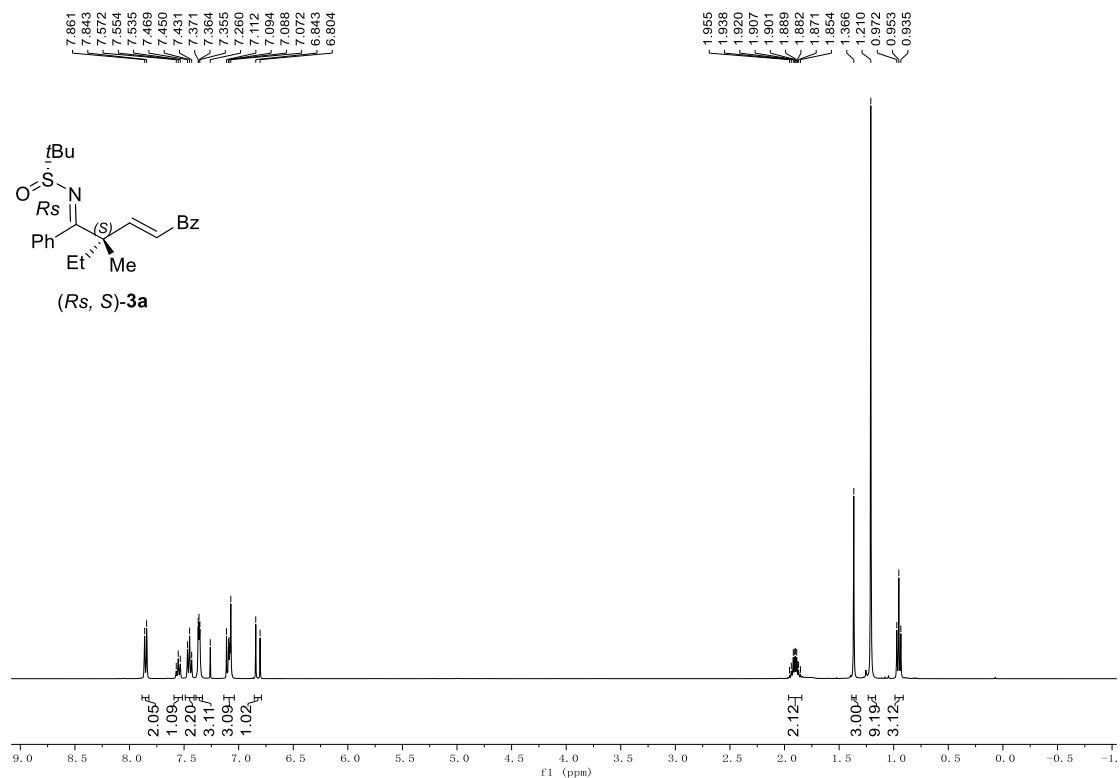

**<sup>1</sup>H NMR spectrum (CDCl<sub>3</sub>, 400 MHz) of (*R<sub>s</sub>*, *S*)-**3a****

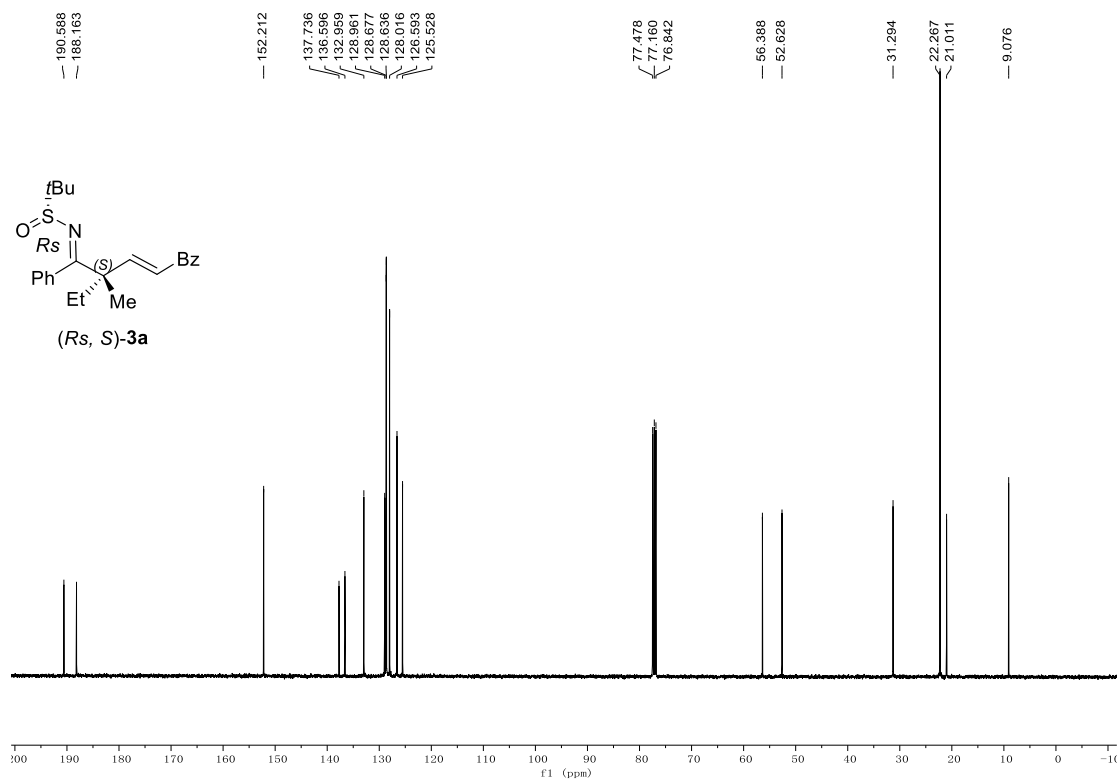

**<sup>13</sup>C NMR spectrum (CDCl<sub>3</sub>, 100 MHz) of (*R<sub>s</sub>*, *S*)-**3a****

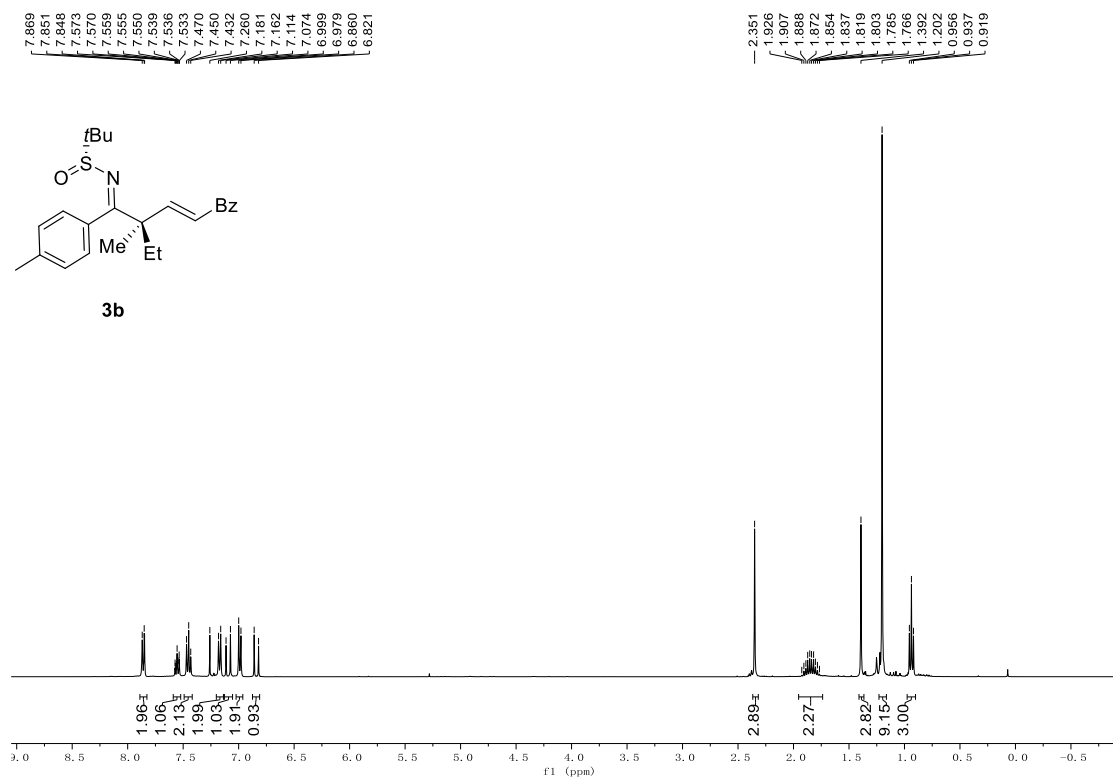

<sup>1</sup>H NMR spectrum (CDCl<sub>3</sub>, 400 MHz) of **3b**

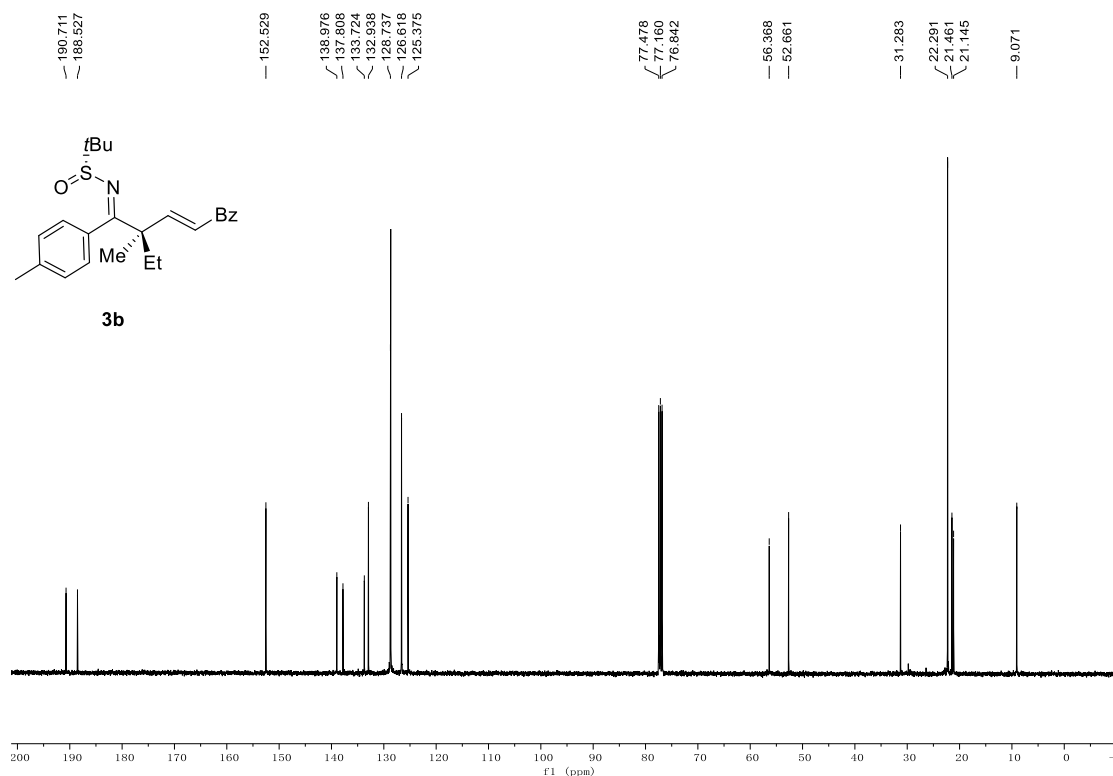

<sup>13</sup>C NMR spectrum (CDCl<sub>3</sub>, 100 MHz) of **3b**

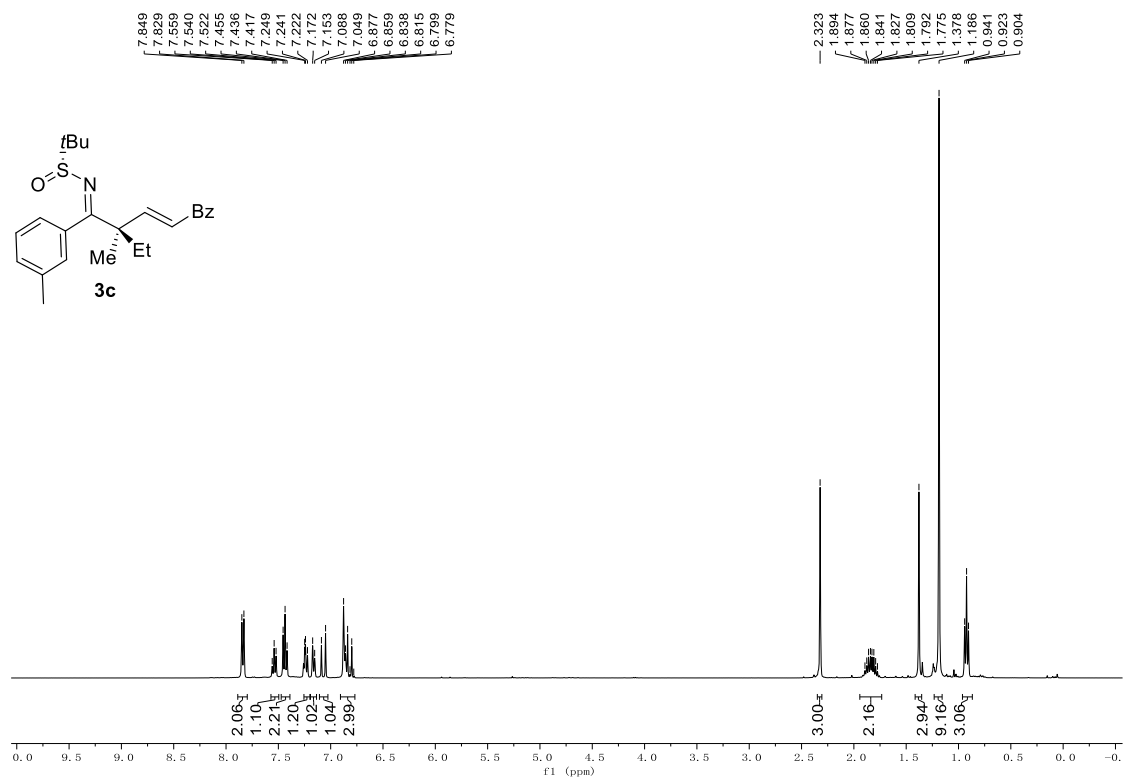

**<sup>1</sup>H NMR spectrum (CDCl<sub>3</sub>, 400 MHz) of **3c****

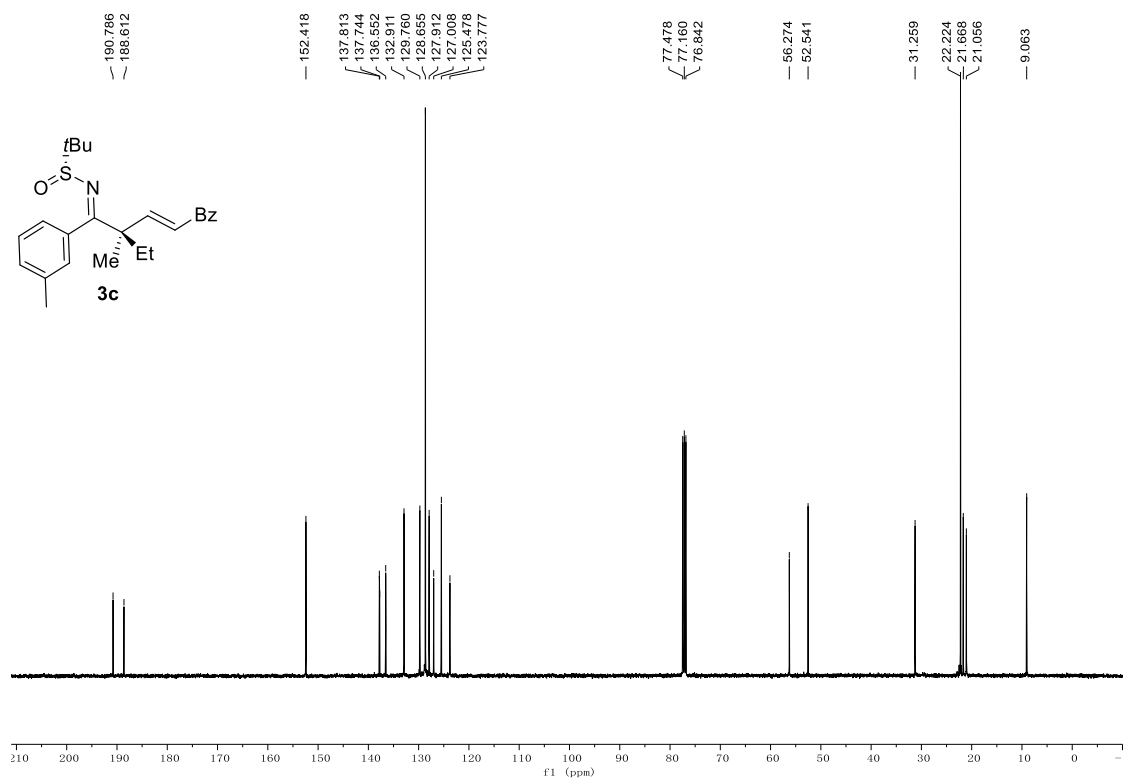

**<sup>13</sup>C NMR spectrum (CDCl<sub>3</sub>, 100 MHz) of **3c****

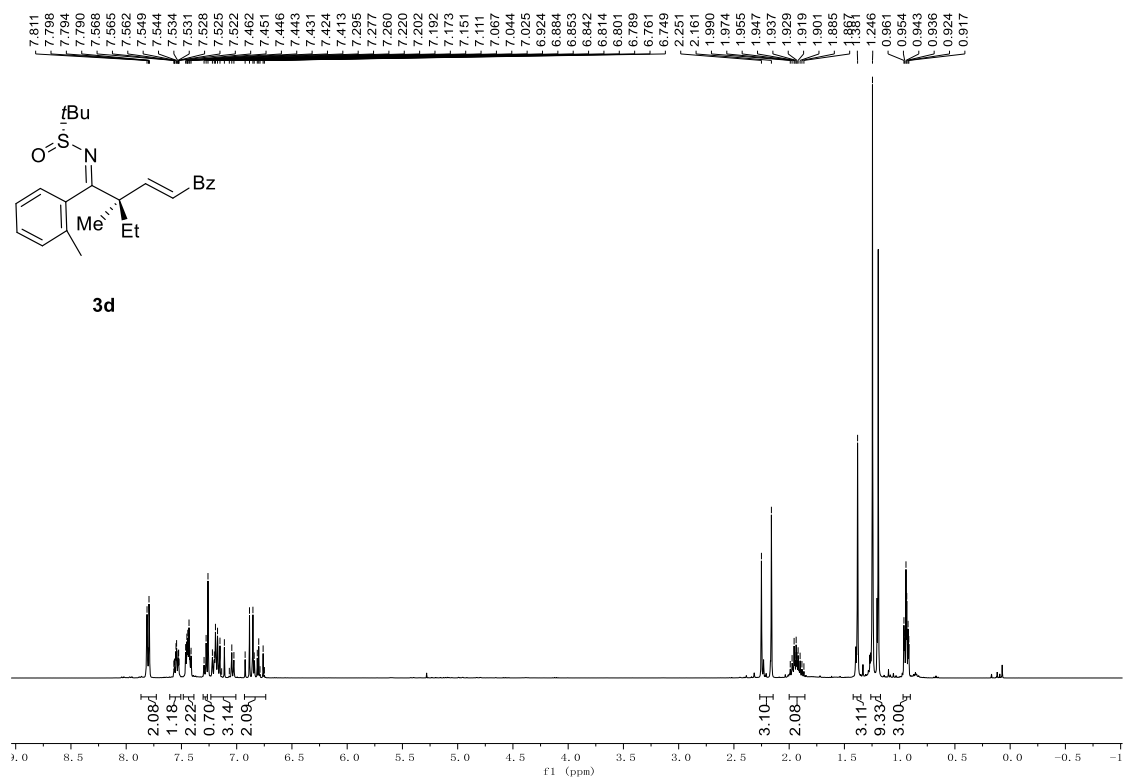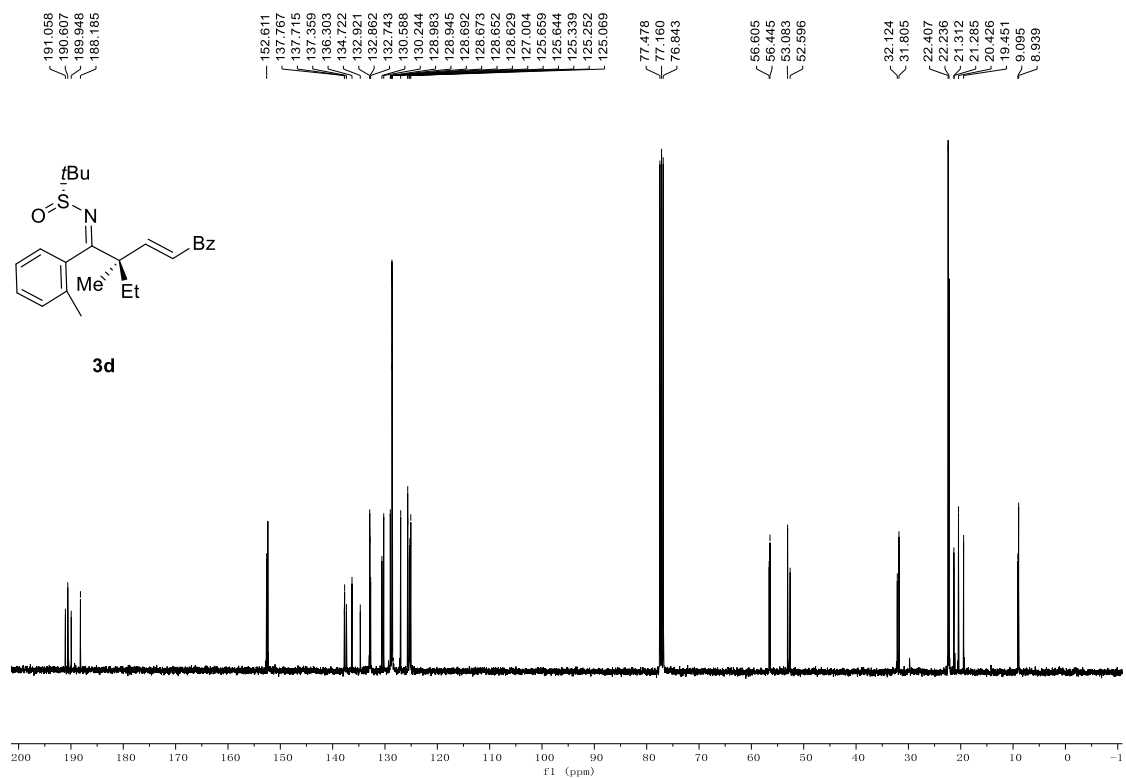

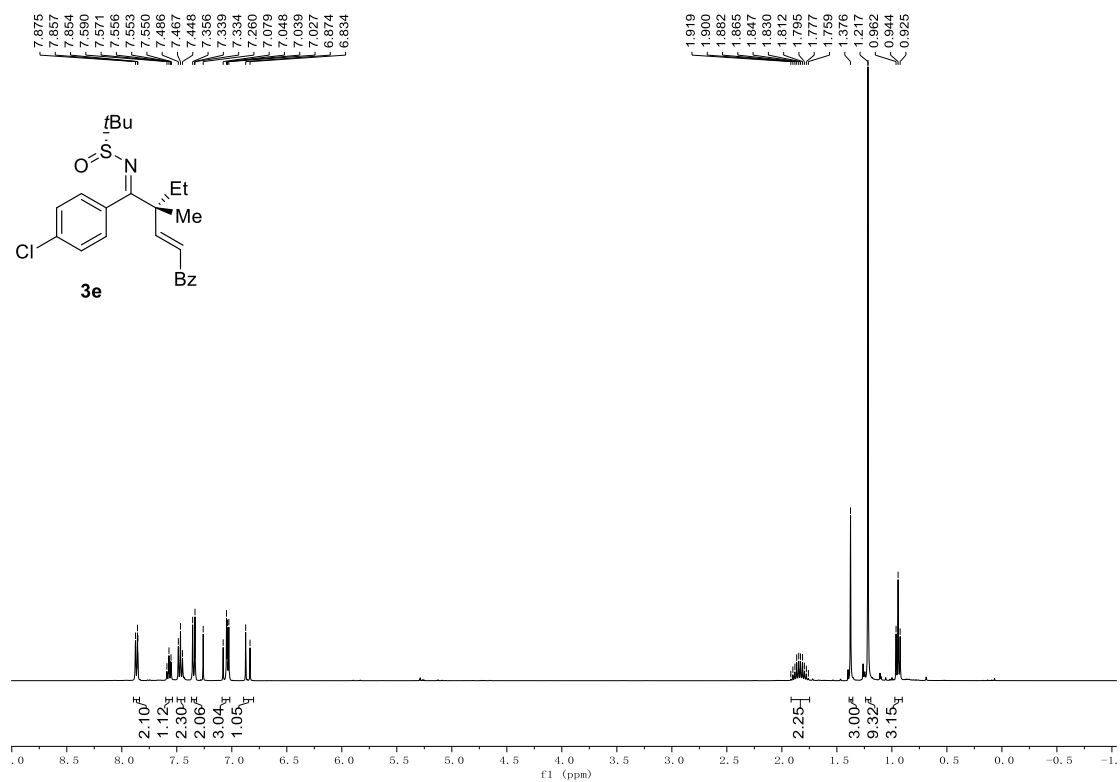

**<sup>1</sup>H NMR spectrum (CDCl<sub>3</sub>, 400 MHz) of 3e**

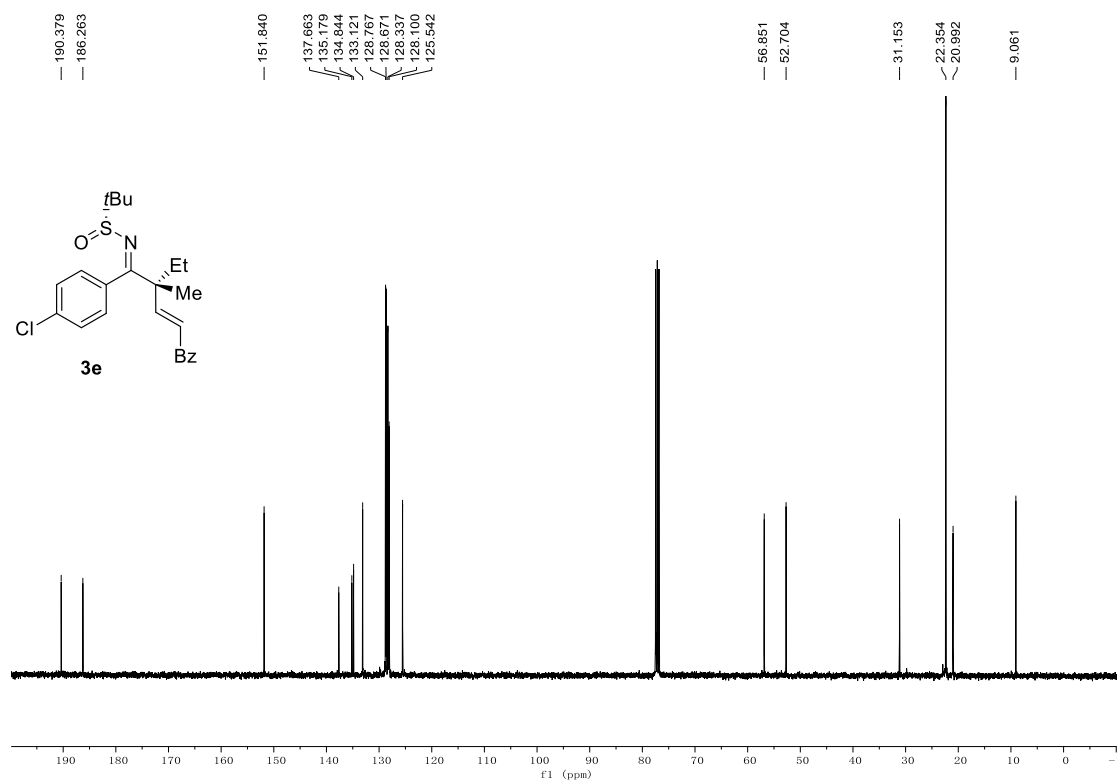

**<sup>13</sup>C NMR spectrum (CDCl<sub>3</sub>, 100 MHz) of 3e**

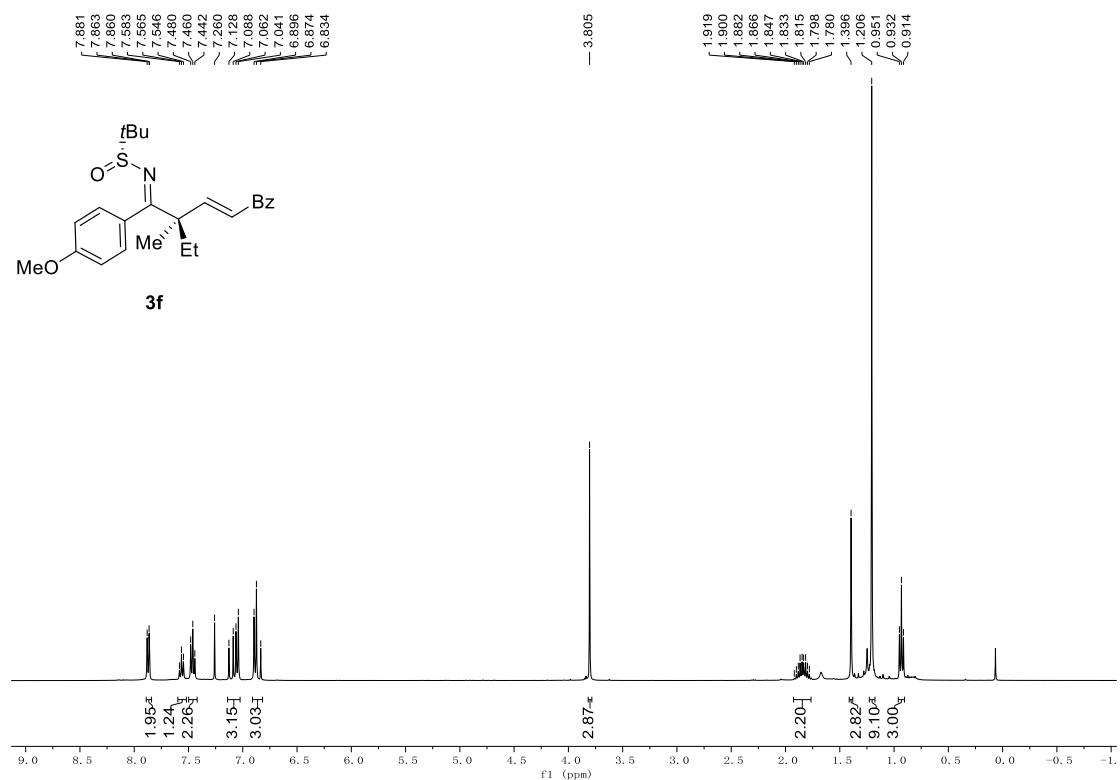

<sup>1</sup>H NMR spectrum (CDCl<sub>3</sub>, 400 MHz) of **3f**

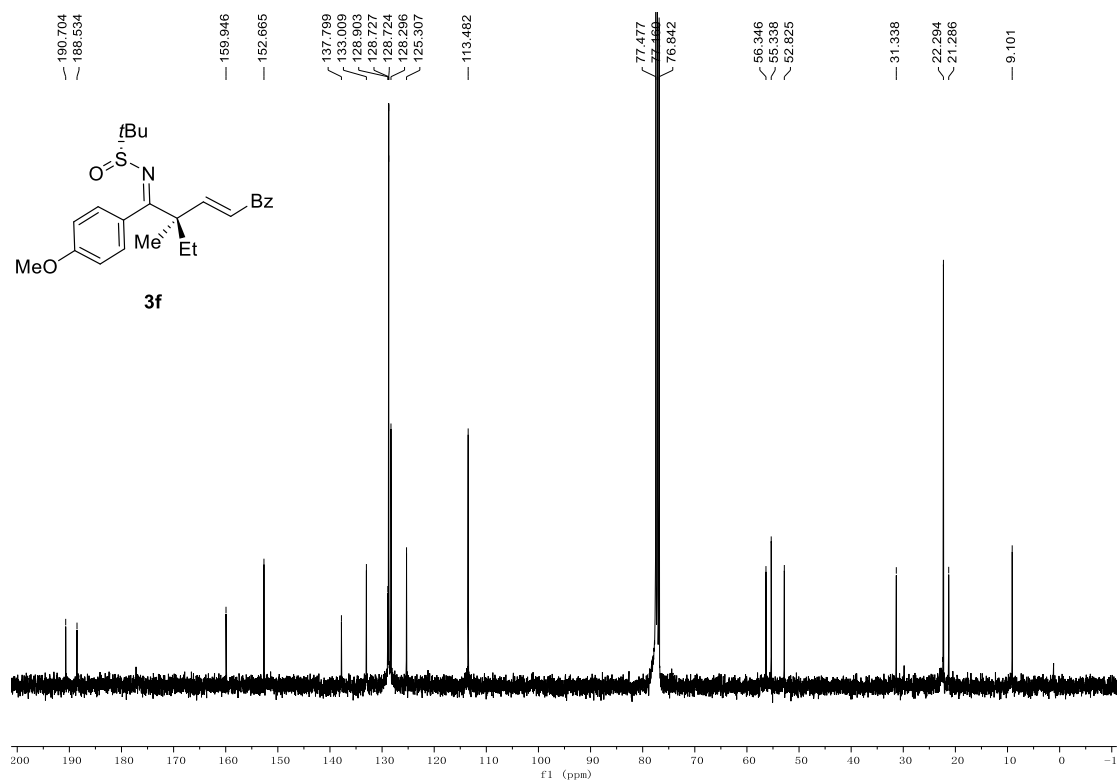

<sup>13</sup>C NMR spectrum (CDCl<sub>3</sub>, 100 MHz) of **3f**

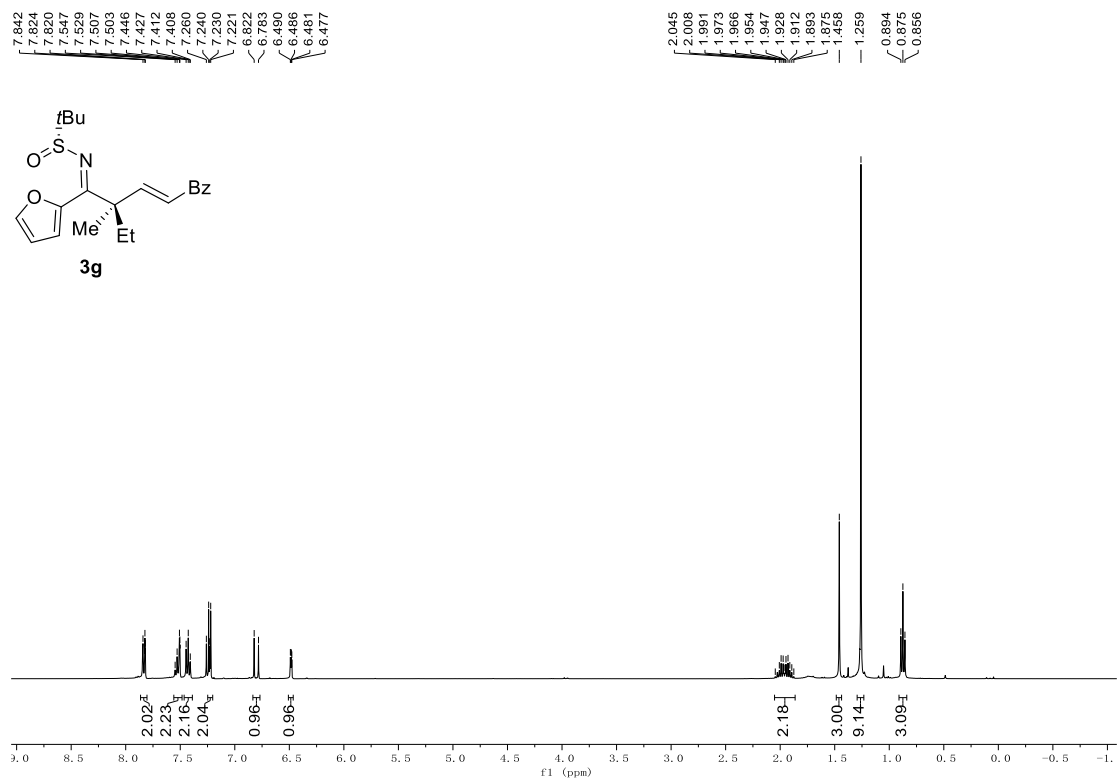

**<sup>1</sup>H NMR spectrum (CDCl<sub>3</sub>, 400 MHz) of **3g****

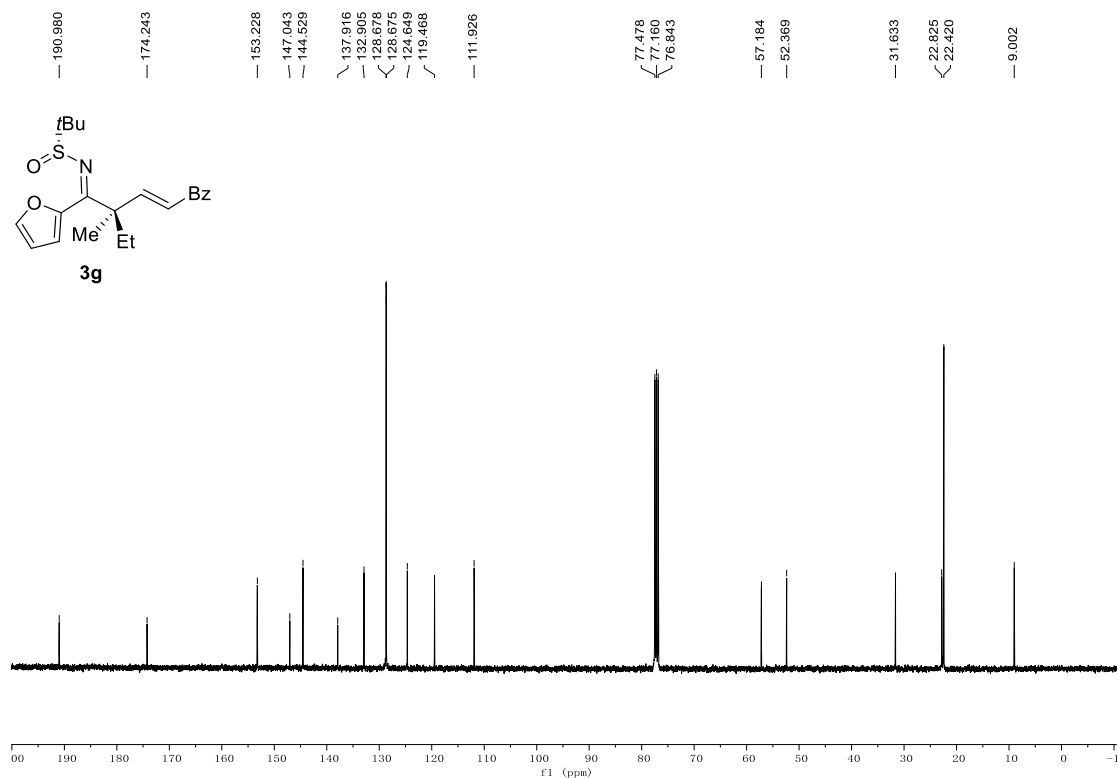

**<sup>13</sup>C NMR spectrum (CDCl<sub>3</sub>, 100 MHz) of **3g****

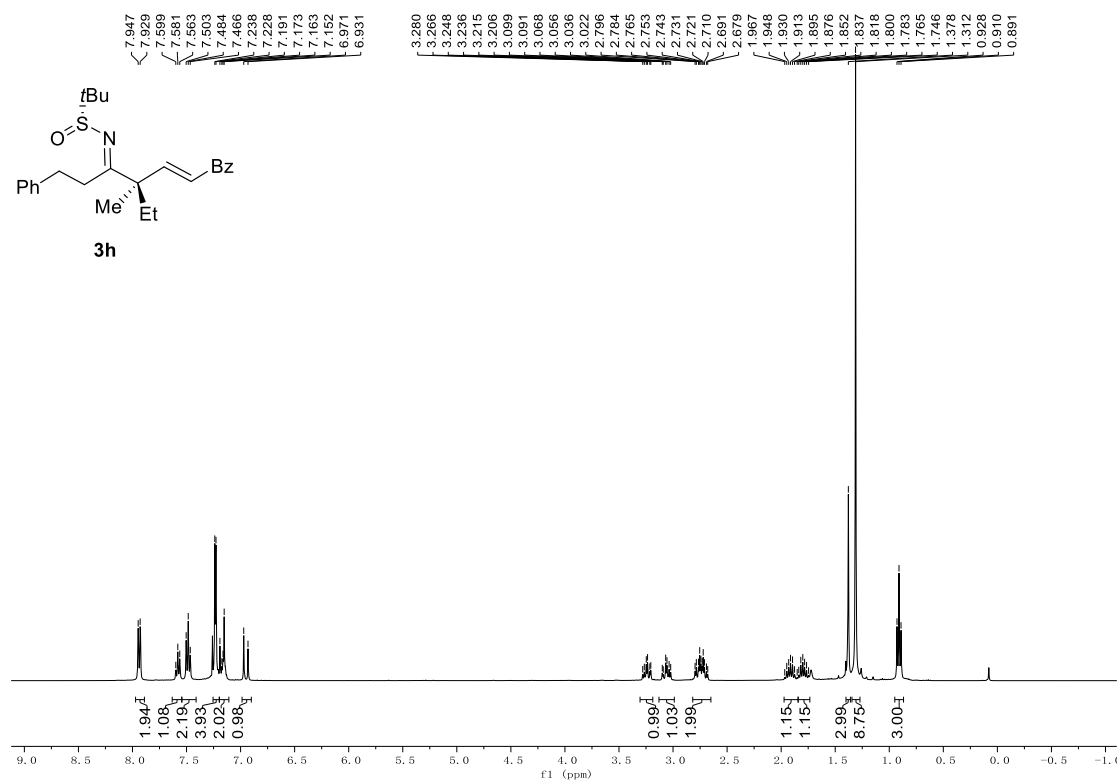

**<sup>1</sup>H NMR spectrum (CDCl<sub>3</sub>, 400 MHz) of **3h****

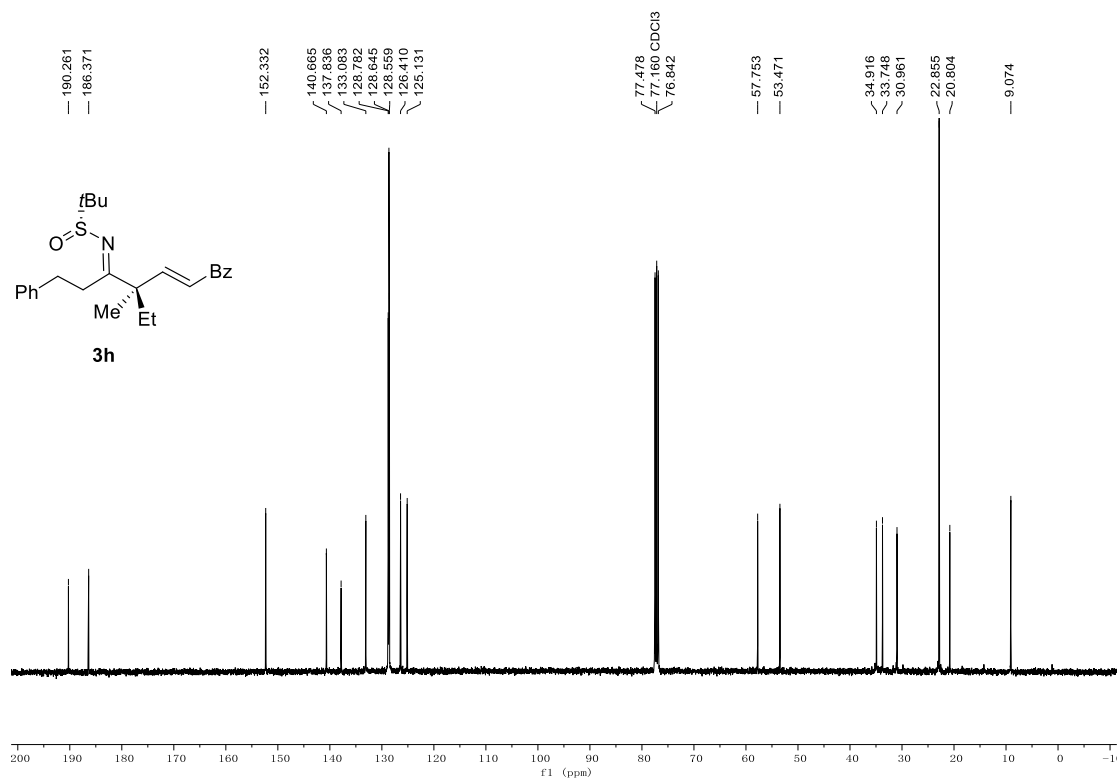

**<sup>13</sup>C NMR spectrum (CDCl<sub>3</sub>, 100 MHz) of **3h****



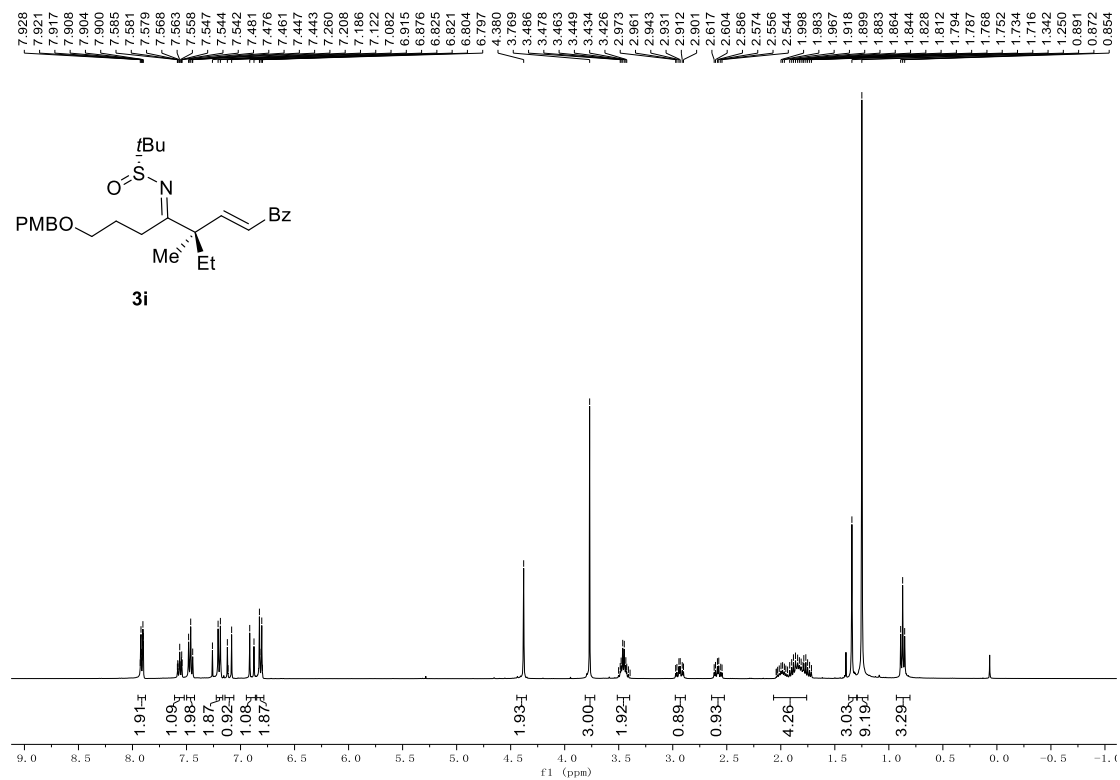

<sup>1</sup>H NMR spectrum (CDCl<sub>3</sub>, 400 MHz) of **3i**

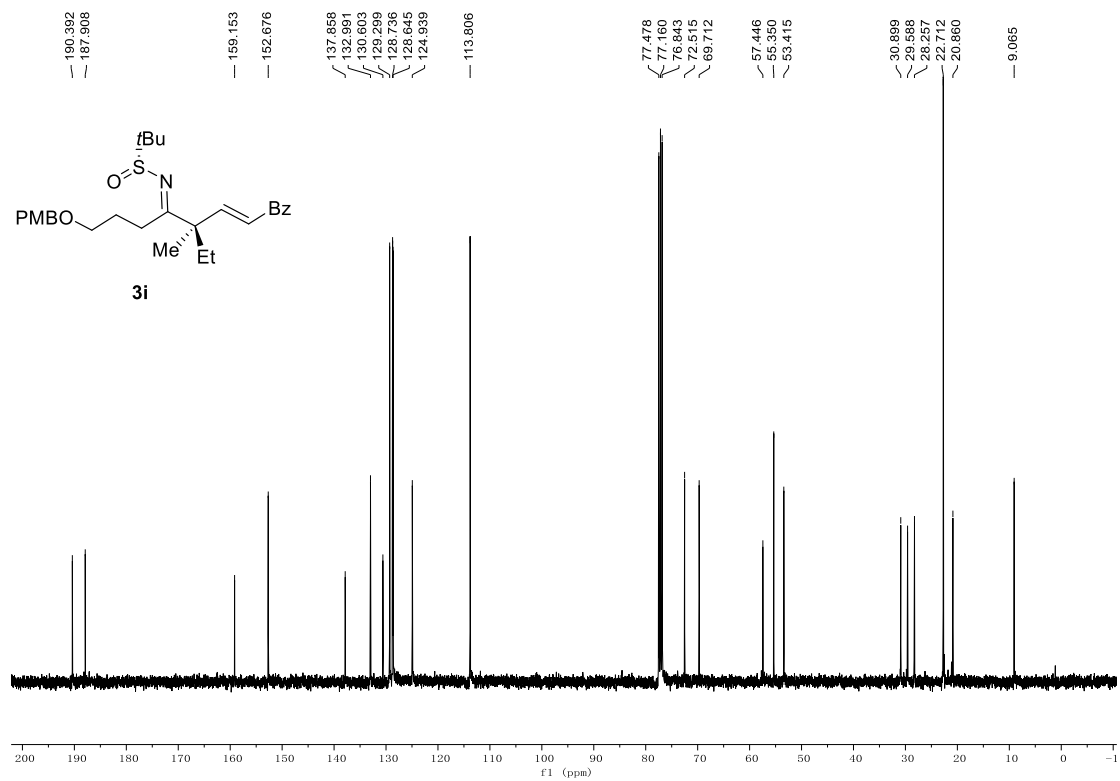

<sup>13</sup>C NMR spectrum (CDCl<sub>3</sub>, 100 MHz) of **3i**

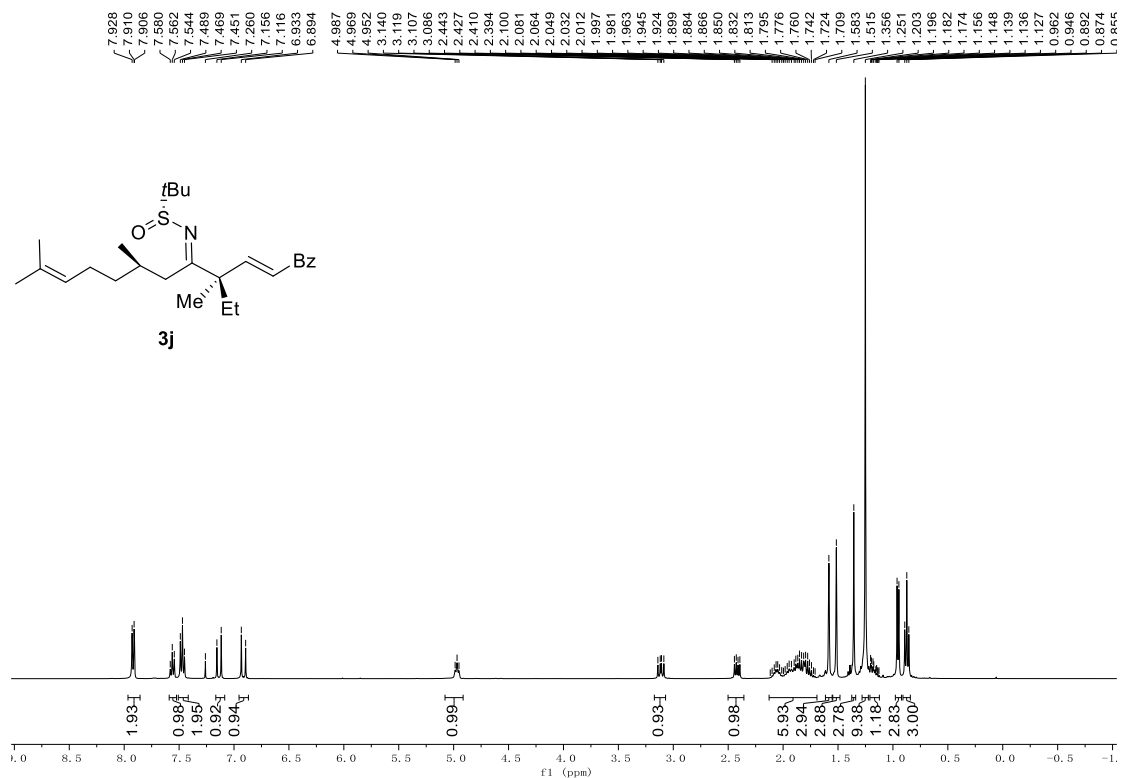

<sup>1</sup>H NMR spectrum (CDCl<sub>3</sub>, 400 MHz) of **3j**

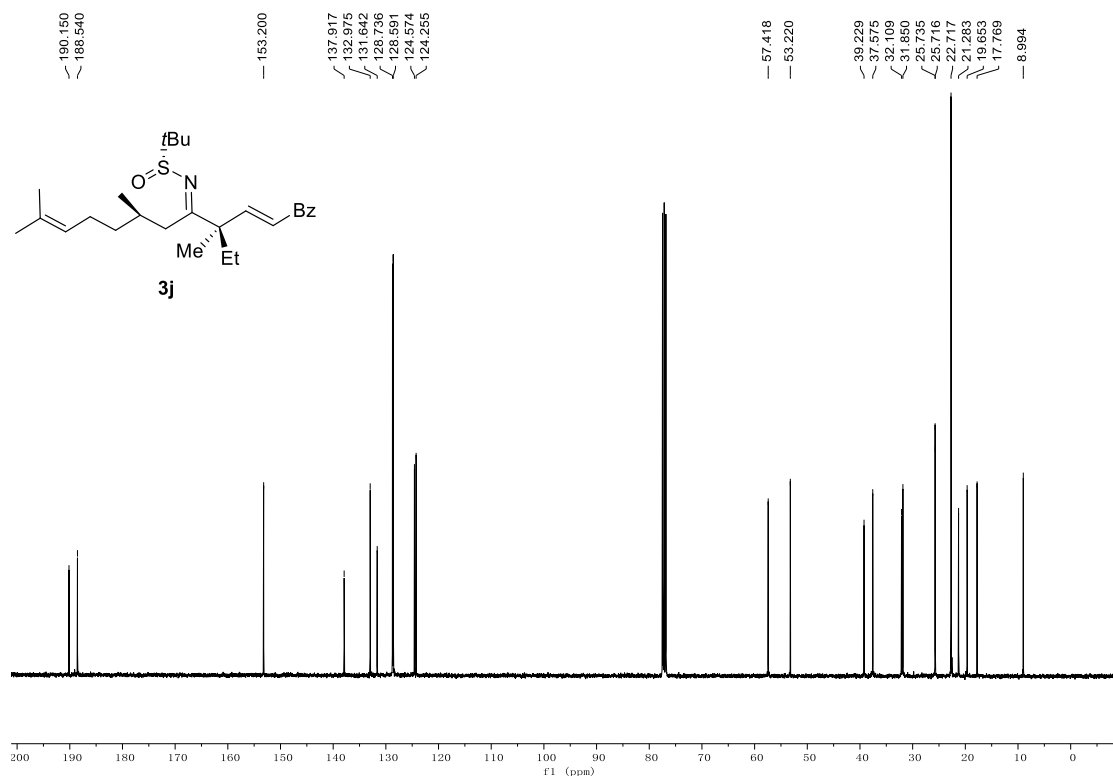

<sup>13</sup>C NMR spectrum (CDCl<sub>3</sub>, 100 MHz) of **3j**



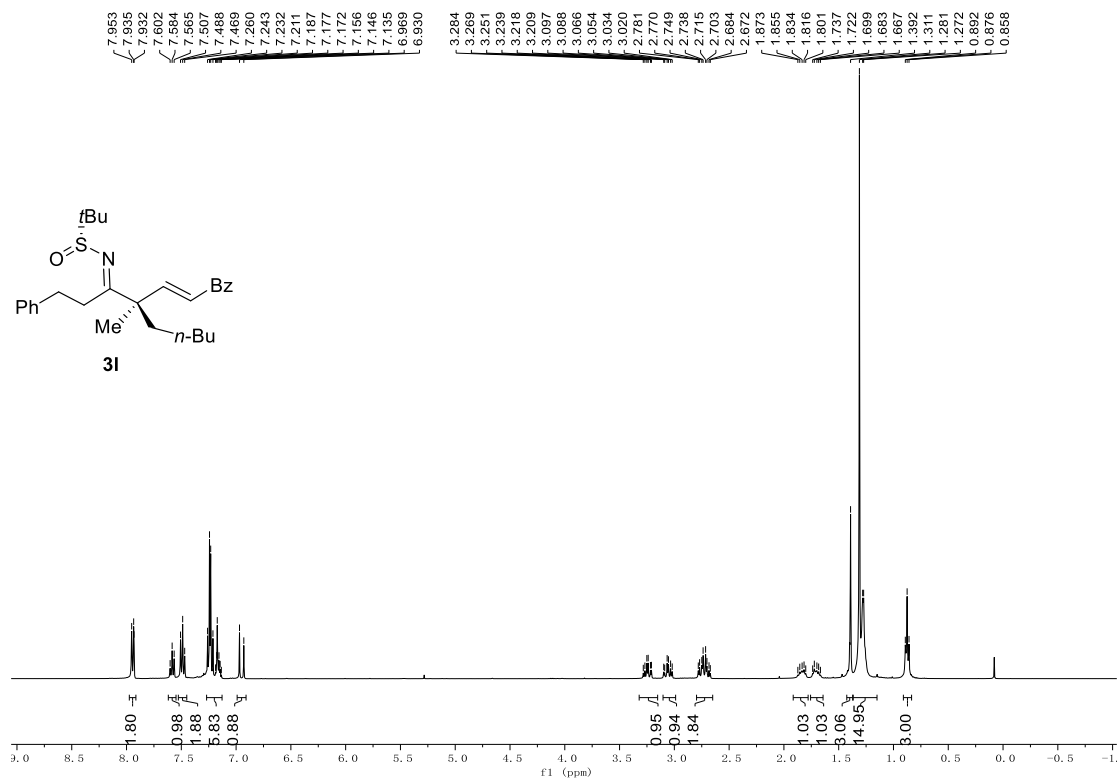

**<sup>1</sup>H NMR spectrum (CDCl<sub>3</sub>, 400 MHz) of **31****

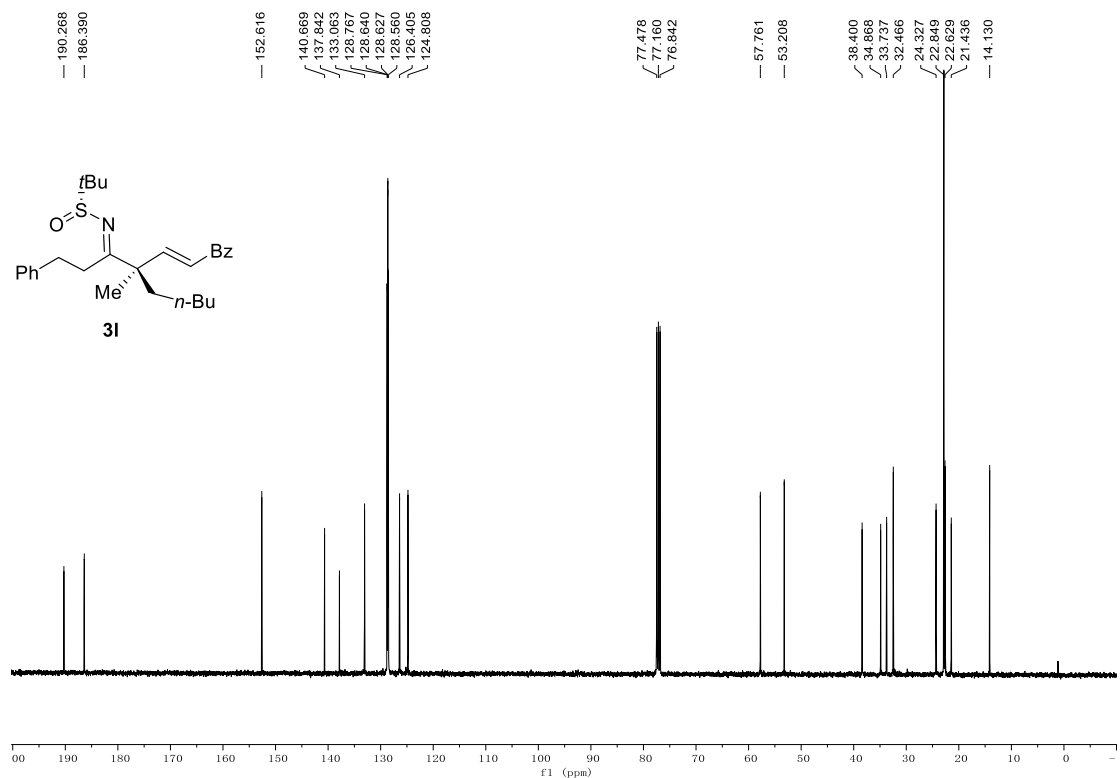

**<sup>13</sup>C NMR spectrum (CDCl<sub>3</sub>, 100 MHz) of **31****

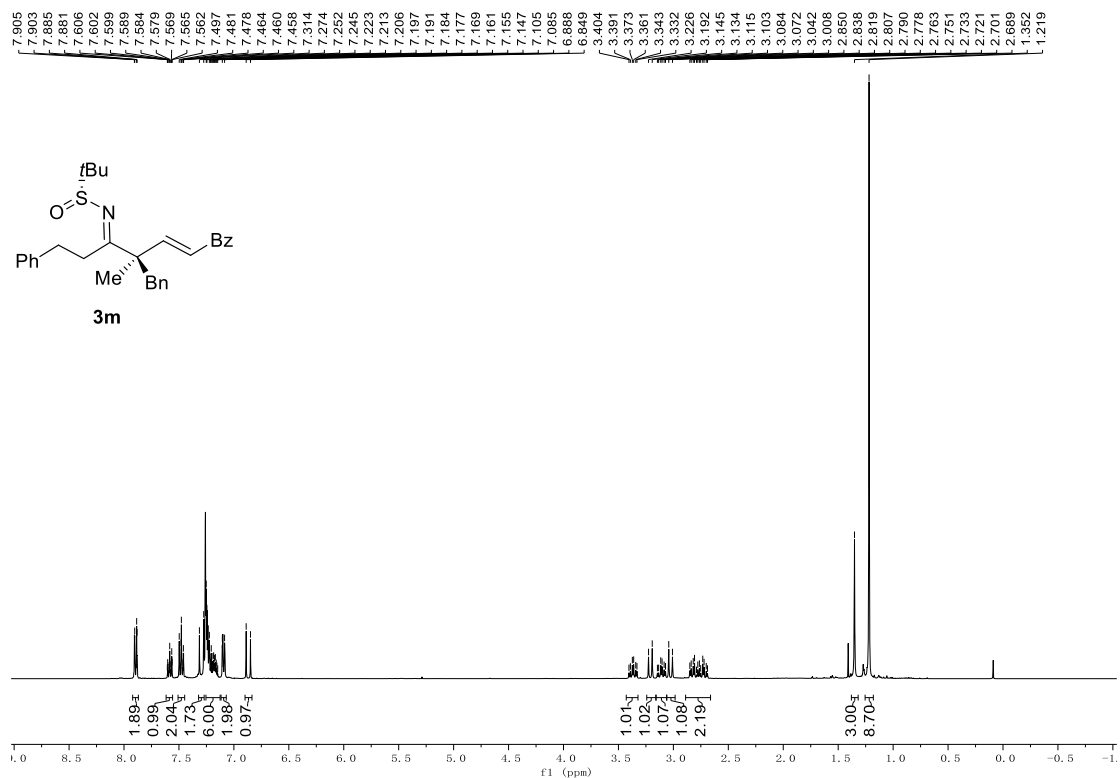

<sup>1</sup>H NMR spectrum (CDCl<sub>3</sub>, 400 MHz) of **3m**

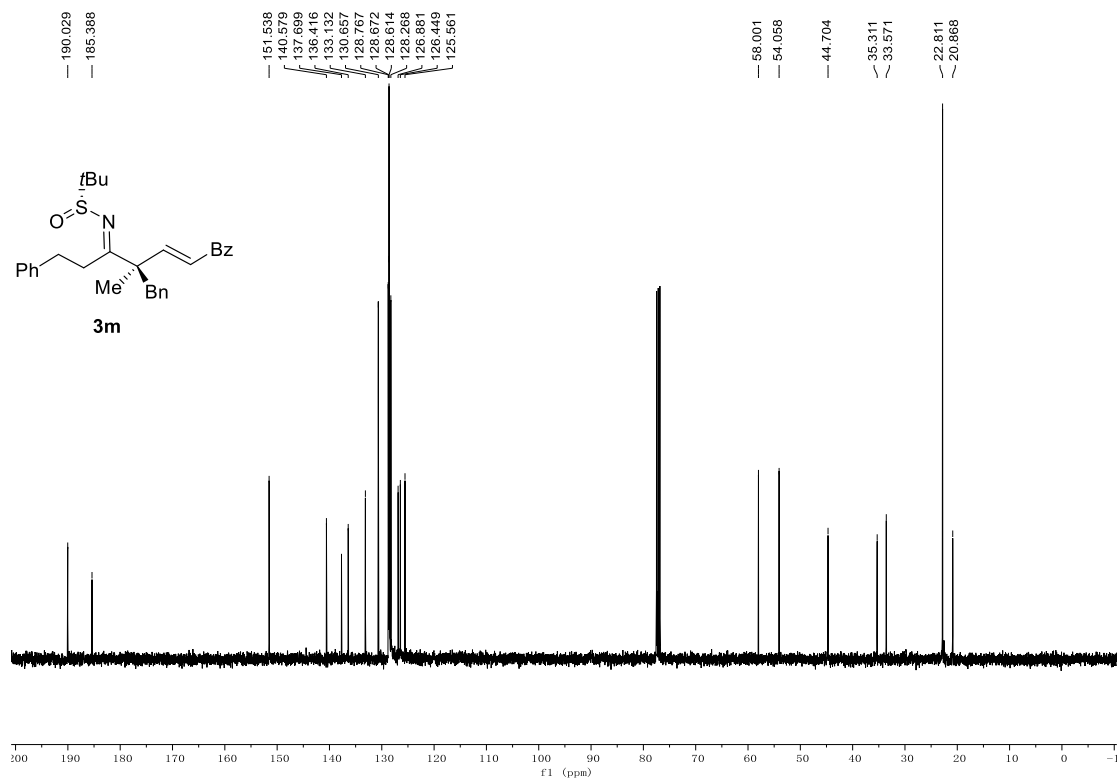

<sup>13</sup>C NMR spectrum (CDCl<sub>3</sub>, 100 MHz) of **3m**

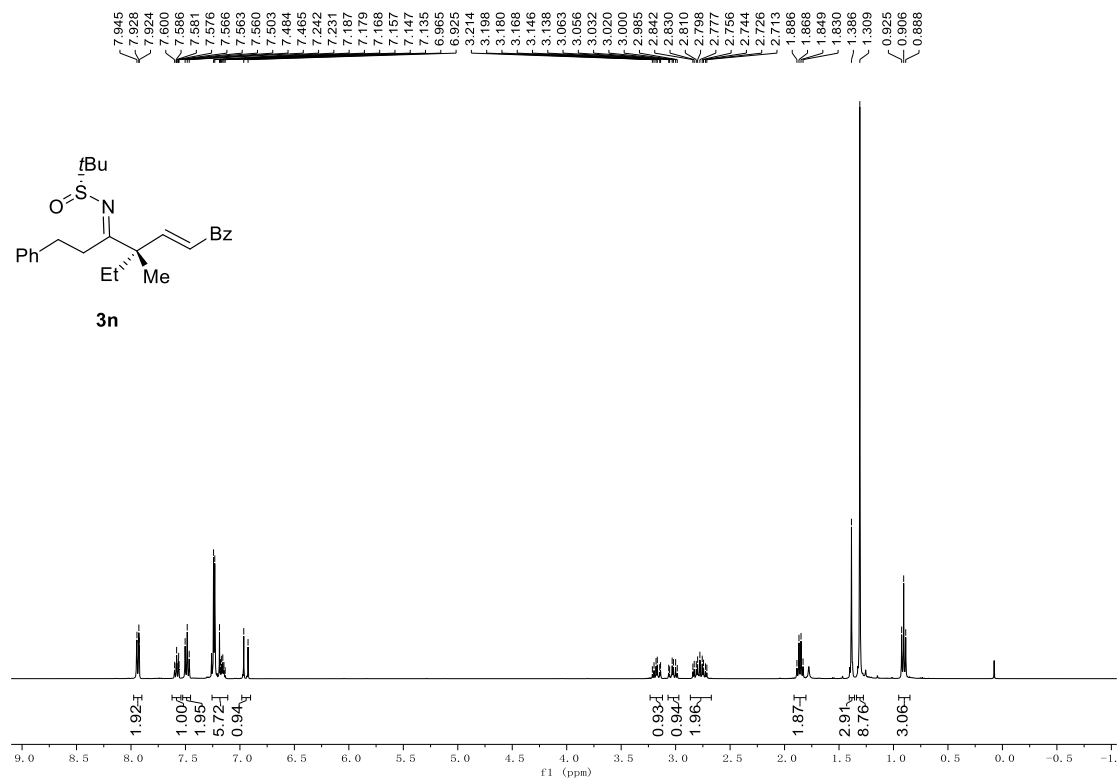

<sup>1</sup>H NMR spectrum (CDCl<sub>3</sub>, 400 MHz) of **3n**

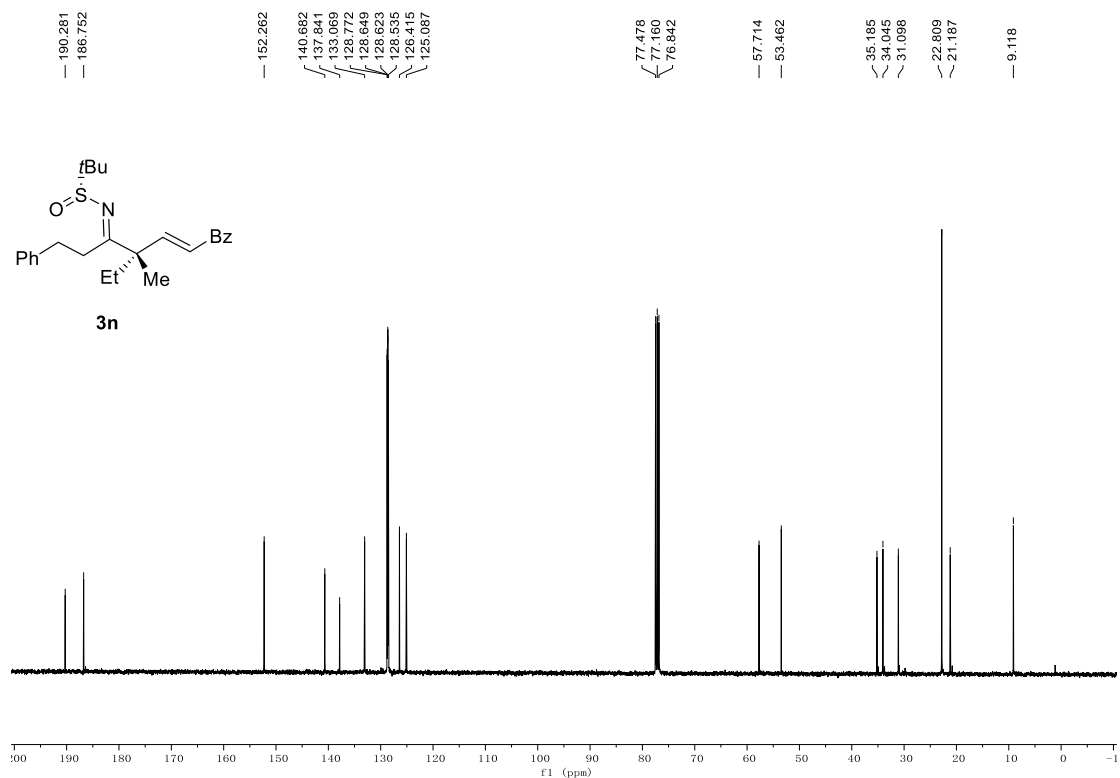

<sup>13</sup>C NMR spectrum (CDCl<sub>3</sub>, 100 MHz) of **3n**

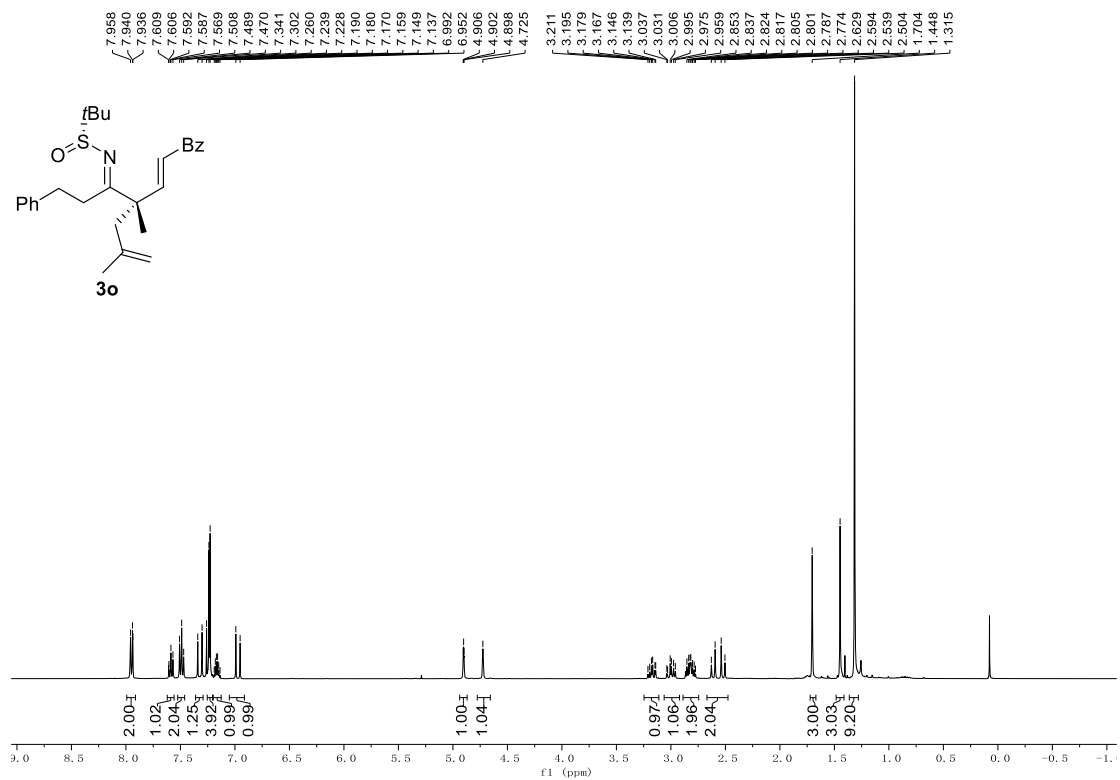

<sup>1</sup>H NMR spectrum (CDCl<sub>3</sub>, 400 MHz) of **3o**

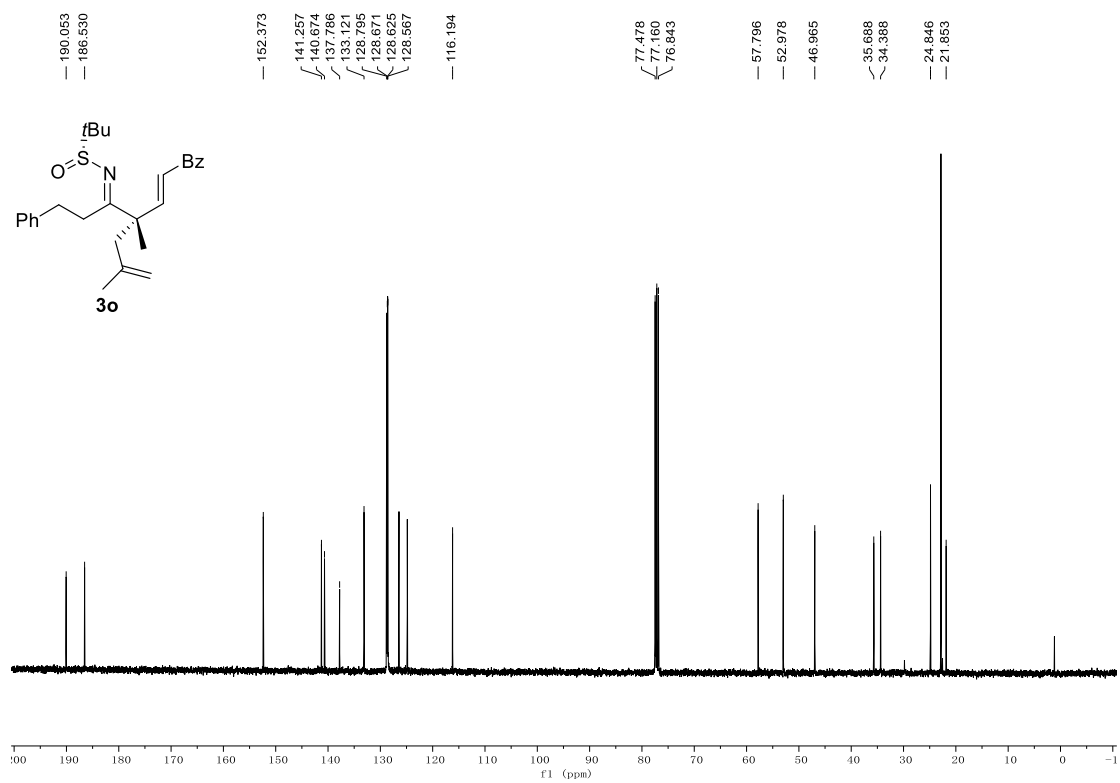

<sup>13</sup>C NMR spectrum (CDCl<sub>3</sub>, 100 MHz) of **3o**

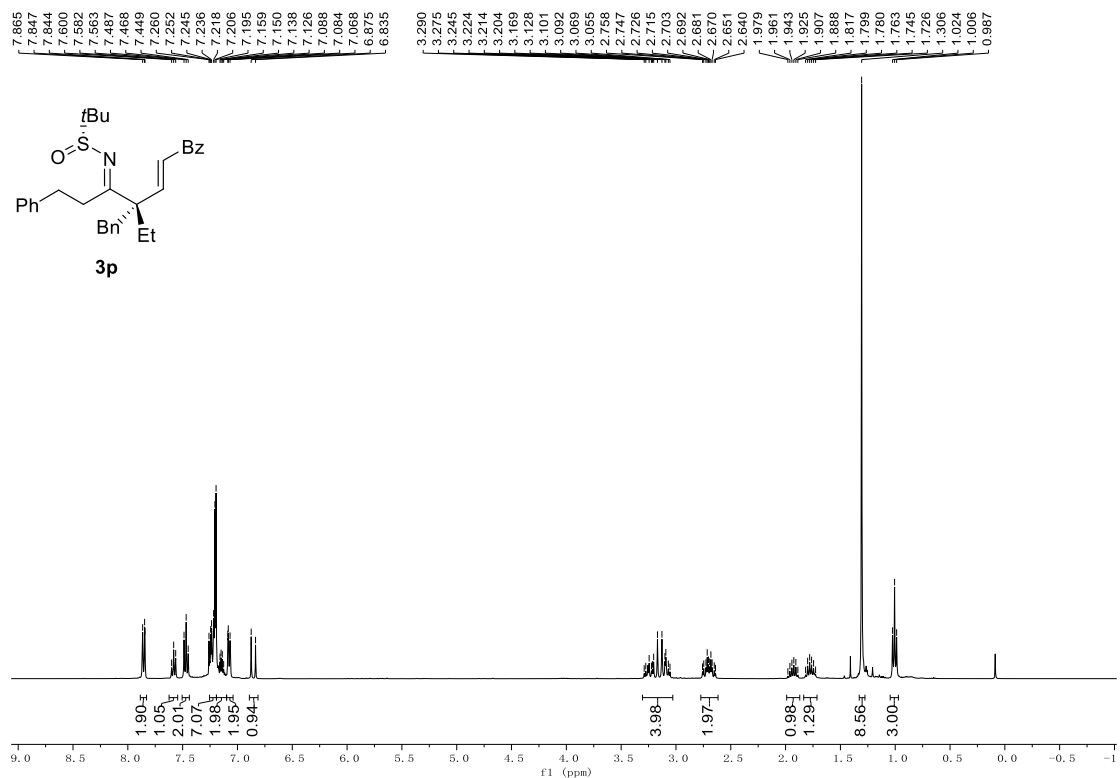

**<sup>1</sup>H NMR spectrum (CDCl<sub>3</sub>, 400 MHz) of 3p**

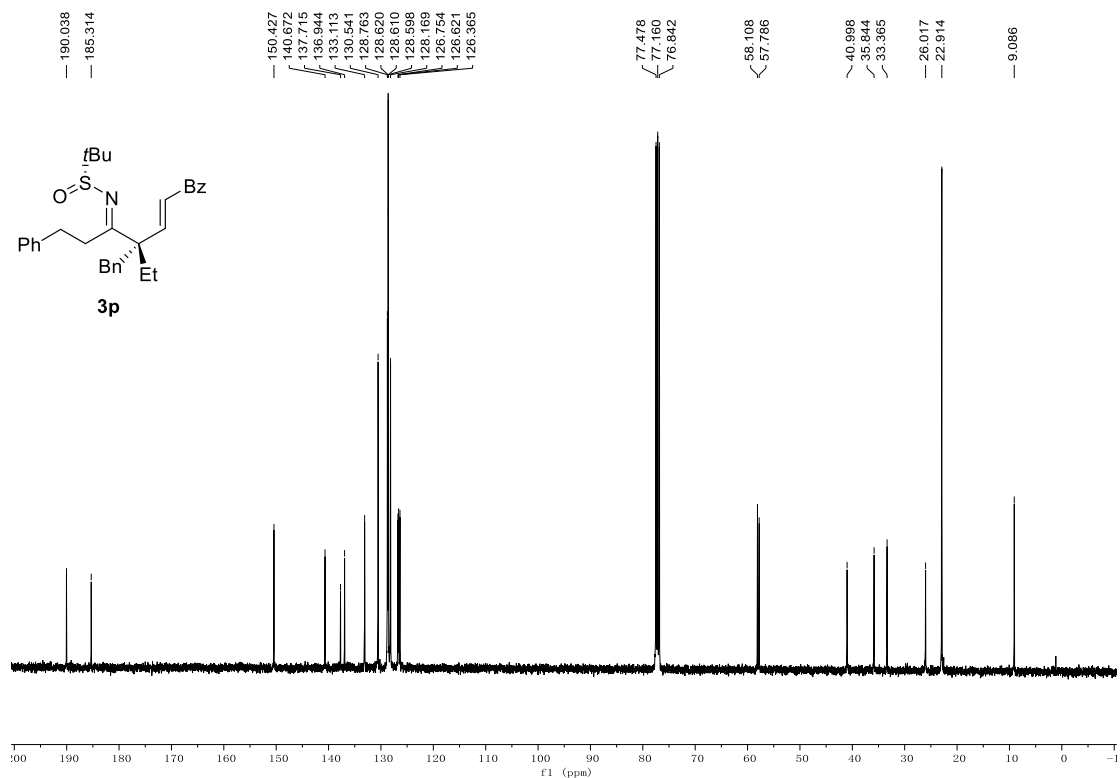

**<sup>13</sup>C NMR spectrum (CDCl<sub>3</sub>, 100 MHz) of 3p**



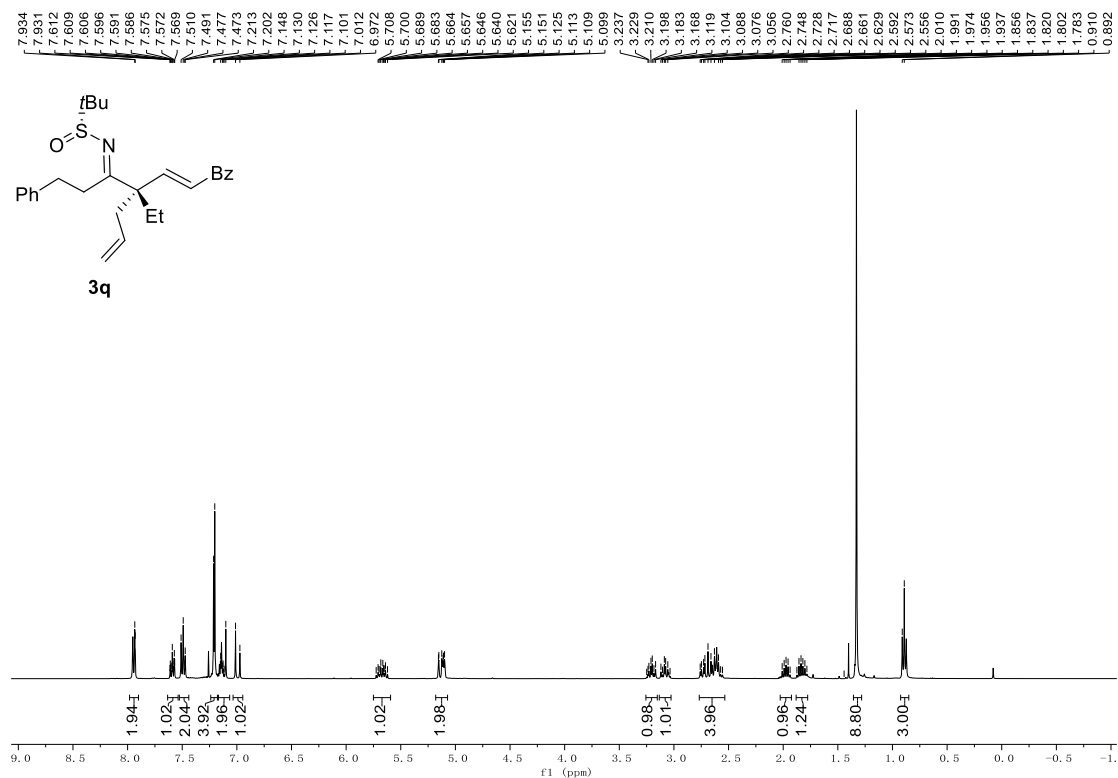

<sup>1</sup>H NMR spectrum (CDCl<sub>3</sub>, 400 MHz) of **3q**

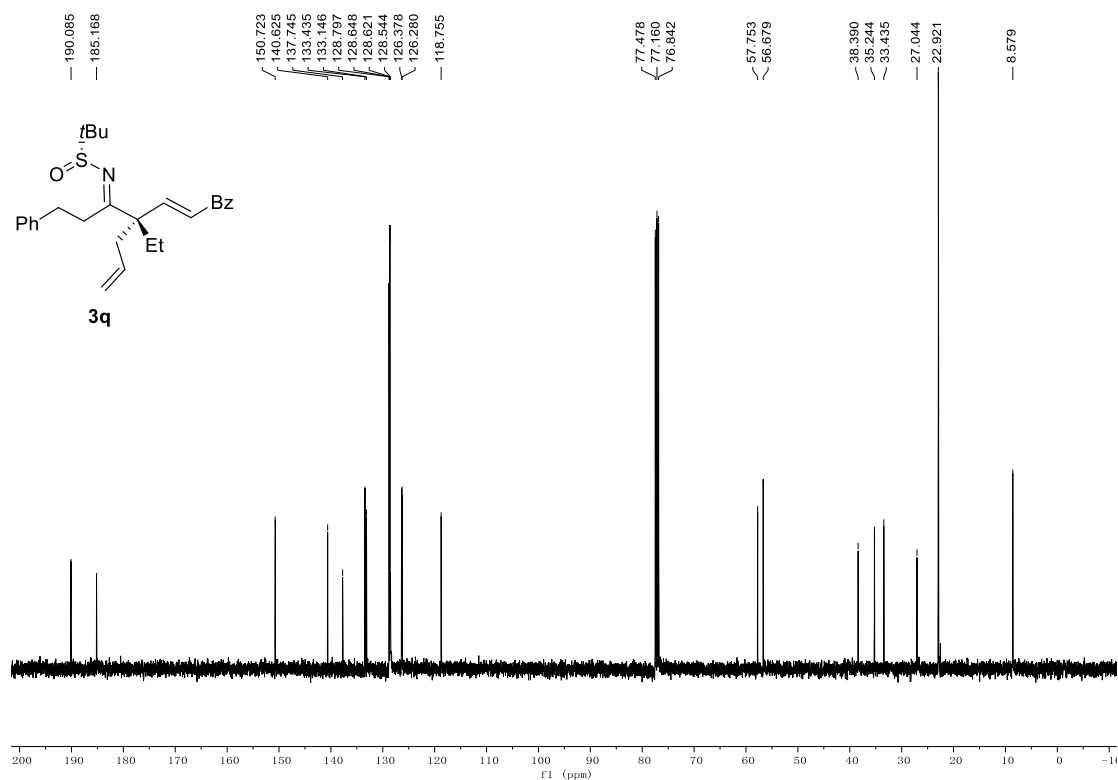

<sup>13</sup>C NMR spectrum (CDCl<sub>3</sub>, 100 MHz) of **3q**

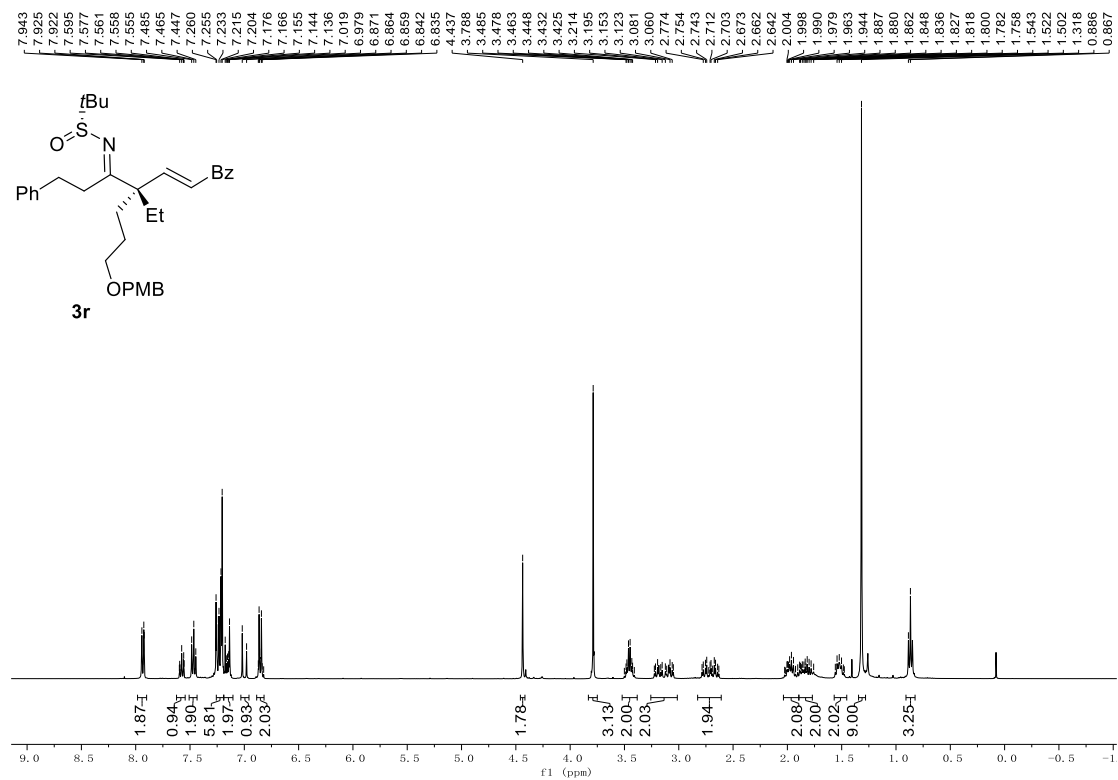

<sup>1</sup>H NMR spectrum (CDCl<sub>3</sub>, 400 MHz) of 3r

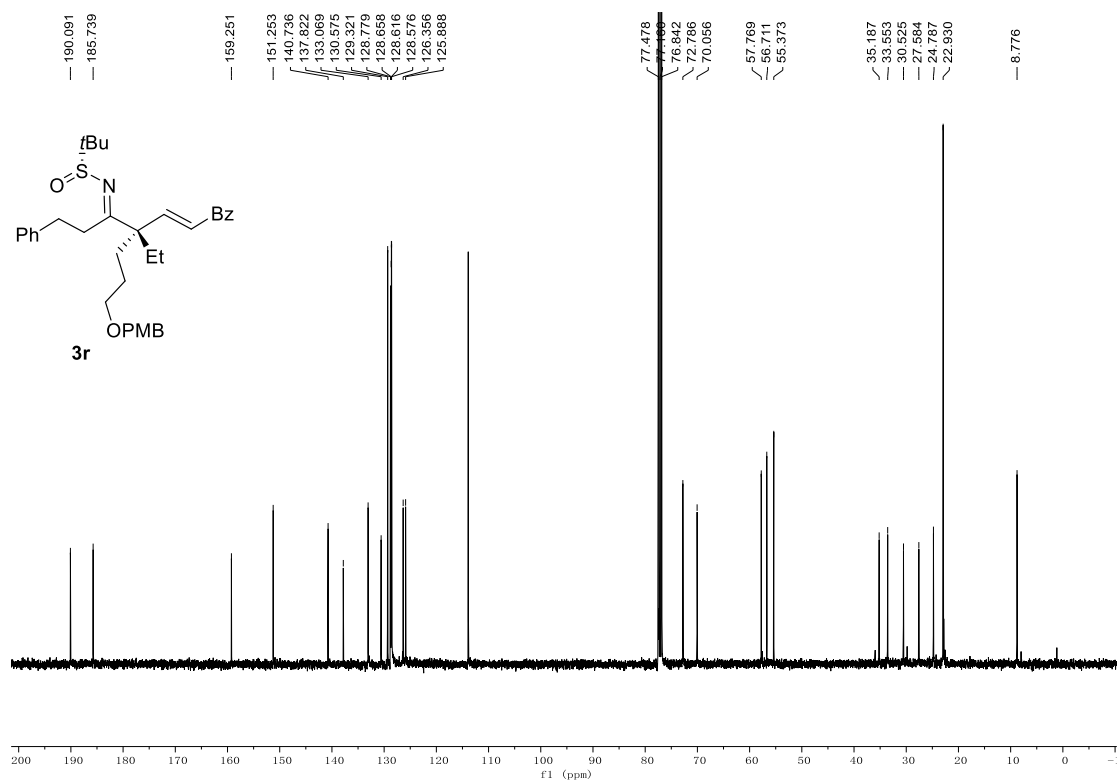

<sup>13</sup>C NMR spectrum (CDCl<sub>3</sub>, 100 MHz) of 3r

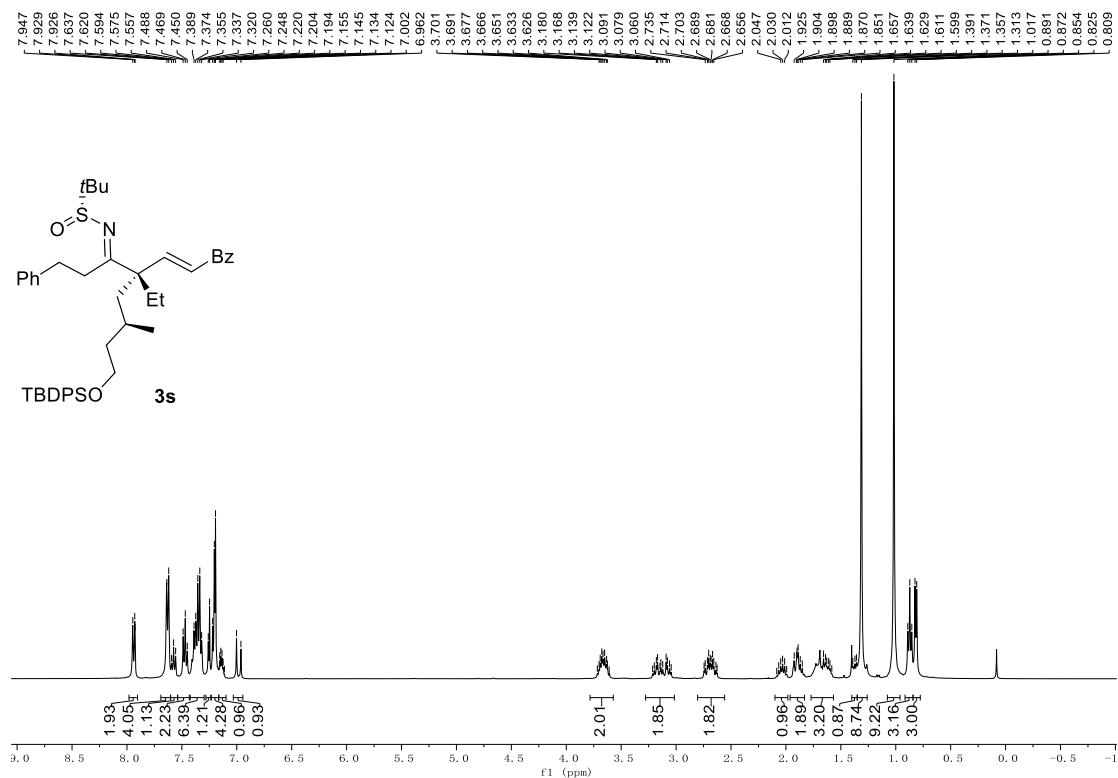

$^1\text{H}$  NMR spectrum ( $\text{CDCl}_3$ , 400 MHz) of **3s**

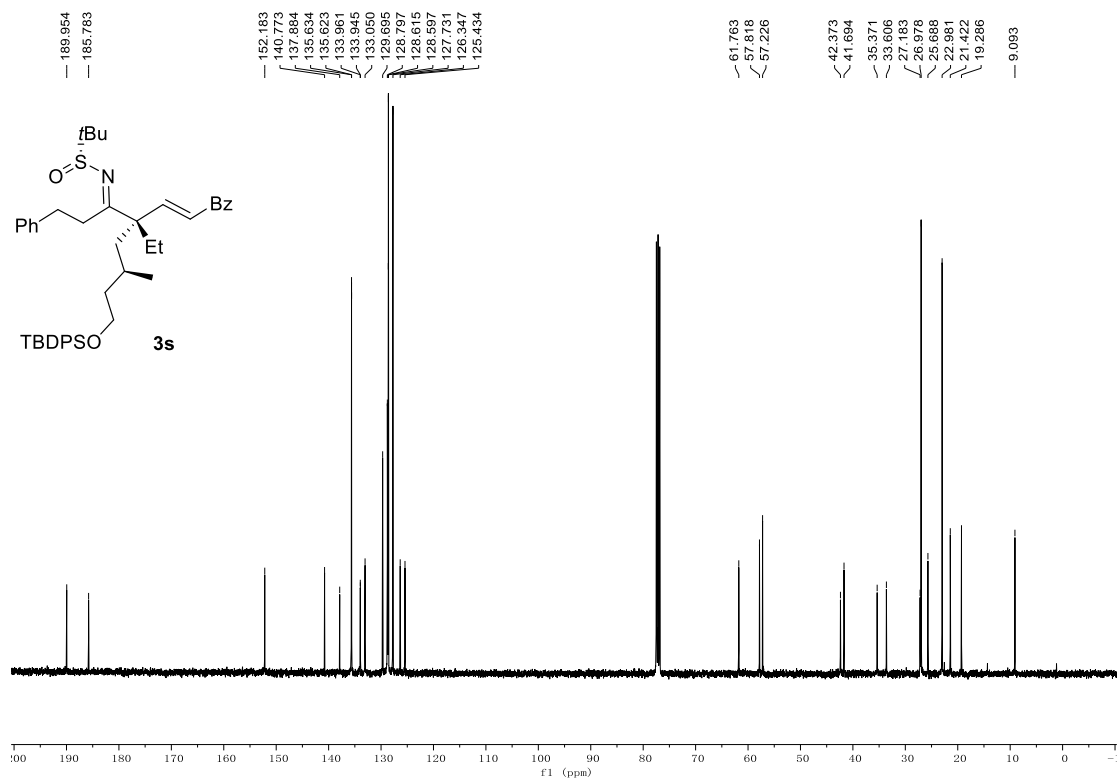

$^{13}\text{C}$  NMR spectrum ( $\text{CDCl}_3$ , 100 MHz) of **3s**

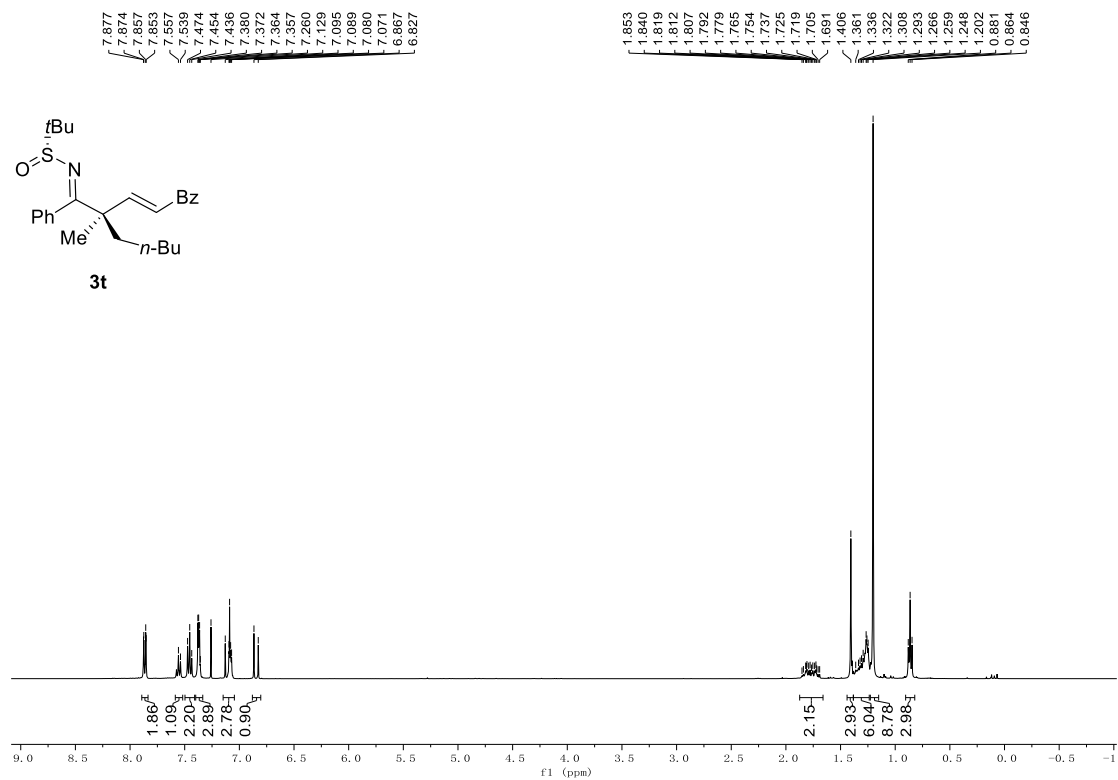

**<sup>1</sup>H NMR spectrum (CDCl<sub>3</sub>, 400 MHz) of 3t**

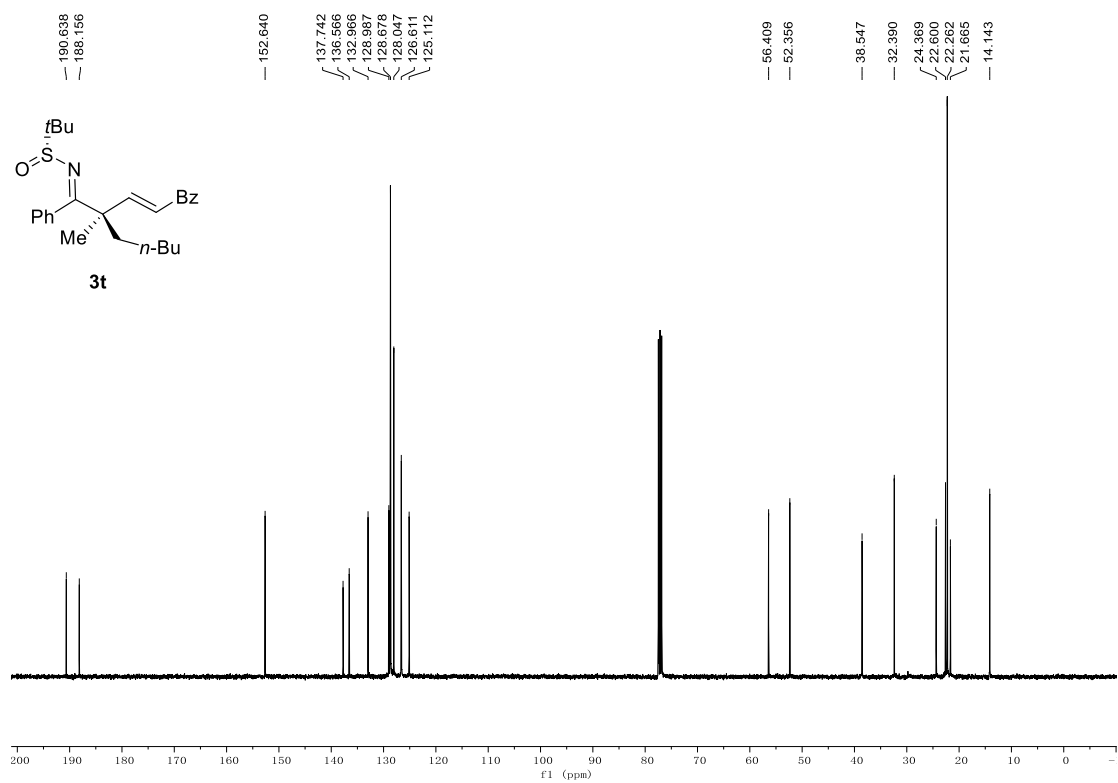

**<sup>13</sup>C NMR spectrum (CDCl<sub>3</sub>, 100 MHz) of 3t**

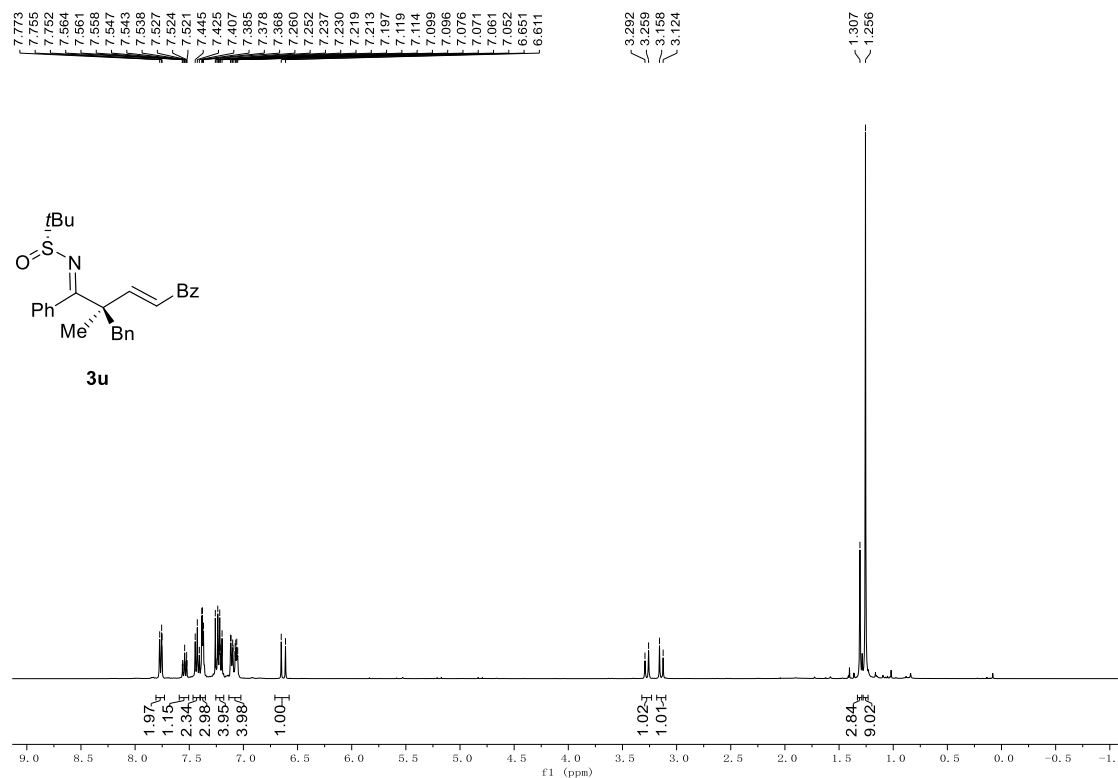

<sup>1</sup>H NMR spectrum (CDCl<sub>3</sub>, 400 MHz) of **3u**

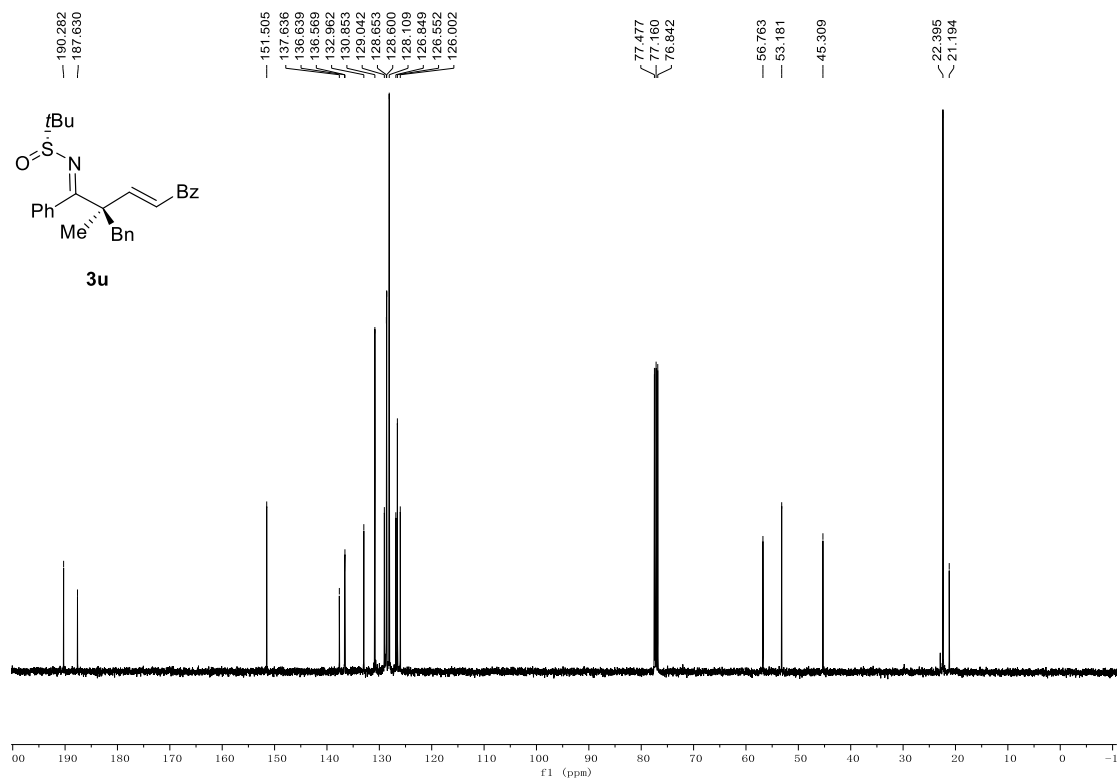

<sup>13</sup>C NMR spectrum (CDCl<sub>3</sub>, 100 MHz) of **3u**

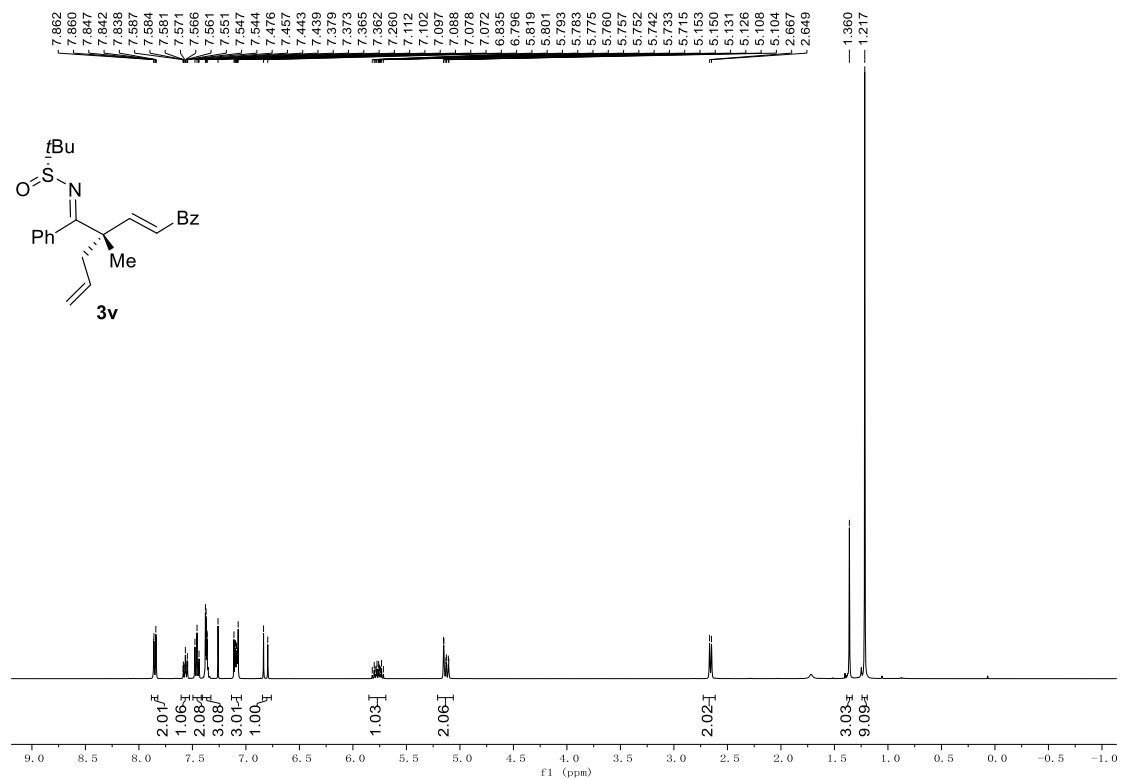

<sup>1</sup>H NMR spectrum (CDCl<sub>3</sub>, 400 MHz) of **3v**

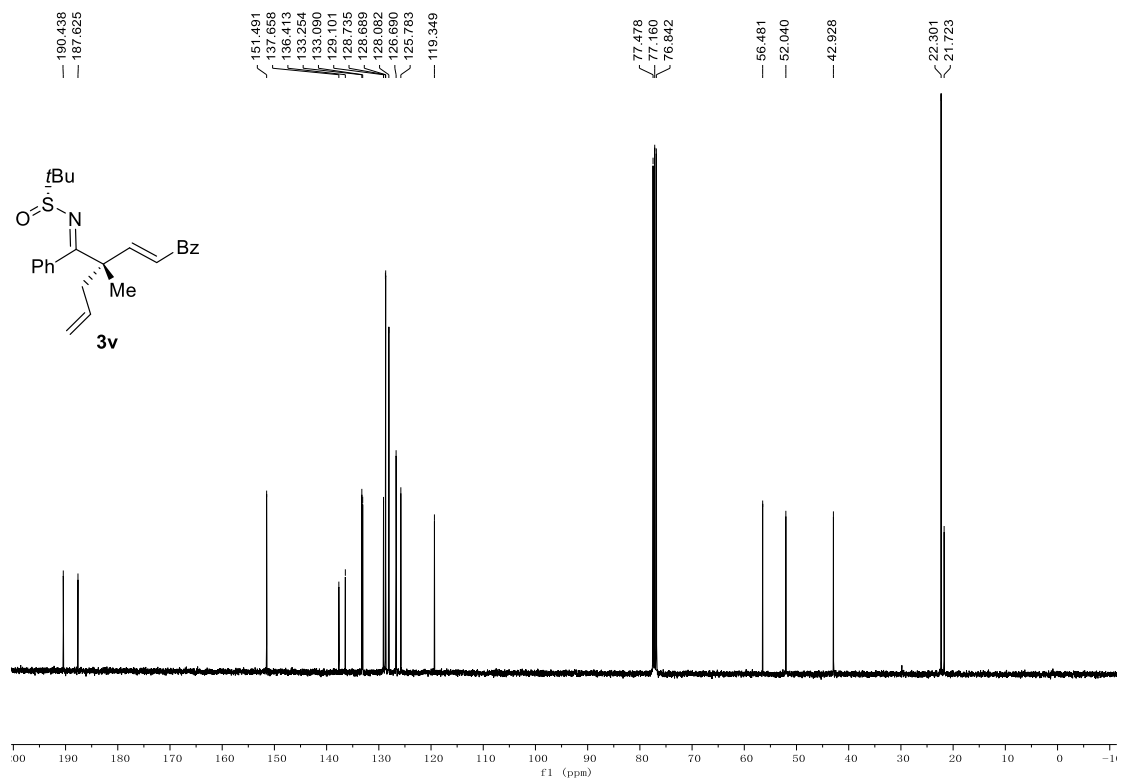

<sup>13</sup>C NMR spectrum (CDCl<sub>3</sub>, 100 MHz) of **3v**

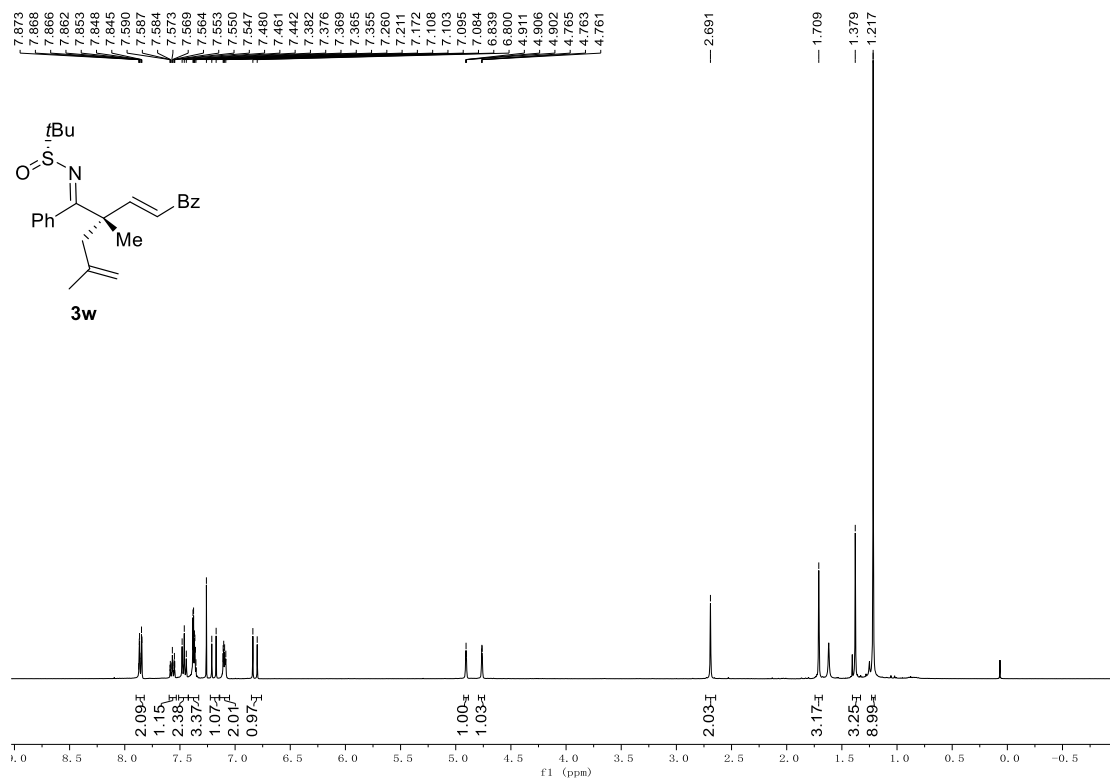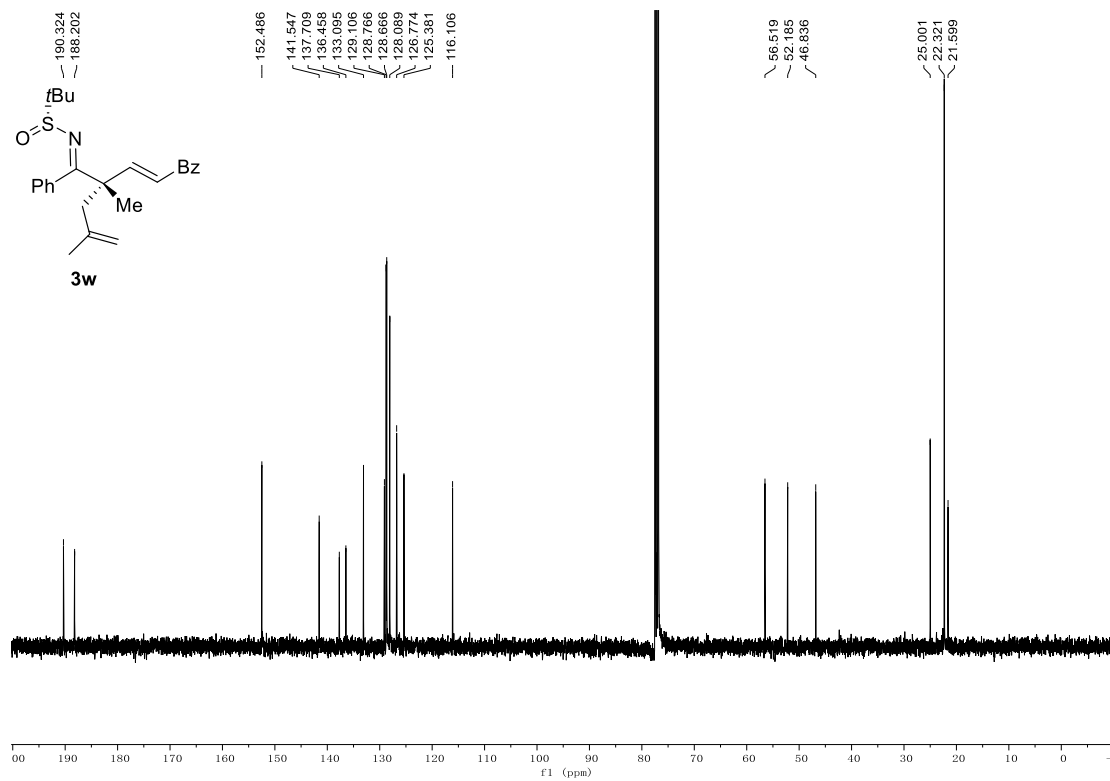

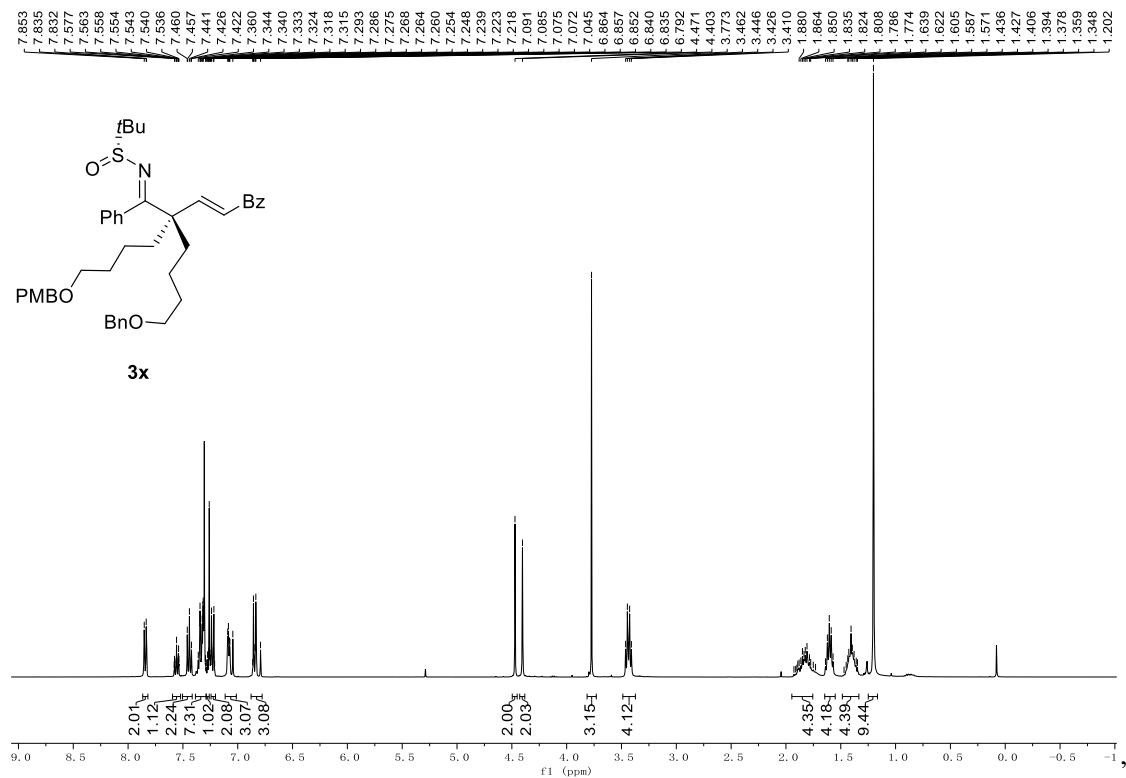

<sup>1</sup>H NMR spectrum (CDCl<sub>3</sub>, 400 MHz) of 3x

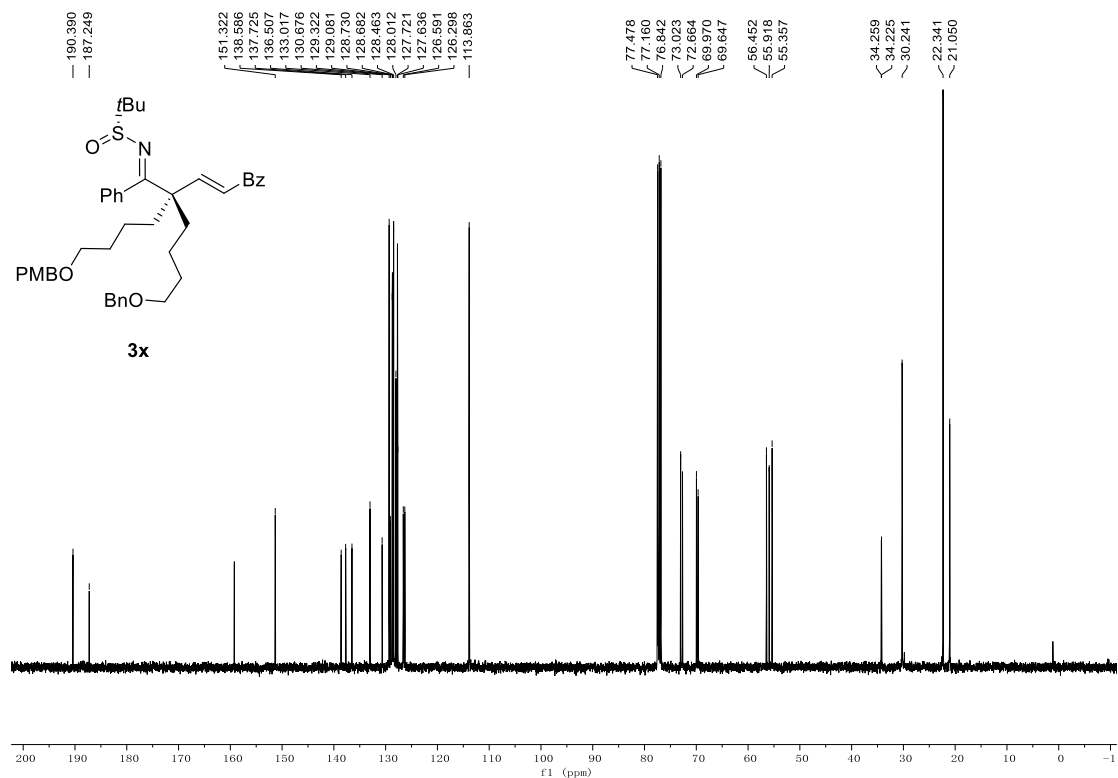

<sup>13</sup>C NMR spectrum (CDCl<sub>3</sub>, 100 MHz) of 3x



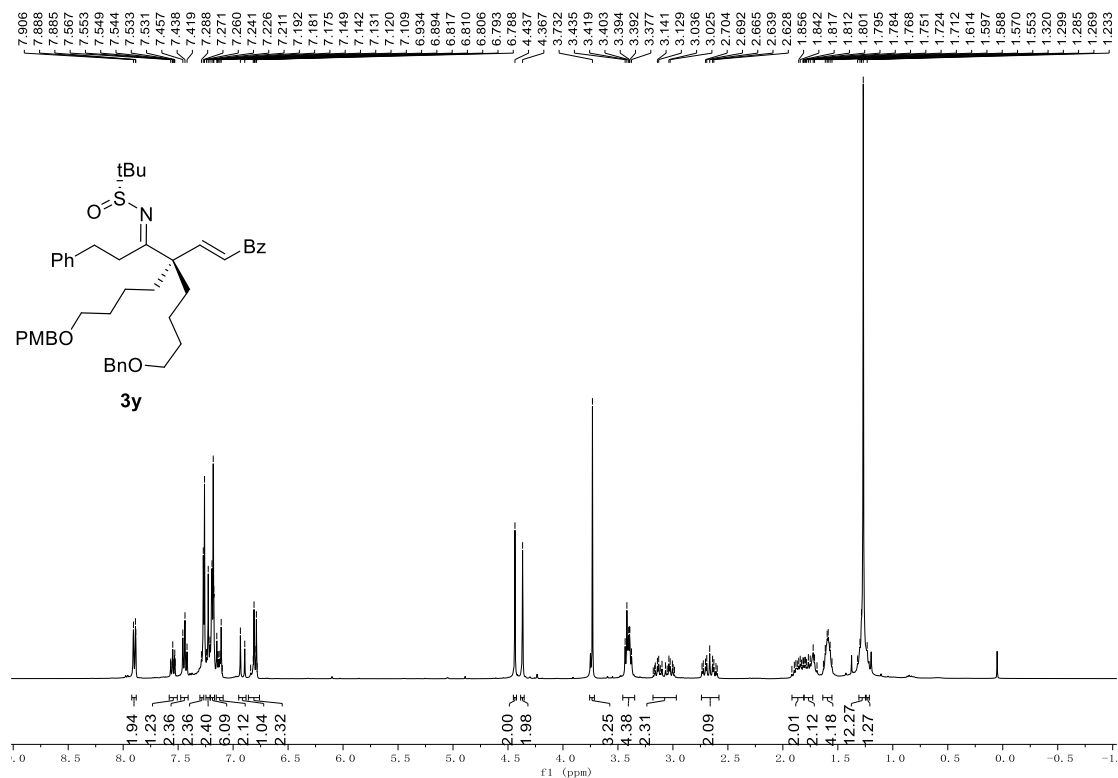

<sup>13</sup>C NMR spectrum (CDCl<sub>3</sub>, 100 MHz) of **3y**

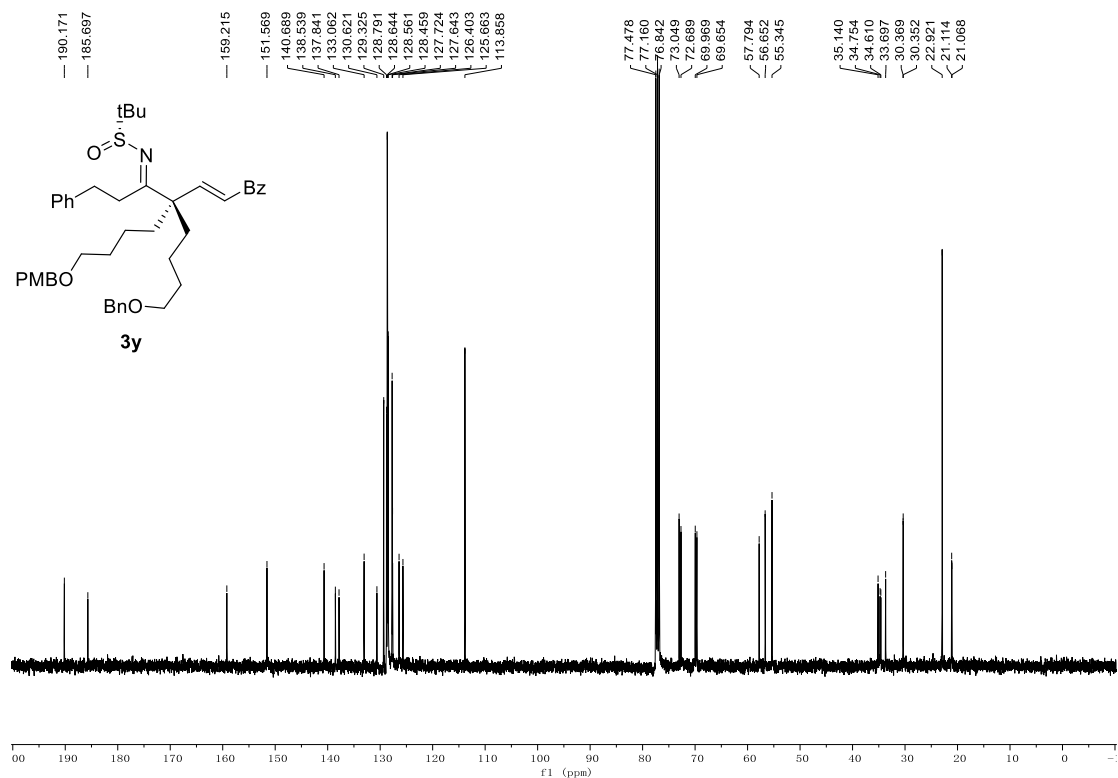

<sup>13</sup>C NMR spectrum (CDCl<sub>3</sub>, 100 MHz) of **3y**

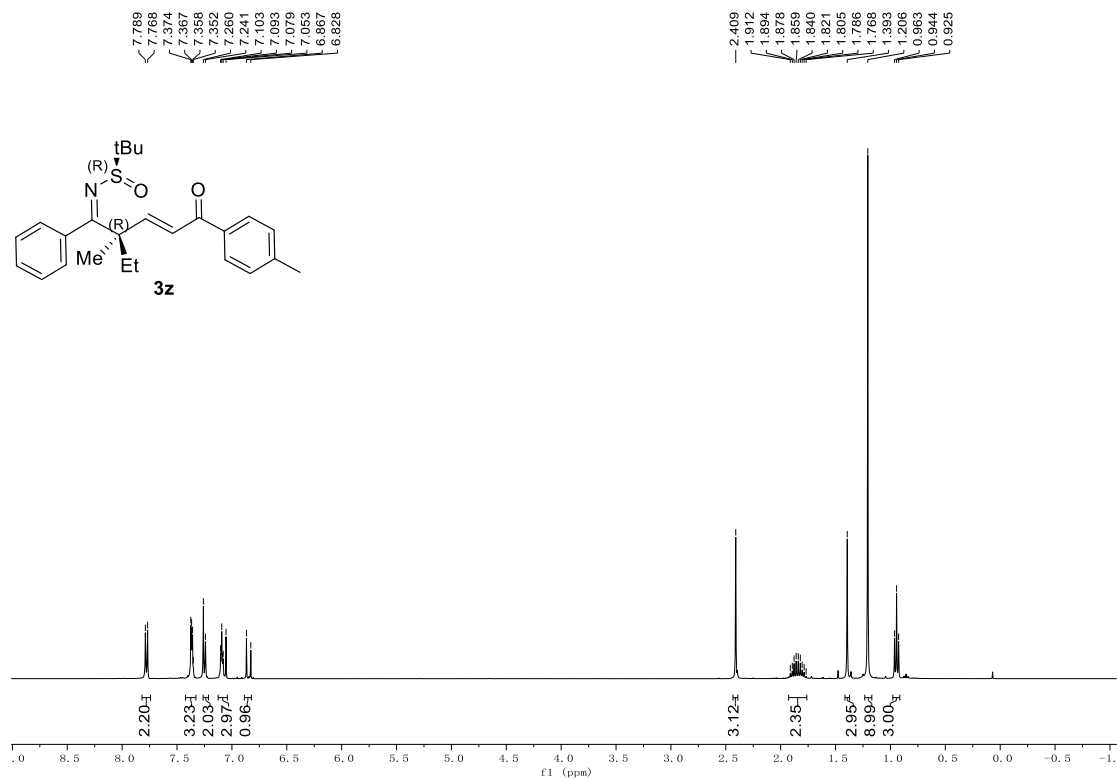

<sup>1</sup>H NMR spectrum (CDCl<sub>3</sub>, 400 MHz) of **3z**

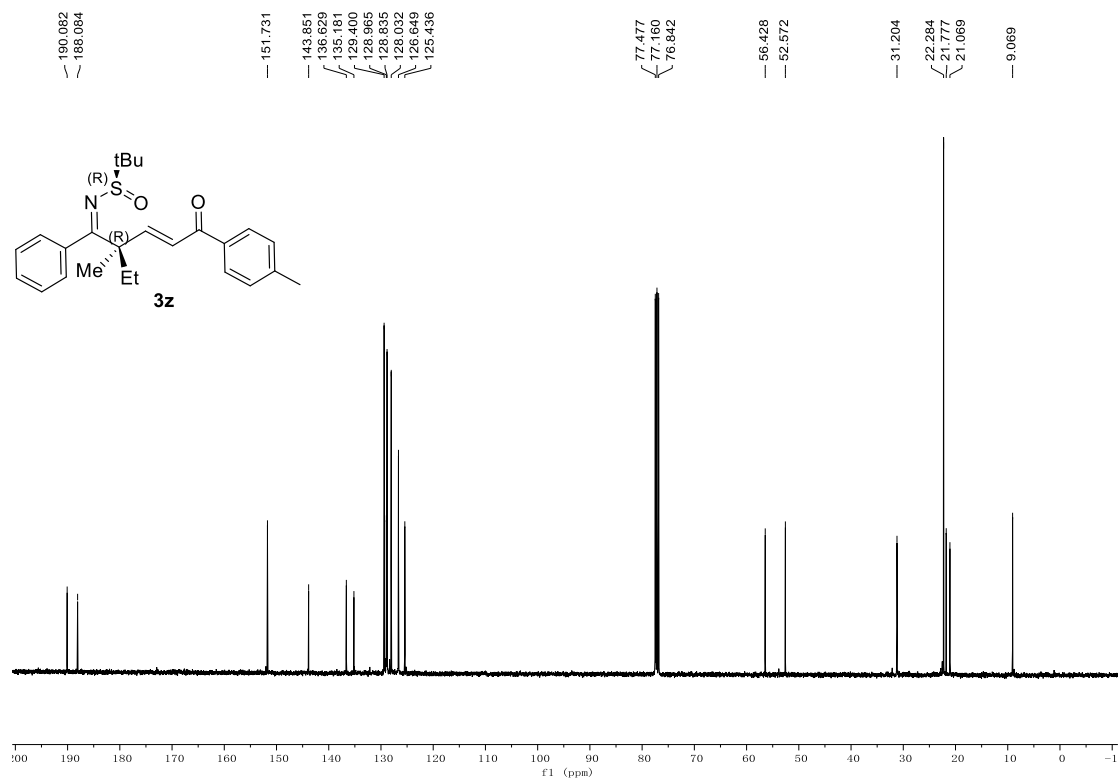

<sup>13</sup>C NMR spectrum (CDCl<sub>3</sub>, 100 MHz) of **3z**

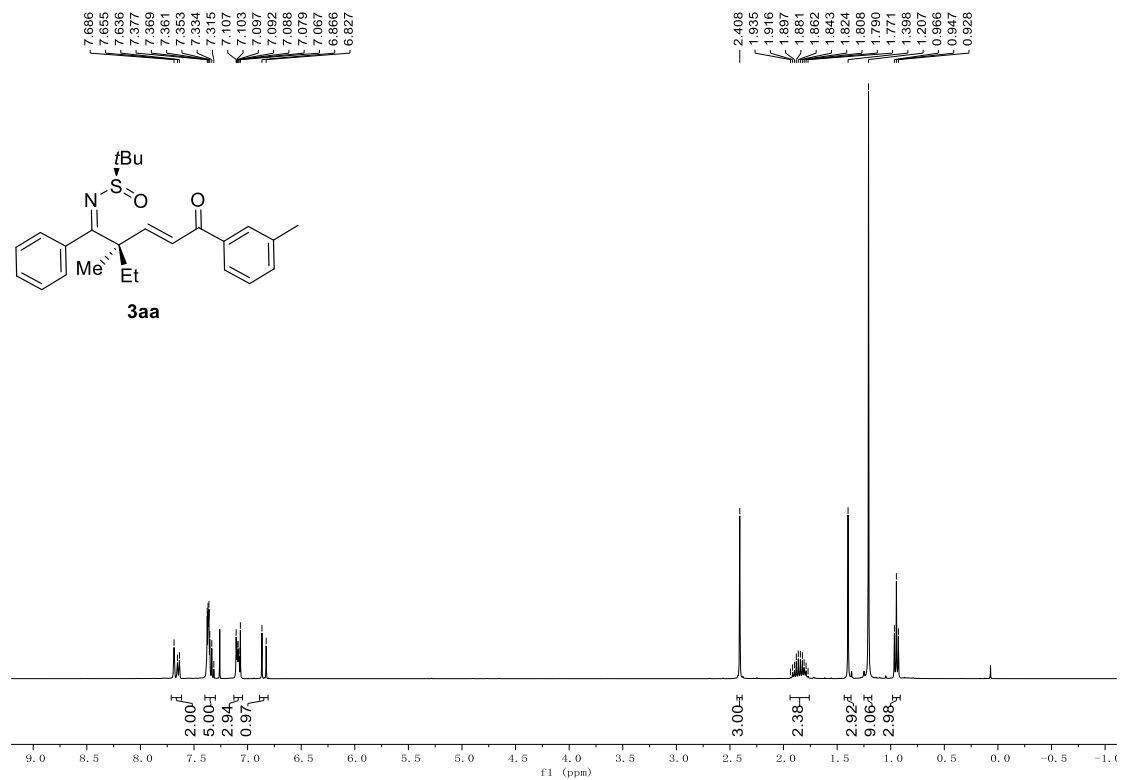

<sup>1</sup>H NMR spectrum (CDCl<sub>3</sub>, 400 MHz) of **3aa**

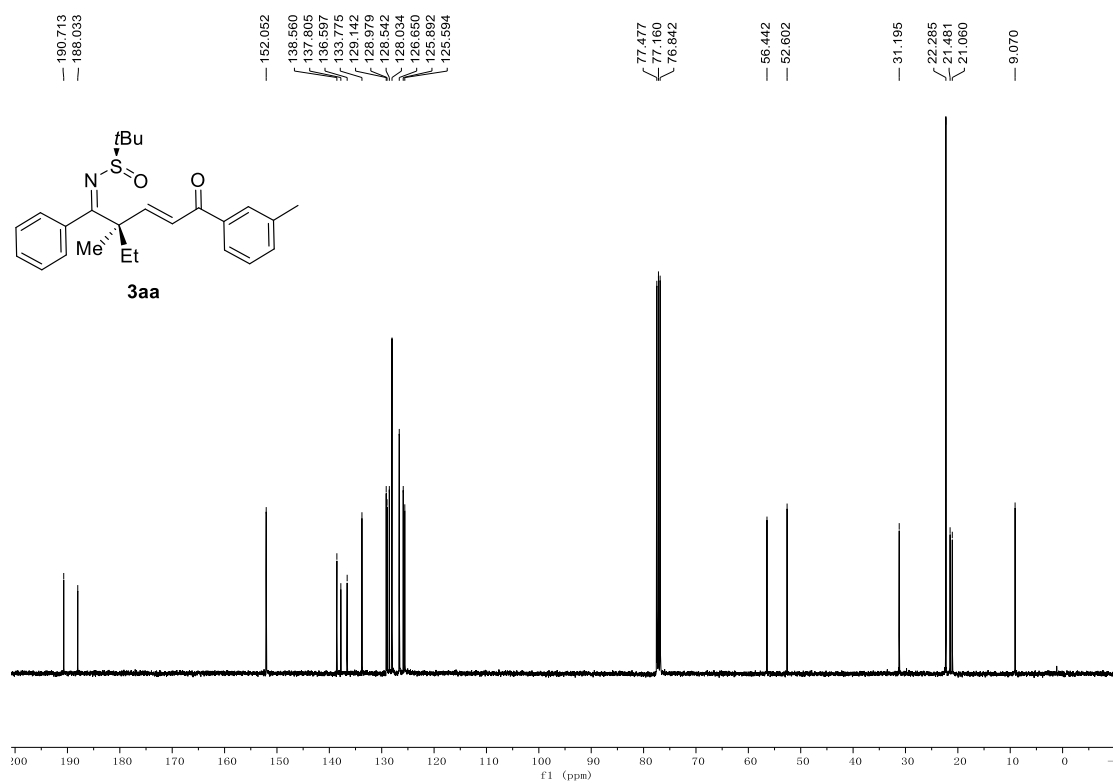

<sup>13</sup>C NMR spectrum (CDCl<sub>3</sub>, 100 MHz) of (*R*<sub>s</sub>, *2R*)-**3aa**

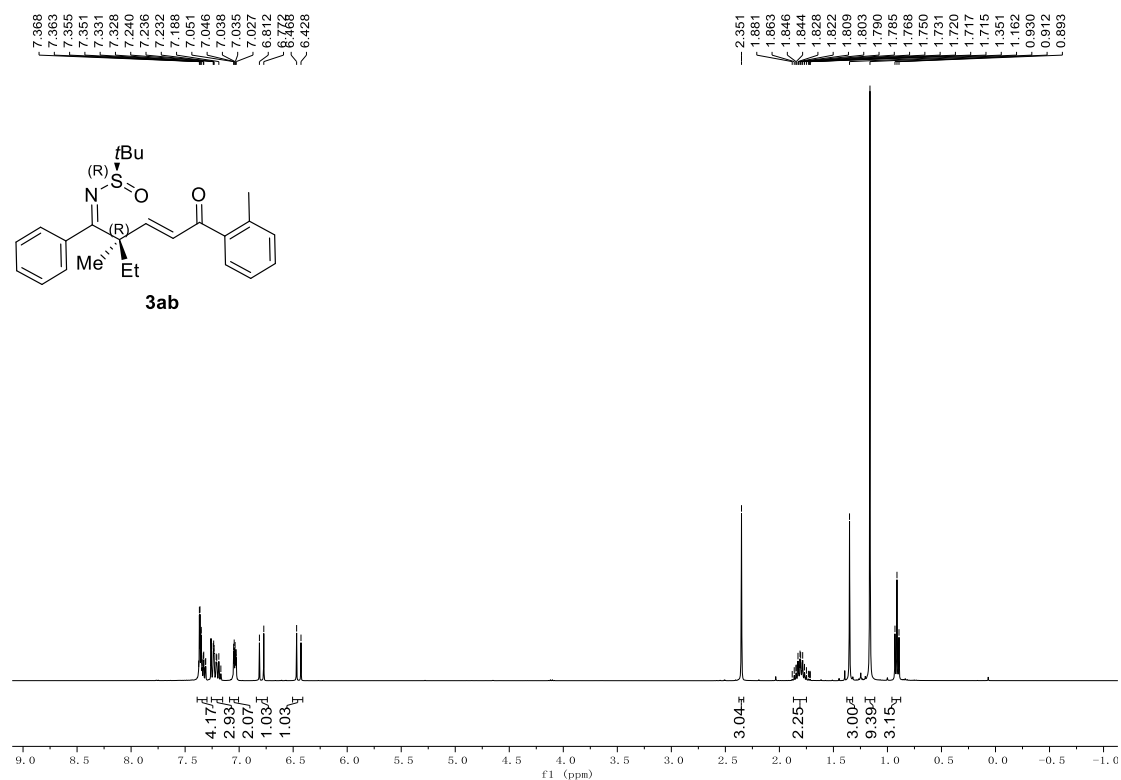

**<sup>1</sup>H NMR spectrum (CDCl<sub>3</sub>, 400 MHz) of **3ab****

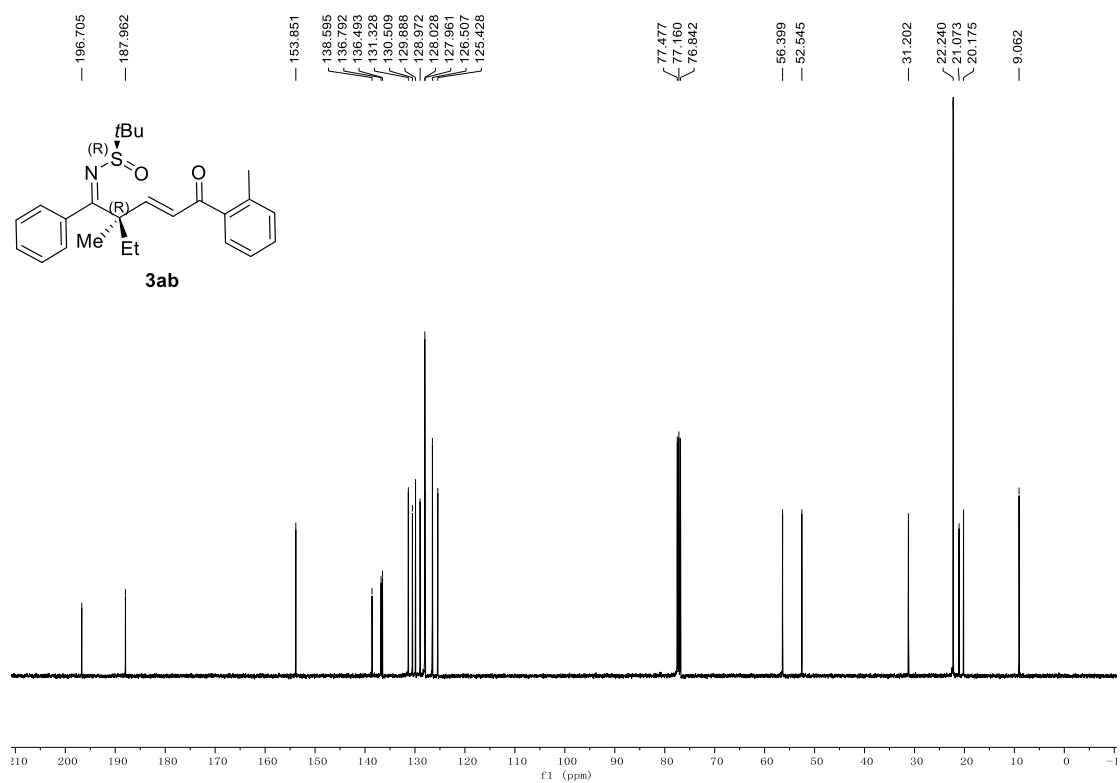

**<sup>13</sup>C NMR spectrum (CDCl<sub>3</sub>, 100 MHz) of **3ab****

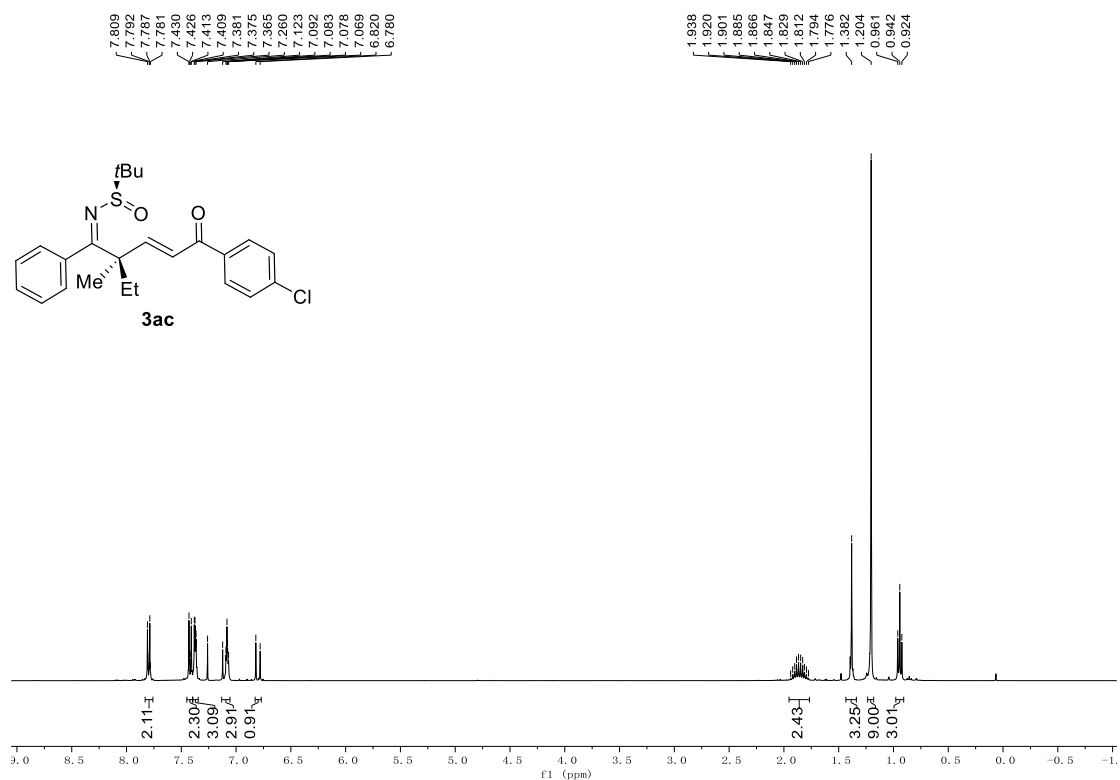

<sup>1</sup>H NMR spectrum (CDCl<sub>3</sub>, 400 MHz) of **3ac**

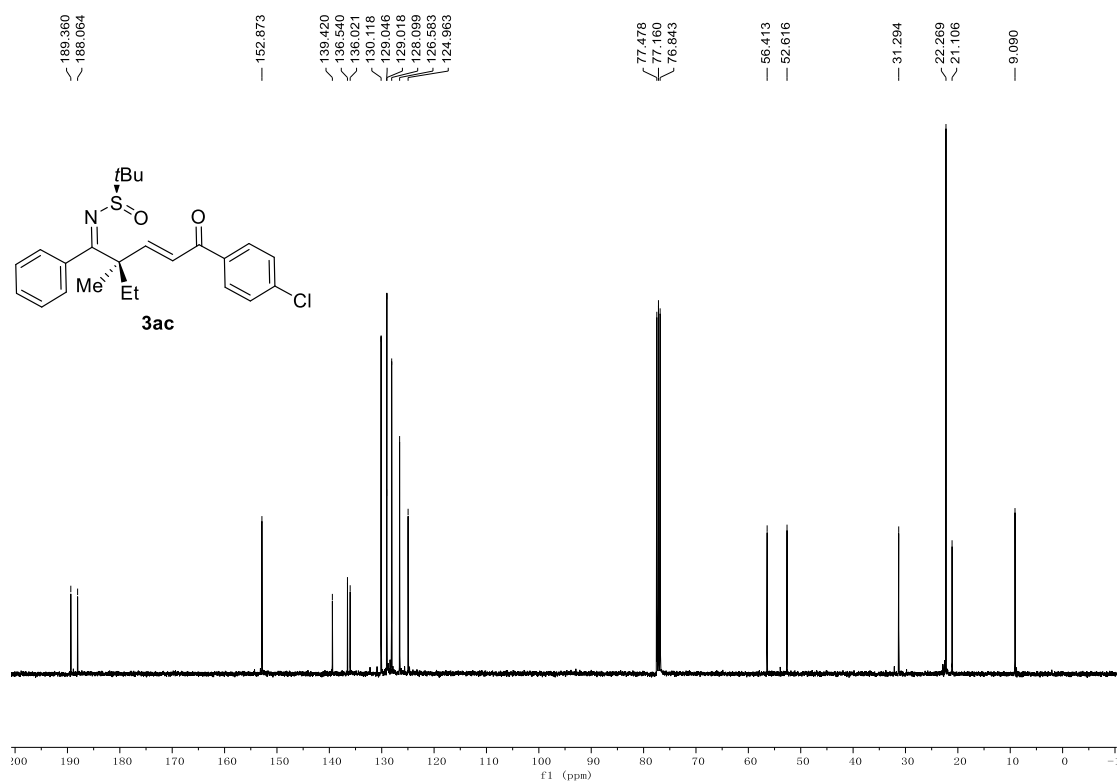

<sup>13</sup>C NMR spectrum (CDCl<sub>3</sub>, 100 MHz) of **3ac**

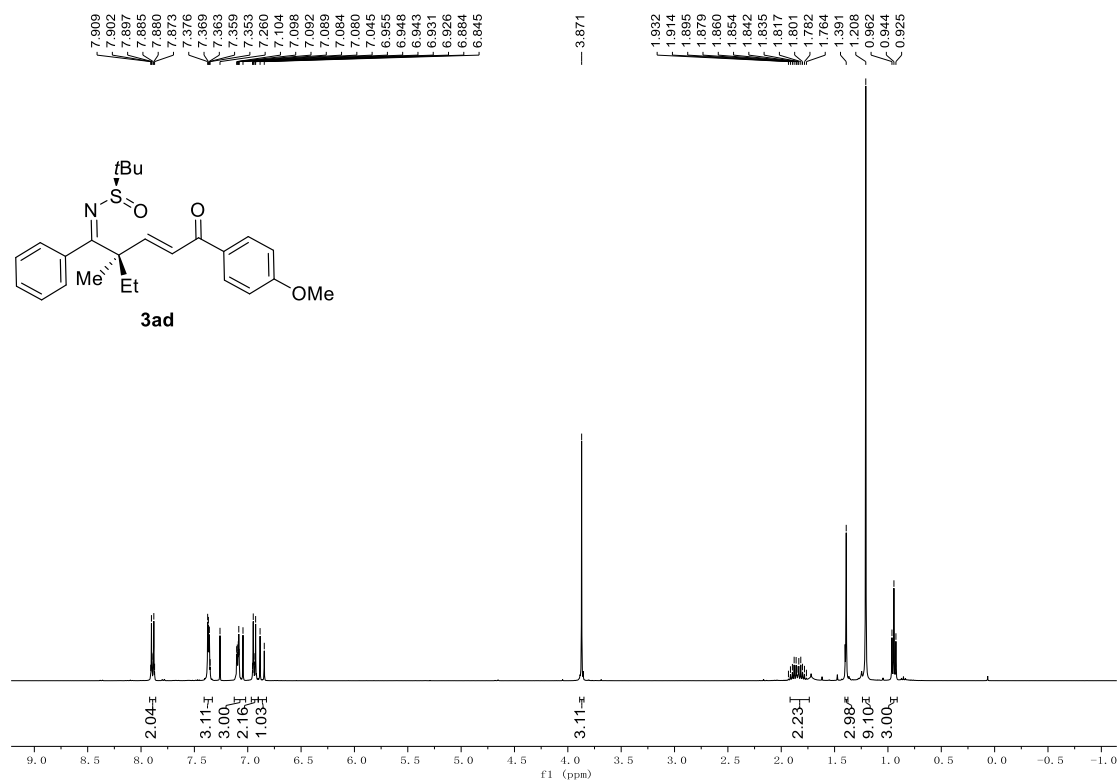

<sup>1</sup>H NMR spectrum (CDCl<sub>3</sub>, 400 MHz) of 3ad

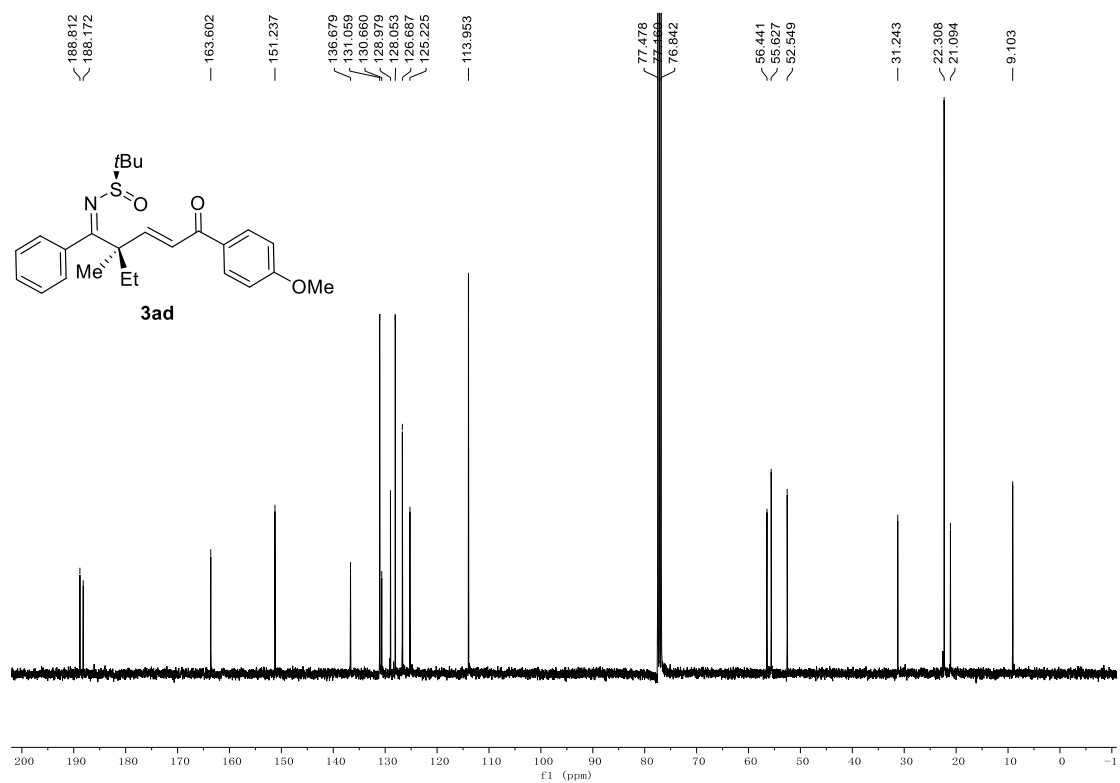

<sup>13</sup>C NMR spectrum (CDCl<sub>3</sub>, 100 MHz) of 3ad

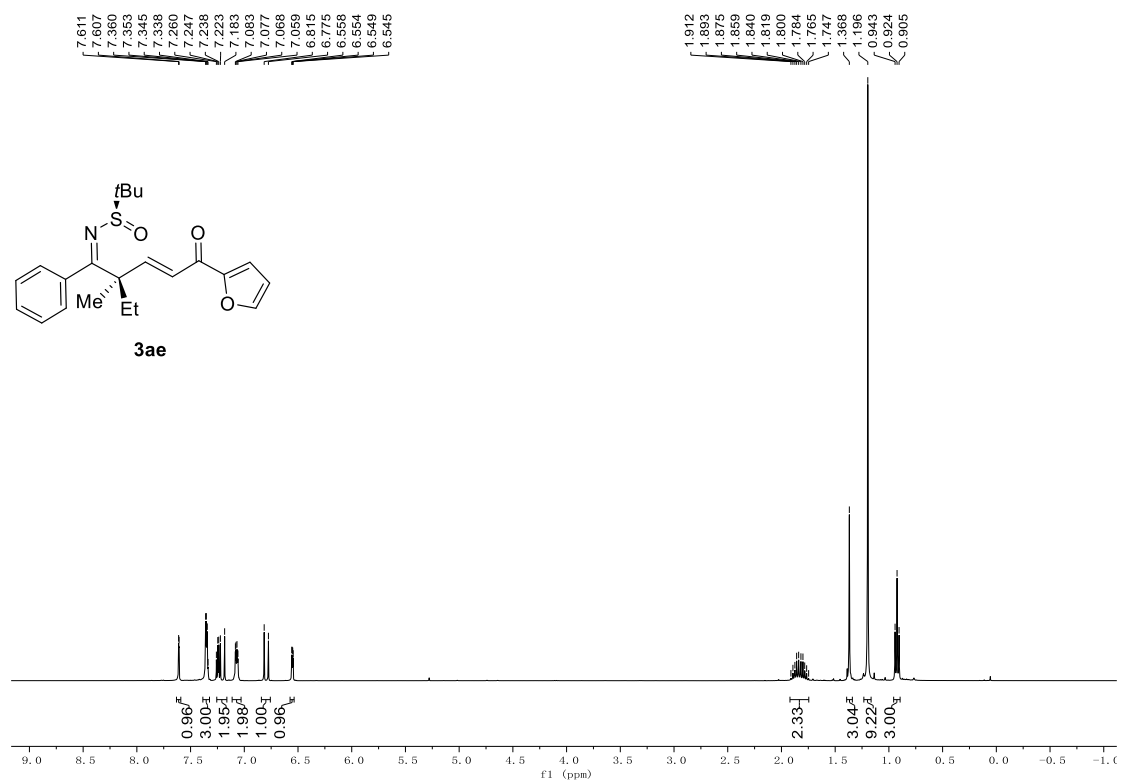

<sup>1</sup>H NMR spectrum (CDCl<sub>3</sub>, 400 MHz) of 3ae

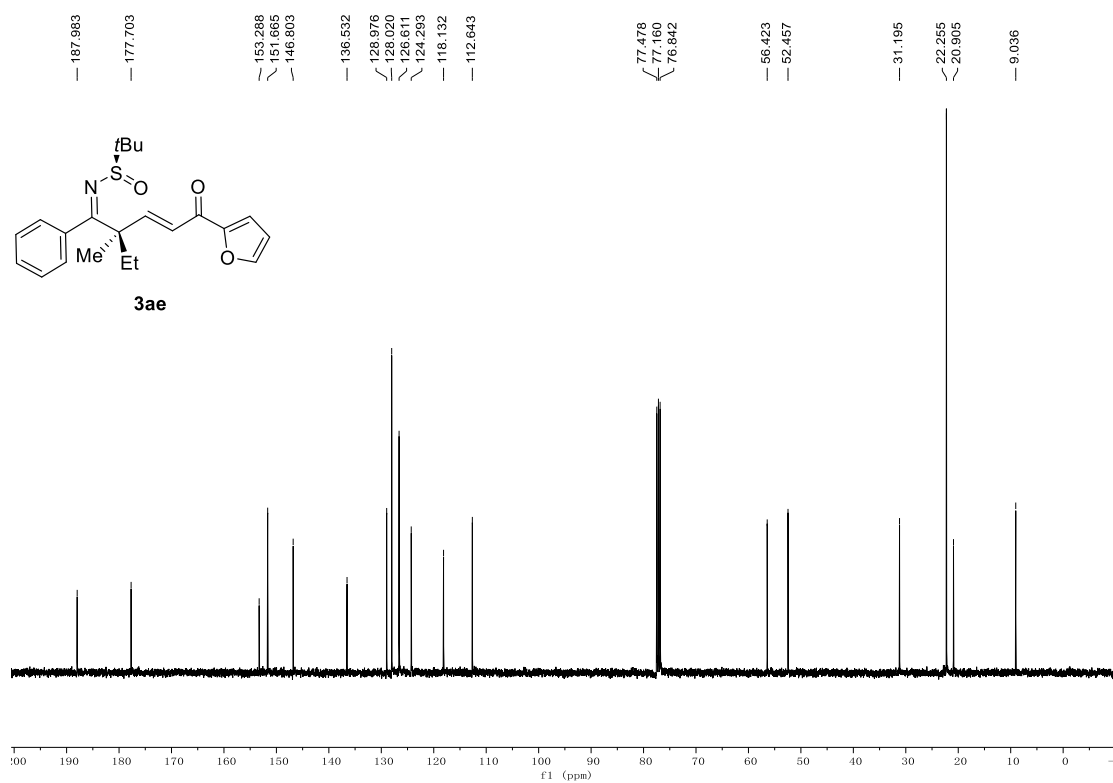

<sup>13</sup>C NMR spectrum (CDCl<sub>3</sub>, 100 MHz) of 3ae

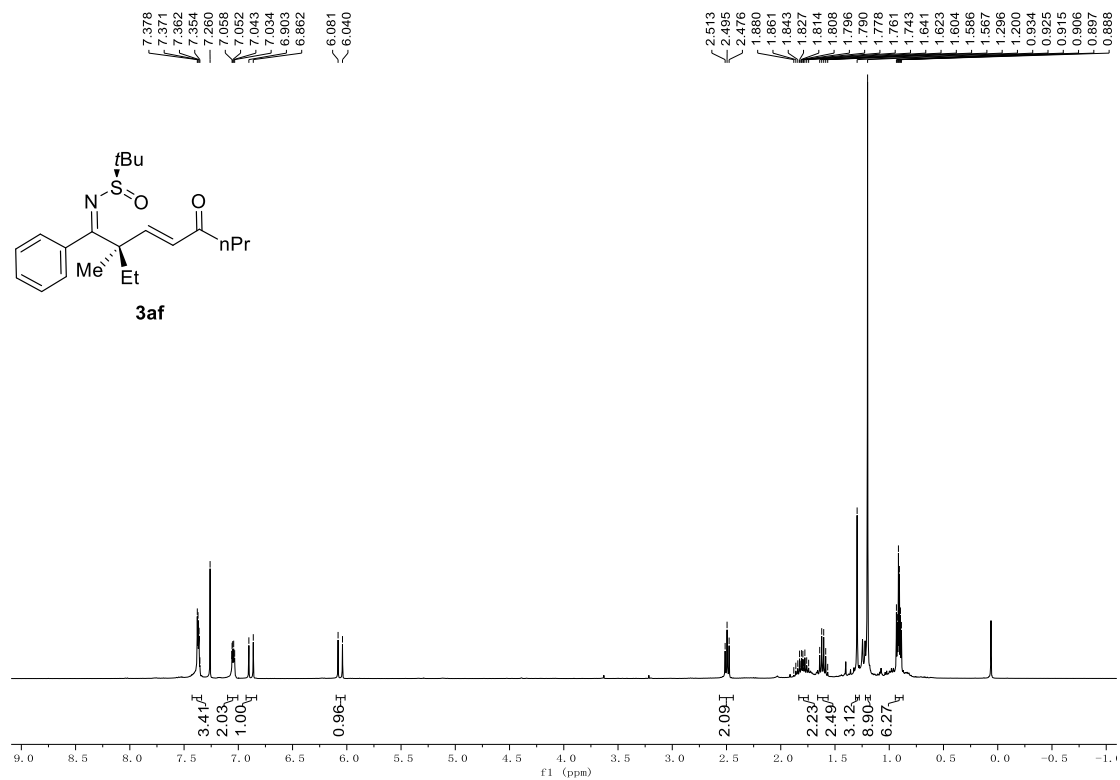

<sup>1</sup>H NMR spectrum (CDCl<sub>3</sub>, 400 MHz) of **3af**

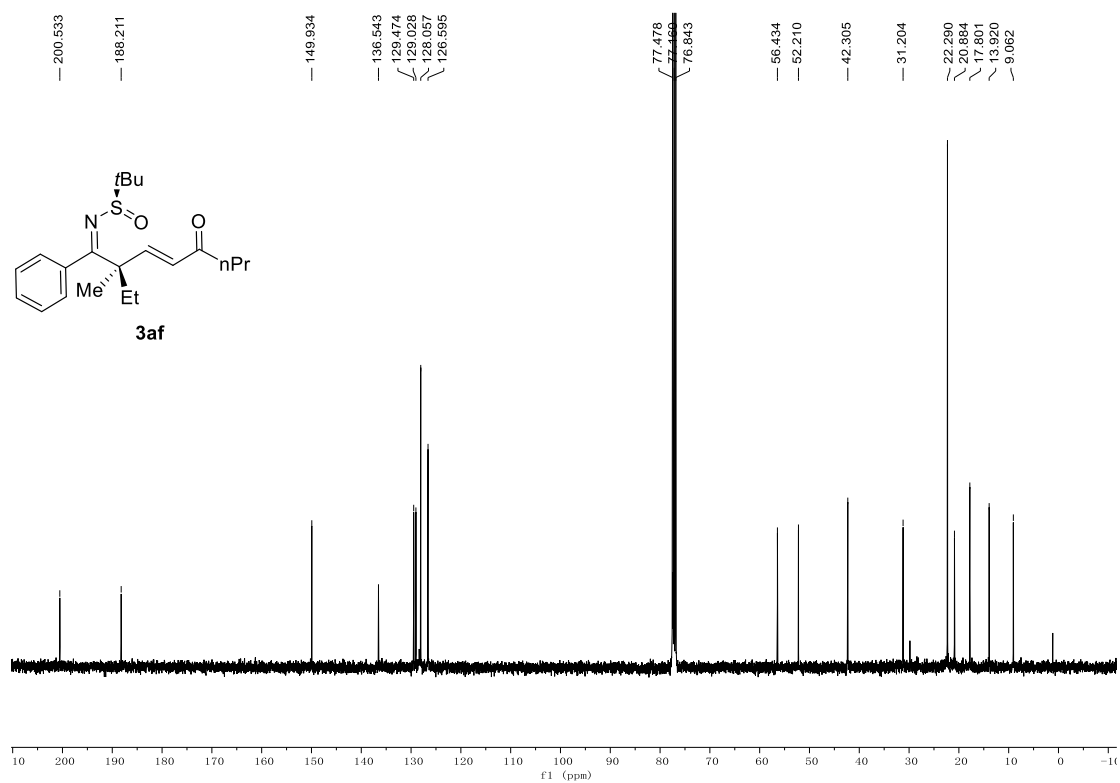

<sup>13</sup>C NMR spectrum (CDCl<sub>3</sub>, 100 MHz) of **3af**



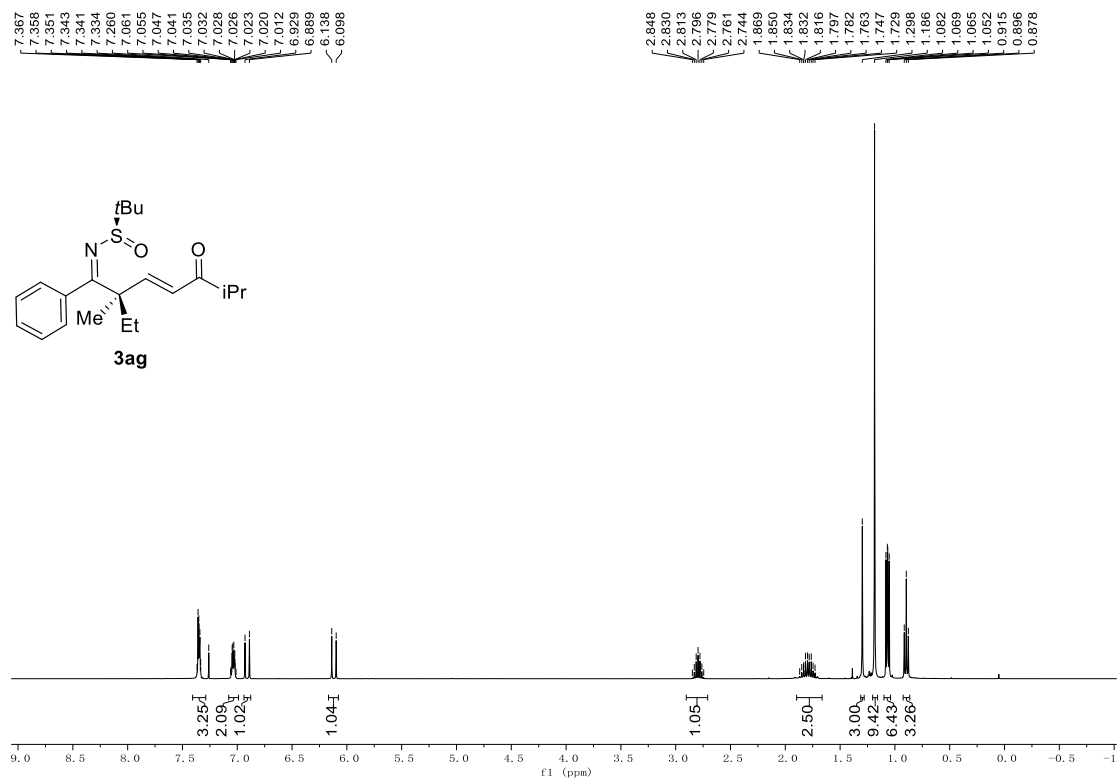

<sup>1</sup>H NMR spectrum (CDCl<sub>3</sub>, 400 MHz) of **3ag**

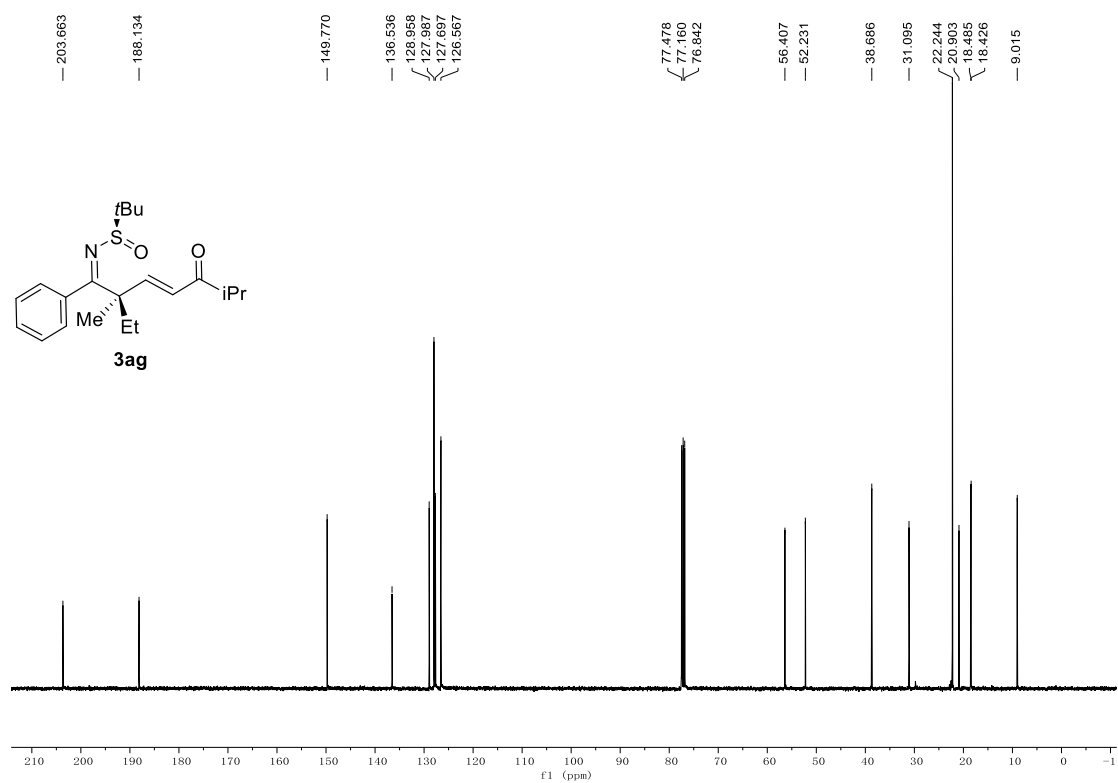

<sup>13</sup>C NMR spectrum (CDCl<sub>3</sub>, 100 MHz) of **3ag**

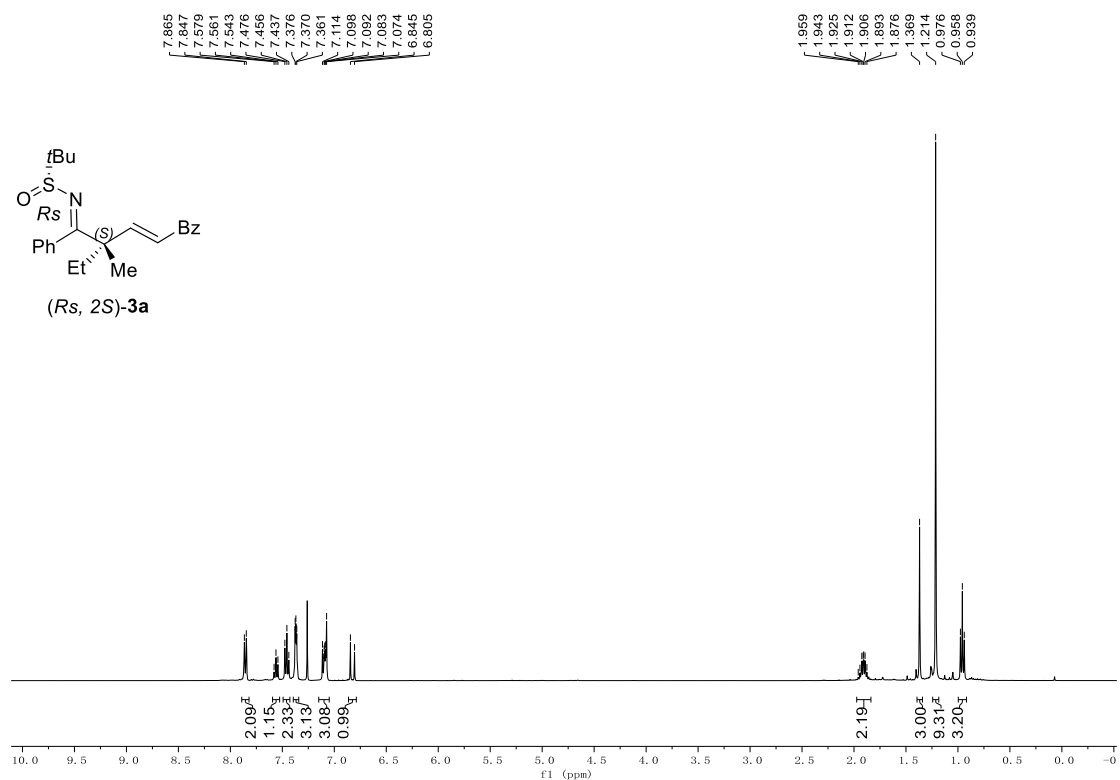

<sup>1</sup>H NMR spectrum (CDCl<sub>3</sub>, 400 MHz) of (*R<sub>s</sub>*, 2*S*)-**3a** prepared from α-alkenylation of enantioenriched ketimines (Scheme 5)

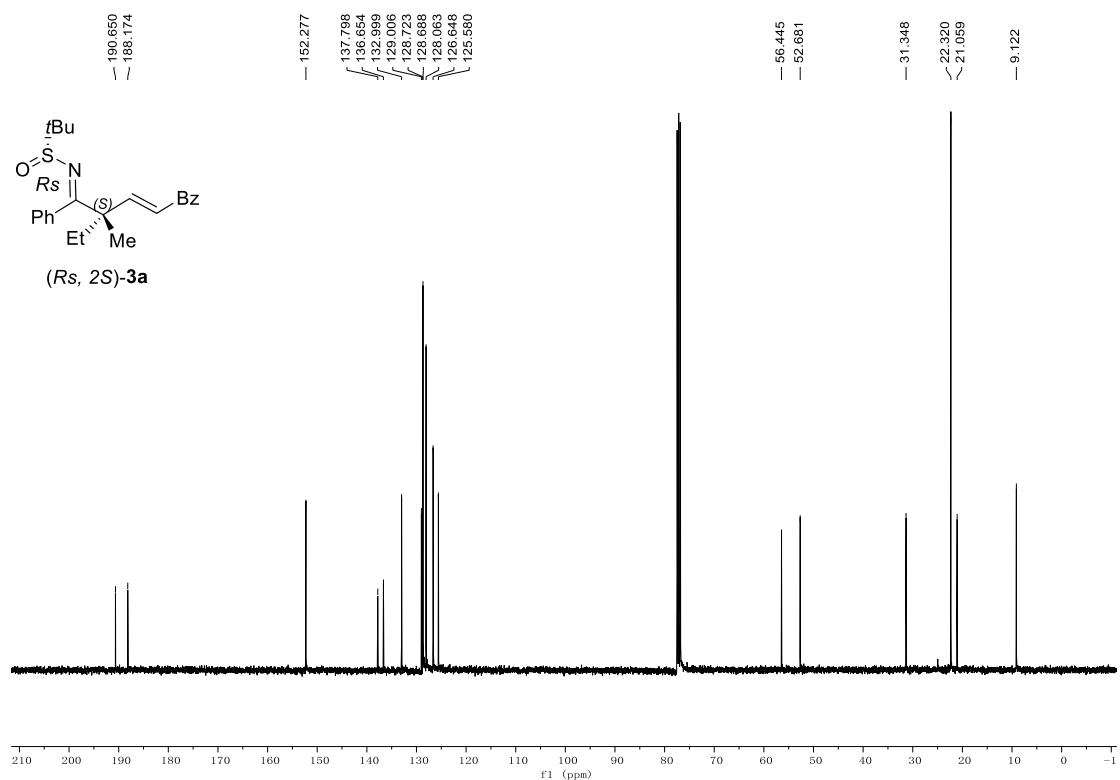

<sup>13</sup>C NMR spectrum (CDCl<sub>3</sub>, 100 MHz) of (*R<sub>s</sub>*, 2*S*)-**3a** prepared from α-alkenylation of enantioenriched ketimines (Scheme 5)

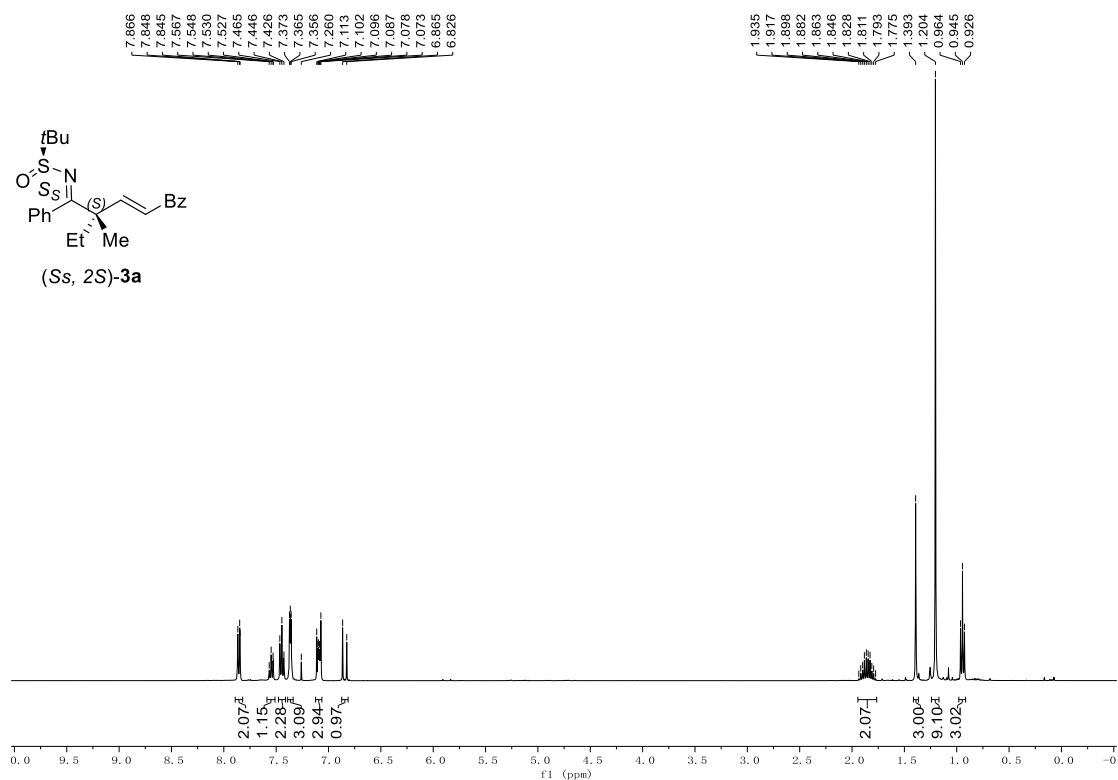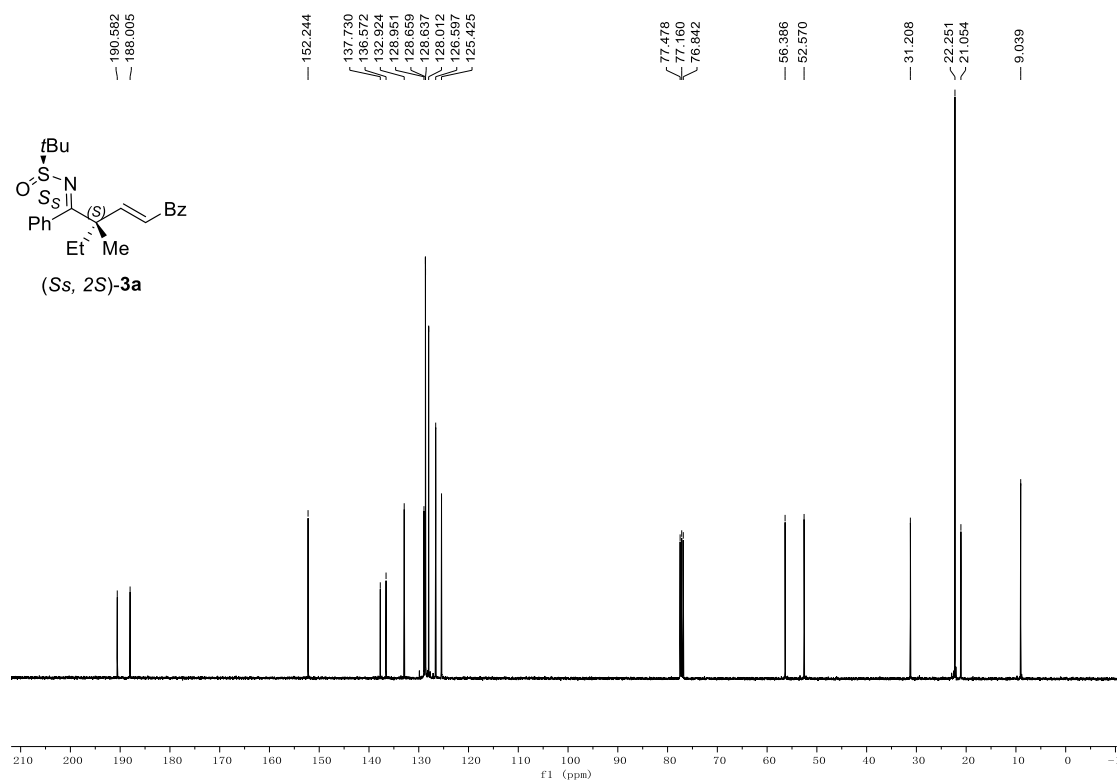

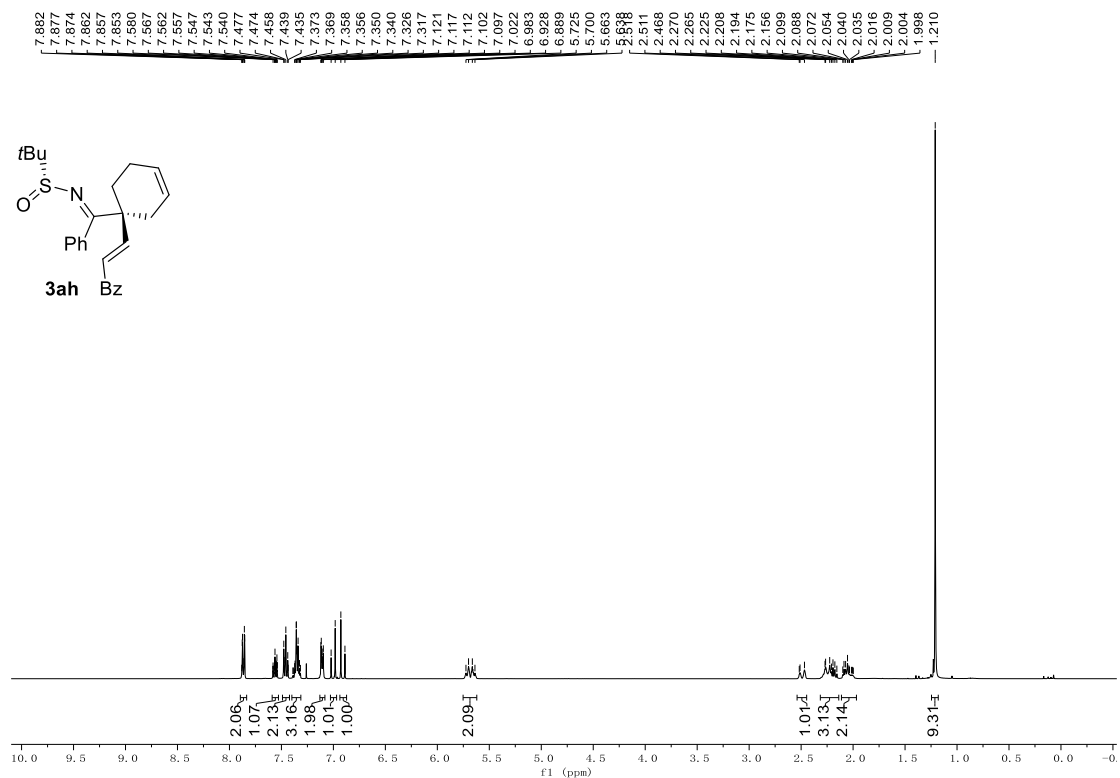

<sup>1</sup>H NMR spectrum (CDCl<sub>3</sub>, 400 MHz) of 3ah

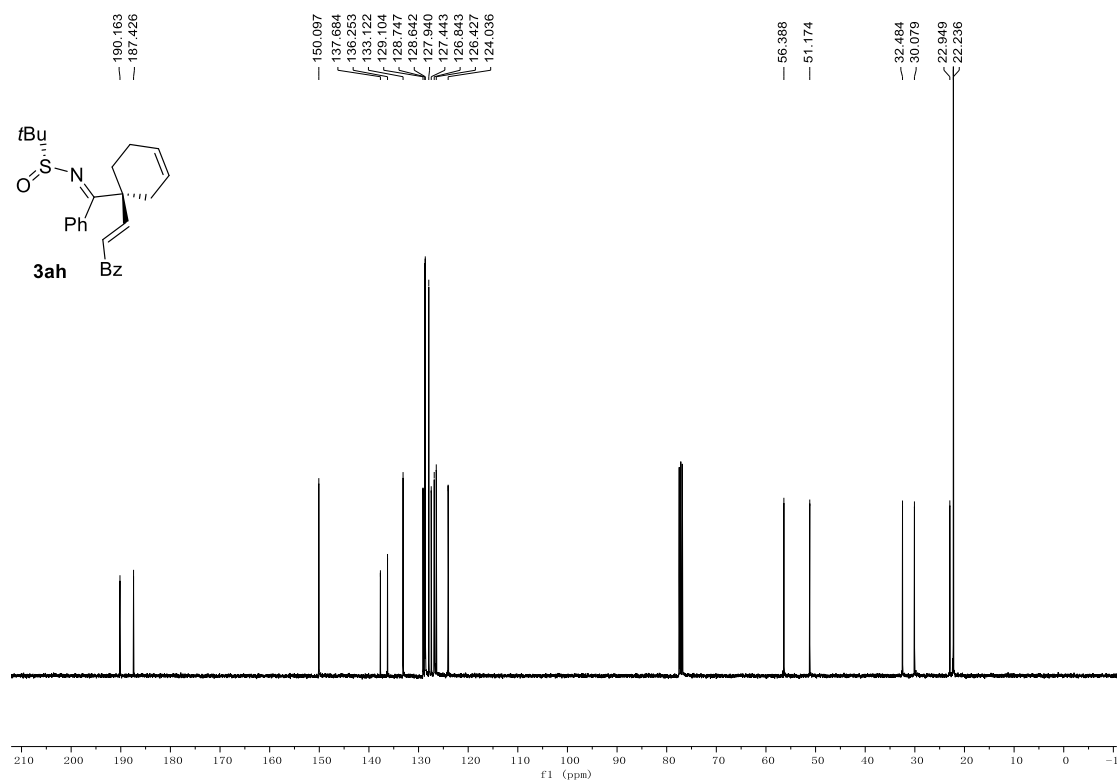

<sup>13</sup>C NMR spectrum (CDCl<sub>3</sub>, 100 MHz) of 3ah

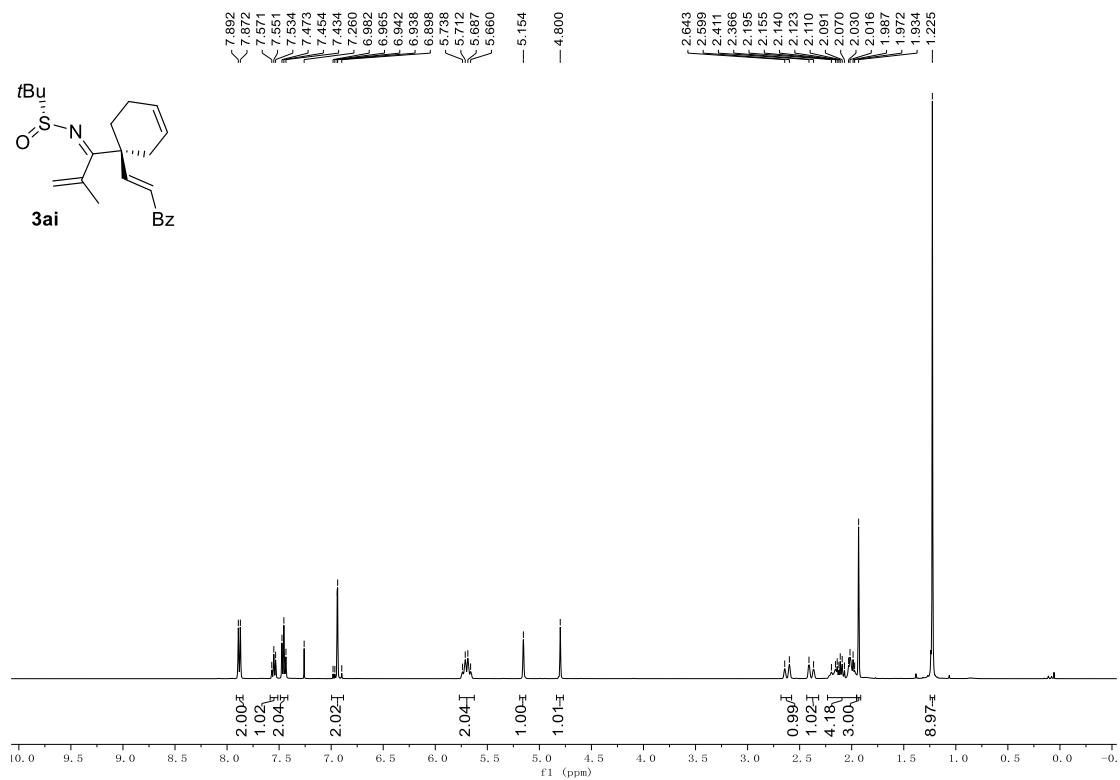

<sup>1</sup>H NMR spectrum (CDCl<sub>3</sub>, 400 MHz) of **3ai**

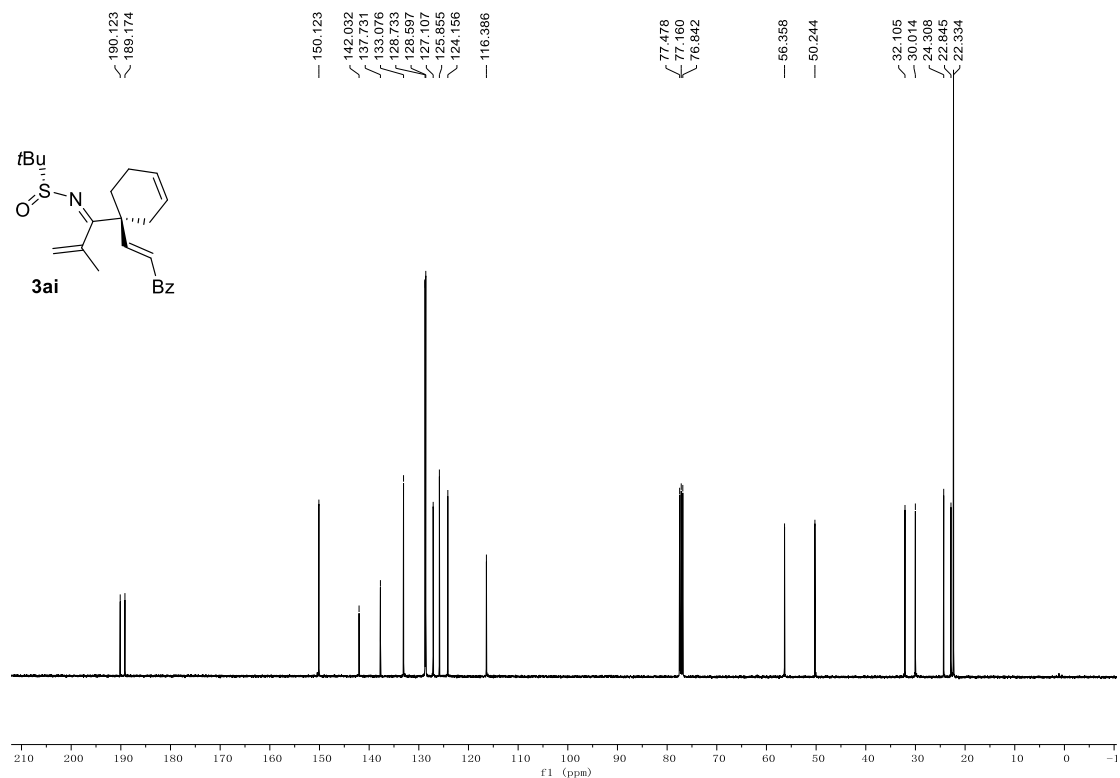

<sup>13</sup>C NMR spectrum (CDCl<sub>3</sub>, 100 MHz) of **3ai**

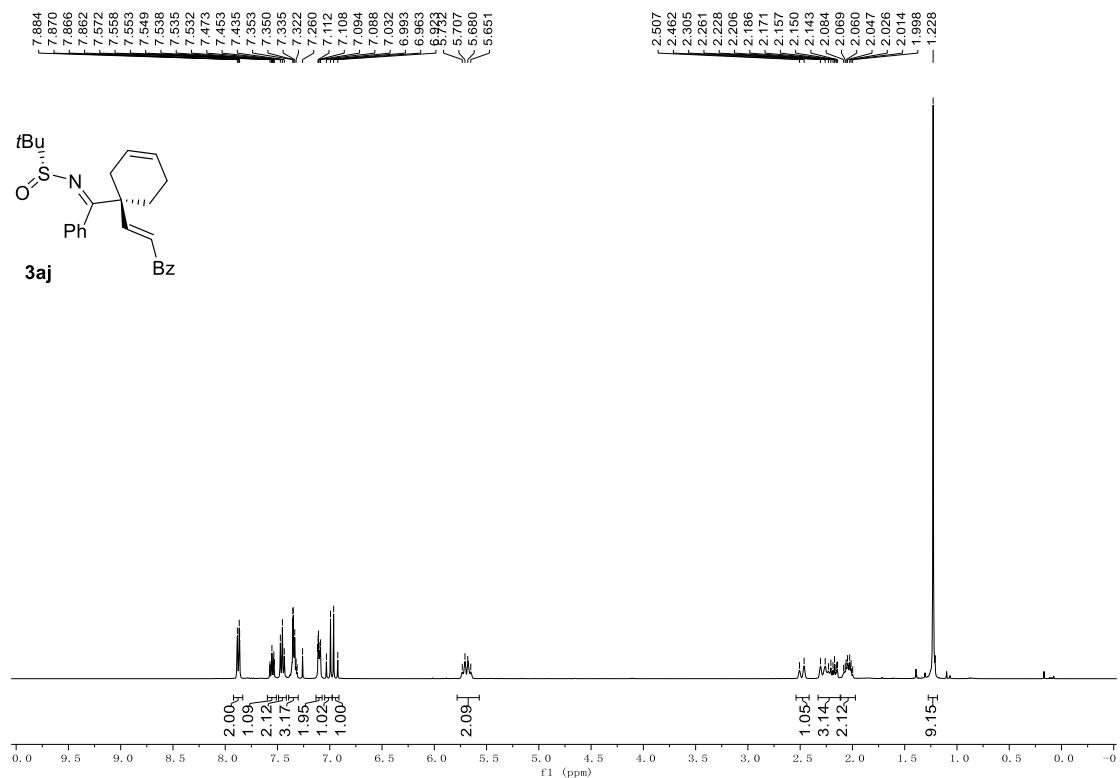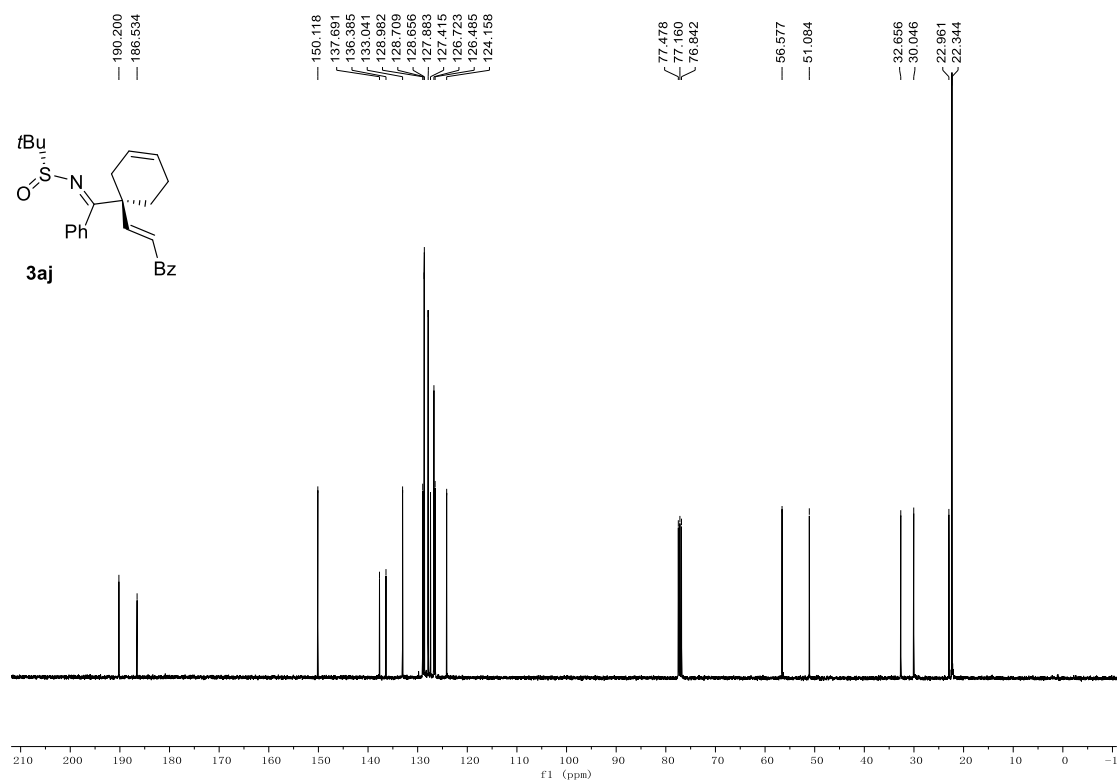

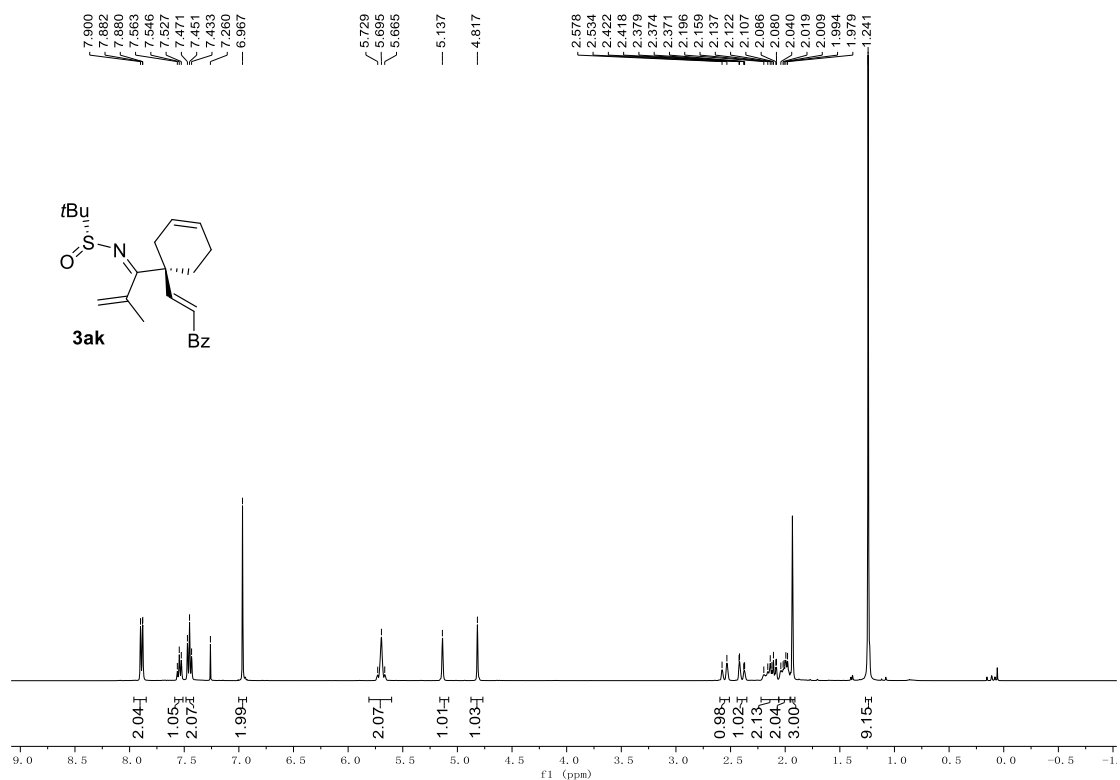

<sup>1</sup>H NMR spectrum (CDCl<sub>3</sub>, 400 MHz) of **3ak**

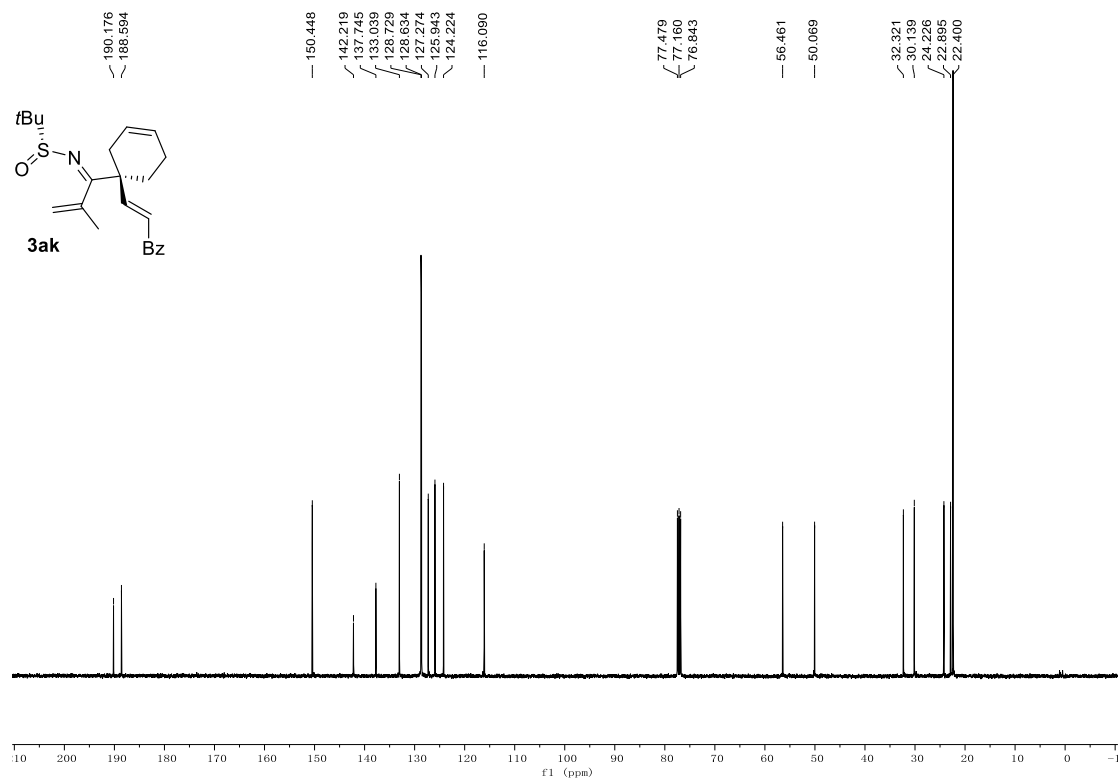

<sup>13</sup>C NMR spectrum (CDCl<sub>3</sub>, 100 MHz) of (R<sub>s</sub>, 2S)-**3ak**

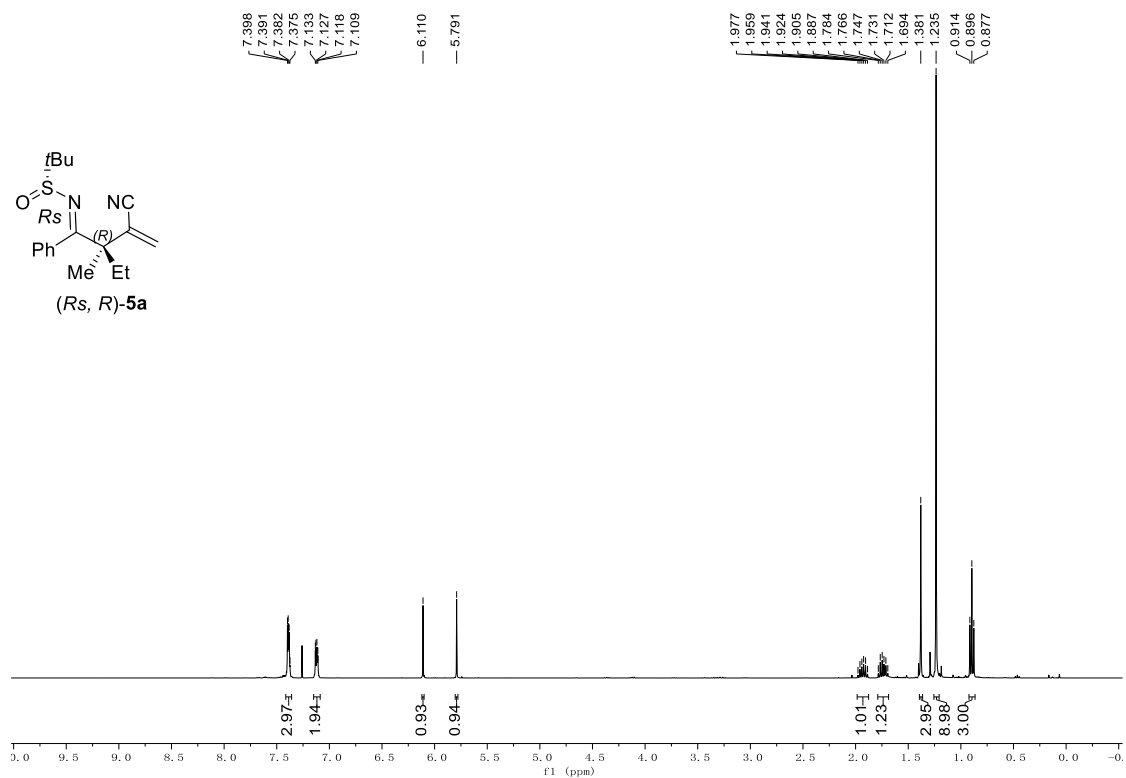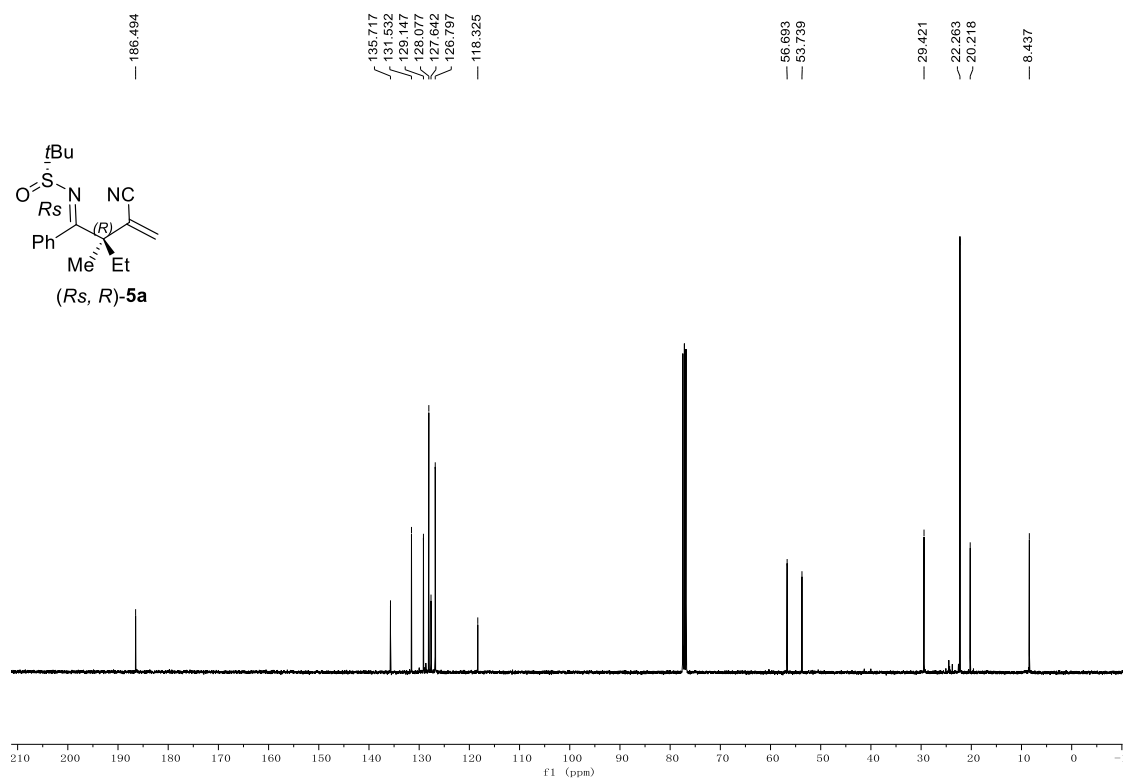



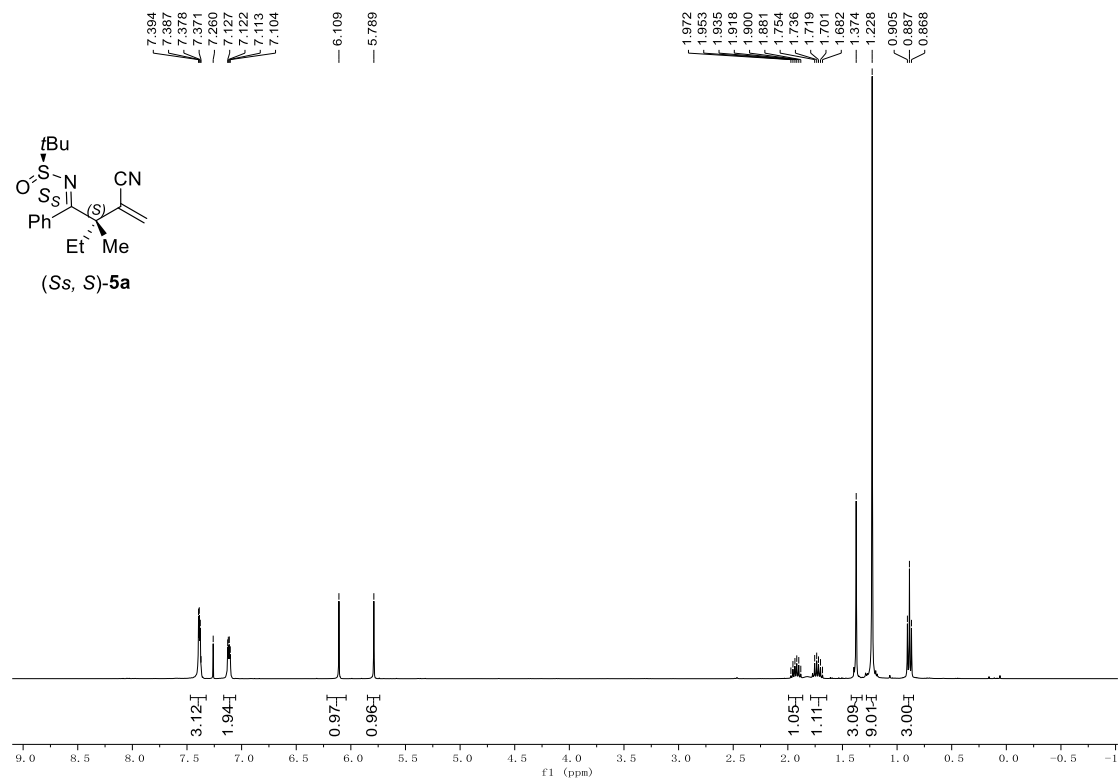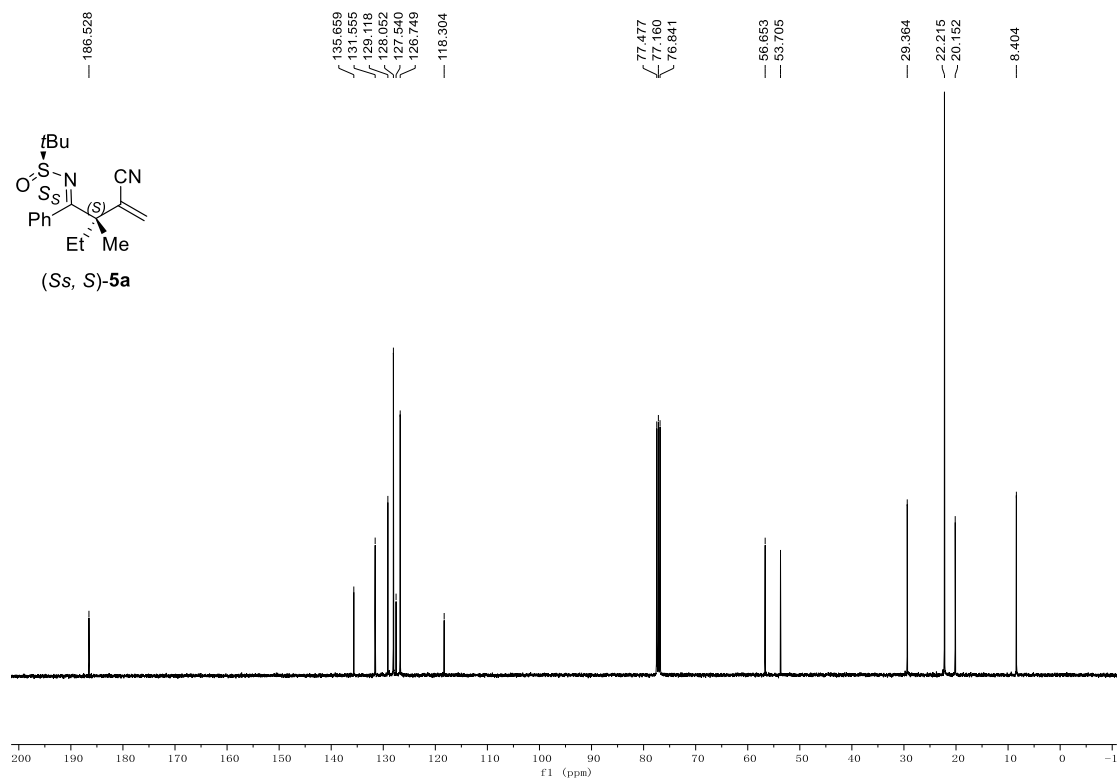

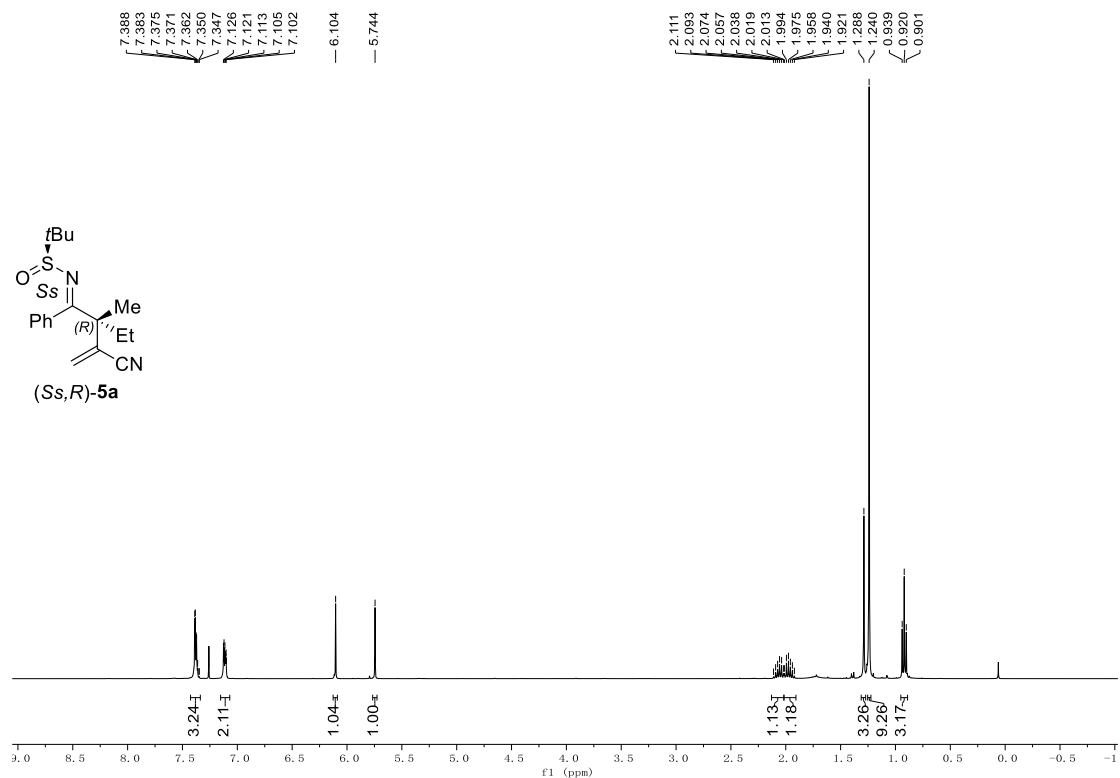

**<sup>1</sup>H NMR spectrum (CDCl<sub>3</sub>, 400 MHz) of (*Ss*, *R*)-**5a****

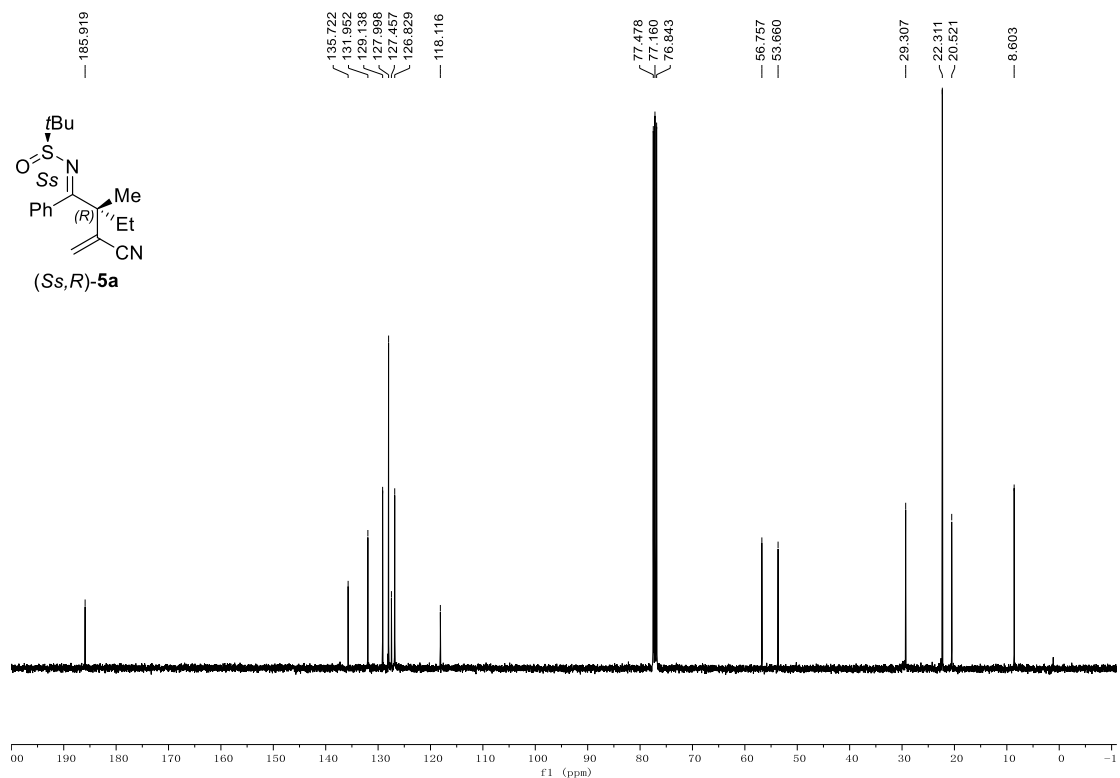

**<sup>13</sup>C NMR spectrum (CDCl<sub>3</sub>, 100 MHz) of (*Ss*, *R*)-**5a****

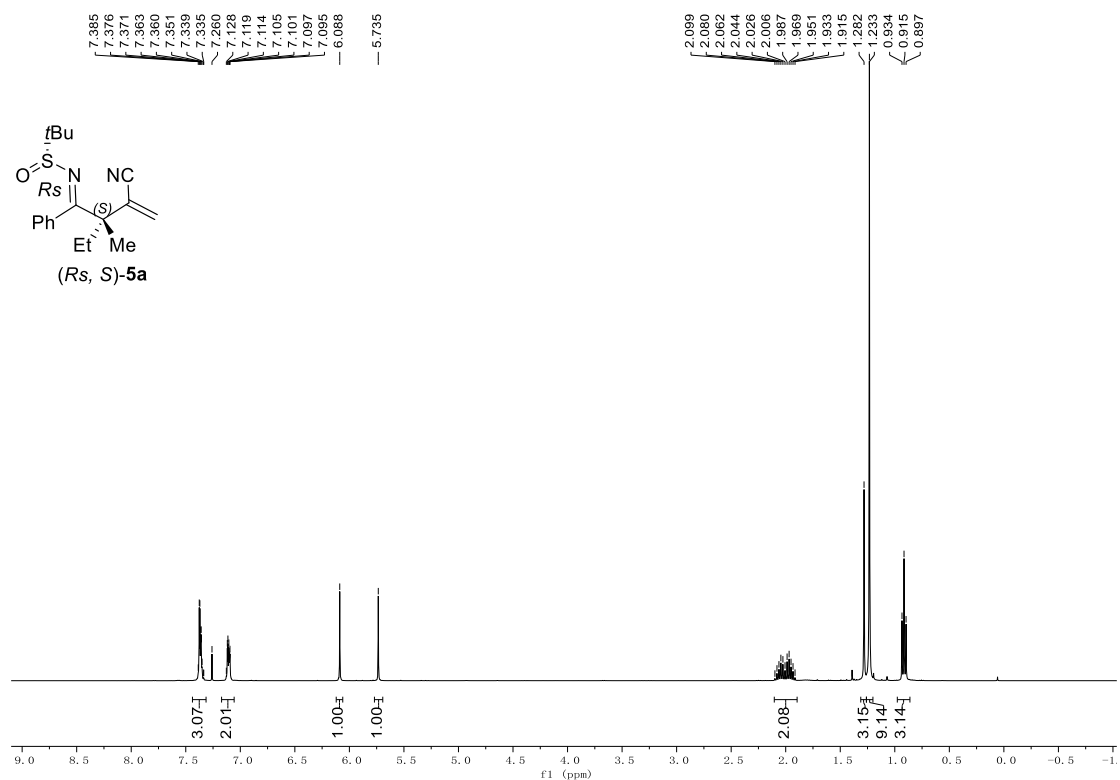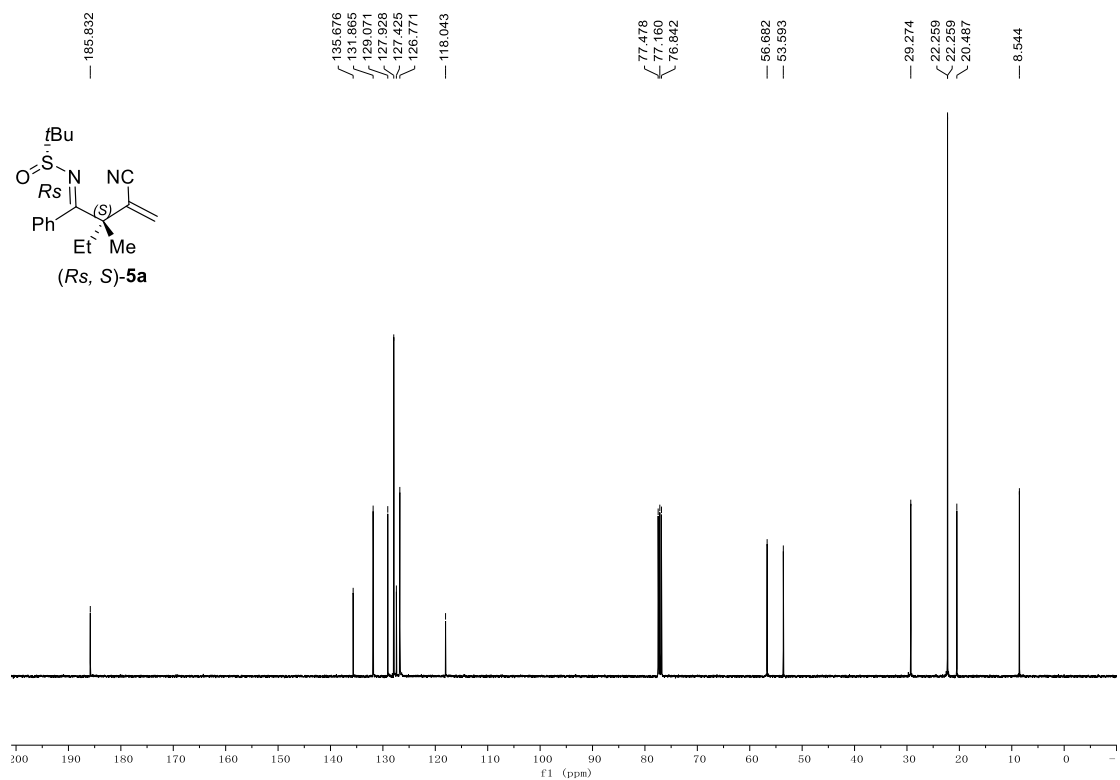

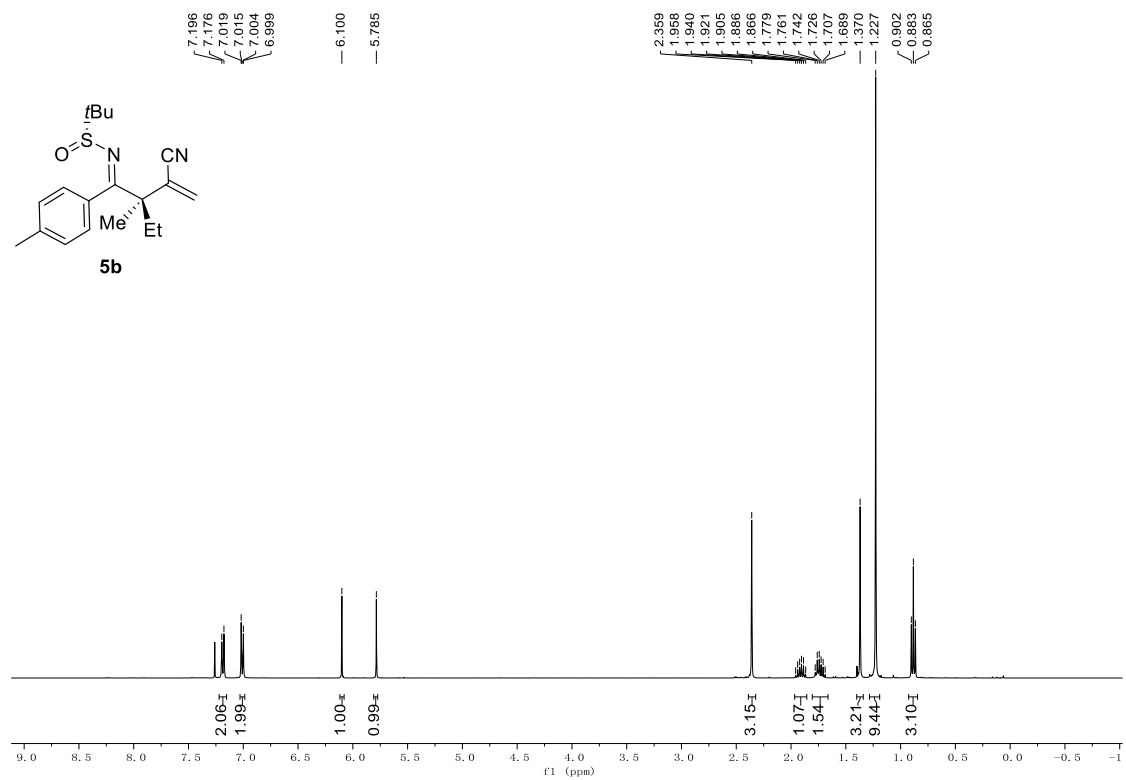

<sup>1</sup>H NMR spectrum (CDCl<sub>3</sub>, 400 MHz) of **5b**

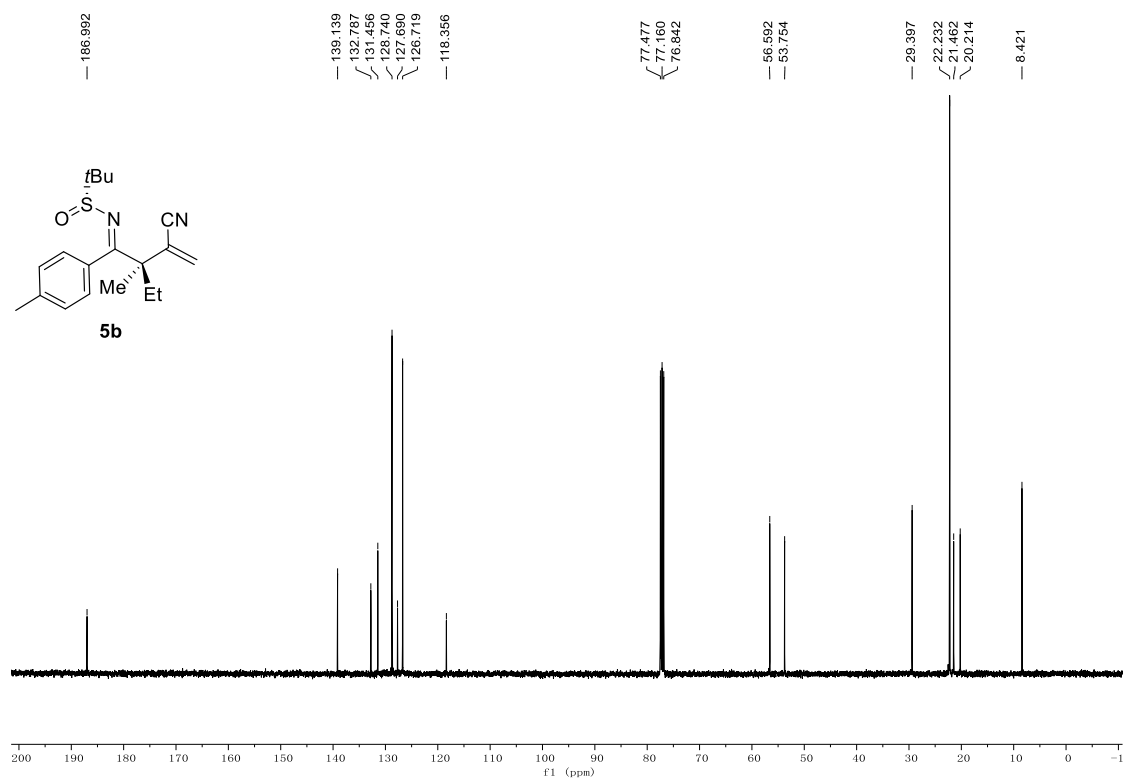

<sup>13</sup>C NMR spectrum (CDCl<sub>3</sub>, 100 MHz) of **5b**

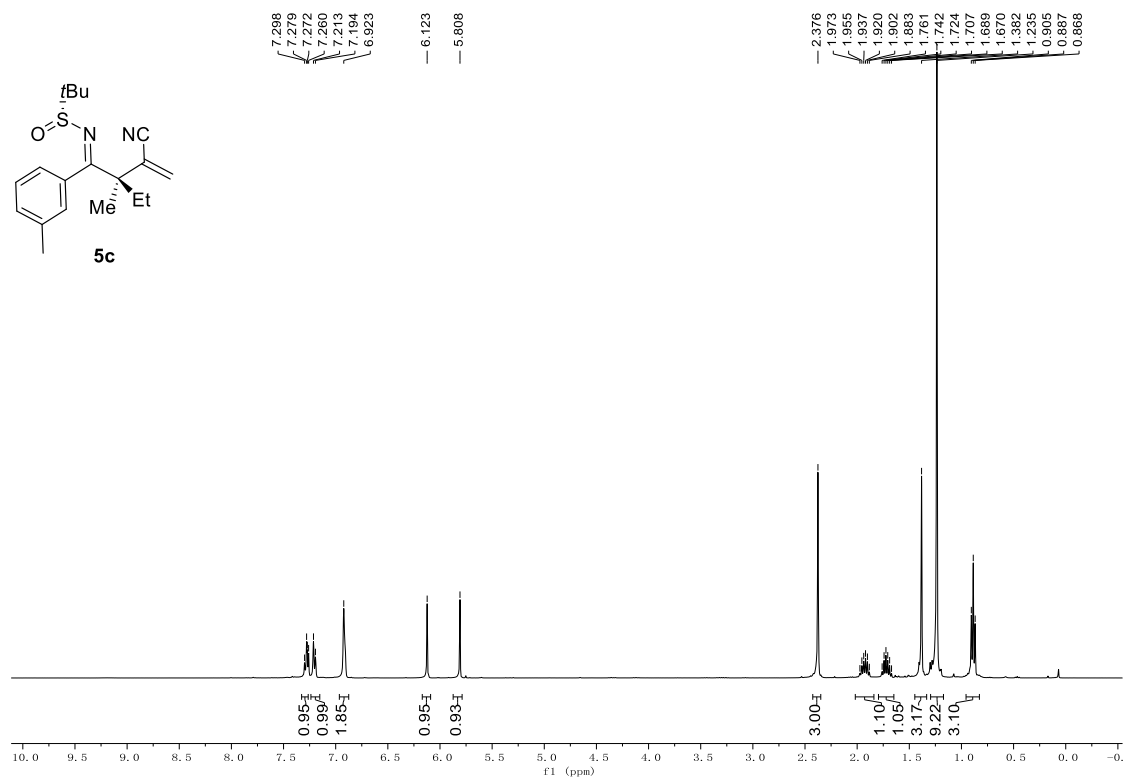

**<sup>1</sup>H NMR spectrum (CDCl<sub>3</sub>, 400 MHz) of 5c**

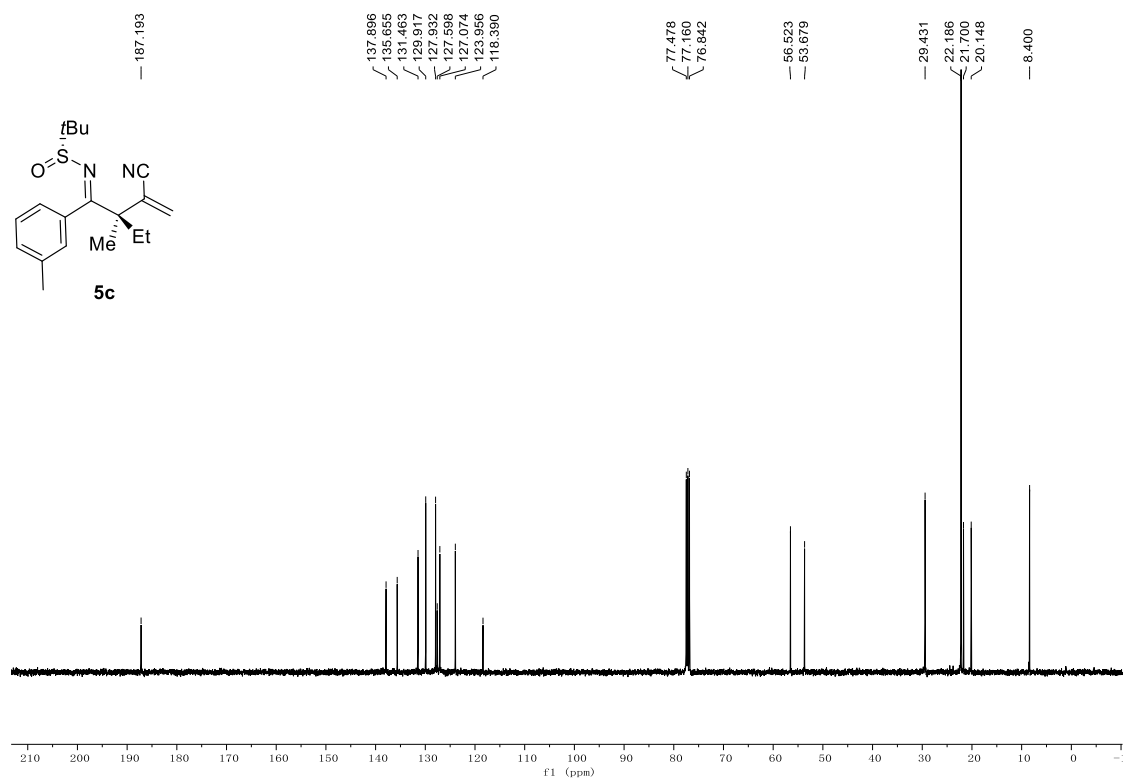

**<sup>13</sup>C NMR spectrum (CDCl<sub>3</sub>, 100 MHz) of 5c**

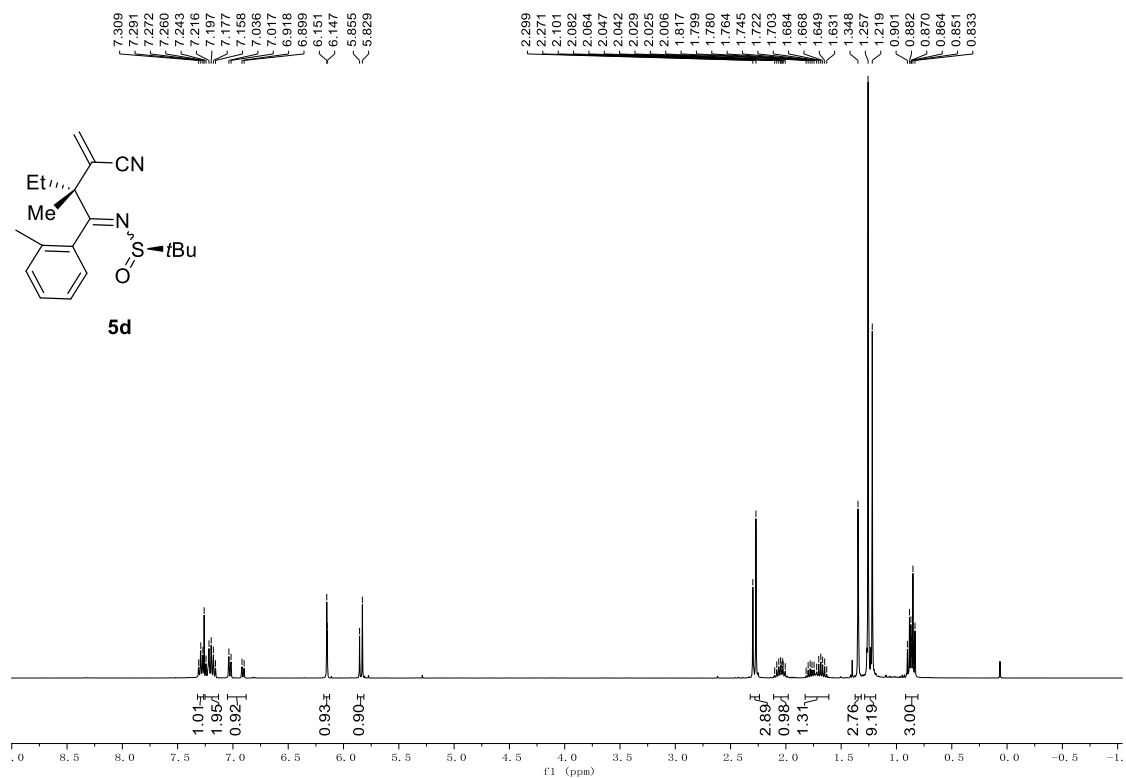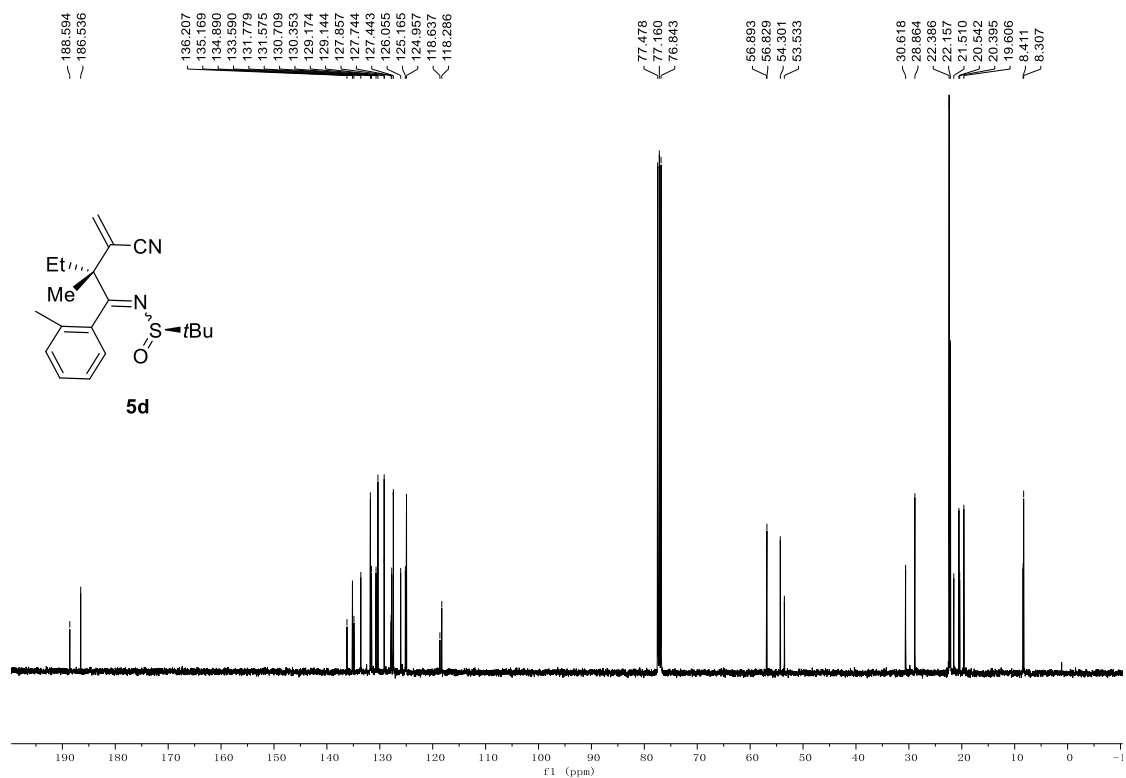

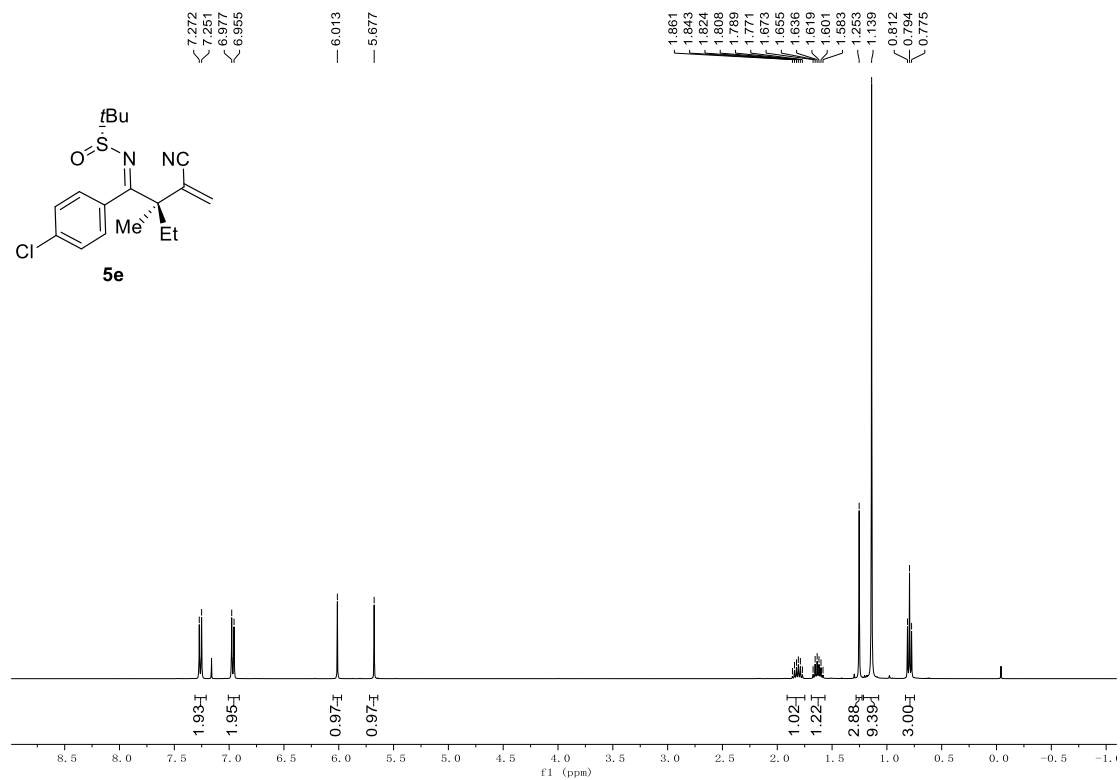

<sup>1</sup>H NMR spectrum (CDCl<sub>3</sub>, 400 MHz) of 5e

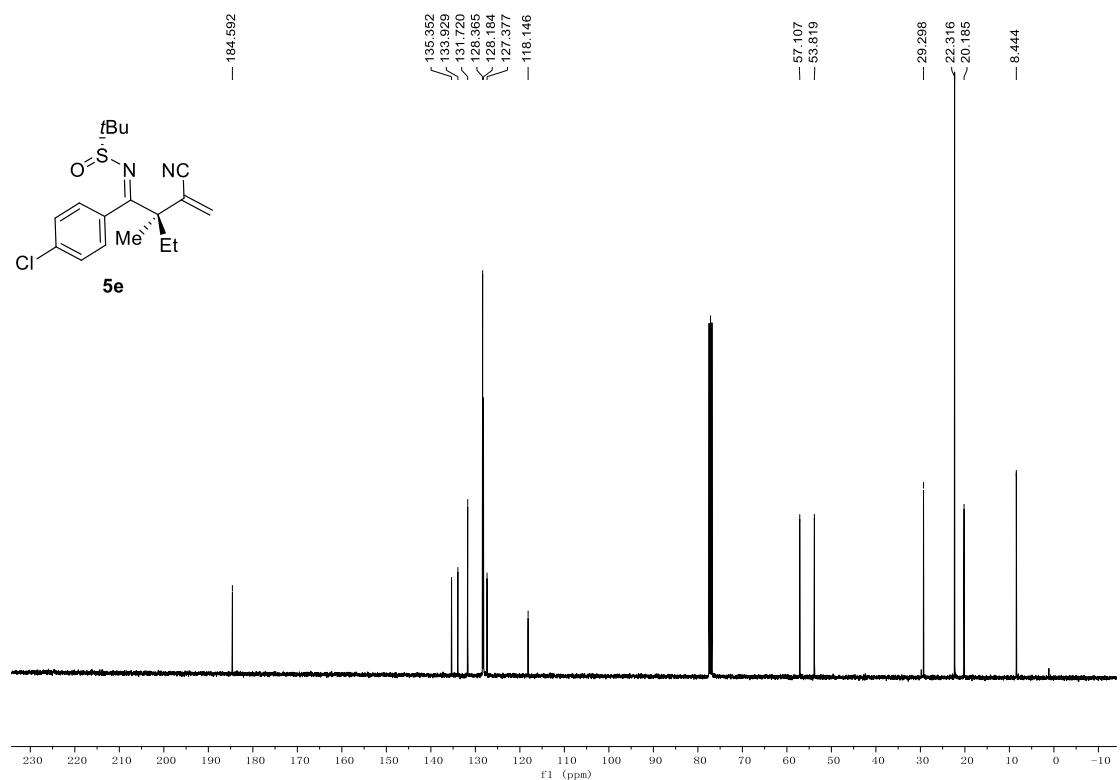

<sup>13</sup>C NMR spectrum (CDCl<sub>3</sub>, 100 MHz) of 5e

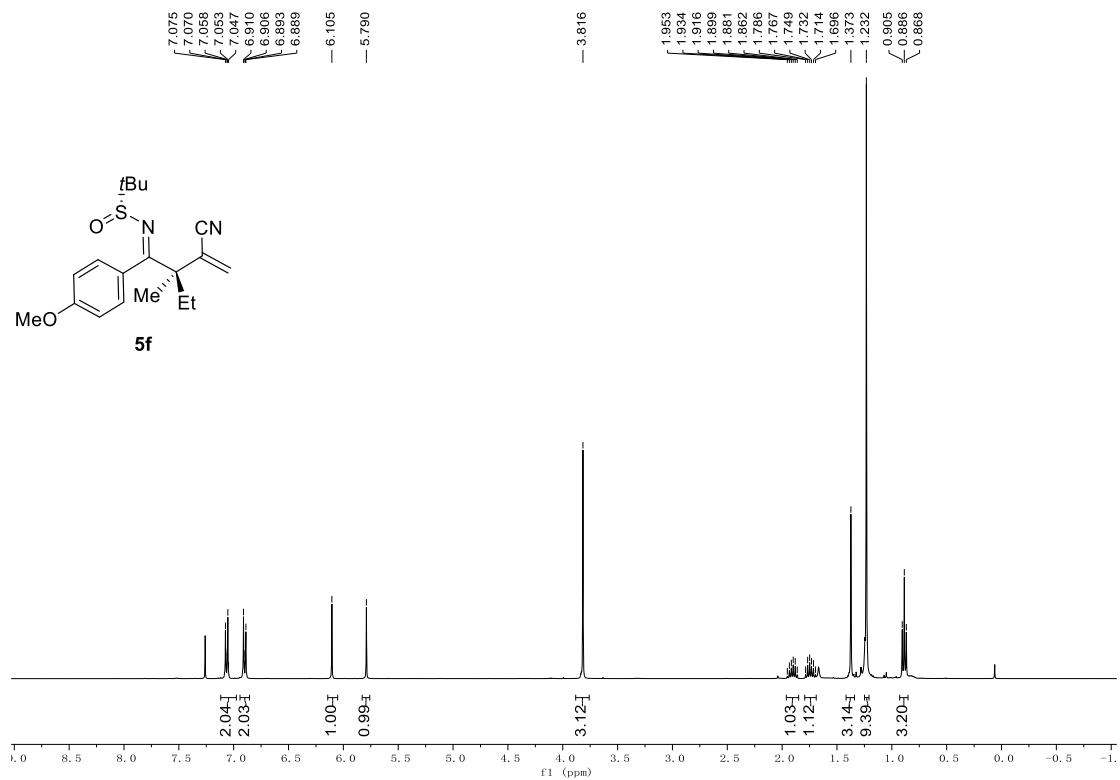

<sup>1</sup>H NMR spectrum (CDCl<sub>3</sub>, 400 MHz) of **5f**

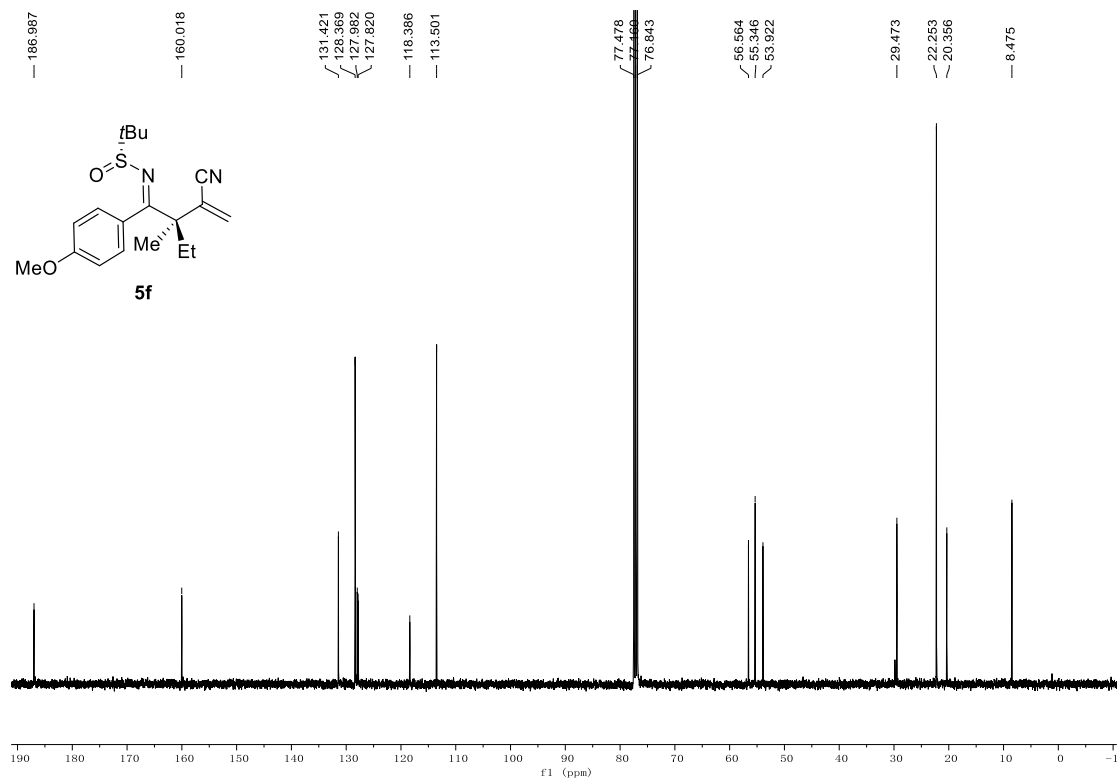

<sup>13</sup>C NMR spectrum (CDCl<sub>3</sub>, 100 MHz) of **5f**



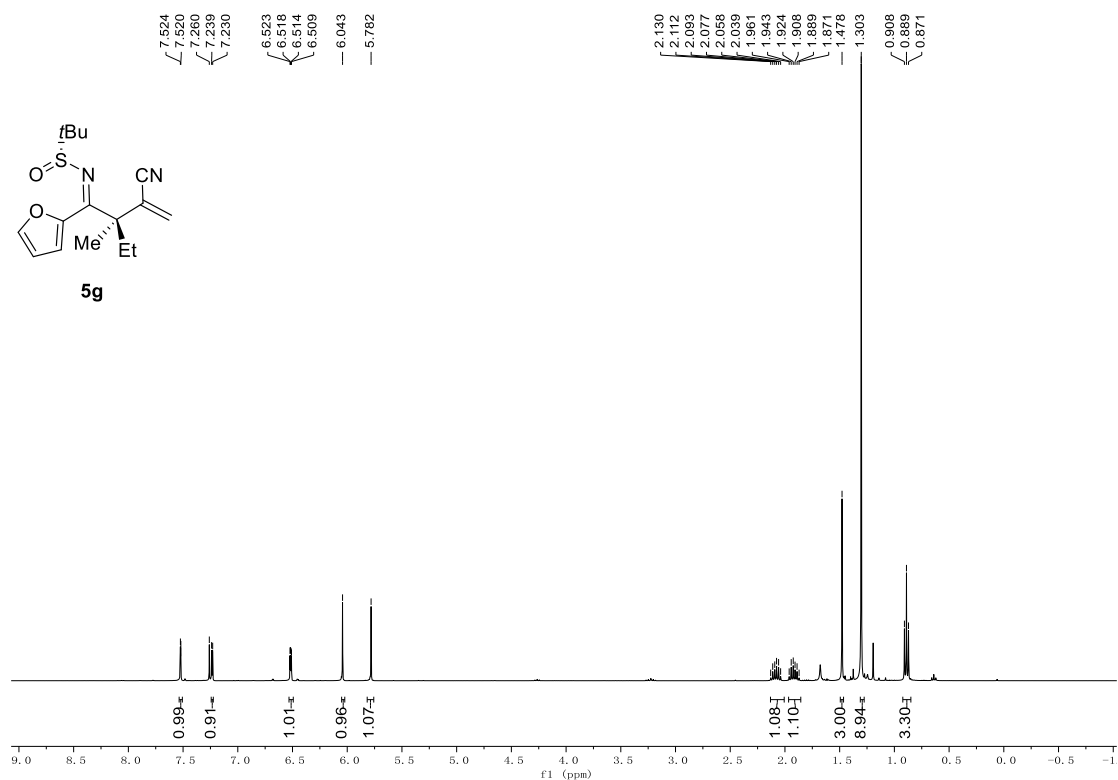

<sup>1</sup>H NMR spectrum (CDCl<sub>3</sub>, 400 MHz) of **5g**

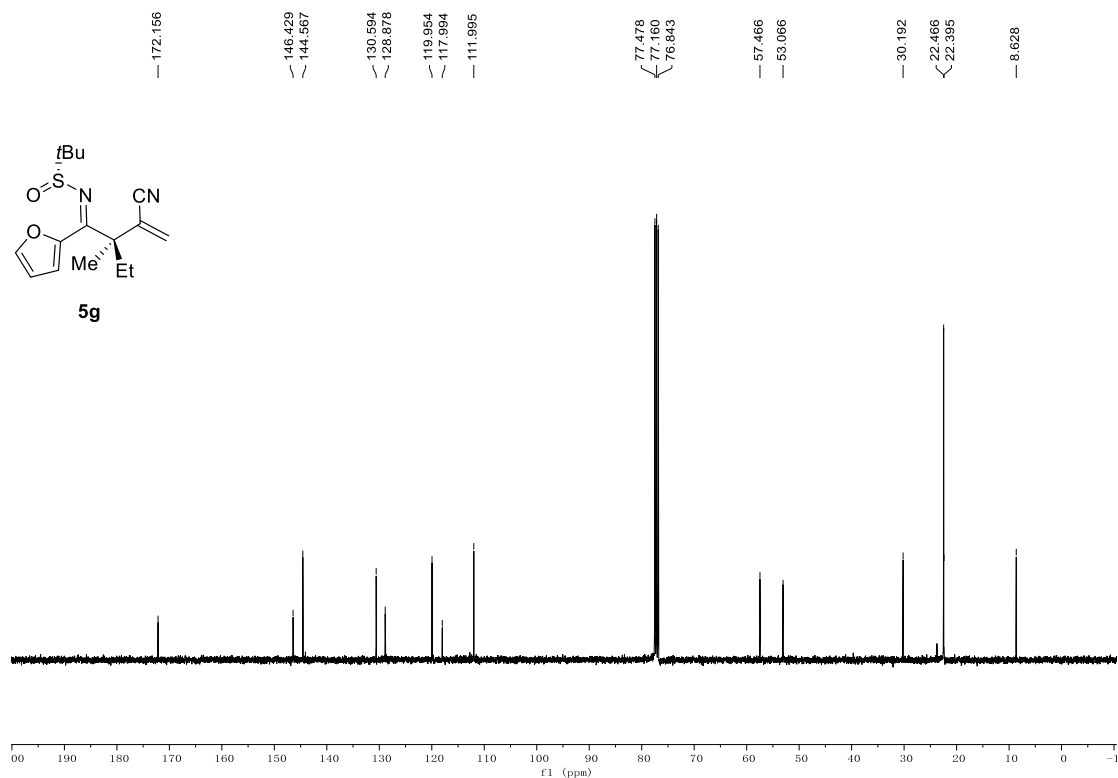

<sup>13</sup>C NMR spectrum (CDCl<sub>3</sub>, 100 MHz) of **5g**

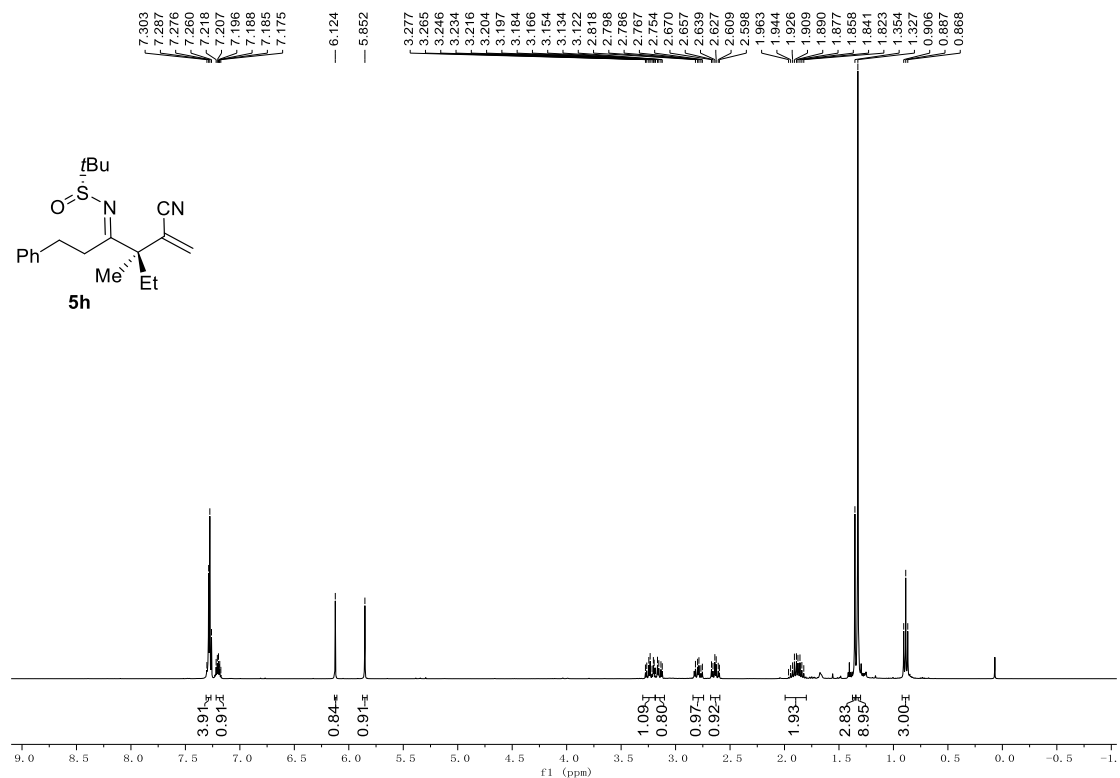

**<sup>1</sup>H NMR spectrum (CDCl<sub>3</sub>, 400 MHz) of **5h****

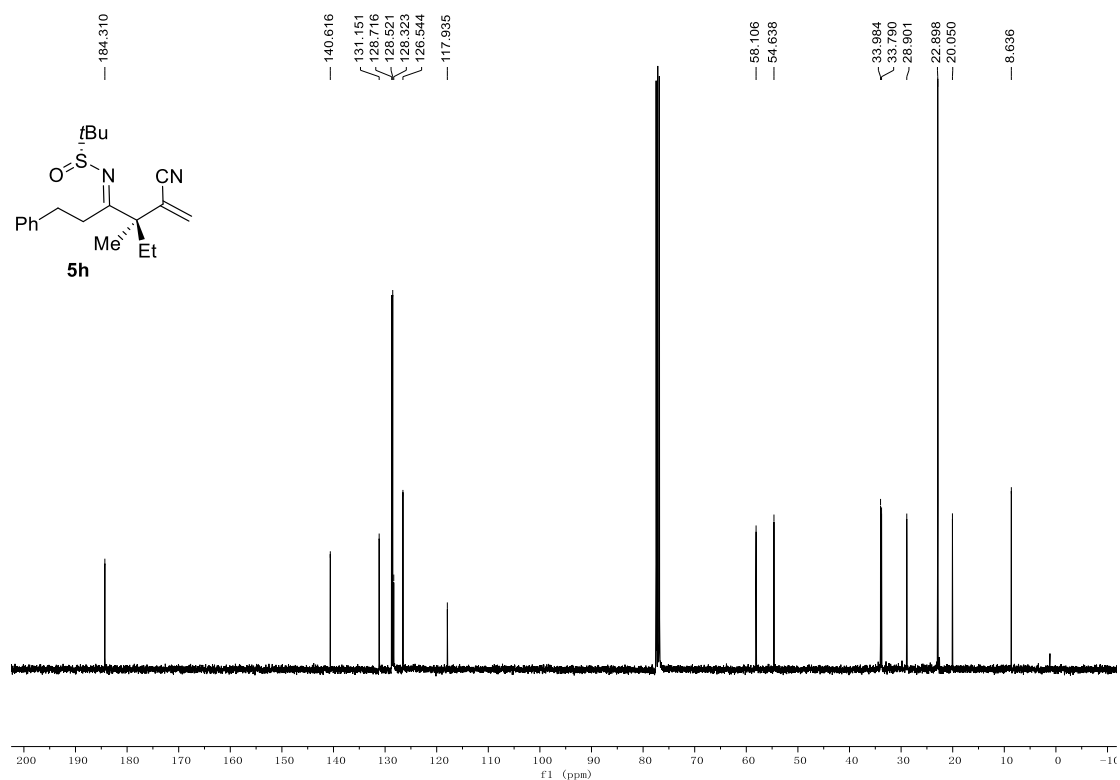

**<sup>13</sup>C NMR spectrum (CDCl<sub>3</sub>, 100 MHz) of **5h****

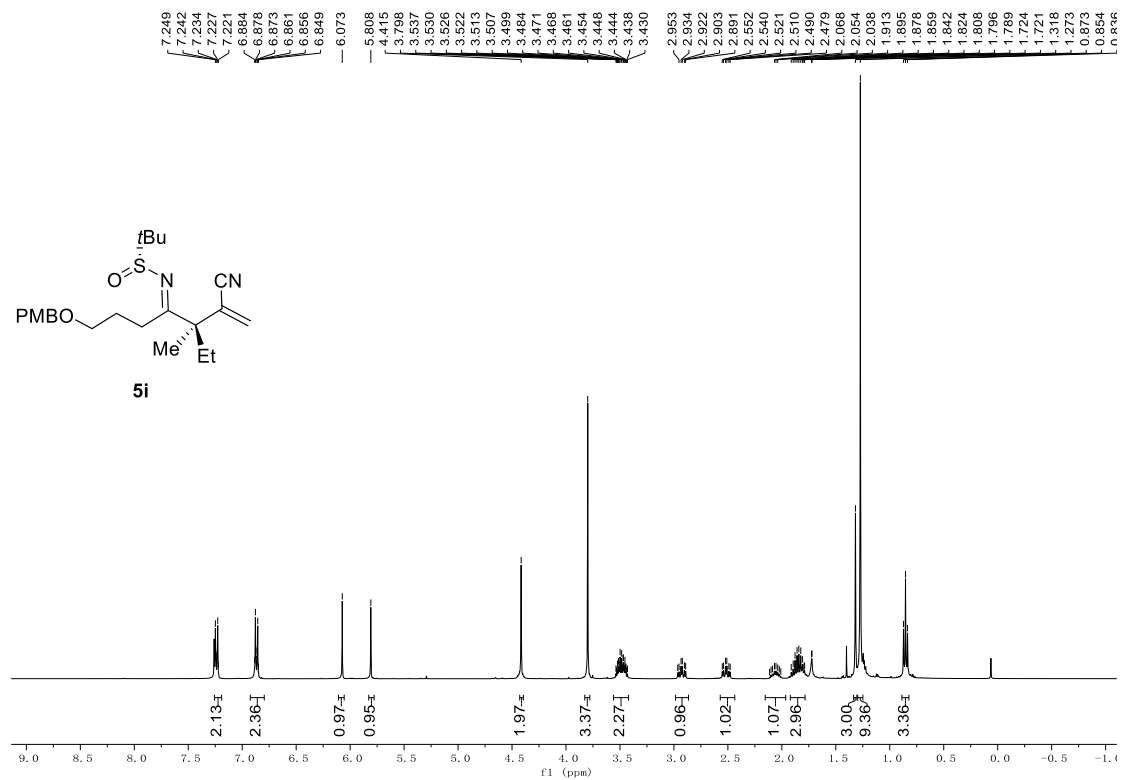

**1H NMR spectrum (CDCl<sub>3</sub>, 400 MHz) of **5i****

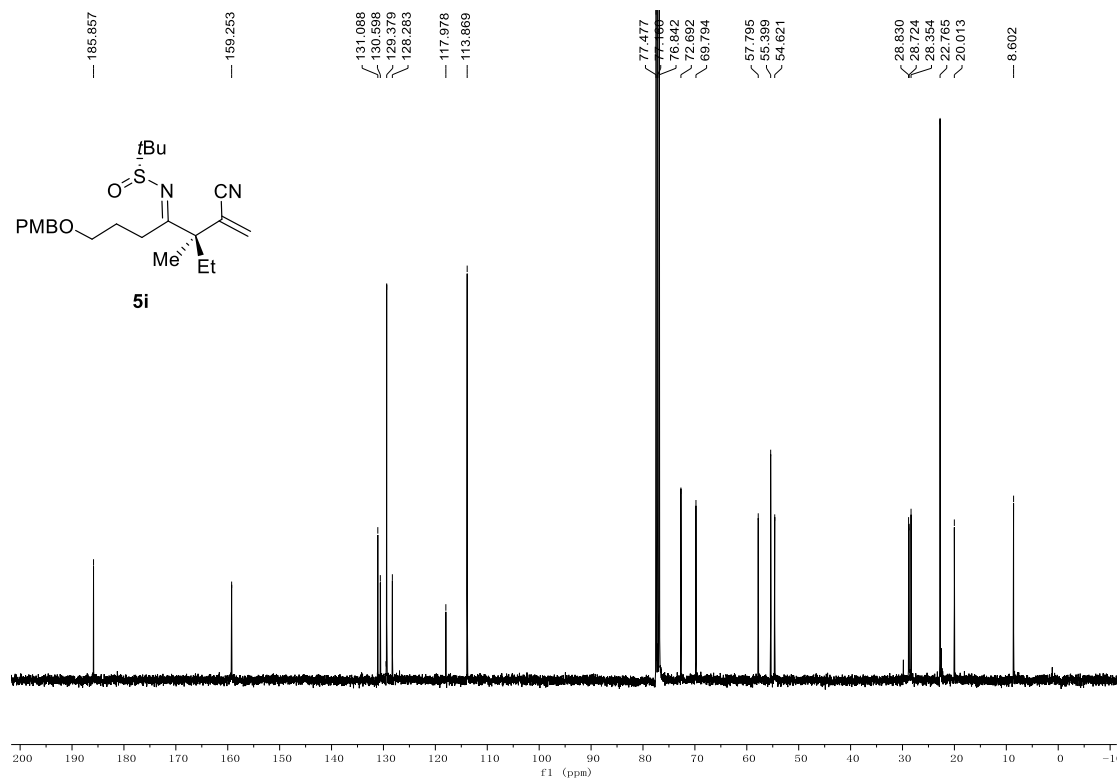

**13C NMR spectrum (CDCl<sub>3</sub>, 100 MHz) of **5i****

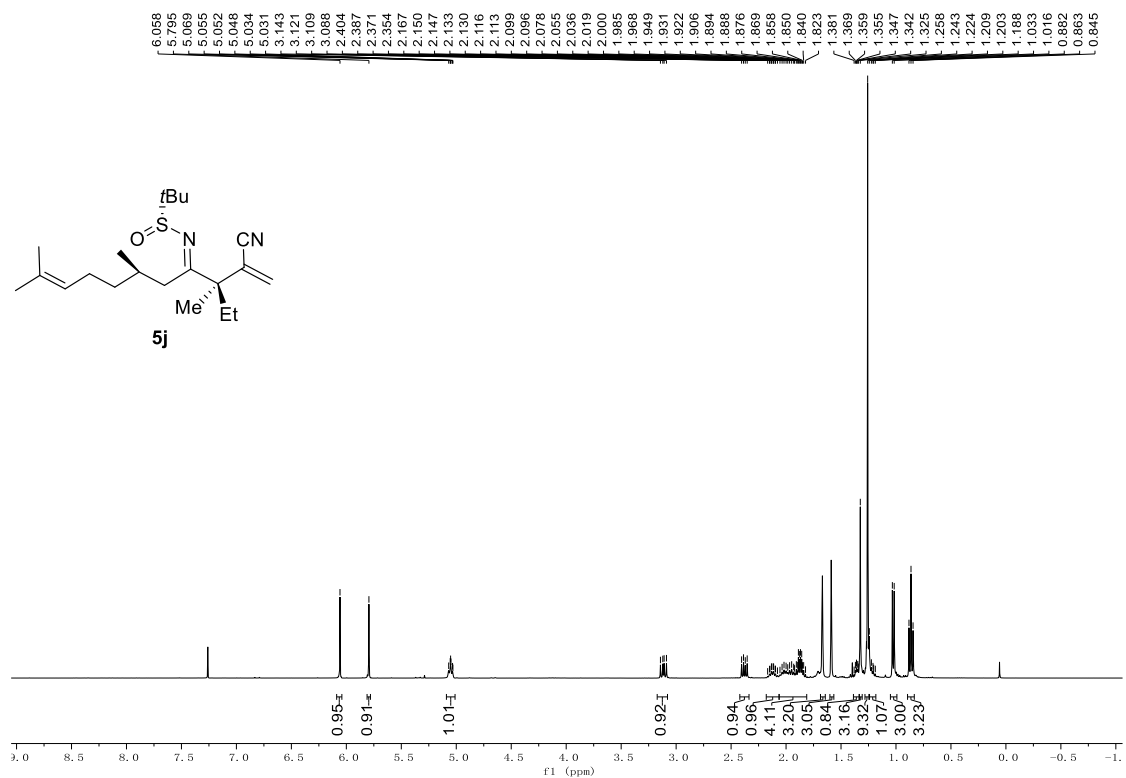

<sup>1</sup>H NMR spectrum (CDCl<sub>3</sub>, 400 MHz) of **5j**

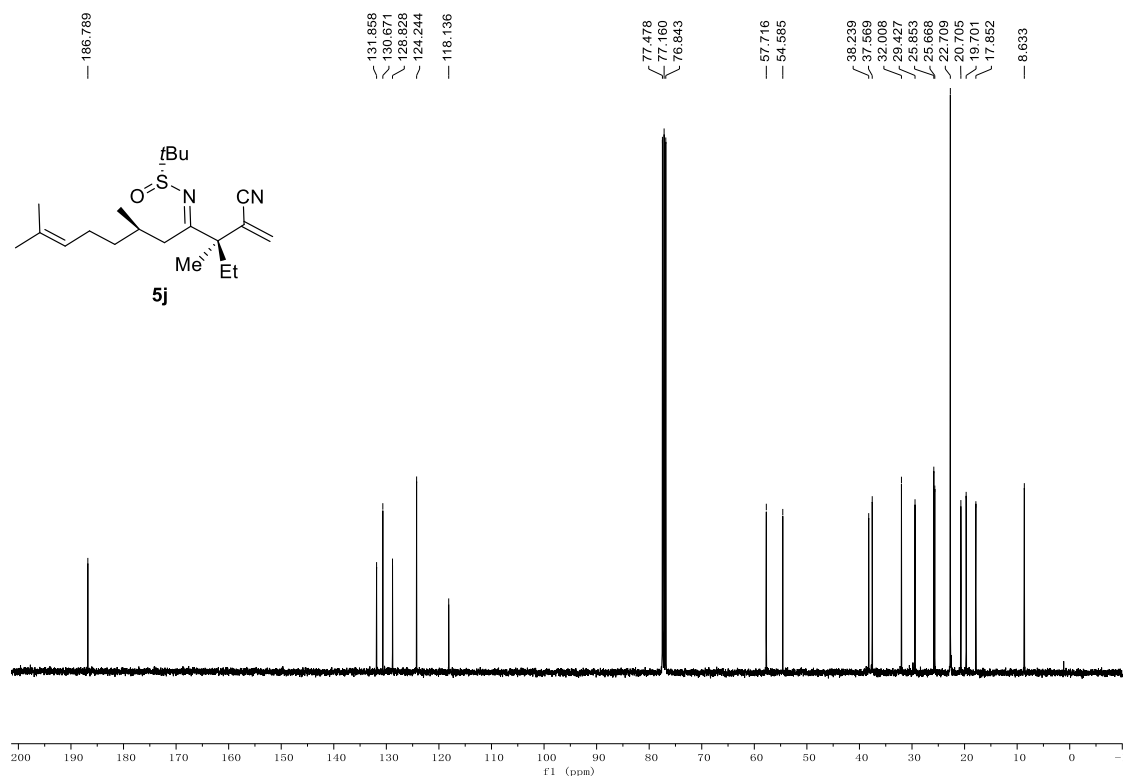

<sup>13</sup>C NMR spectrum (CDCl<sub>3</sub>, 100 MHz) of **5j**



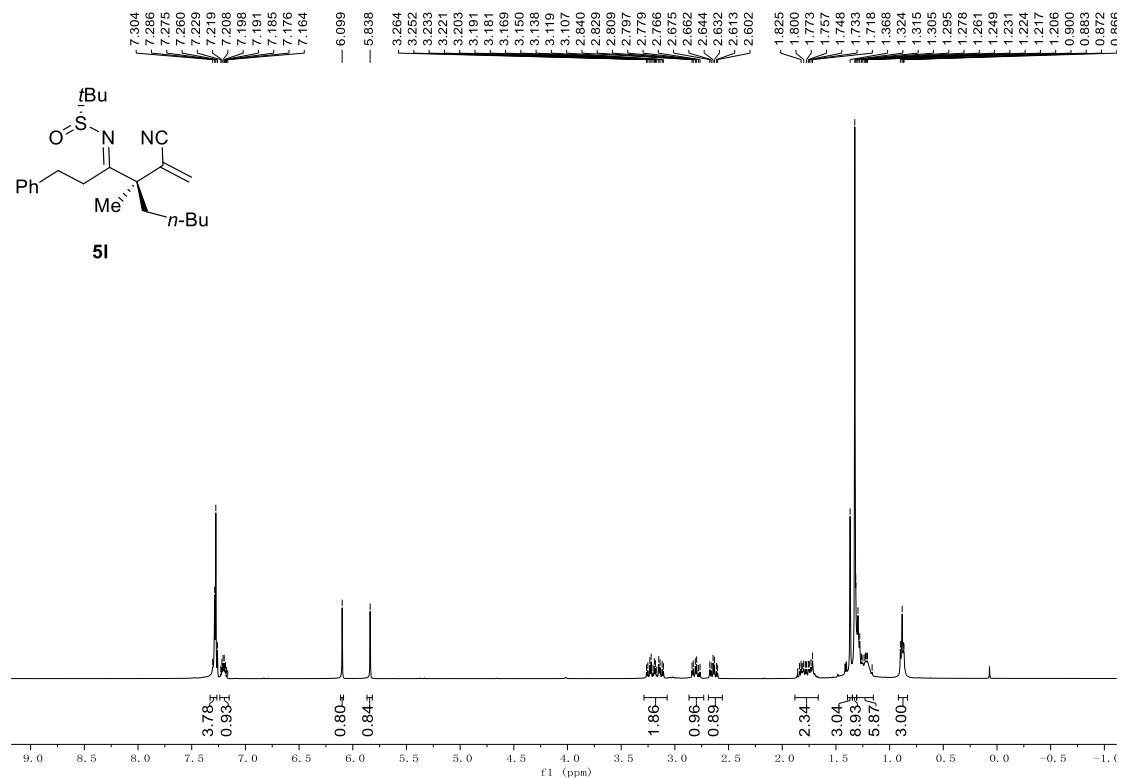

<sup>1</sup>H NMR spectrum (CDCl<sub>3</sub>, 400 MHz) of **5I**

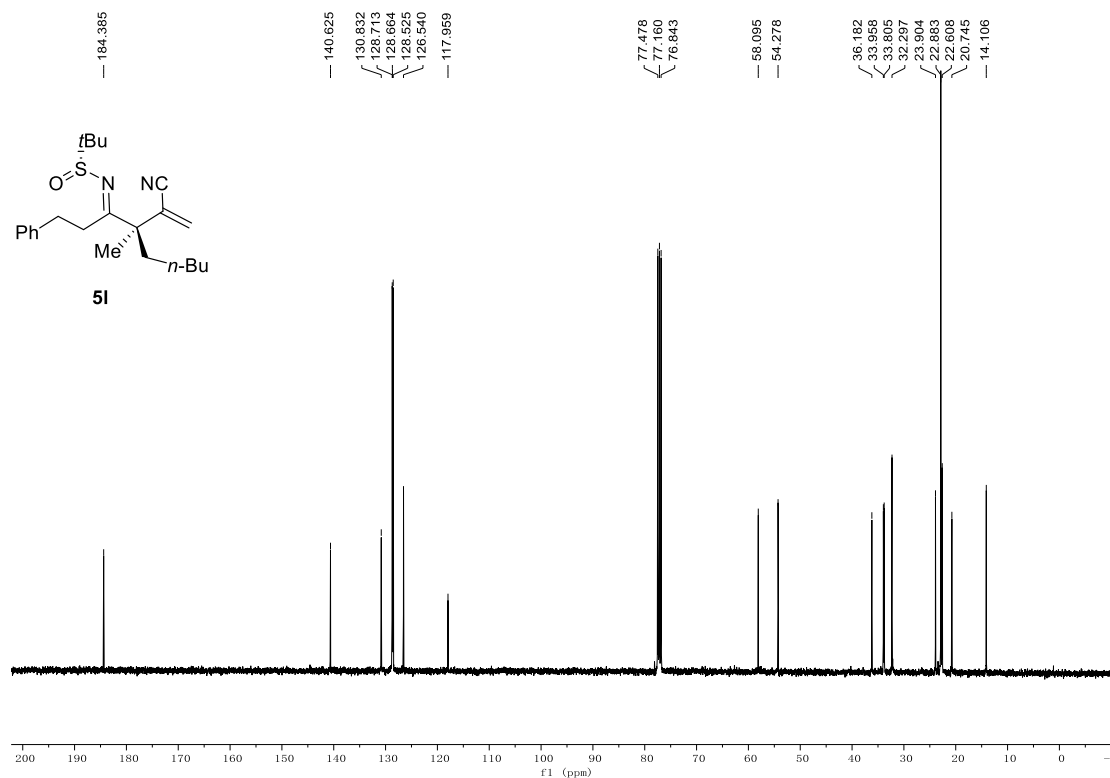

<sup>13</sup>C NMR spectrum (CDCl<sub>3</sub>, 100 MHz) of **5I**

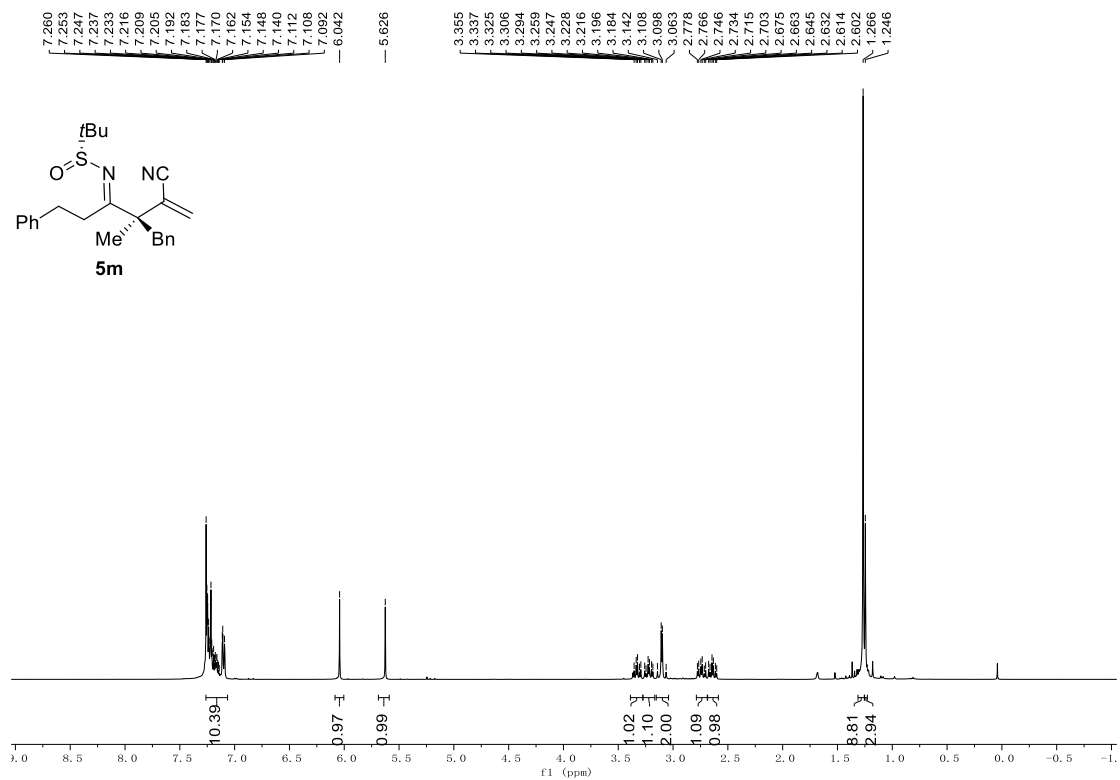

**<sup>1</sup>H NMR spectrum (CDCl<sub>3</sub>, 400 MHz) of **5m****

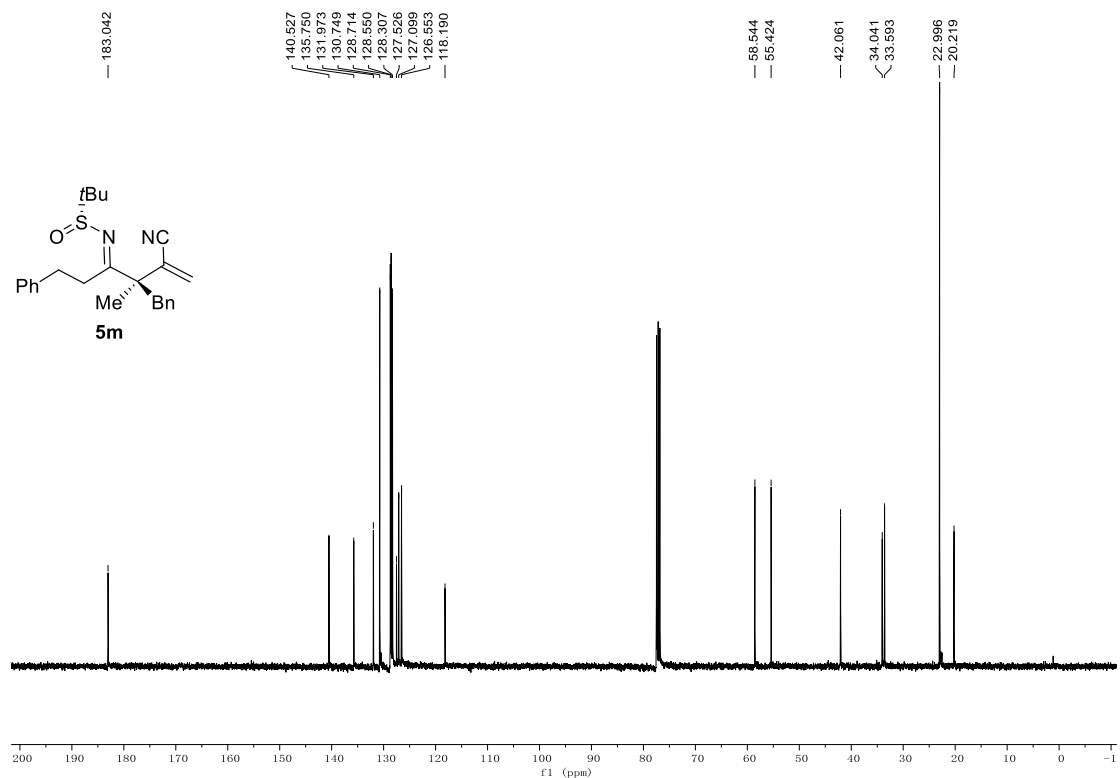

**<sup>13</sup>C NMR spectrum (CDCl<sub>3</sub>, 100 MHz) of **5m****

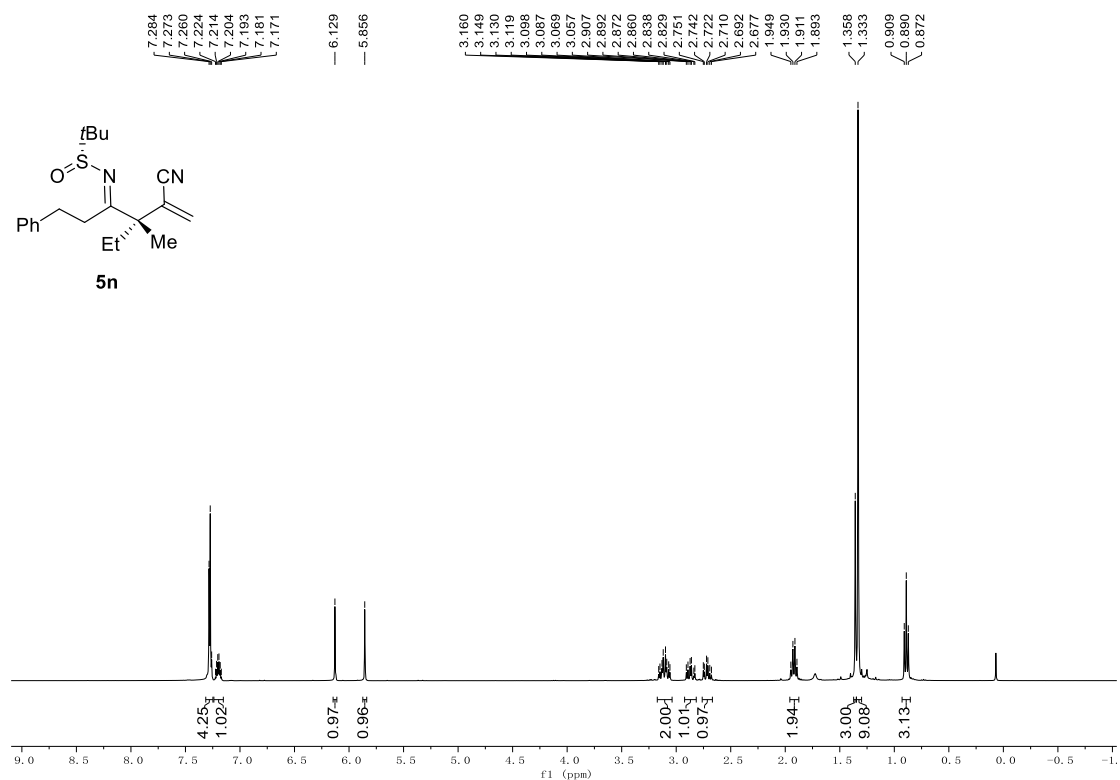

**<sup>1</sup>H NMR spectrum (CDCl<sub>3</sub>, 400 MHz) of **5n****

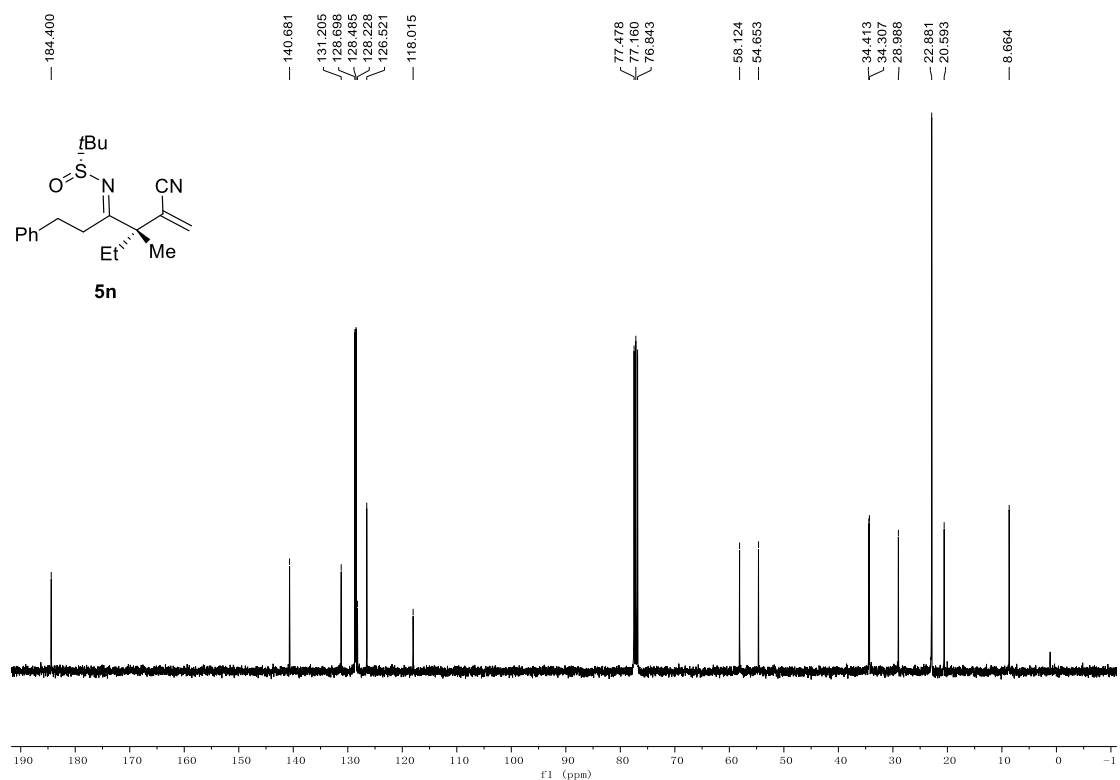

**<sup>13</sup>C NMR spectrum (CDCl<sub>3</sub>, 100 MHz) of **5n****



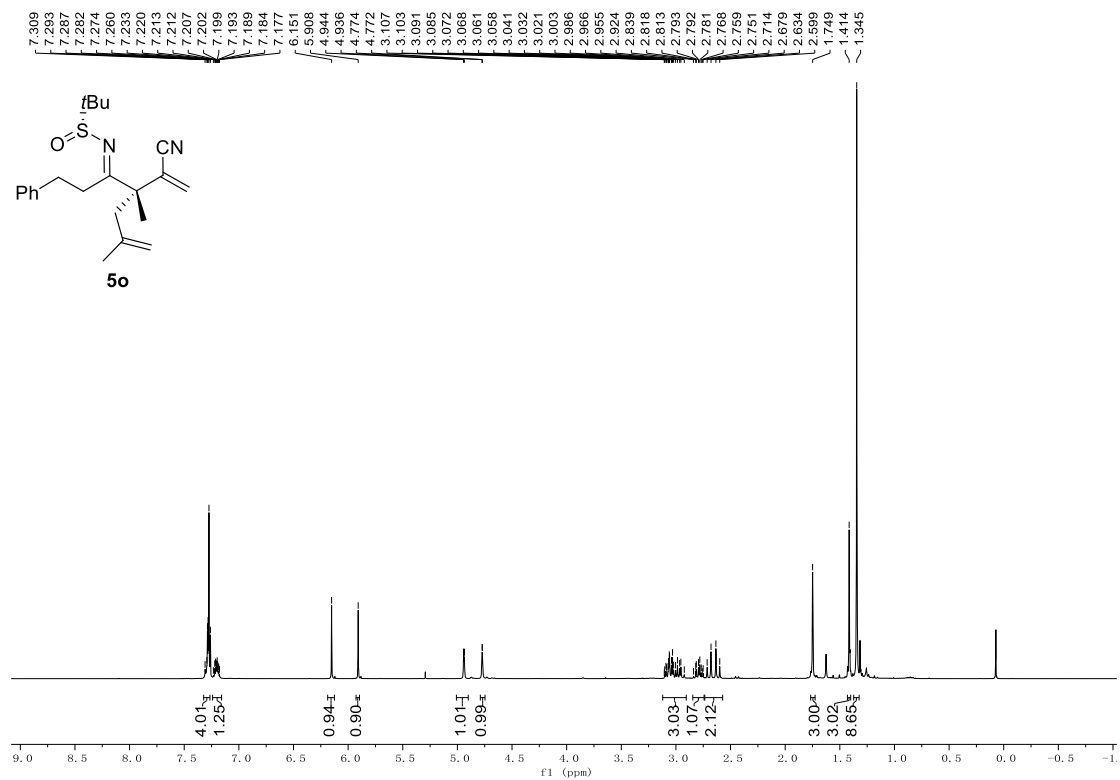

<sup>1</sup>H NMR spectrum (CDCl<sub>3</sub>, 400 MHz) of **5o**

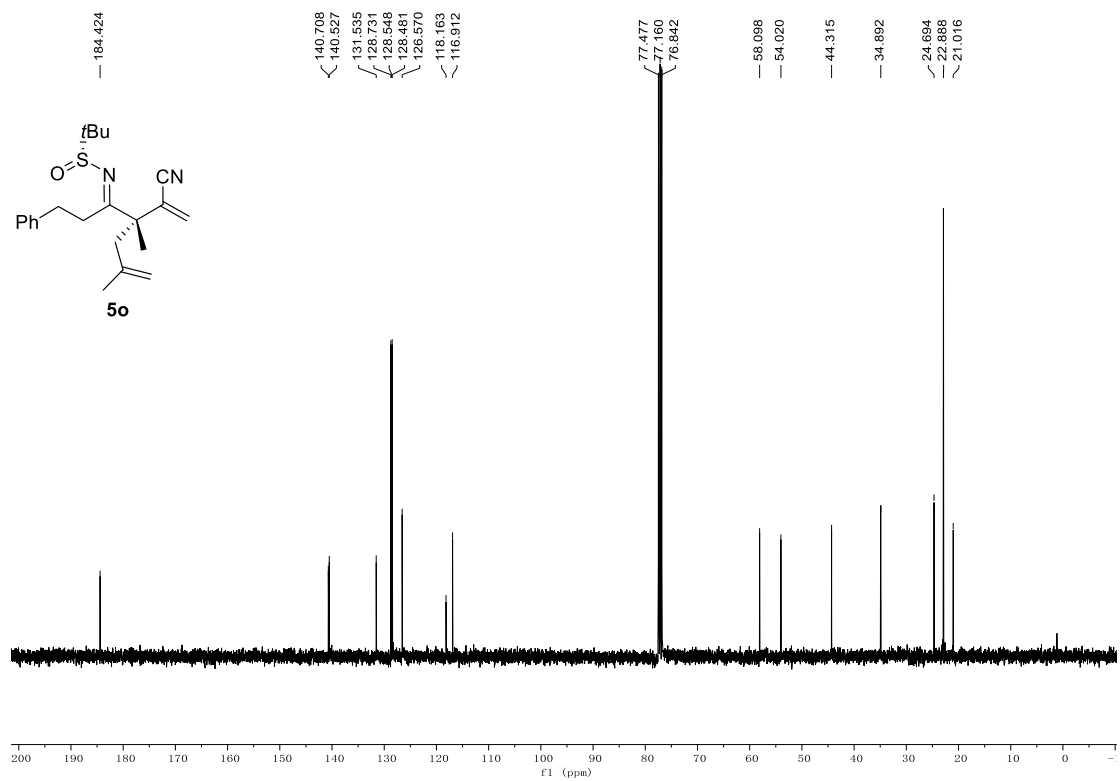

<sup>13</sup>C NMR spectrum (CDCl<sub>3</sub>, 100 MHz) of **5o**

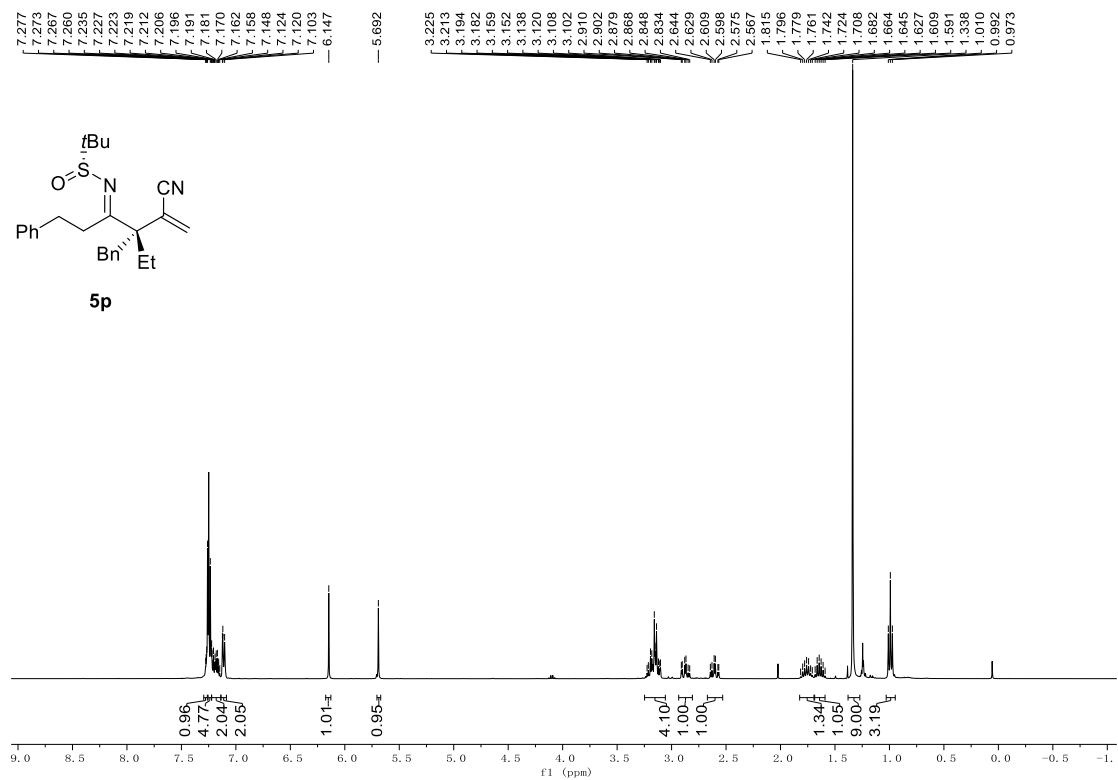

<sup>1</sup>H NMR spectrum (CDCl<sub>3</sub>, 400 MHz) of **5p**

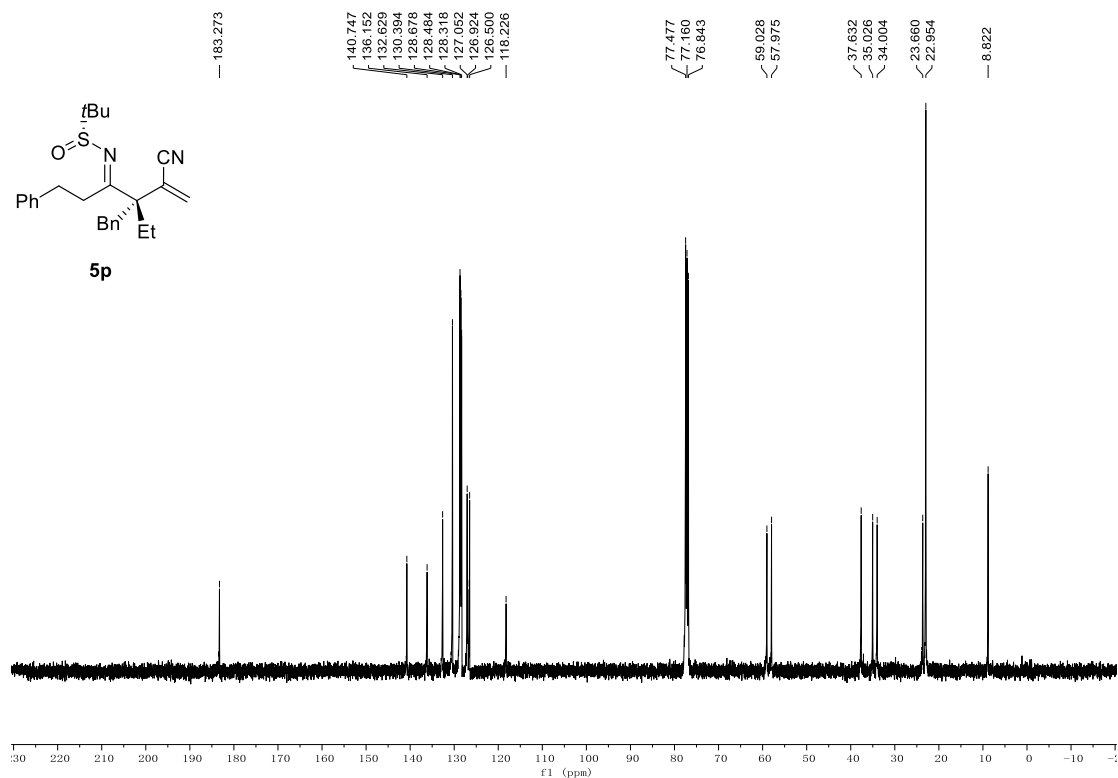

<sup>13</sup>C NMR spectrum (CDCl<sub>3</sub>, 100 MHz) of **5p**

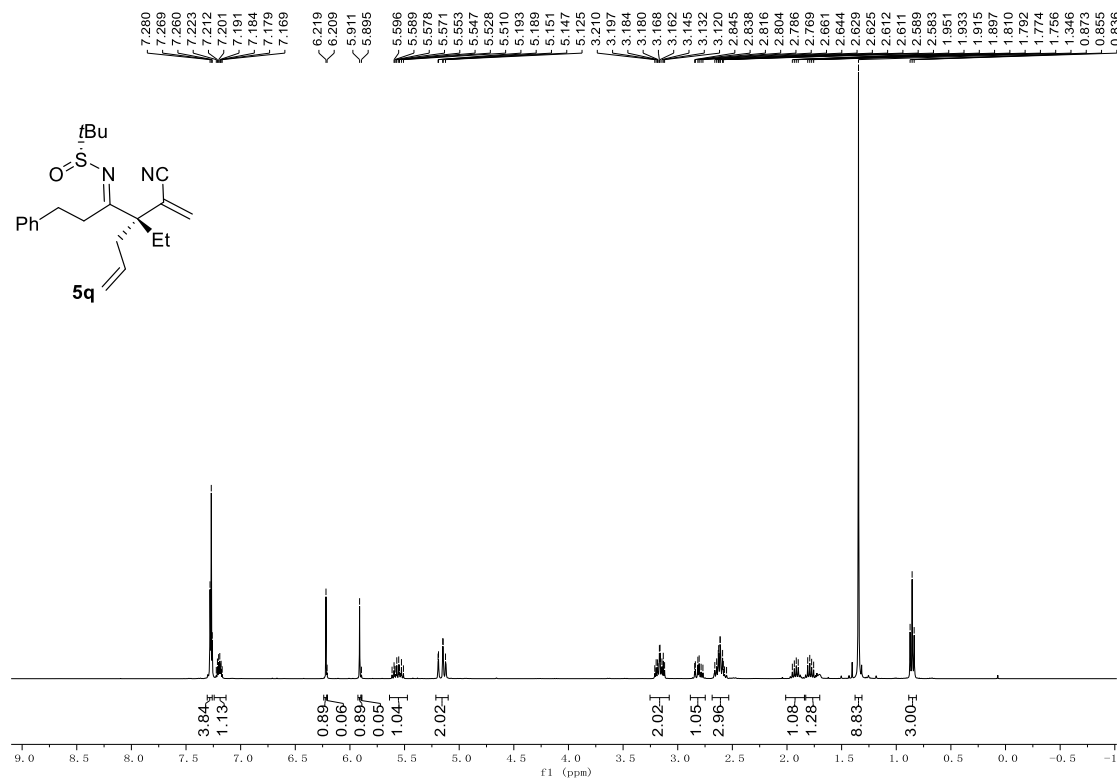

**<sup>1</sup>H NMR spectrum (CDCl<sub>3</sub>, 400 MHz) of **5q****

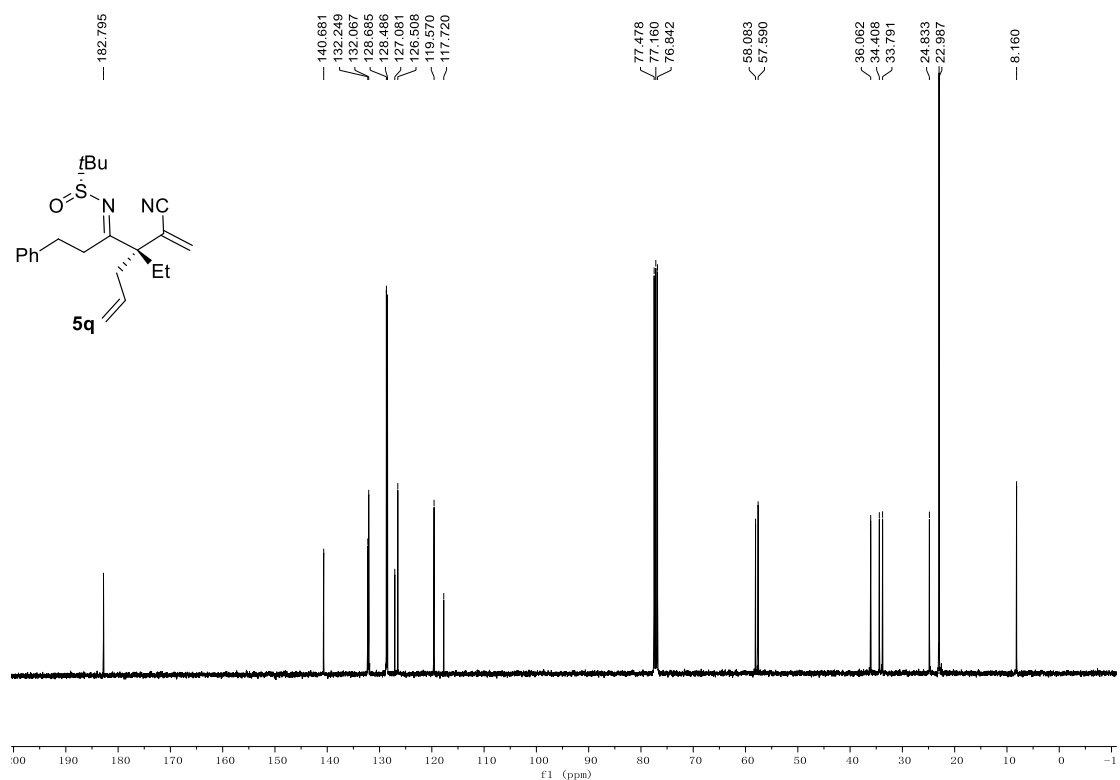

**<sup>13</sup>C NMR spectrum (CDCl<sub>3</sub>, 100 MHz) of **5q****

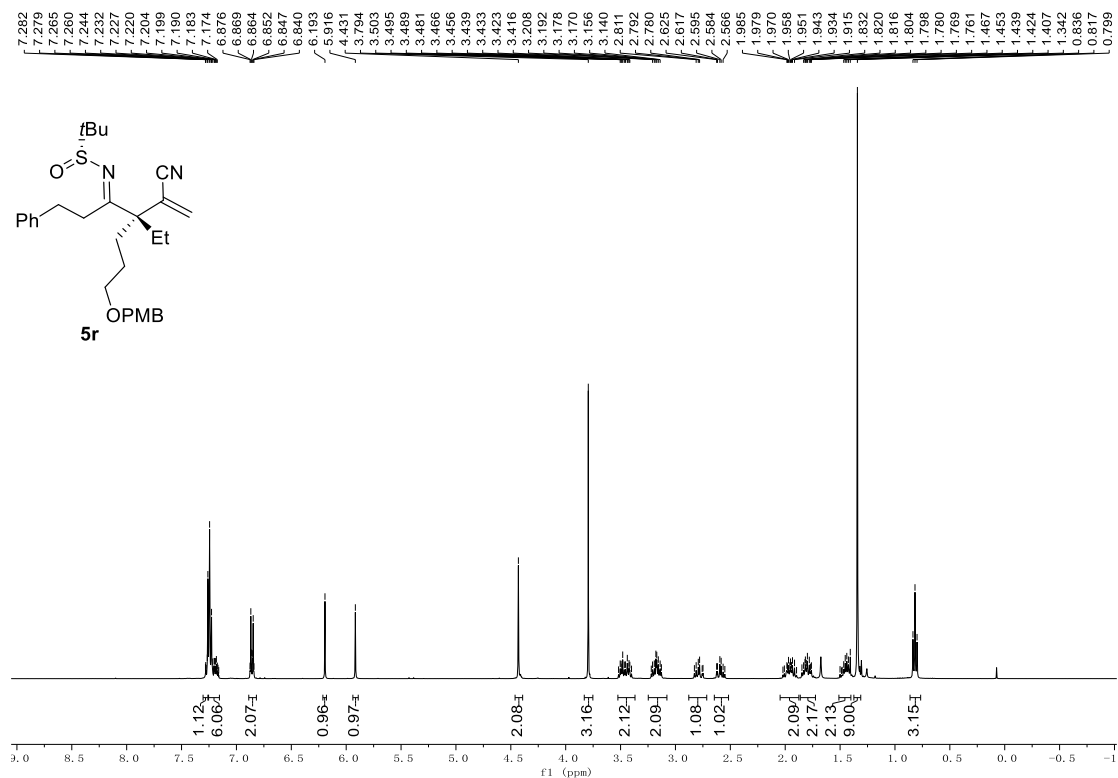

<sup>1</sup>H NMR spectrum (CDCl<sub>3</sub>, 400 MHz) of **5r**

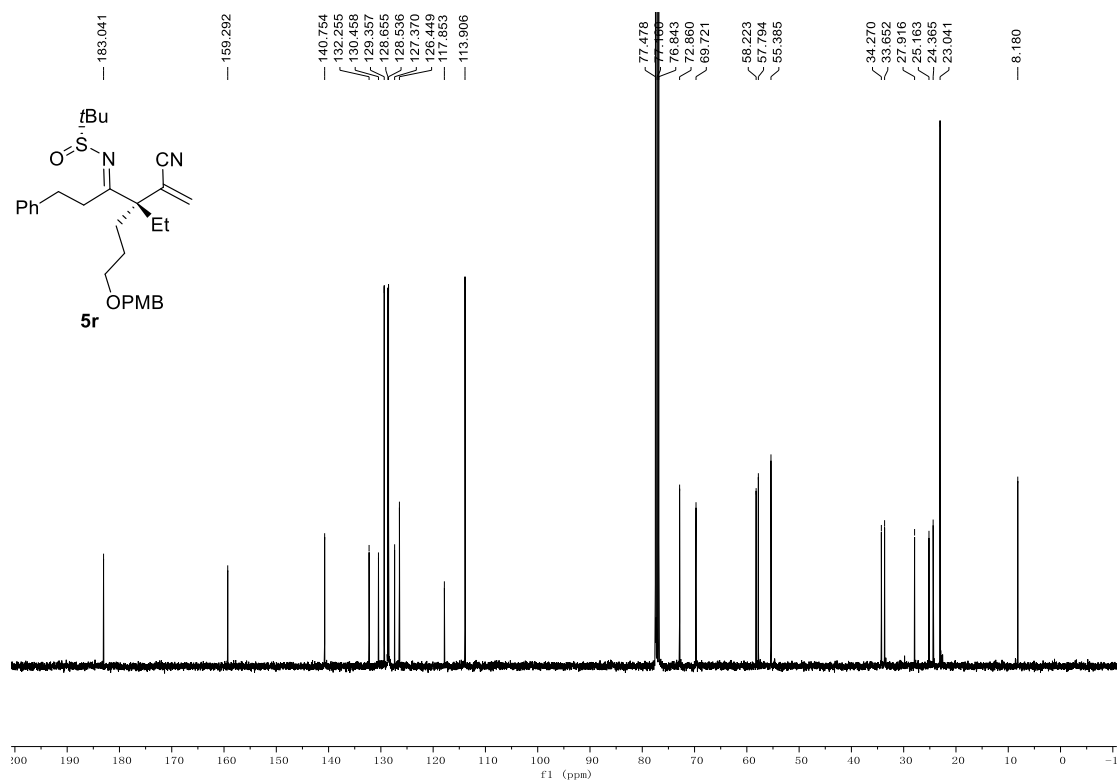

<sup>13</sup>C NMR spectrum (CDCl<sub>3</sub>, 100 MHz) of **5r**

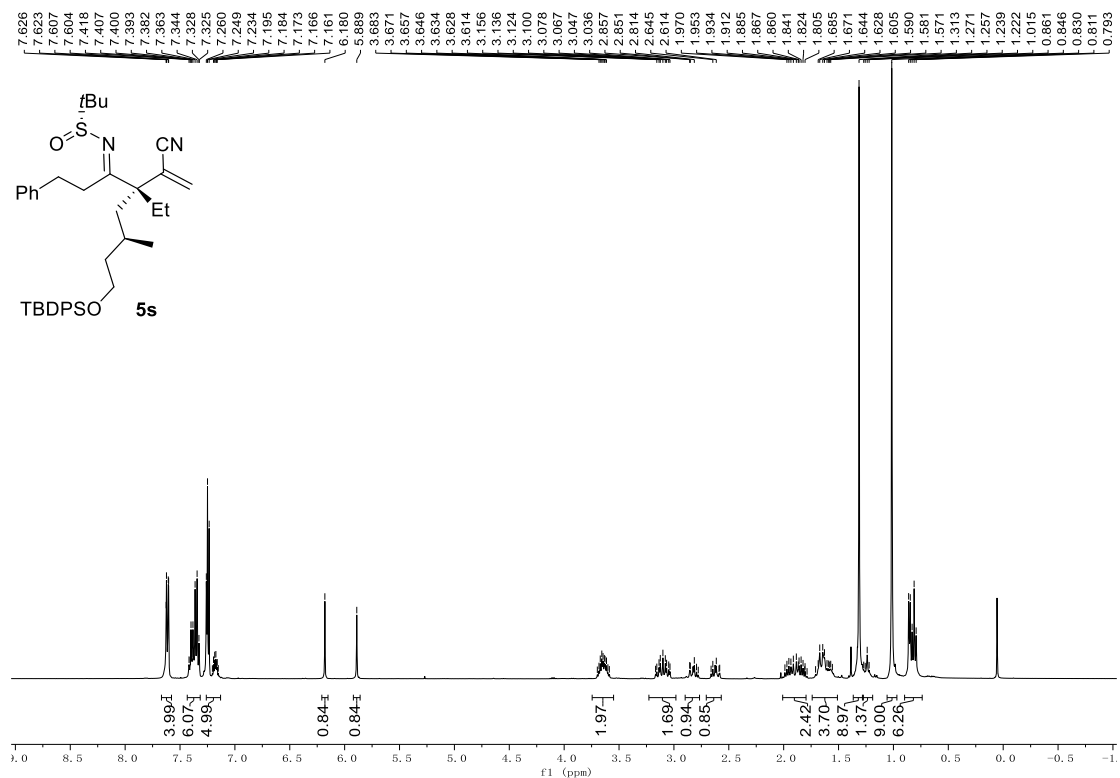

**<sup>1</sup>H NMR spectrum (CDCl<sub>3</sub>, 400 MHz) of 5s**

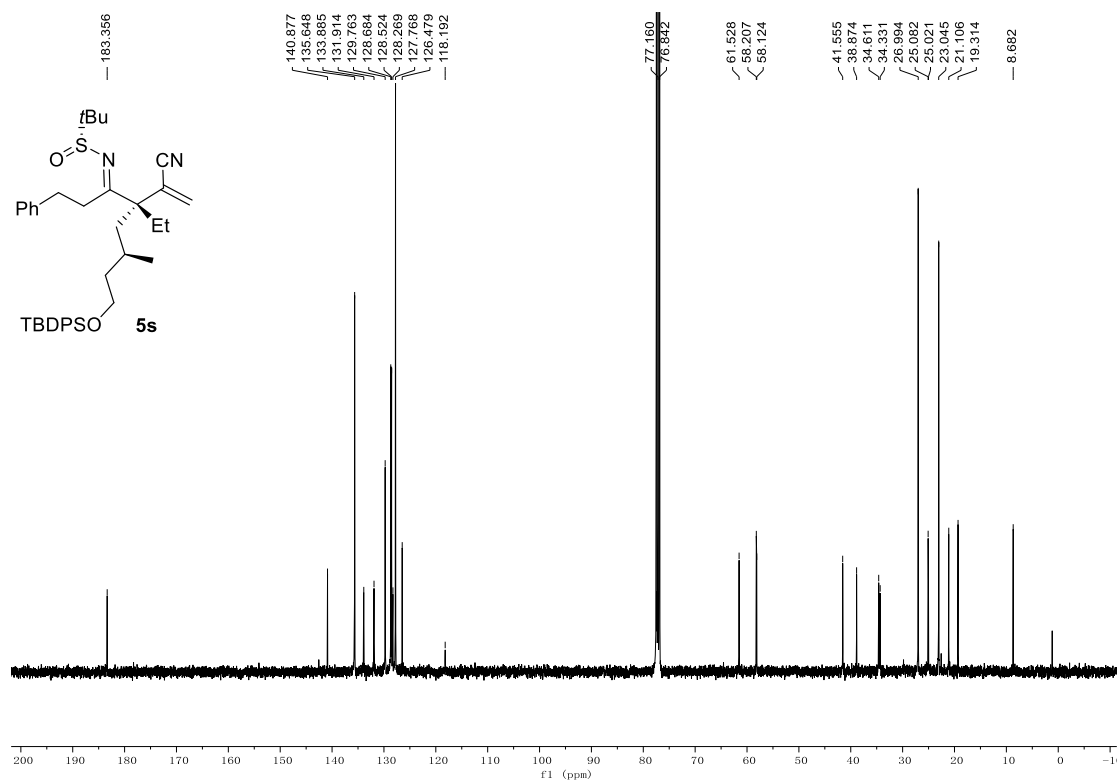

**<sup>13</sup>C NMR spectrum (CDCl<sub>3</sub>, 100 MHz) of 5s**

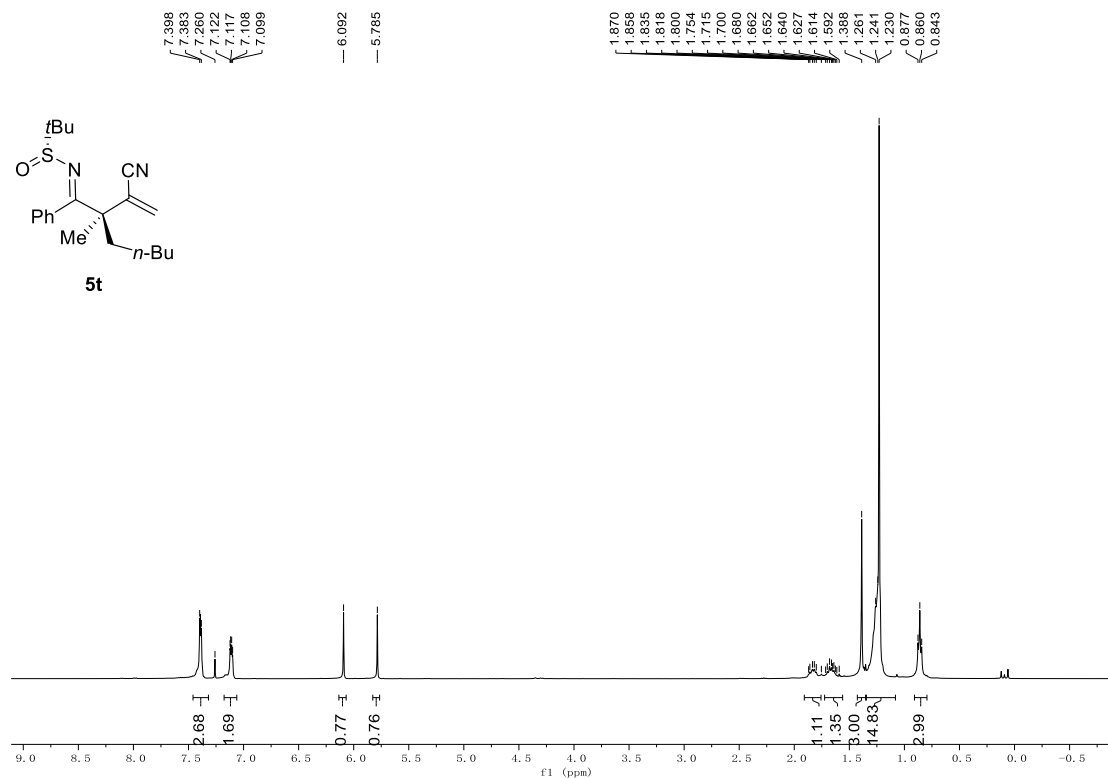

<sup>1</sup>H NMR spectrum (CDCl<sub>3</sub>, 400 MHz) of **5t**

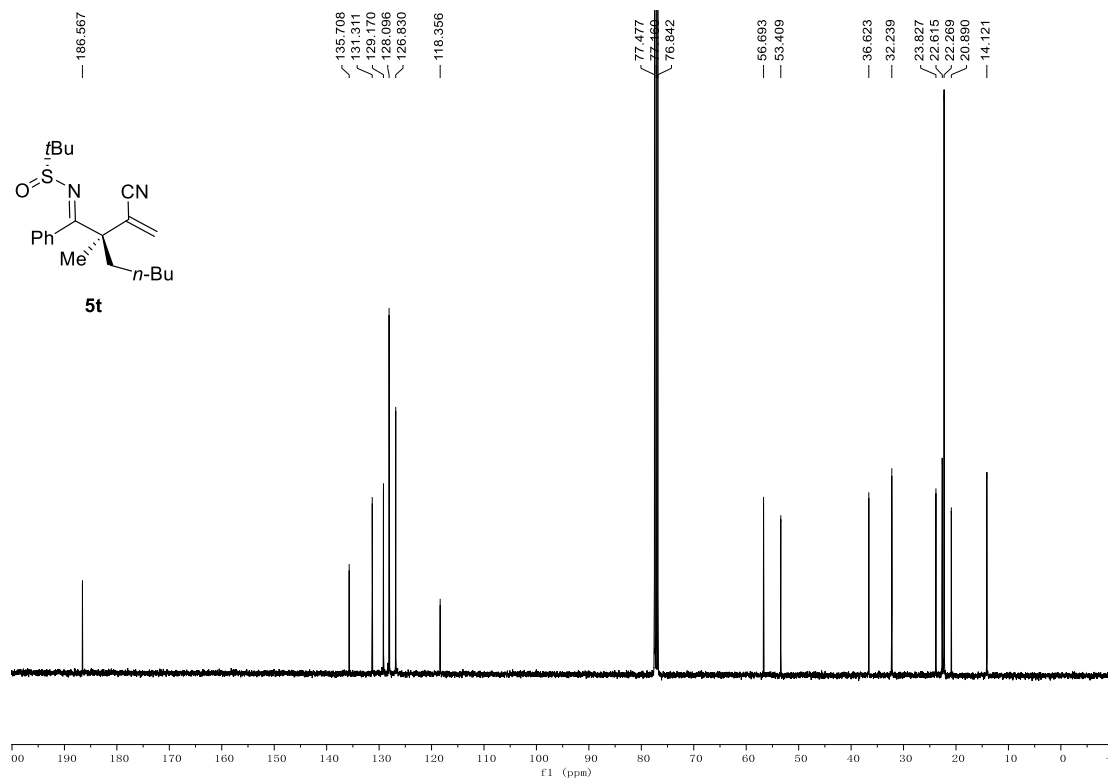

<sup>13</sup>C NMR spectrum (CDCl<sub>3</sub>, 100 MHz) of **5t**

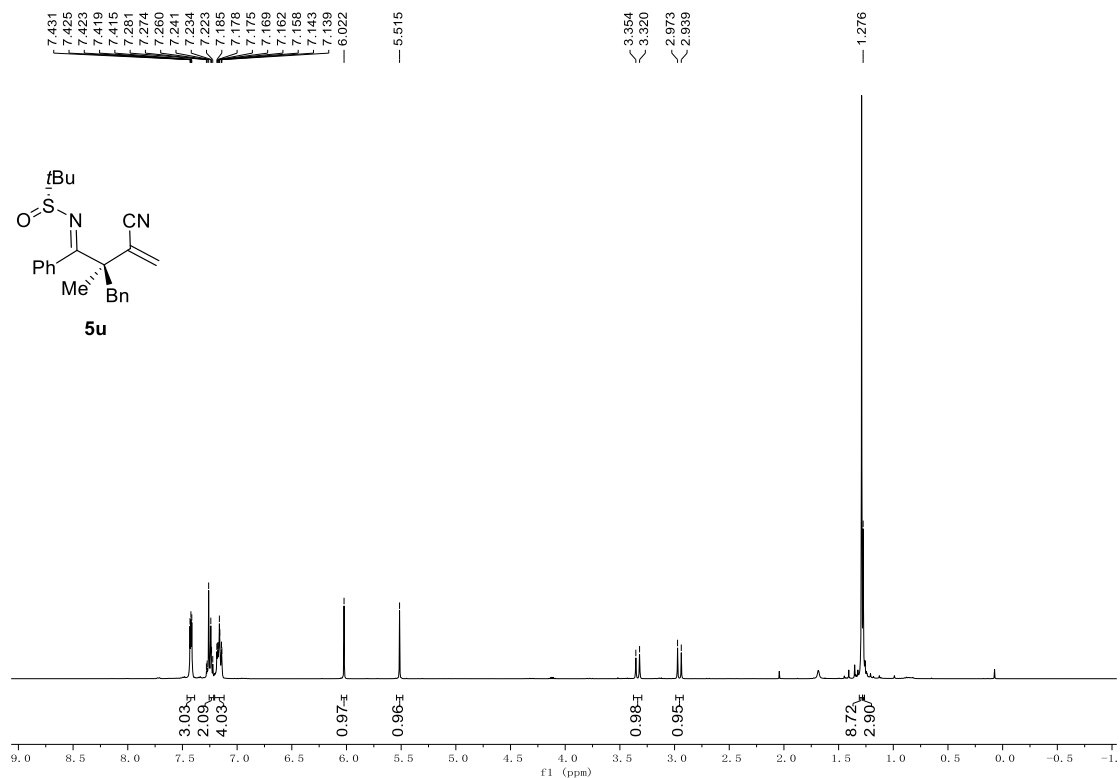

<sup>1</sup>H NMR spectrum (CDCl<sub>3</sub>, 400 MHz) of **5u**

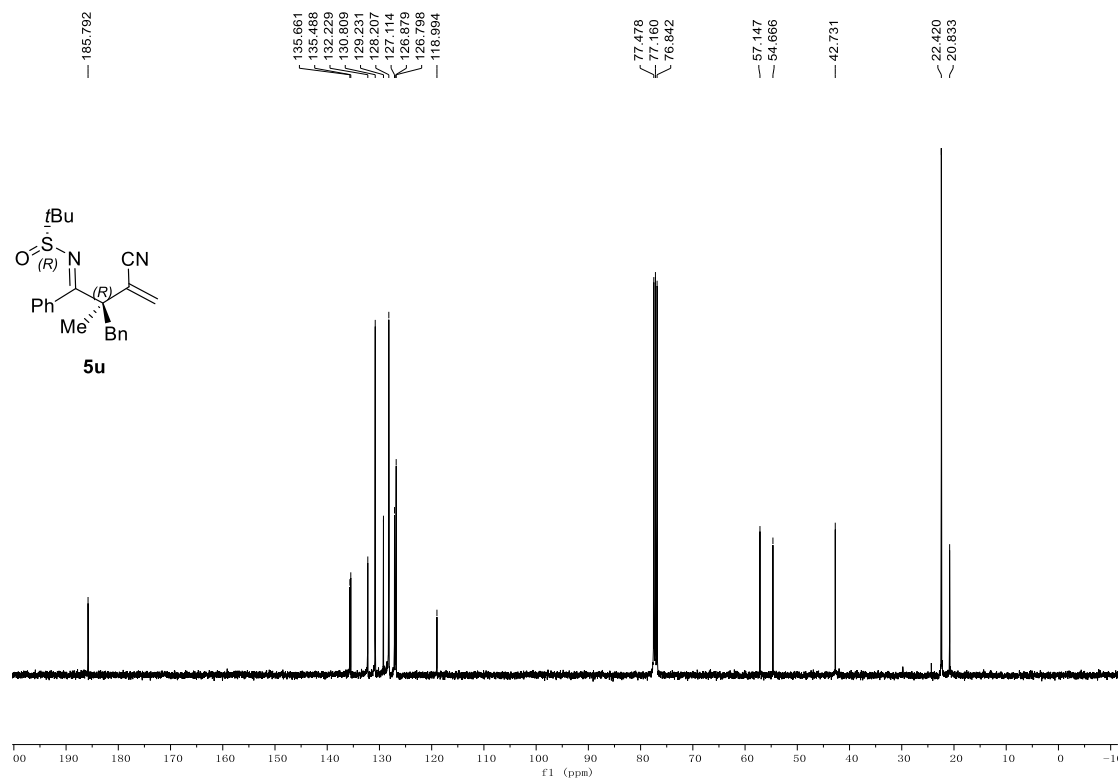

<sup>13</sup>C NMR spectrum (CDCl<sub>3</sub>, 100 MHz) of **5u**

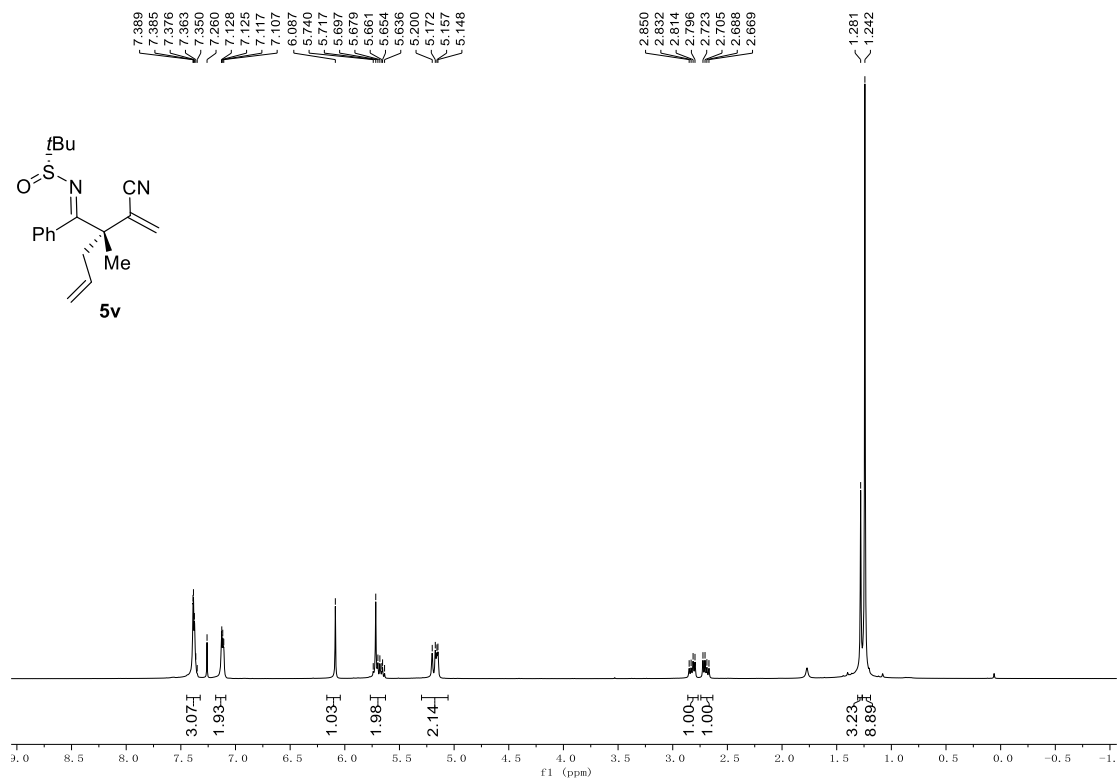

**<sup>1</sup>H NMR spectrum (CDCl<sub>3</sub>, 400 MHz) of **5v****

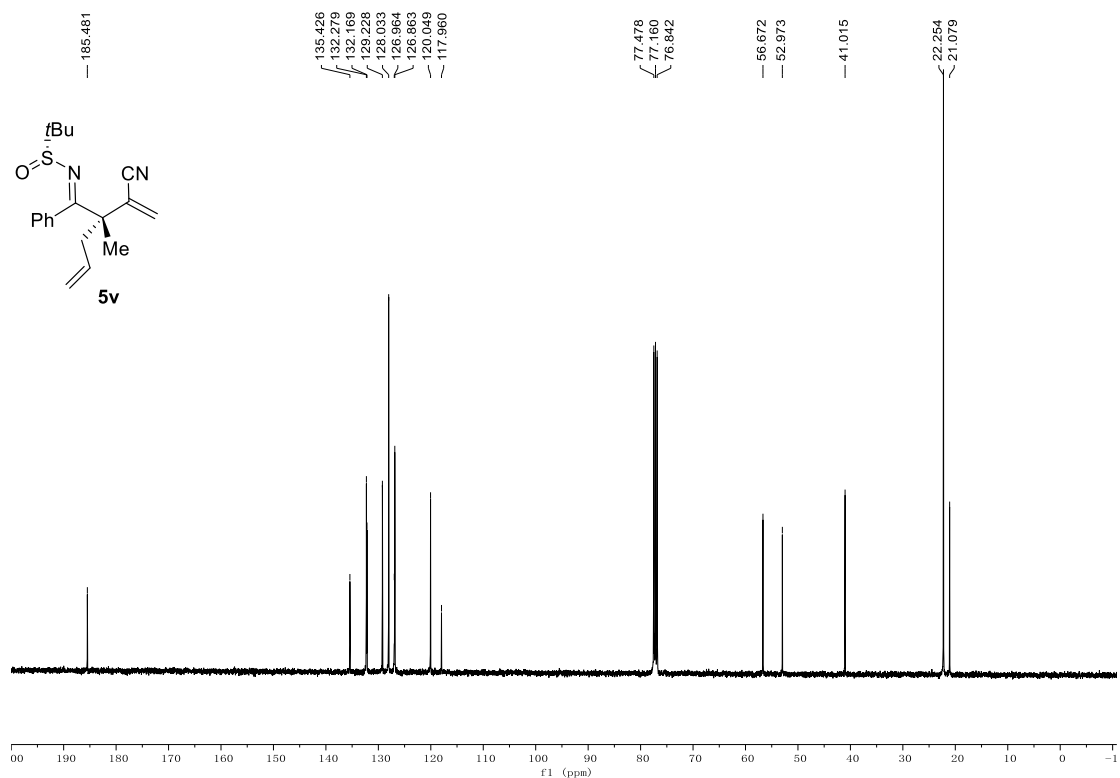

**<sup>13</sup>C NMR spectrum (CDCl<sub>3</sub>, 100 MHz) of **5v****



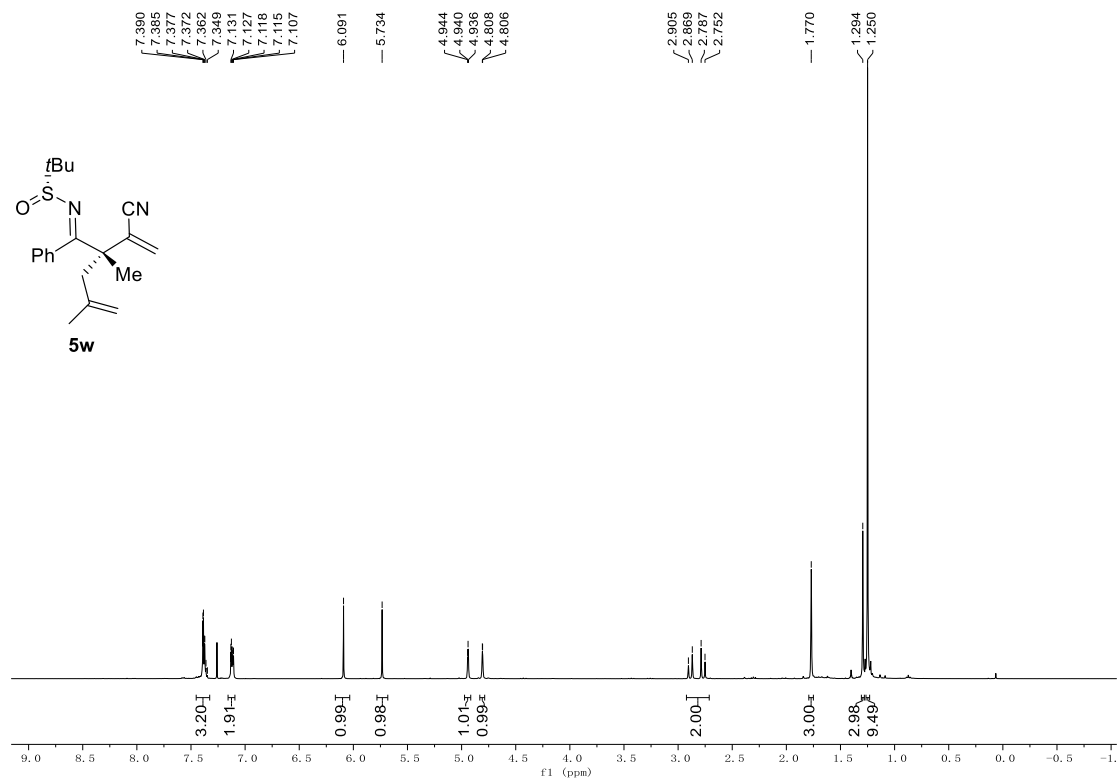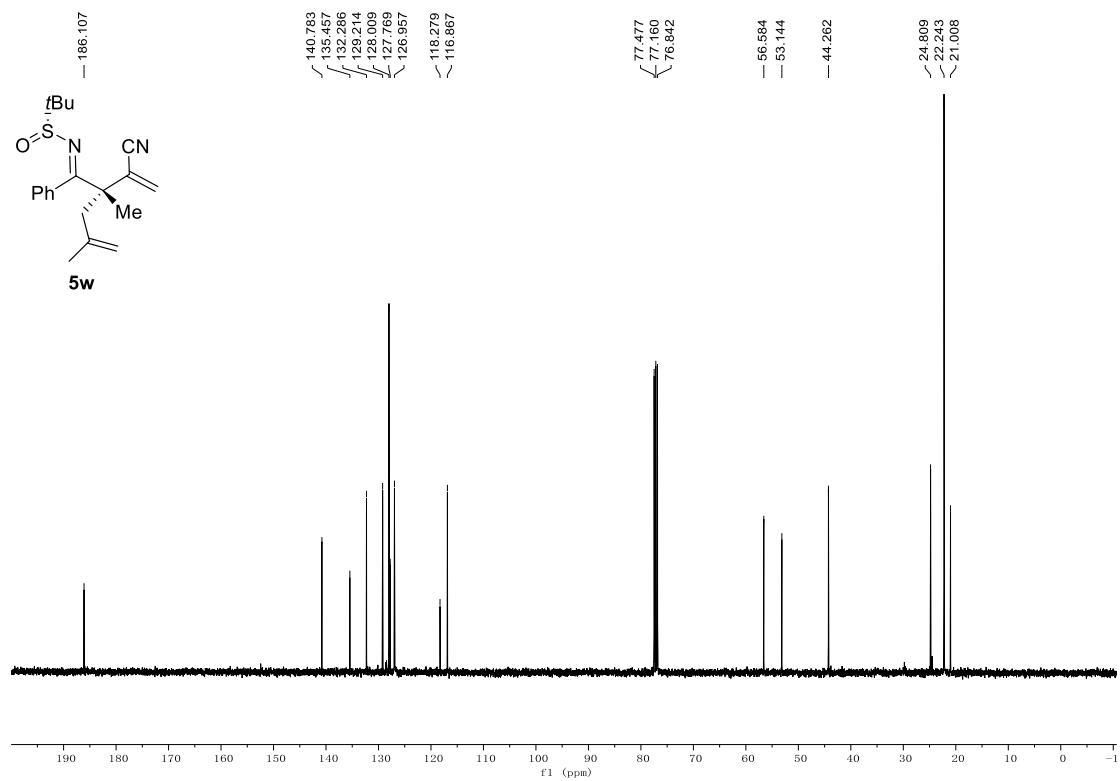

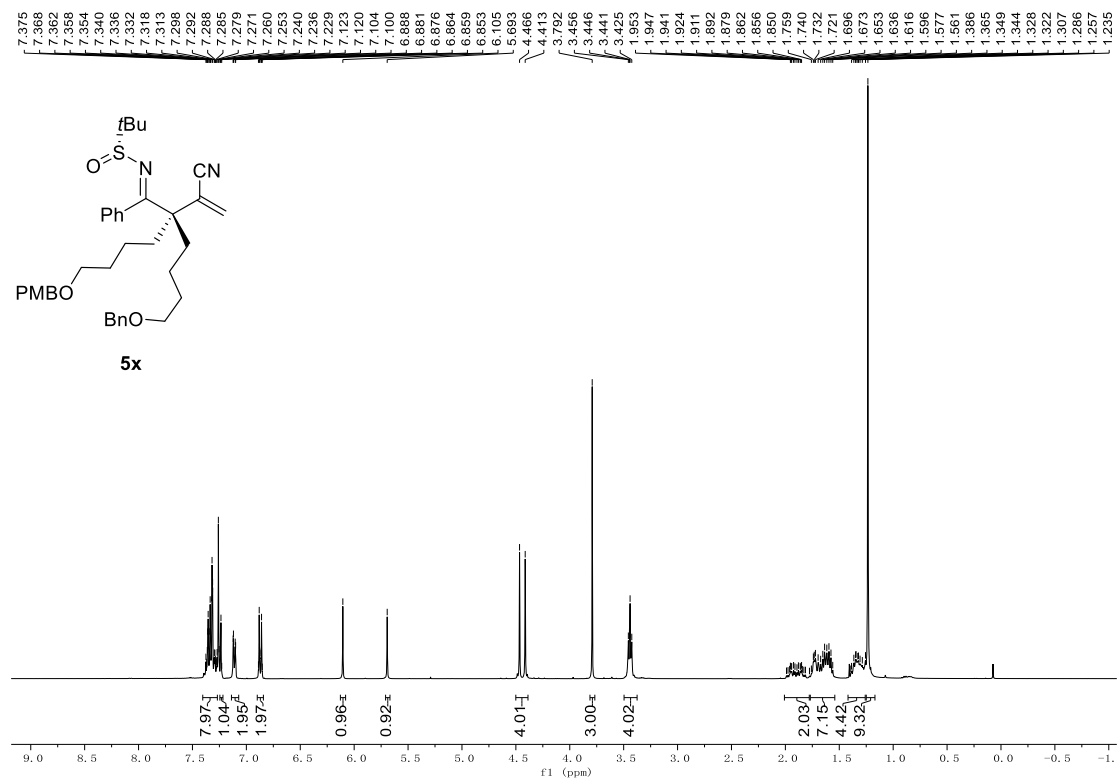

<sup>1</sup>H NMR spectrum (CDCl<sub>3</sub>, 400 MHz) of 5x

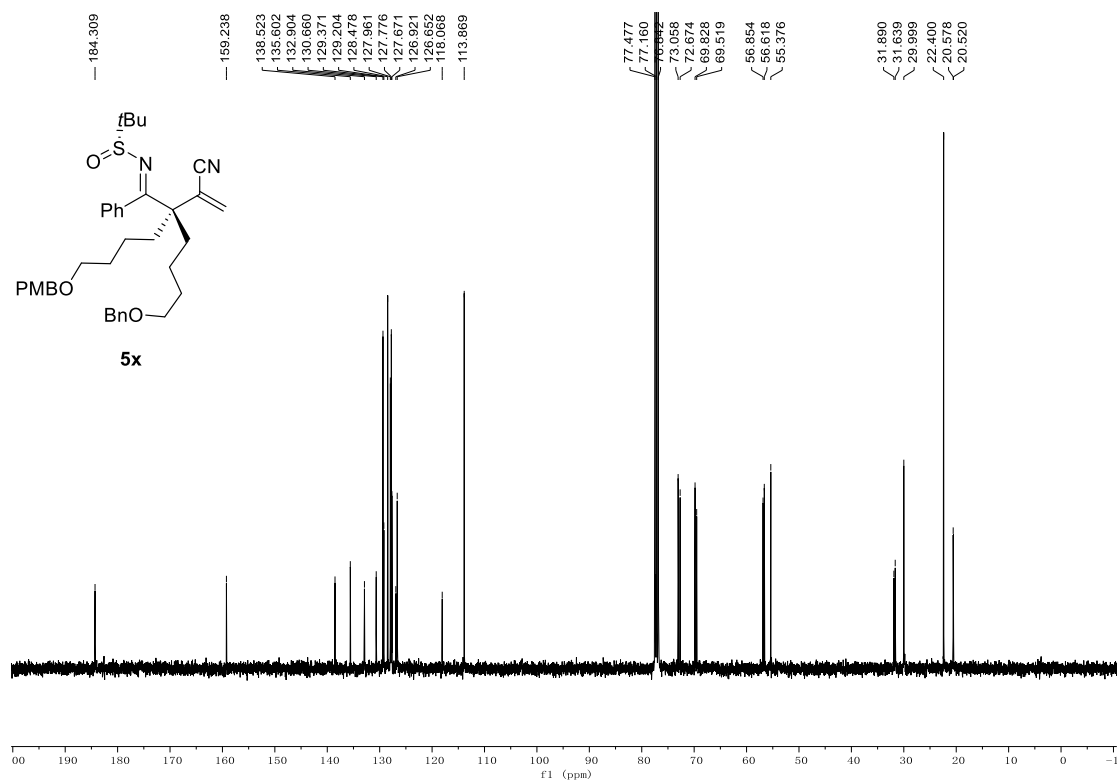

<sup>13</sup>C NMR spectrum (CDCl<sub>3</sub>, 100 MHz) of 5x

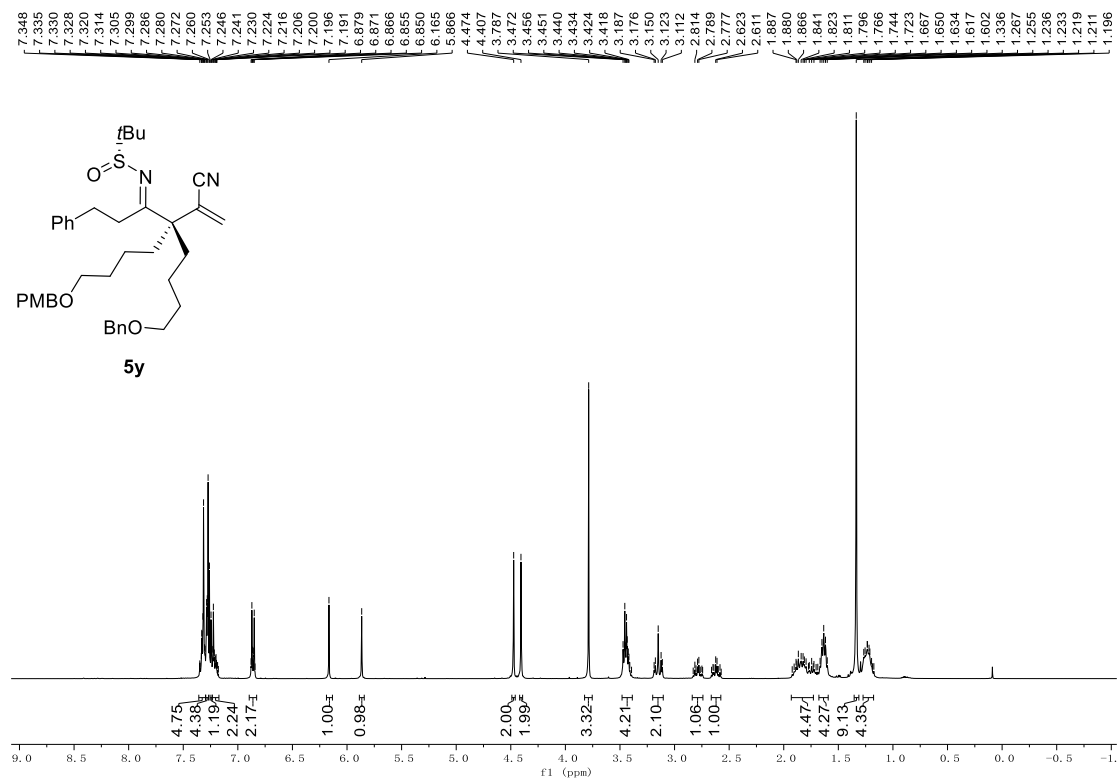

**<sup>1</sup>H NMR spectrum (CDCl<sub>3</sub>, 400 MHz) of **5y****

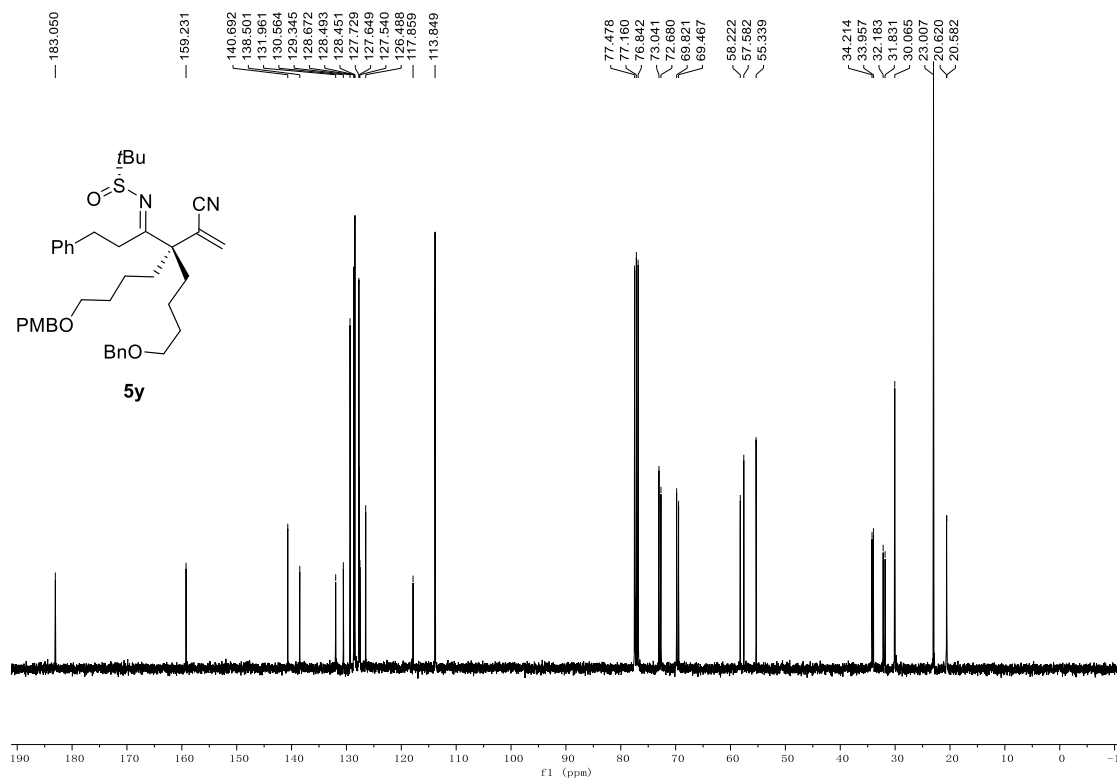

**<sup>13</sup>C NMR spectrum (CDCl<sub>3</sub>, 100 MHz) of **5y****

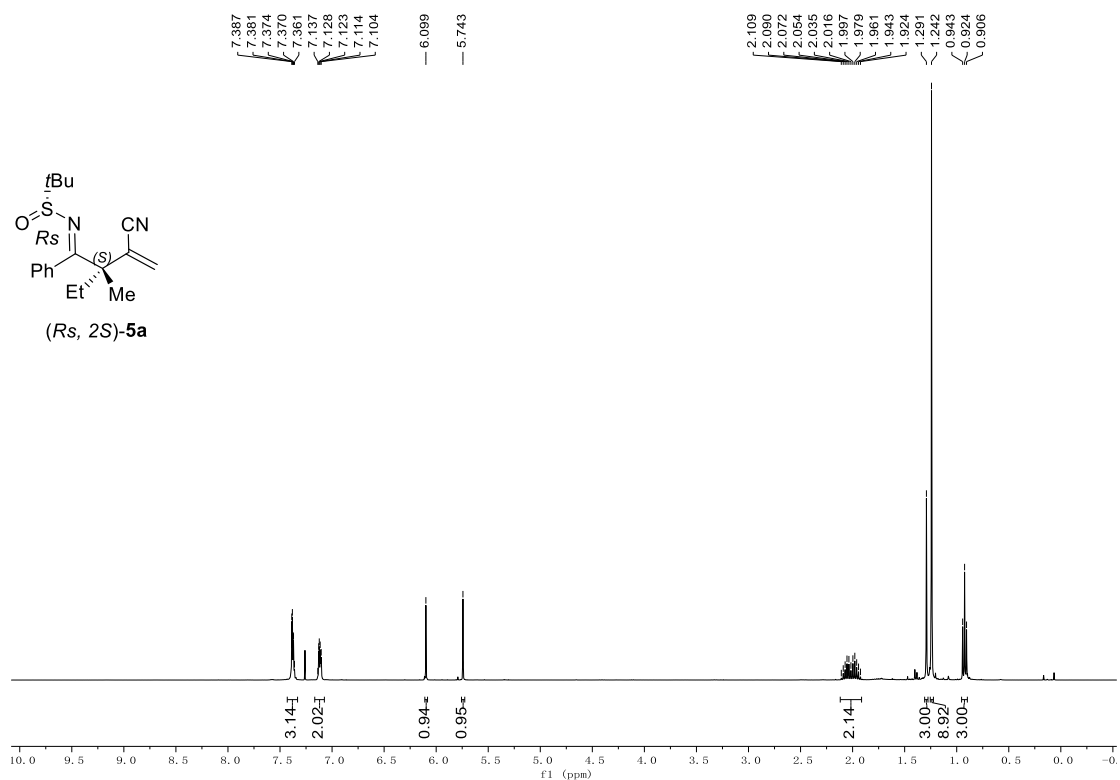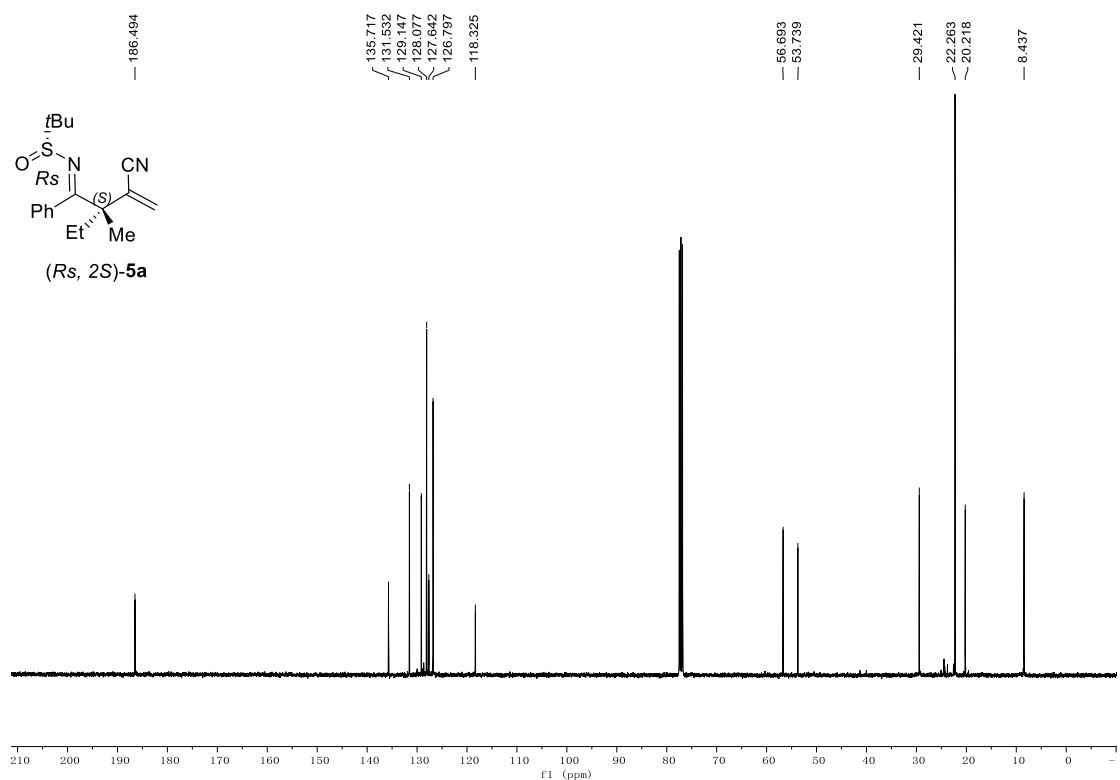

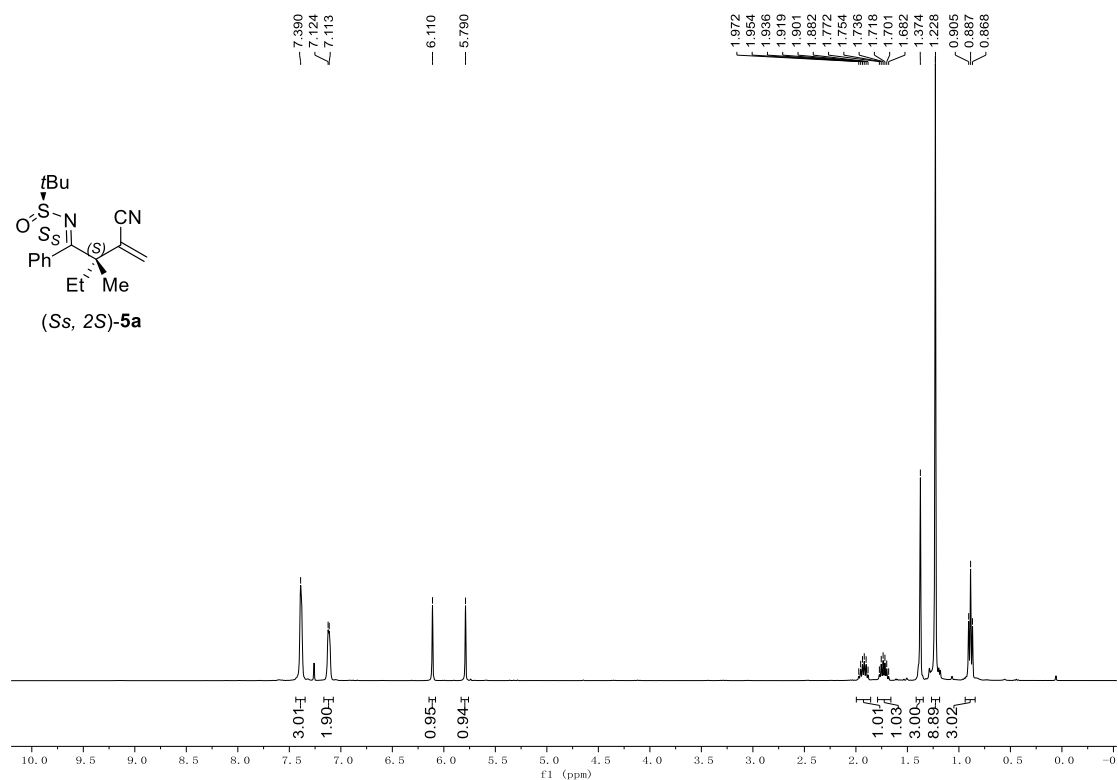

<sup>1</sup>H NMR spectrum (CDCl<sub>3</sub>, 400 MHz) of **(Ss, 2S)-5a** prepared from  $\alpha$ -alkenylation of enantioenriched ketimines (Scheme 5)

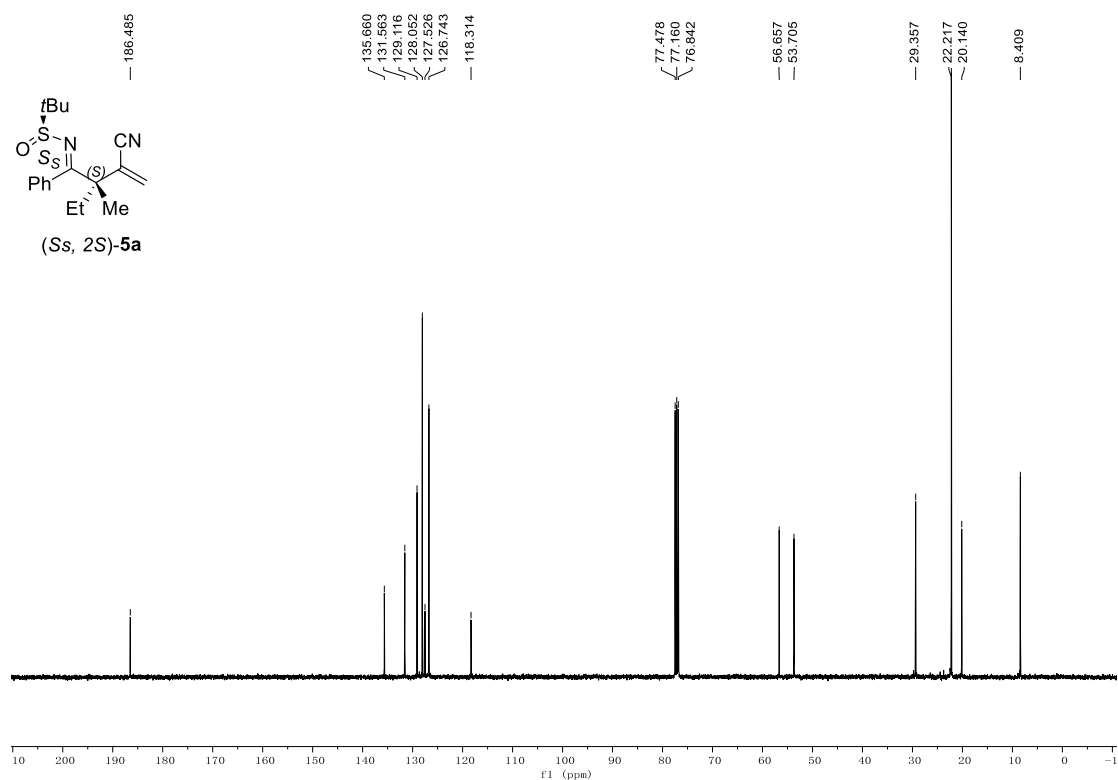

<sup>13</sup>C NMR spectrum (CDCl<sub>3</sub>, 100 MHz) of **(Ss, 2S)-5a** prepared from  $\alpha$ -alkenylation of enantioenriched ketimines (Scheme 5)

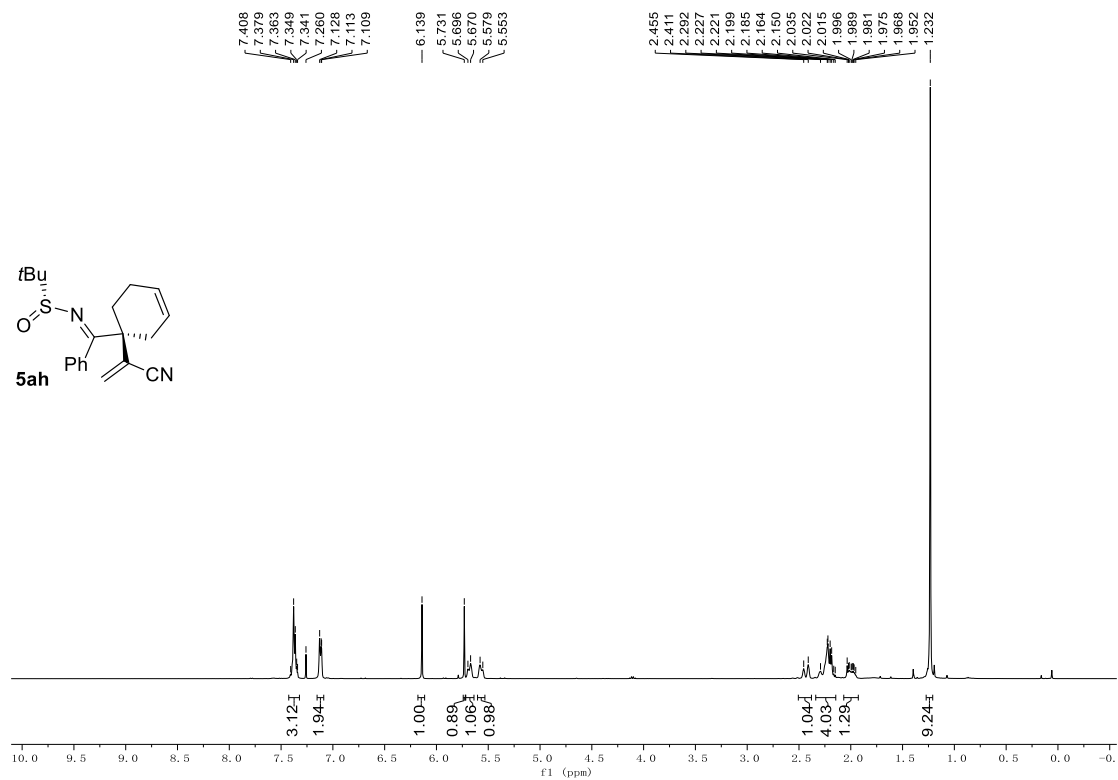

$^1\text{H}$  NMR spectrum ( $\text{CDCl}_3$ , 400 MHz) of **5ah**

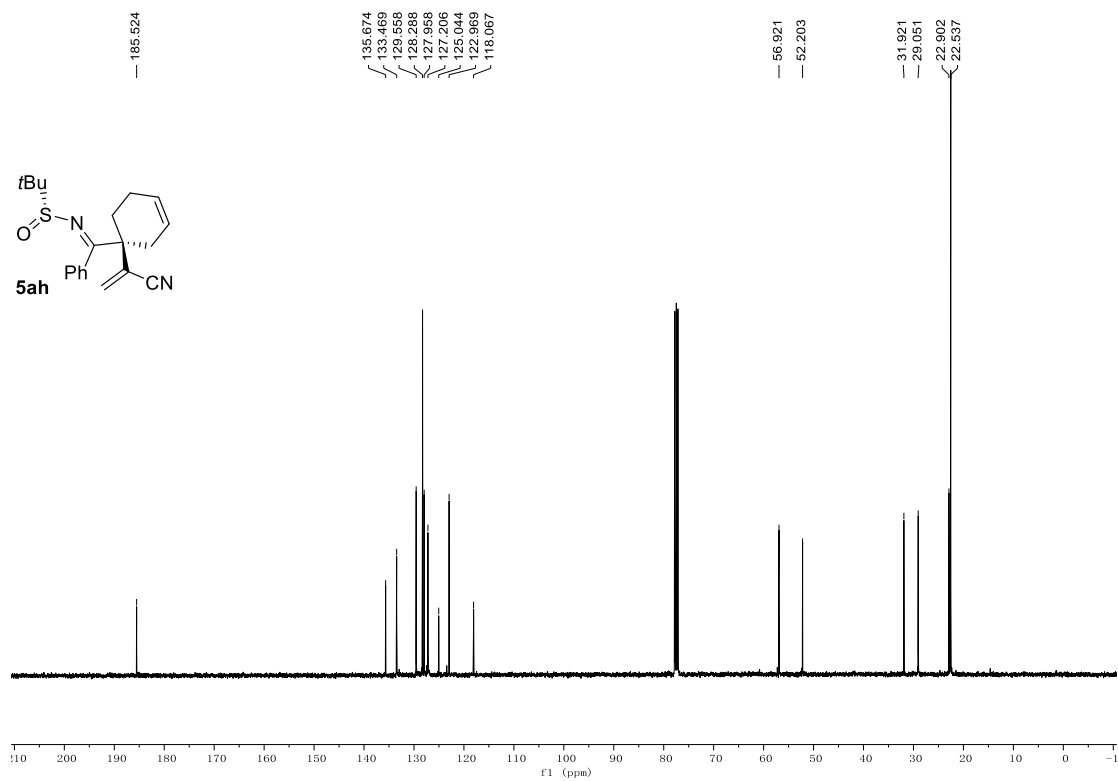

$^{13}\text{C}$  NMR spectrum ( $\text{CDCl}_3$ , 100 MHz) of **5ah**

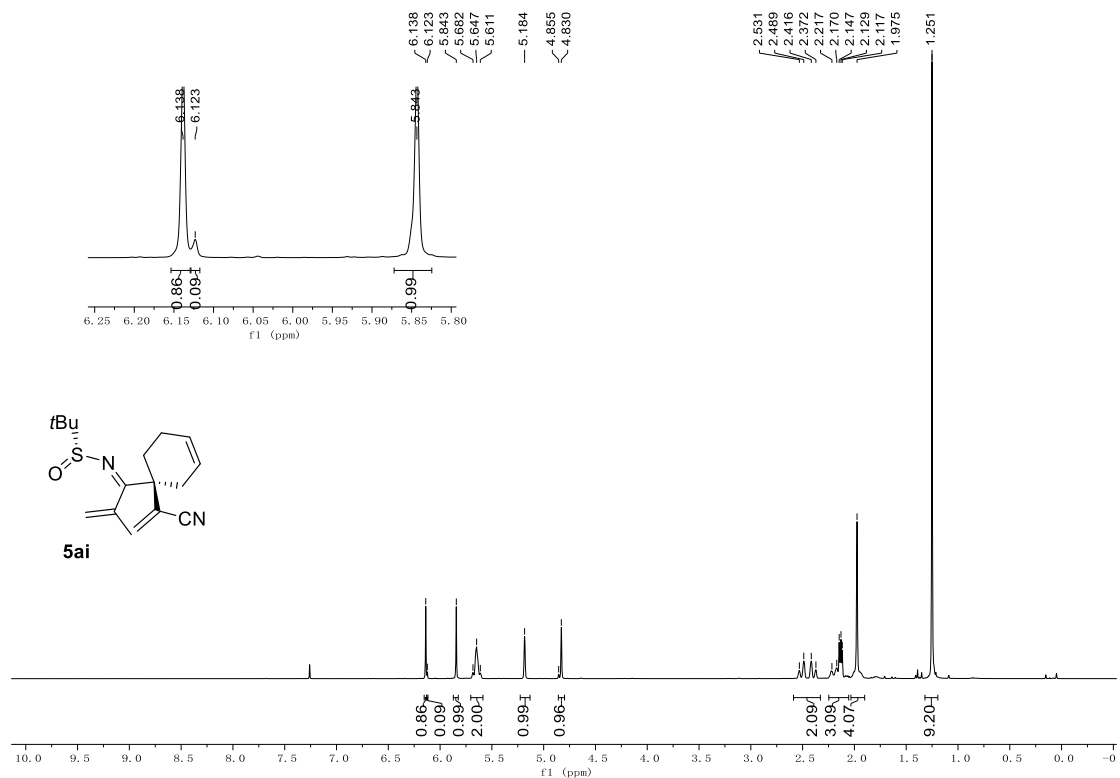

<sup>1</sup>H NMR spectrum (CDCl<sub>3</sub>, 400 MHz) of 5ai

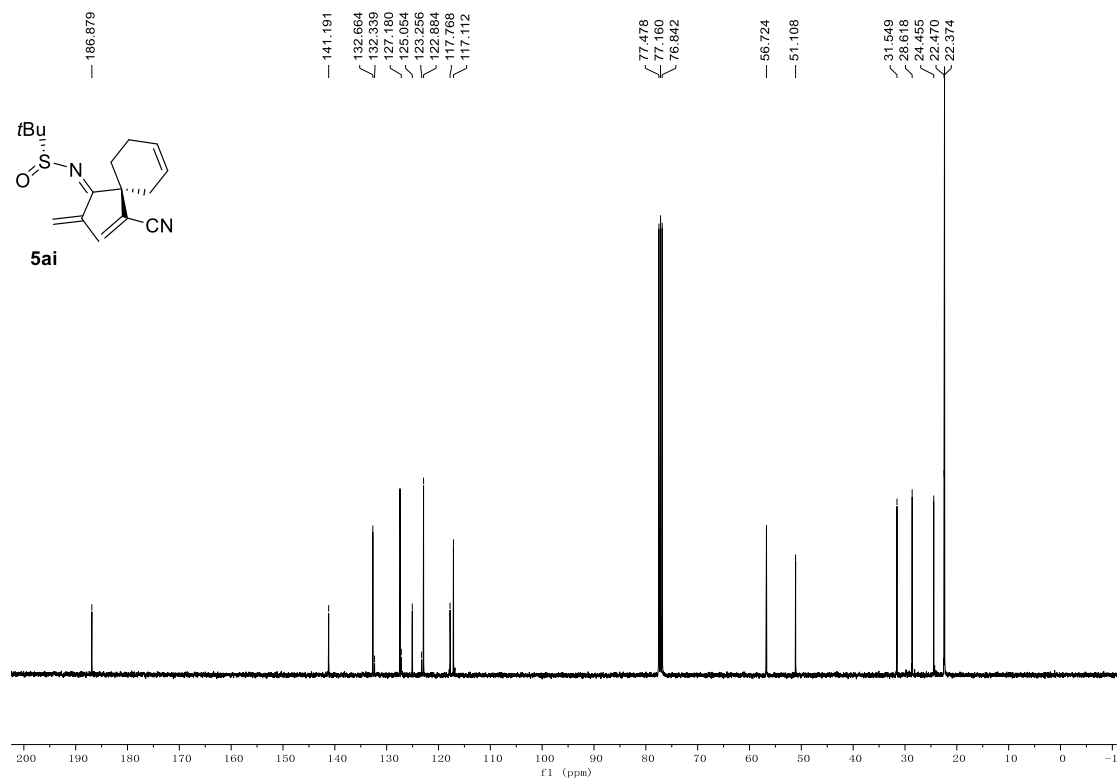

<sup>13</sup>C NMR spectrum (CDCl<sub>3</sub>, 100 MHz) of 5ai

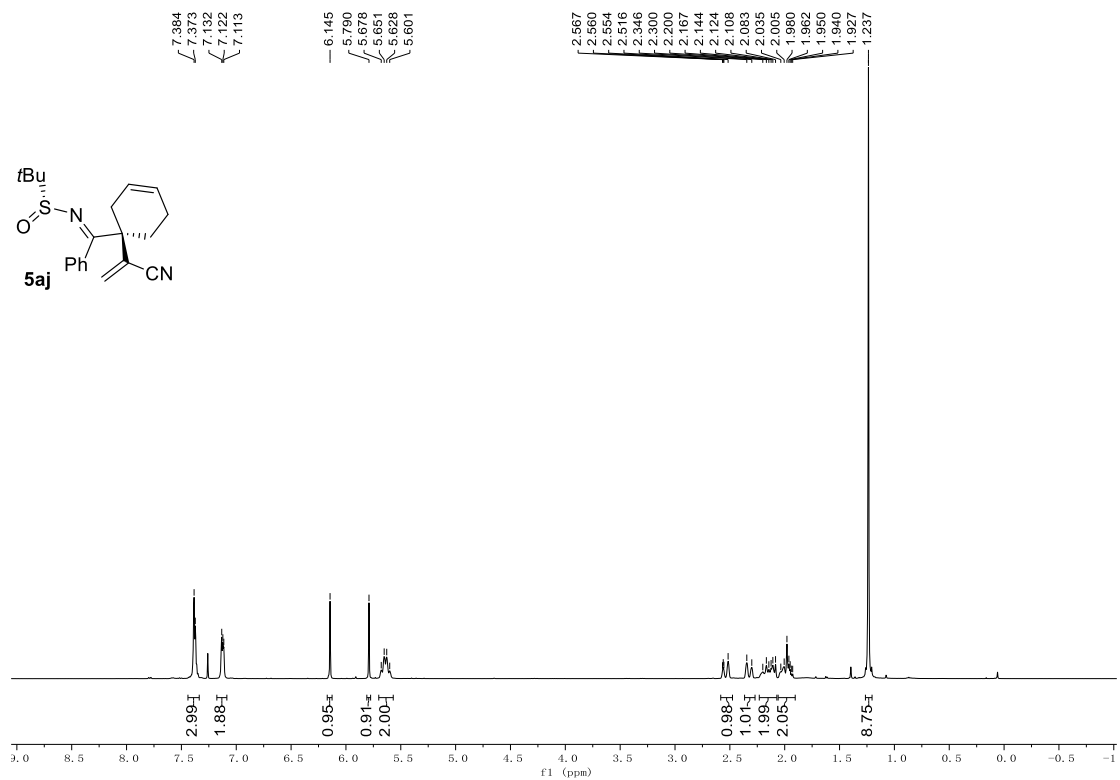

$^1\text{H}$  NMR spectrum ( $\text{CDCl}_3$ , 400 MHz) of **5aj**

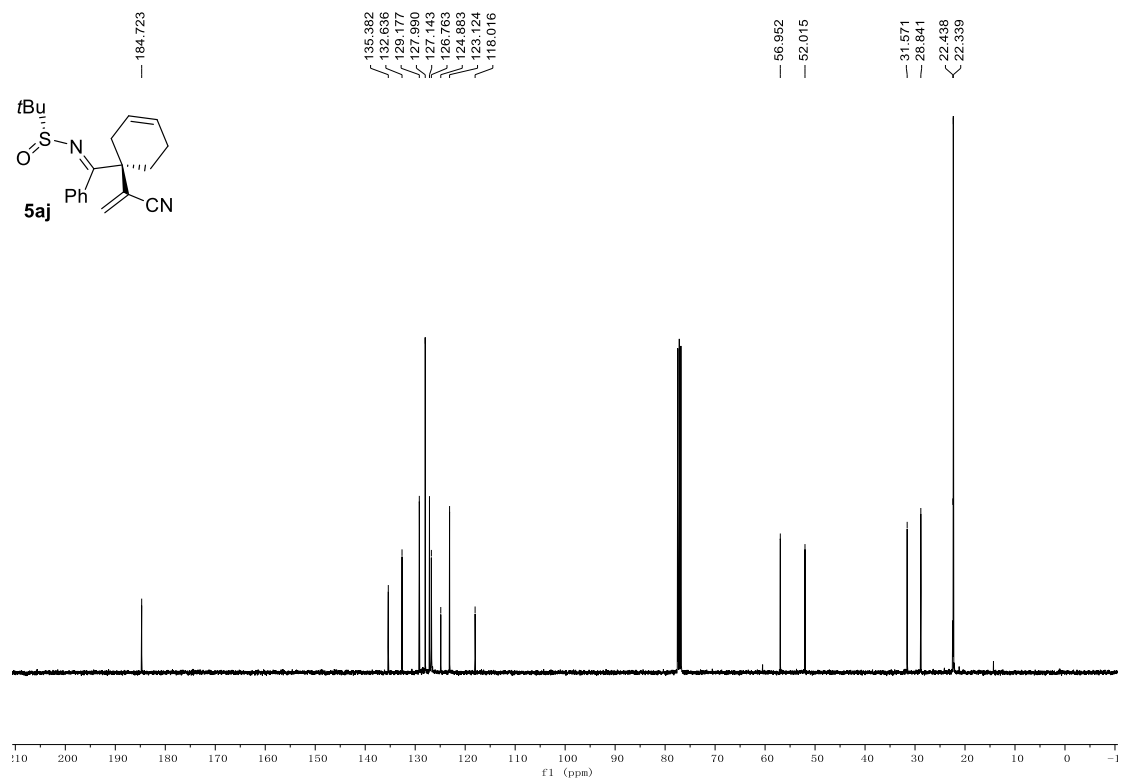

$^{13}\text{C}$  NMR spectrum ( $\text{CDCl}_3$ , 100 MHz) of **5aj**



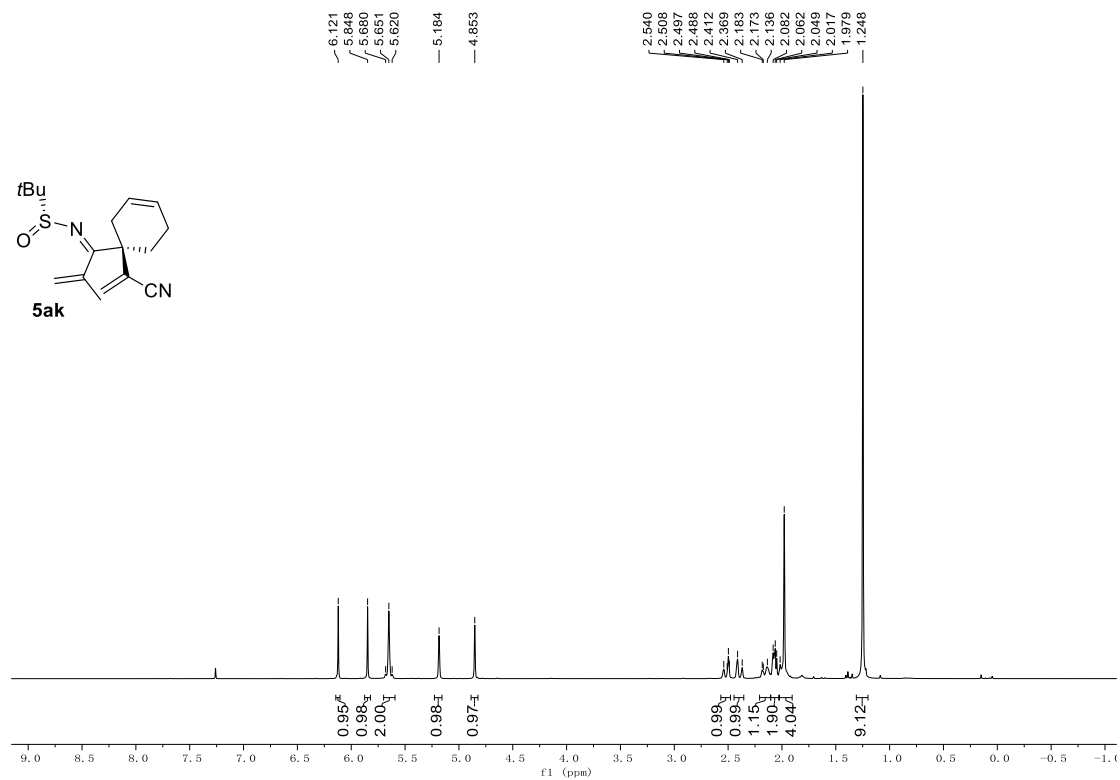

$^1\text{H}$  NMR spectrum ( $\text{CDCl}_3$ , 400 MHz) of **5ak**

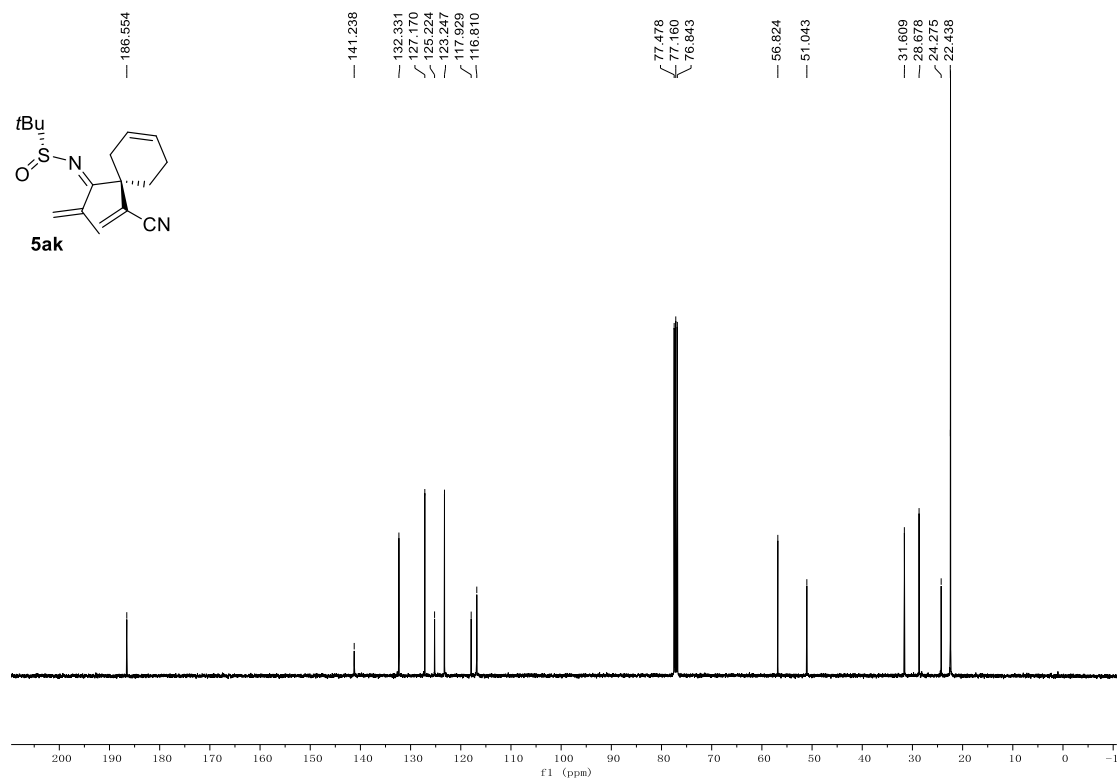

$^{13}\text{C}$  NMR spectrum ( $\text{CDCl}_3$ , 100 MHz) of **5ak**

## Determination of dr by $^1\text{H}$ NMR or HPLC analysis of the crude products

Note: In most cases, in order to identify the diagnostic peak(s) for the minor diastereomer from the  $^1\text{H}$  NMR spectrum of the crude reaction mixture generated from the reaction using one geometric isomer (*Z/E* or *Z/E* > 100:1) of the enesulfonamides as the starting material, reaction were intentionally performed under identical conditions using the enesulfonamides with low ratio of geometric isomer (for details of preparing enesulfonamides with high or low ratio of geometric isomers, see ref S2), which gave a pair of diastereomers of the alkenylation products with low dr. The  $^1\text{H}$  NMR spectra of the alkenylation product with low dr was recorded and used as a reference spectrum.

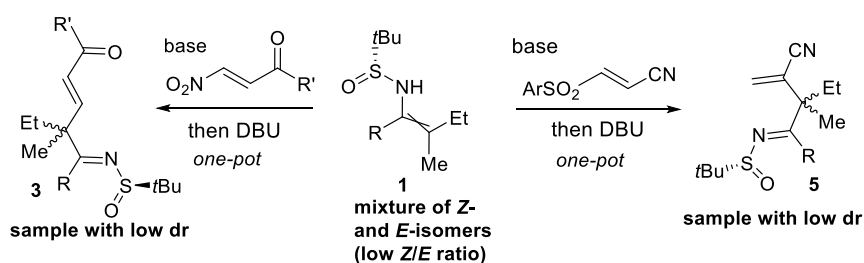

In some cases, determination of dr with  $^1\text{H}$  NMR spectrum of the crude reaction mixture was not possible since the  $^1\text{H}$  NMR spectra of the diastereomers in these cases are nearly identical. Instead, HPLC analysis of the crude reaction mixture was used to determine dr. For details, please see the pages S147–S224.

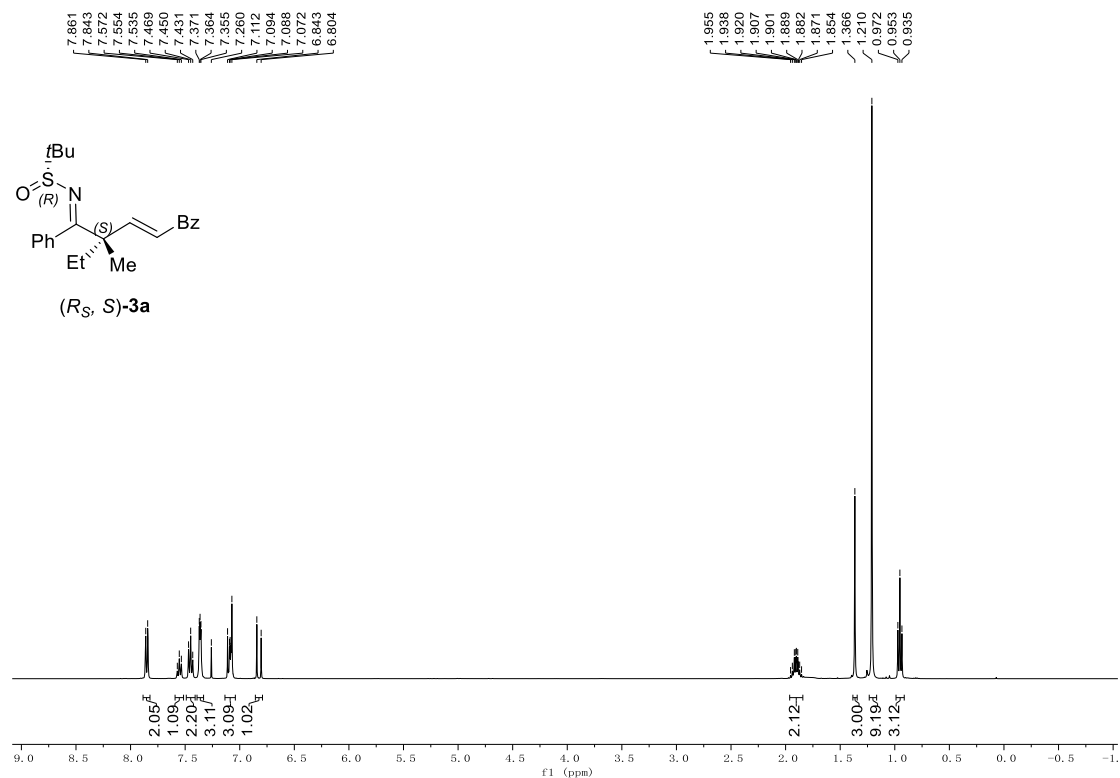

$^1\text{H}$  NMR spectrum ( $\text{CDCl}_3$ , 400 MHz) of the diastereomer  $(R_S, S)$ -**3a** that was used to identify the diagnostic peak(s) of the minor diastereomer

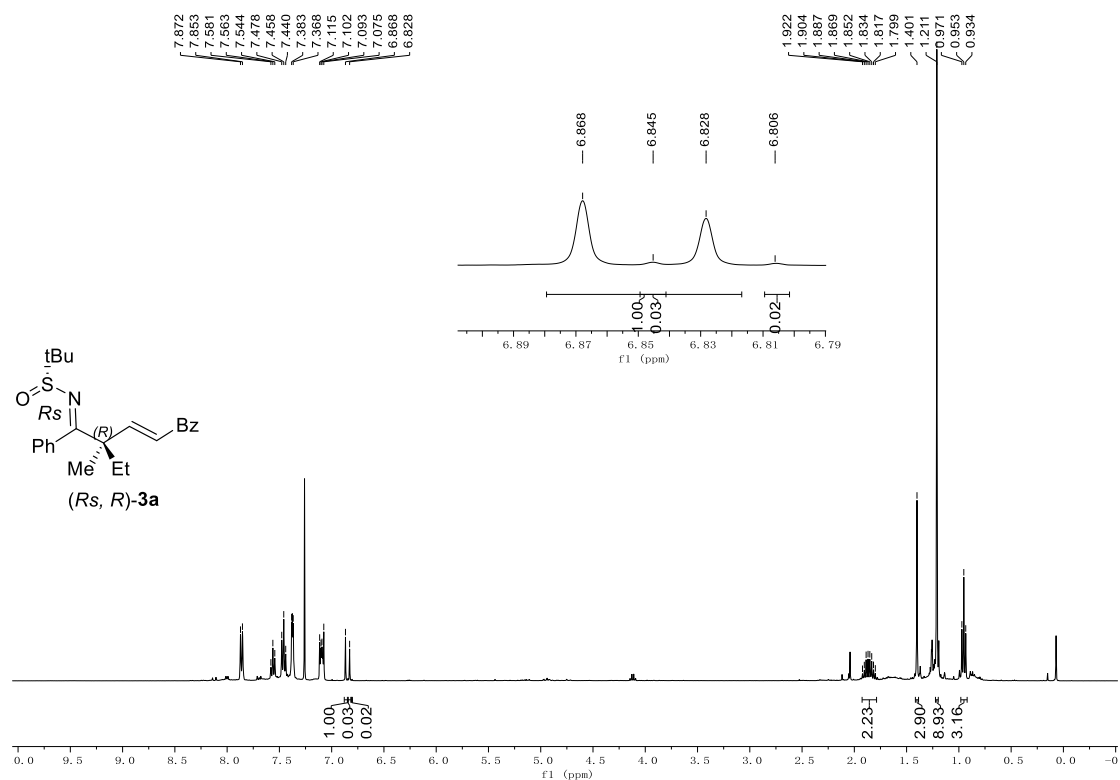

$^1\text{H}$  NMR spectrum ( $\text{CDCl}_3$ , 400 MHz) of the crude reaction mixture of  $(R_S, R)$ -**3a** (dr > 20:1; 1 gram scale reaction)



<sup>1</sup>H NMR spectrum (CDCl<sub>3</sub>, 400 MHz) of the diastereomer (*R<sub>S</sub>*, *S*)-**3a** that was used to identify the diagnostic peak(s) of the minor diastereomer

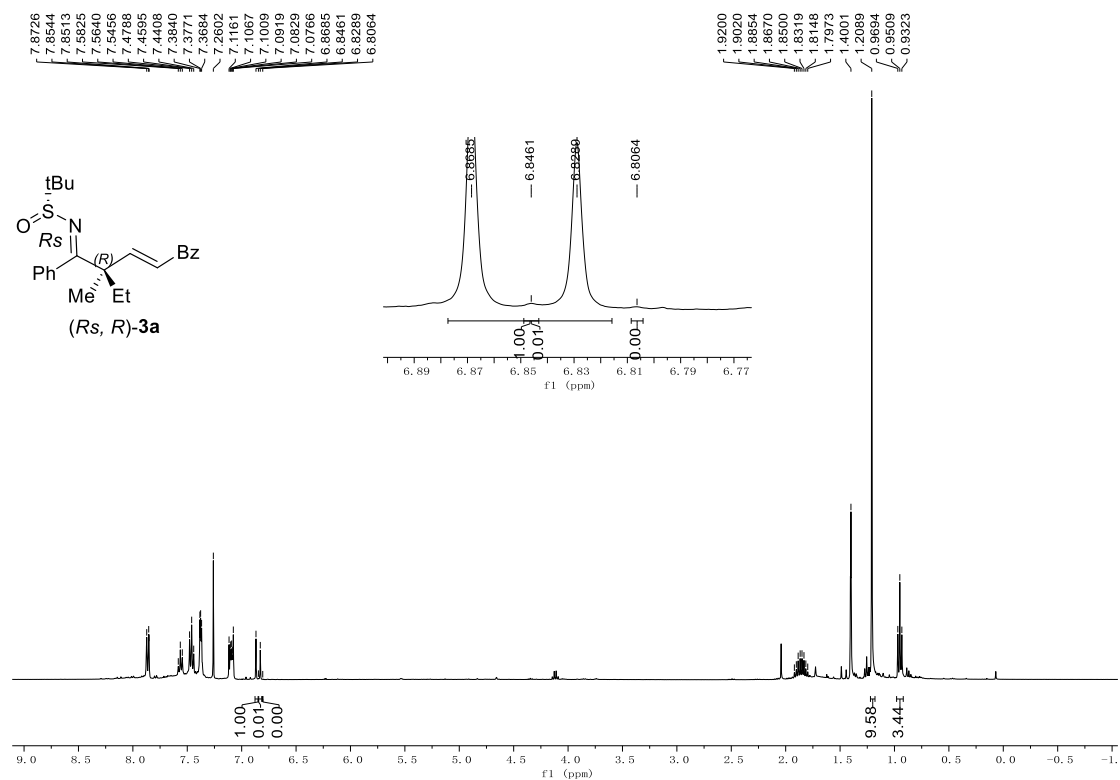

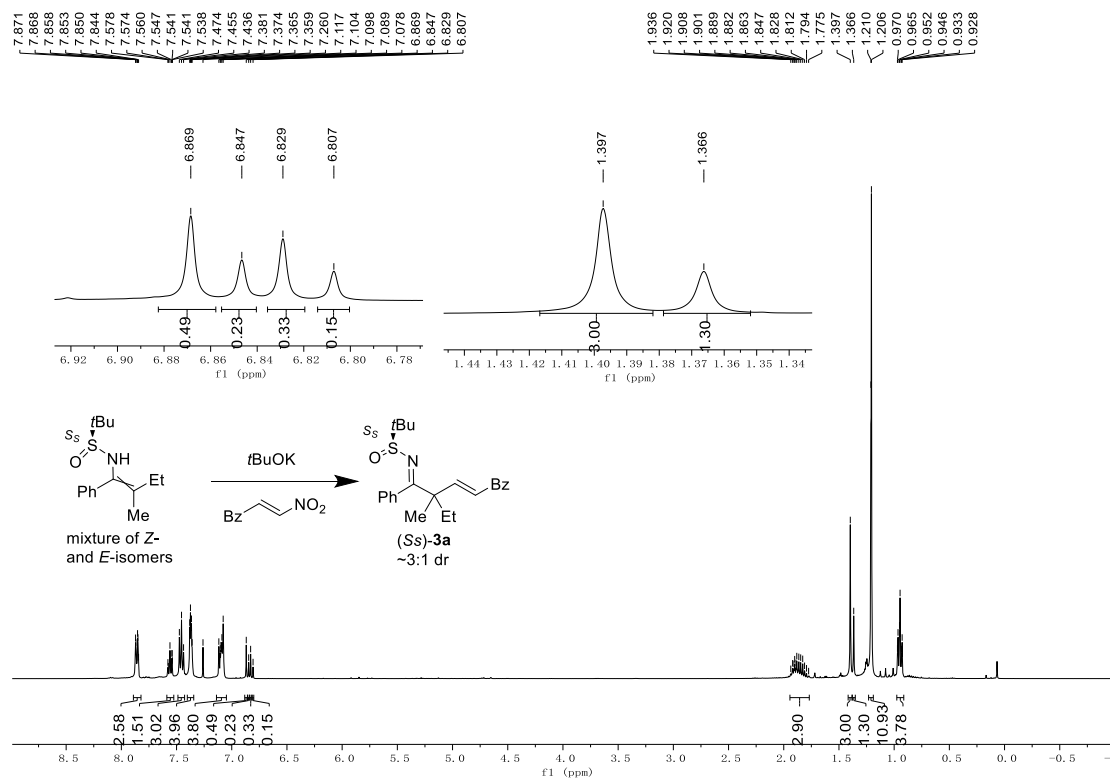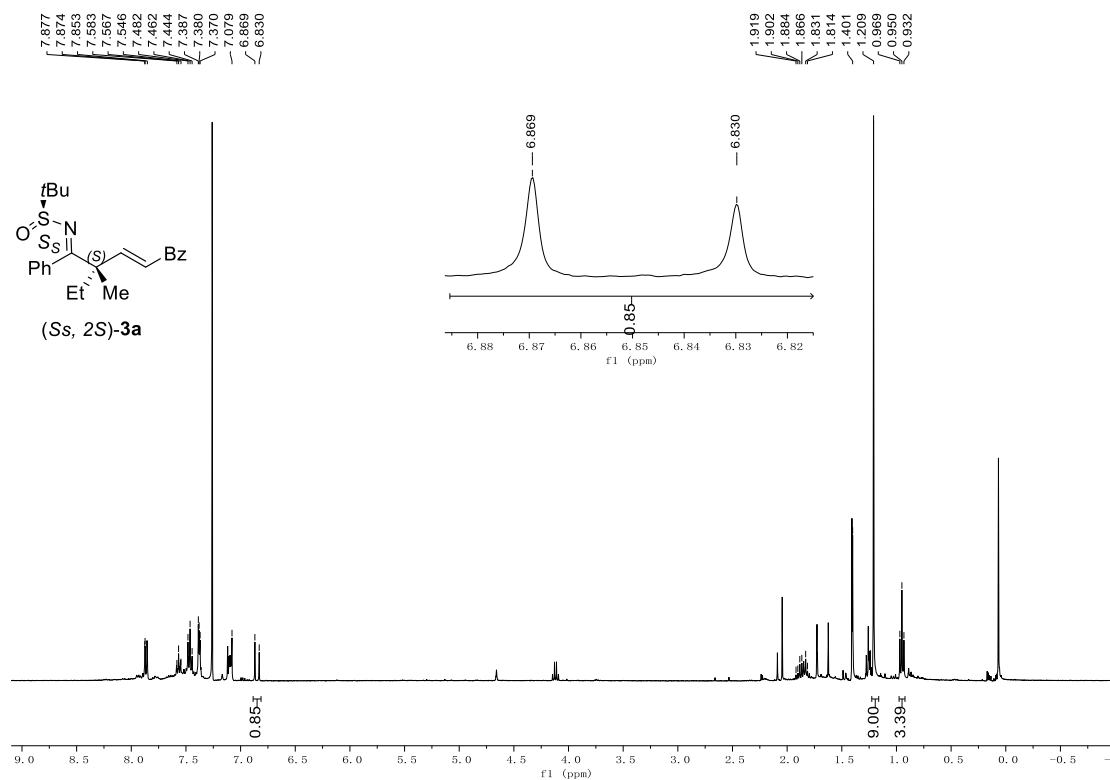

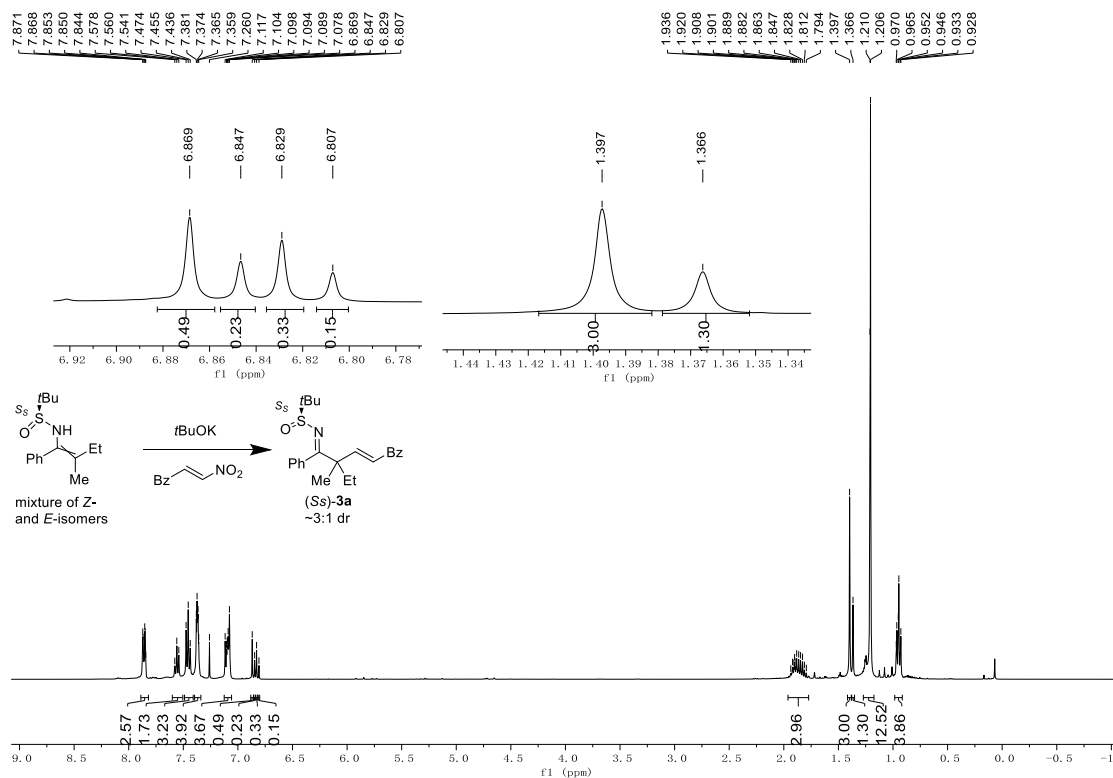

<sup>1</sup>H NMR spectrum (CDCl<sub>3</sub>, 400 MHz) of **(Ss)-3a** with low diastereoselectivity (dr ~ 3:1) intentionally prepared using the corresponding enesulfonamide sample with low *Z/E* ratio

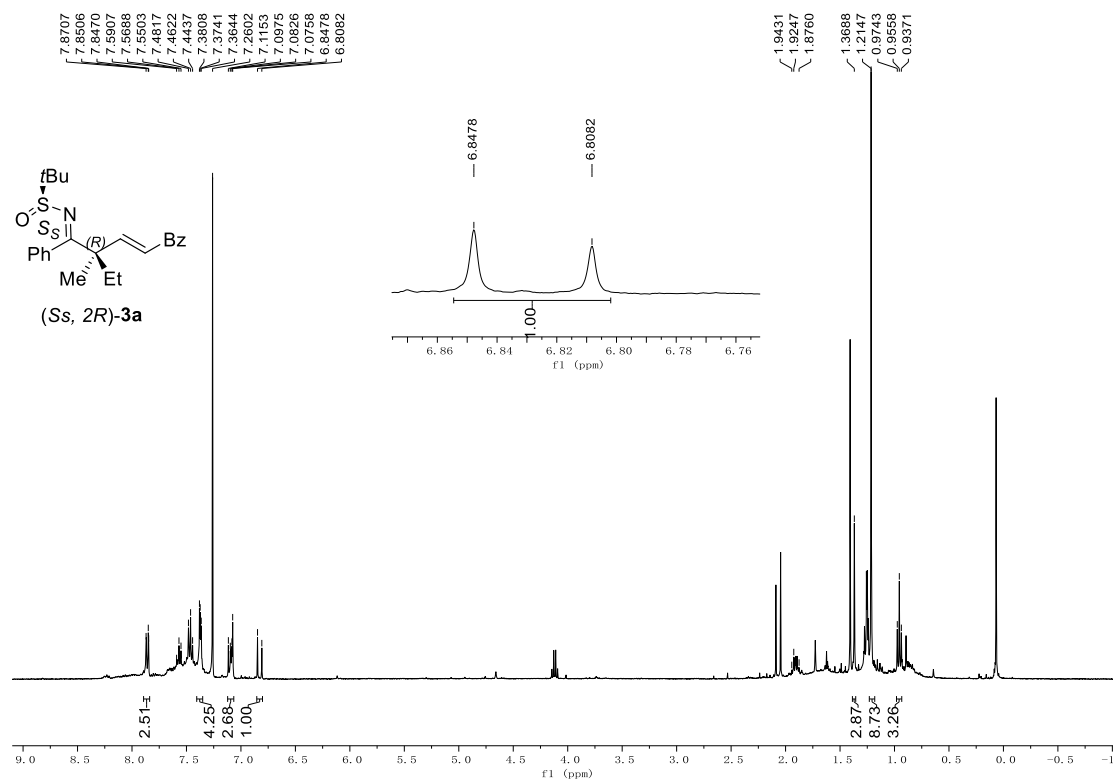

<sup>1</sup>H NMR spectrum (CDCl<sub>3</sub>, 400 MHz) of the crude reaction mixture of **(Ss, R)-3a** (dr >20:1) (No observable presence of the minor diastereomer)

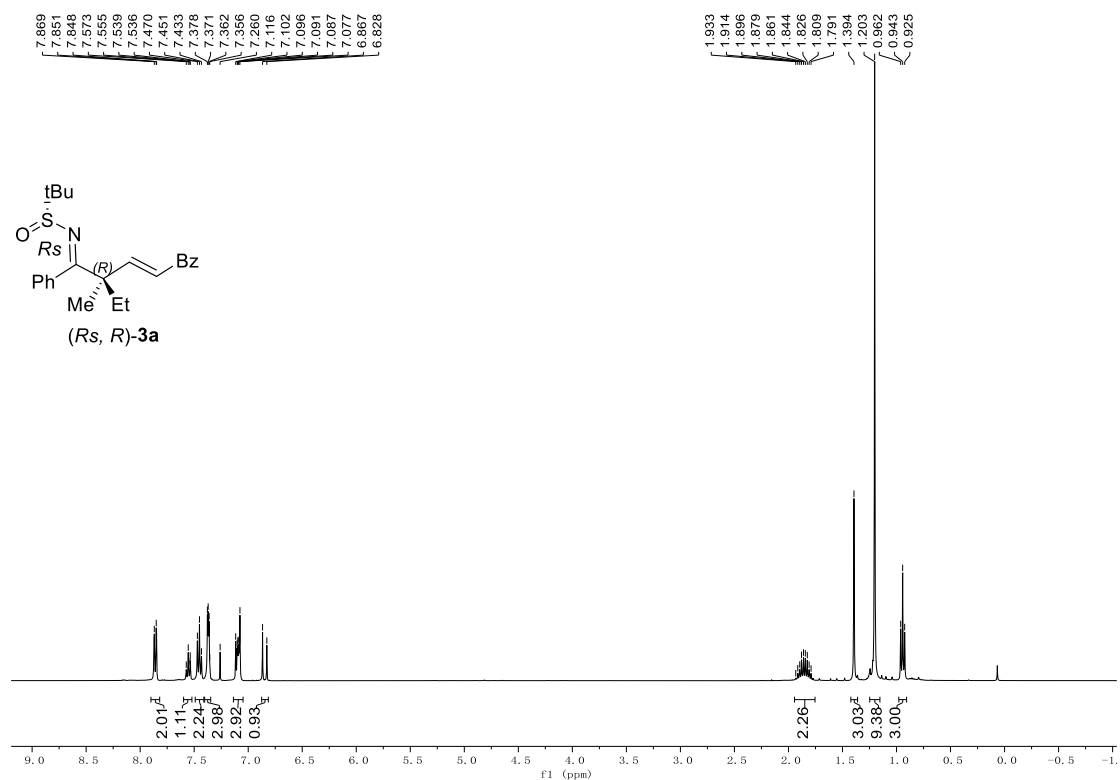

<sup>1</sup>H NMR spectrum (CDCl<sub>3</sub>, 400 MHz) of the diastereomer (*R*<sub>s</sub>, *R*)-3a that was used to identify the diagnostic peak(s) of the minor diastereomer

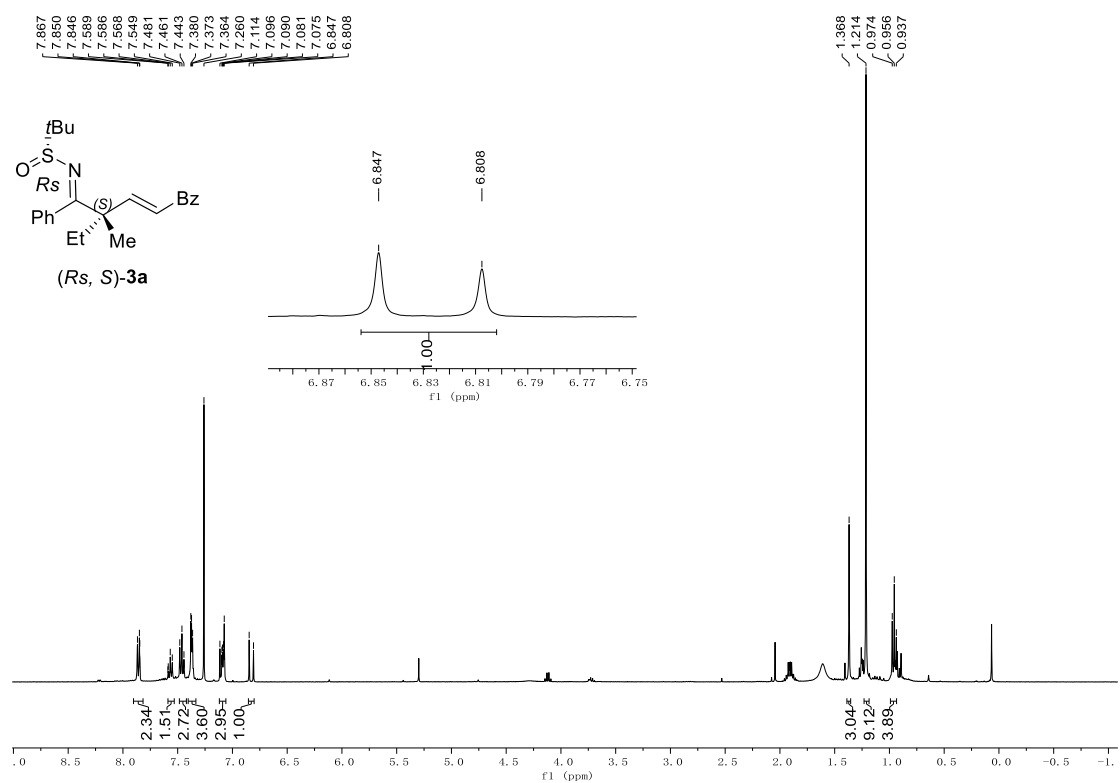

<sup>1</sup>H NMR spectrum (CDCl<sub>3</sub>, 400 MHz) of the crude reaction mixture of (*R*<sub>s</sub>, *S*)-3a (dr > 20:1)  
(No observable presence of the minor diastereomer)

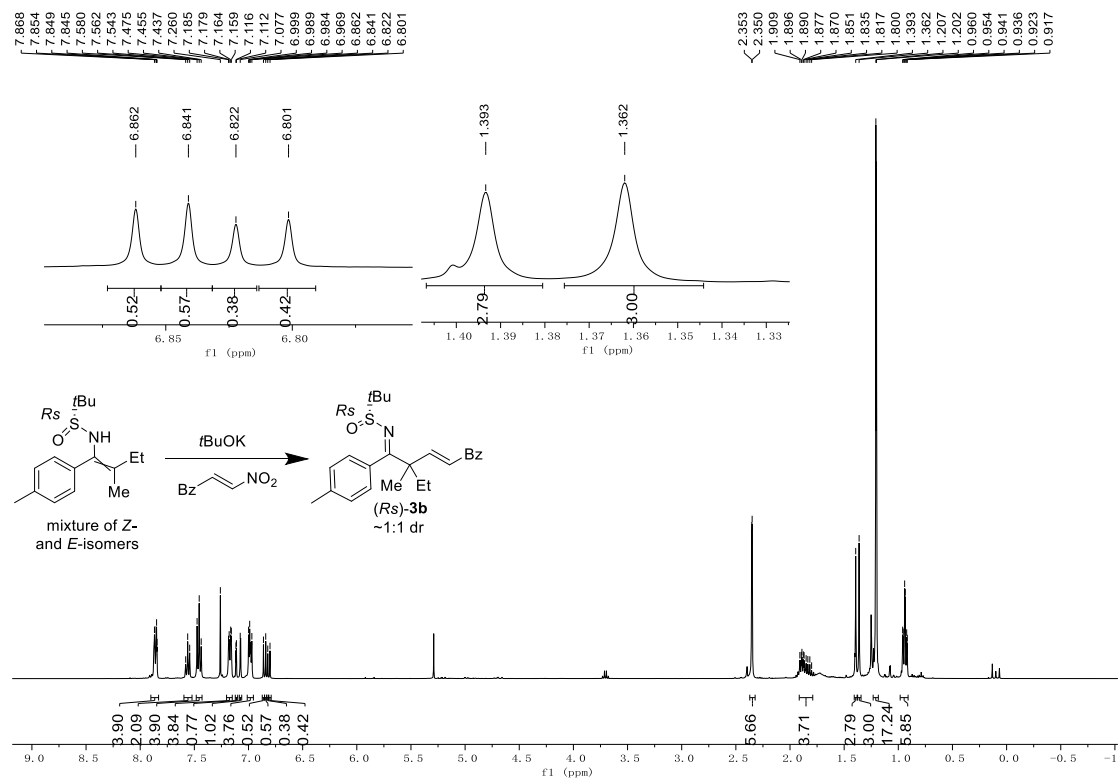

$^1\text{H NMR}$  spectrum ( $\text{CDCl}_3$ , 400 MHz) of **(*R<sub>s</sub>*)-3b** with low diastereoselectivity (dr  $\sim 1:1$ ) intentionally prepared using the corresponding enesulfonamide sample with low *Z/E* ratio

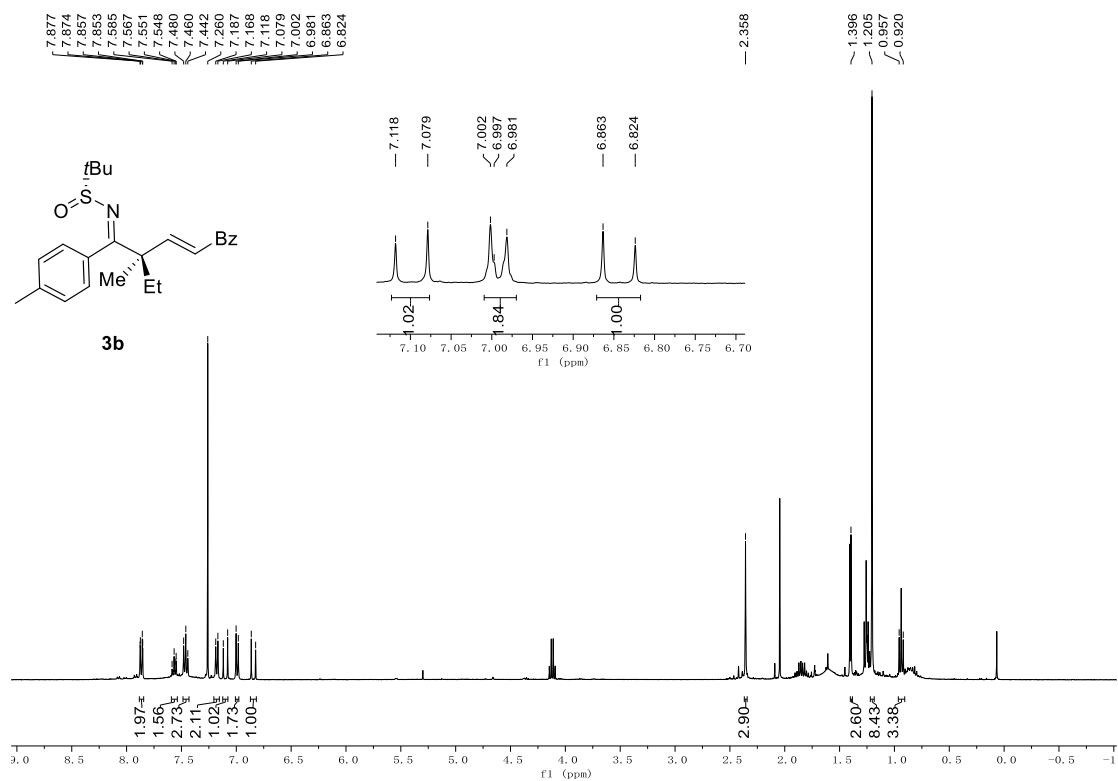

$^1\text{H NMR}$  spectrum ( $\text{CDCl}_3$ , 400 MHz) of the crude reaction mixture of **3b** (dr  $> 20:1$ ) (No observable presence of the minor diastereomer)



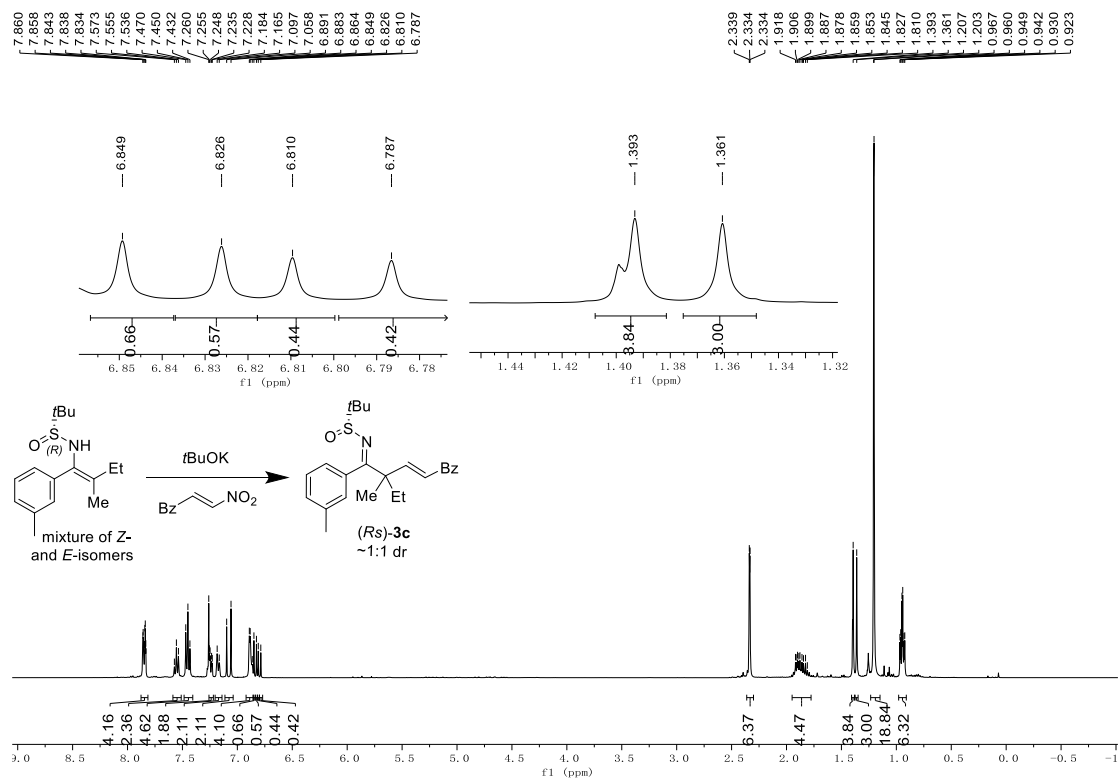

<sup>1</sup>H NMR spectrum (CDCl<sub>3</sub>, 400 MHz) of *(R<sub>s</sub>)-3c* with low diastereoselectivity (dr ~ 1:1) intentionally prepared using the corresponding enesulfonamide sample with low *Z/E* ratio

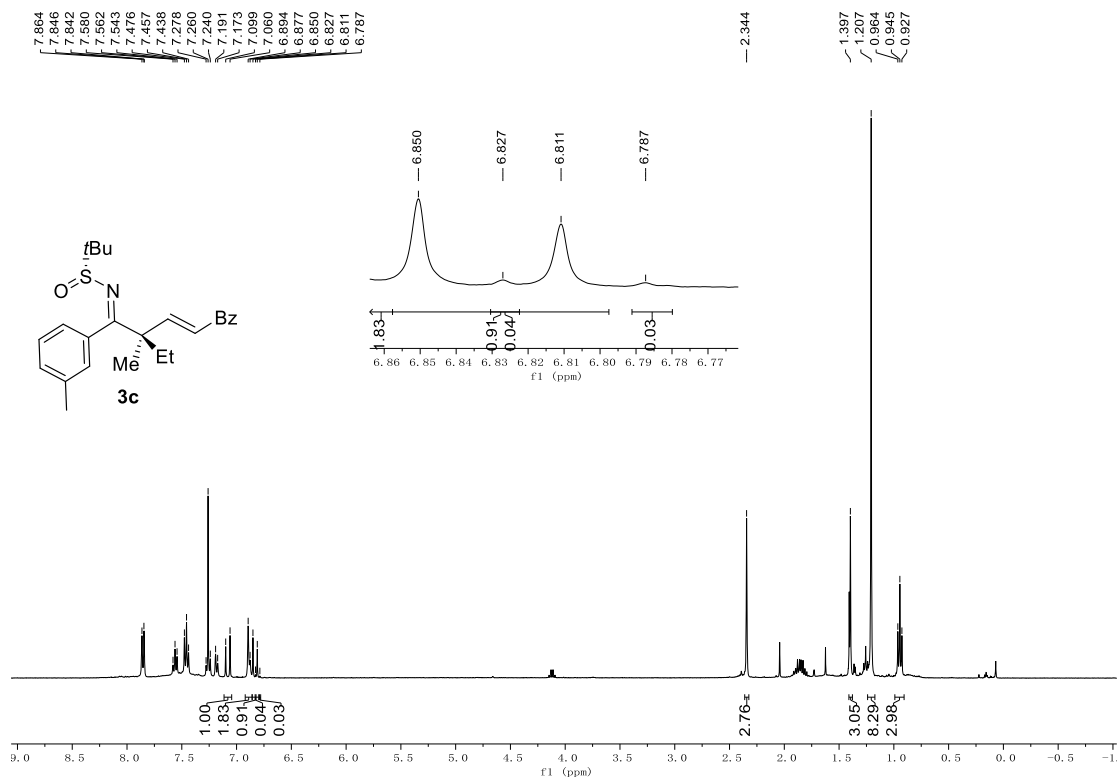

<sup>1</sup>H NMR spectrum (CDCl<sub>3</sub>, 400 MHz) of the crude reaction mixture of *3c* (dr = 20:1)

(*R*)-**3d**: HPLC conditions: Daicel Chiralcel IA-3 column, *n*-hexane/2-propanol = 90:10 (v/v), 1.0 mL/min, 254 nm, 40 °C.

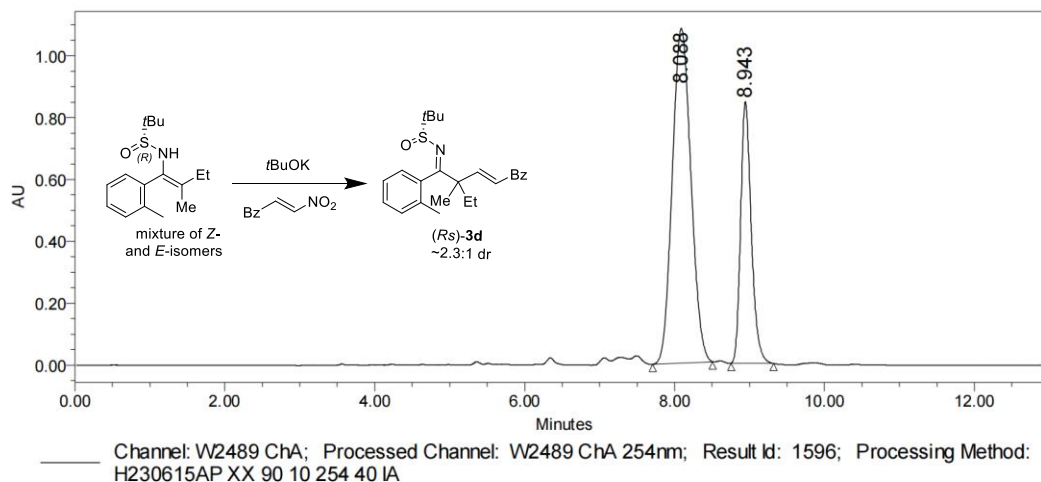

**Processed Channel Descr.: W2489 ChA 254nm**

|   | Processed Channel Descr. | RT    | Area     | % Area | Height  |
|---|--------------------------|-------|----------|--------|---------|
| 1 | W2489 ChA 254nm          | 8.088 | 18718381 | 69.19  | 1082313 |
| 2 | W2489 ChA 254nm          | 8.943 | 8334701  | 30.81  | 846234  |

HPLC chromatogram for dr determination of crude **3d**

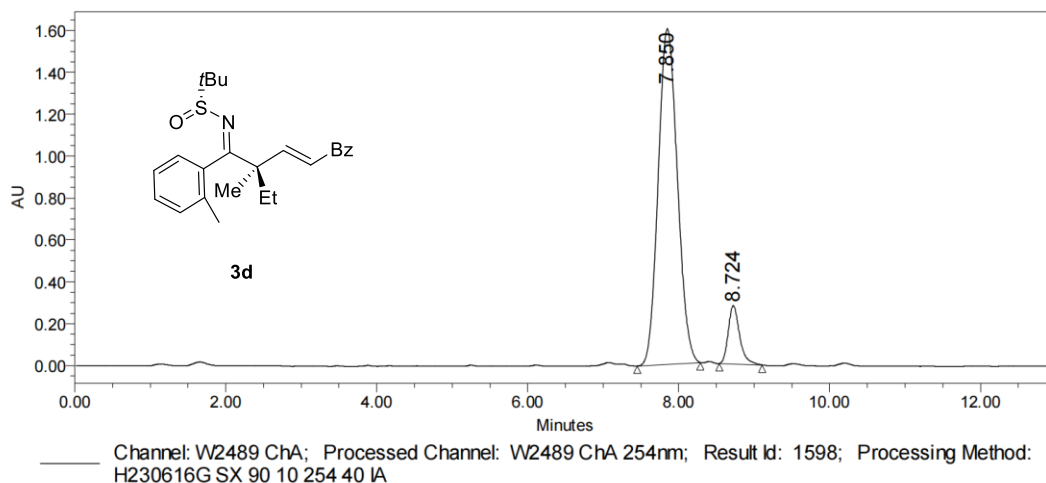

**Processed Channel Descr.: W2489 ChA 254nm**

|   | Processed Channel Descr. | RT    | Area     | % Area | Height  |
|---|--------------------------|-------|----------|--------|---------|
| 1 | W2489 ChA 254nm          | 7.850 | 28296789 | 90.66  | 1602552 |
| 2 | W2489 ChA 254nm          | 8.724 | 2916232  | 9.34   | 278385  |

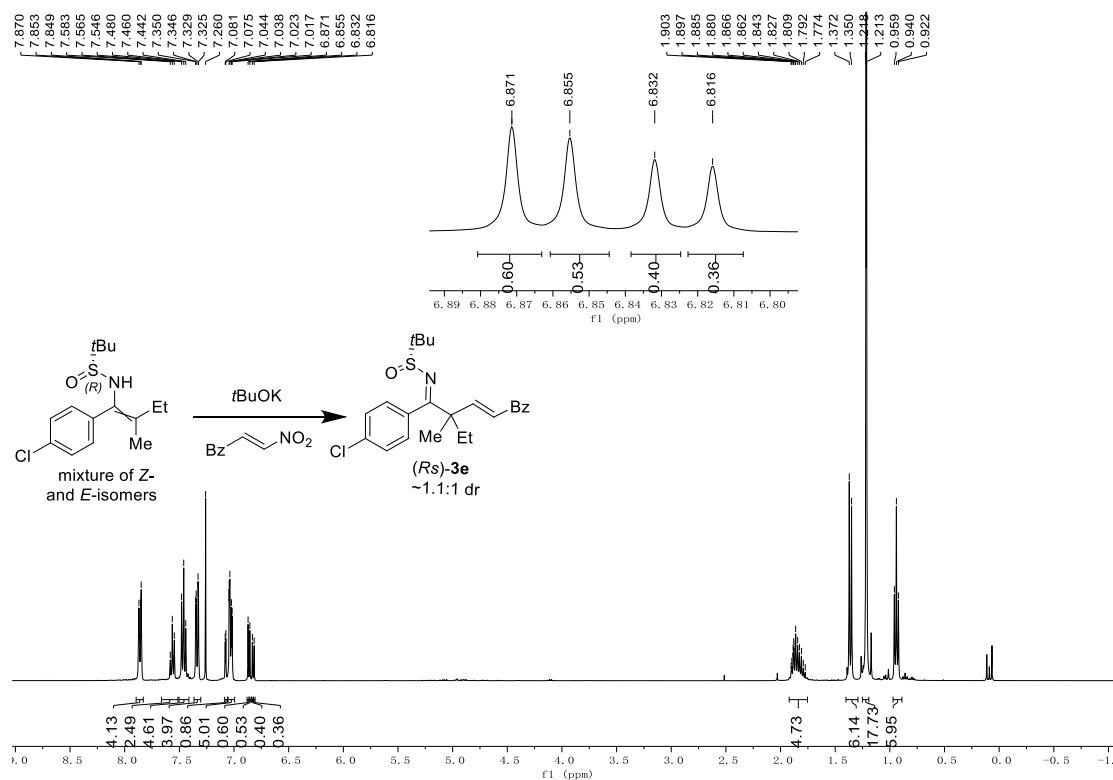

<sup>1</sup>H NMR spectrum (CDCl<sub>3</sub>, 400 MHz) of *(R<sub>s</sub>)-3e* with low diastereoselectivity (dr ~ 1:1) intentionally prepared using the corresponding enesulfonamide sample with low *Z/E* ratio

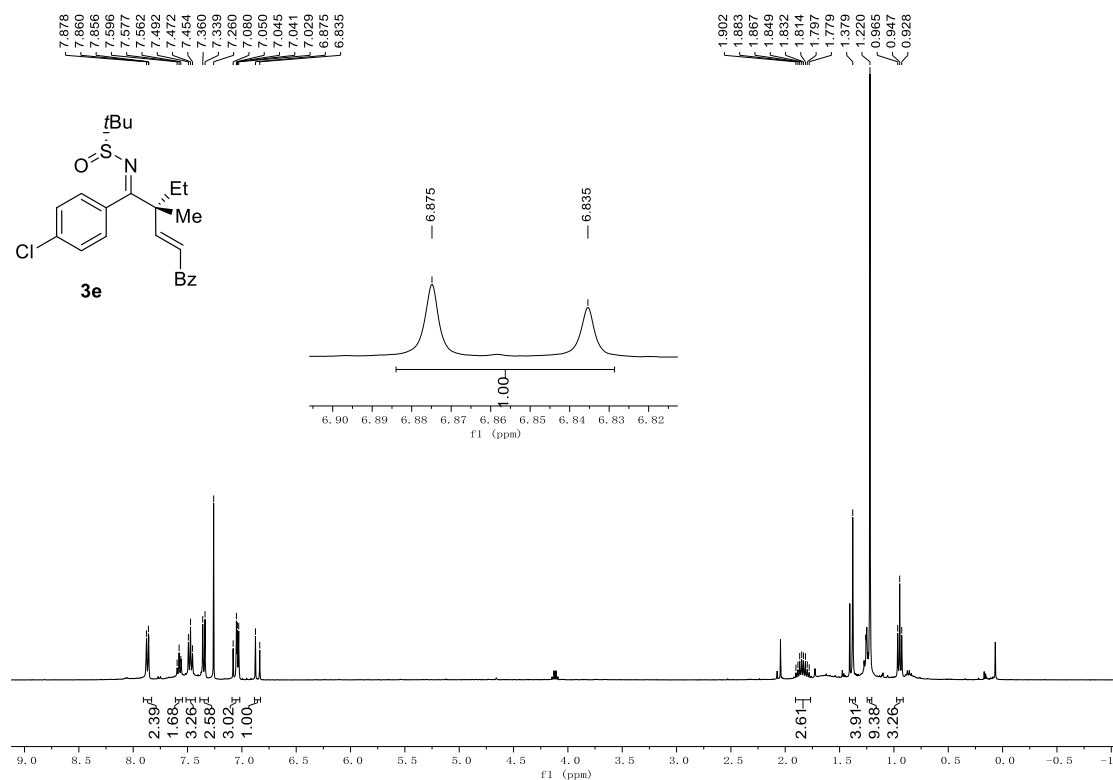

<sup>1</sup>H NMR spectrum (CDCl<sub>3</sub>, 400 MHz) of the crude reaction mixture of *(R<sub>s</sub>)-3e* (dr > 20:1) (No observable presence of the minor diastereomer)

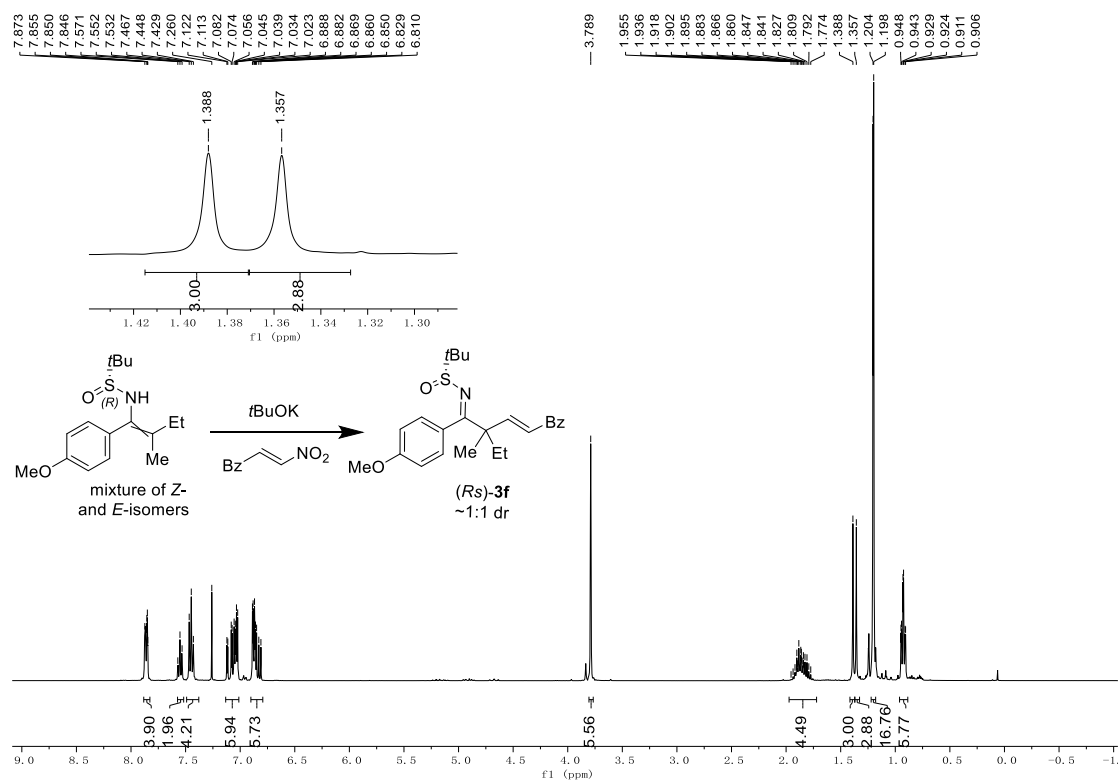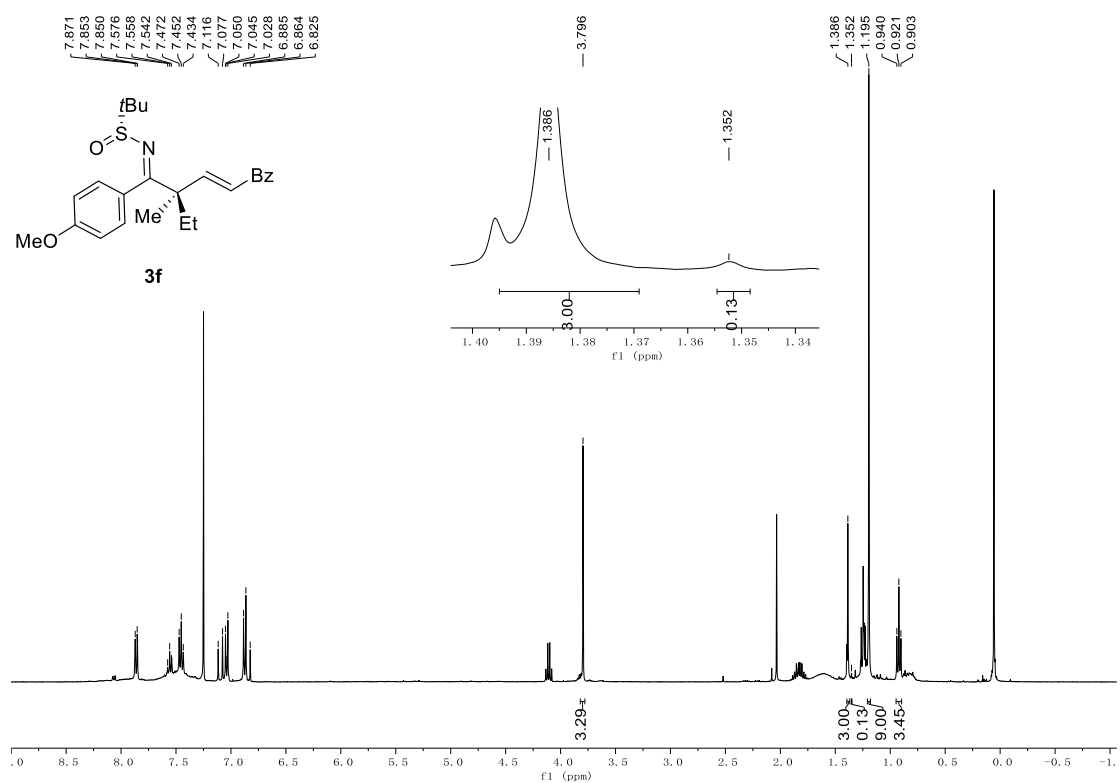

(*Rs*)-**3g**: HPLC conditions: Daicel Chiralcel AD-3 column, *n*-hexane/2-propanol = 97:03 (v/v), 1.0 mL/min, 254 nm, 40 °C.

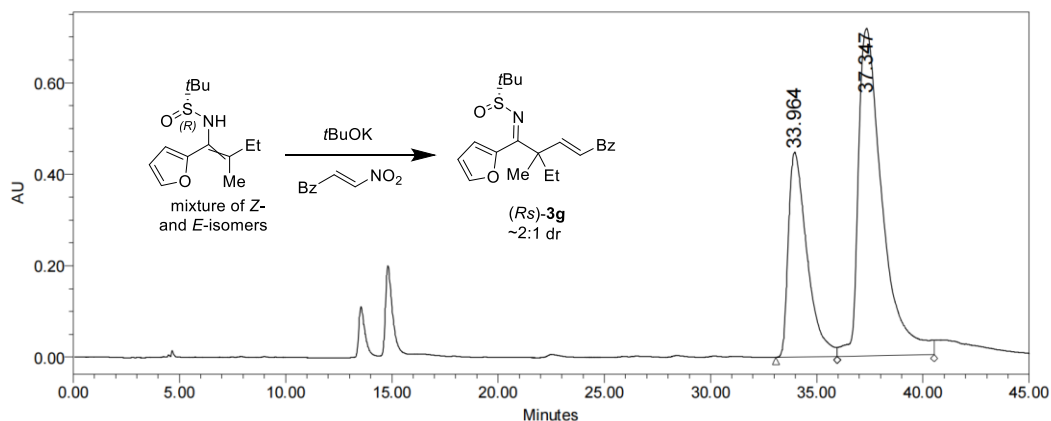

**Processed Channel Descr.: W2489 ChA 254nm**

|   | Processed Channel Descr. | RT     | Area     | % Area | Height |
|---|--------------------------|--------|----------|--------|--------|
| 1 | W2489 ChA 254nm          | 33.964 | 27404928 | 32.84  | 448143 |
| 2 | W2489 ChA 254nm          | 37.347 | 56043033 | 67.16  | 715746 |

HPLC chromatogram for dr determination of crude **3g**

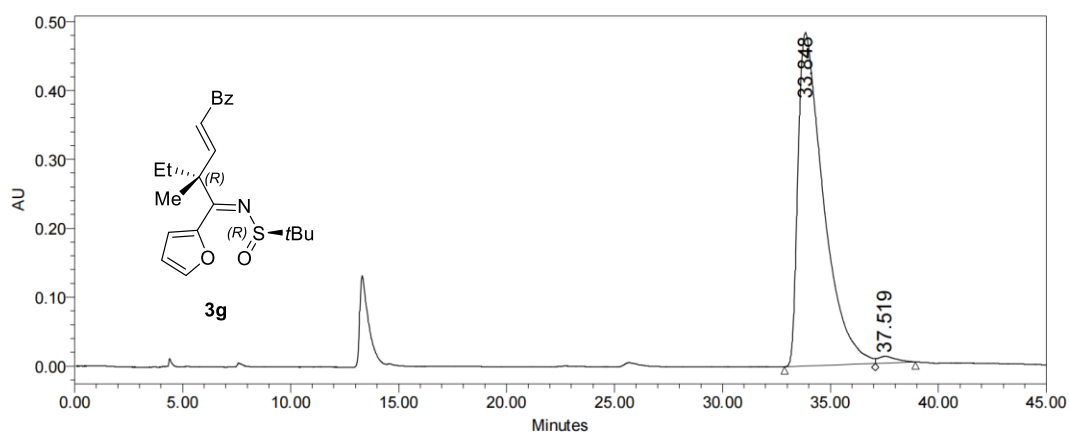

**Processed Channel Descr.: W2489 ChA 254nm**

|   | Processed Channel Descr. | RT     | Area     | % Area | Height |
|---|--------------------------|--------|----------|--------|--------|
| 1 | W2489 ChA 254nm          | 33.848 | 39705255 | 98.54  | 483948 |
| 2 | W2489 ChA 254nm          | 37.519 | 590316   | 1.46   | 9938   |

(*R*s)-**3h**: HPLC conditions: Daicel Chiralcel OD-3 column, *n*-hexane/2-propanol = 97:03 (v/v), 1.0 mL/min, 254 nm, 40 °C.

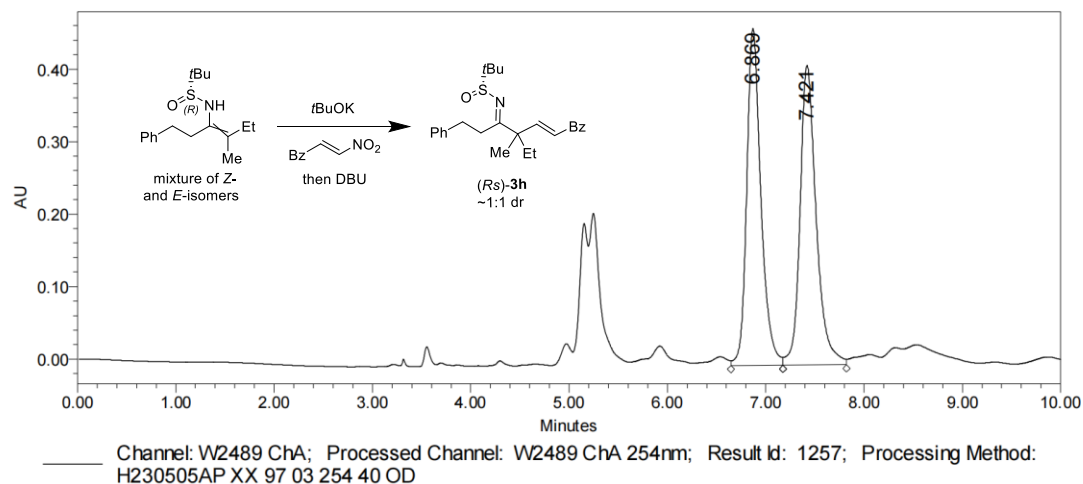

**Processed Channel Descr.: W2489 ChA 254nm**

|   | Processed Channel Descr. | RT    | Area    | % Area | Height |
|---|--------------------------|-------|---------|--------|--------|
| 1 | W2489 ChA 254nm          | 6.869 | 4665458 | 49.58  | 464550 |
| 2 | W2489 ChA 254nm          | 7.421 | 4744107 | 50.42  | 413481 |

HPLC chromatogram for dr determination of crude **3h**

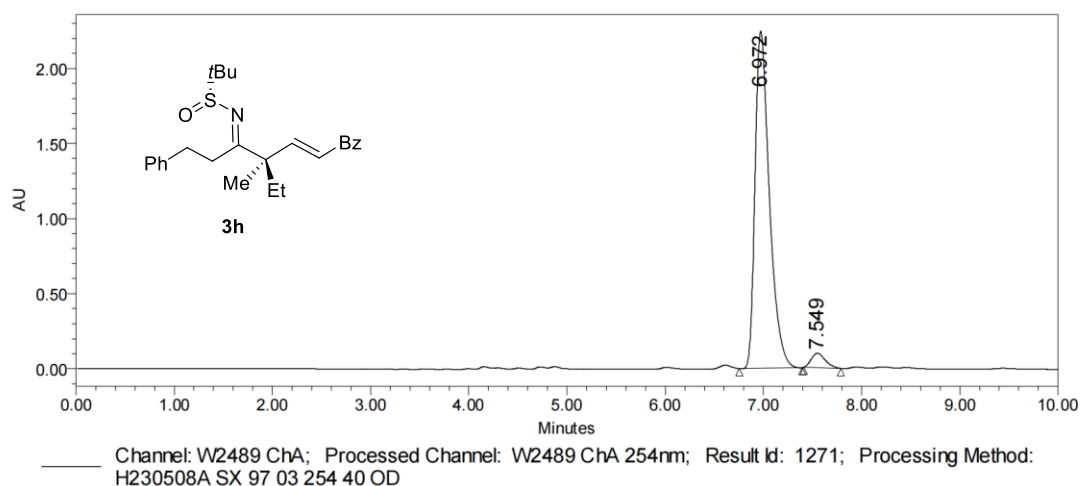

**Processed Channel Descr.: W2489 ChA 254nm**

|   | Processed Channel Descr. | RT    | Area     | % Area | Height  |
|---|--------------------------|-------|----------|--------|---------|
| 1 | W2489 ChA 254nm          | 6.972 | 22781264 | 95.99  | 2243967 |
| 2 | W2489 ChA 254nm          | 7.549 | 951011   | 4.01   | 95930   |

(*R*<sub>s</sub>)-**3i**: HPLC conditions: Daicel Chiralcel ID-3 column, *n*-hexane/2-propanol = 90:10 (v/v), 1.0 mL/min, 254 nm, 40 °C.

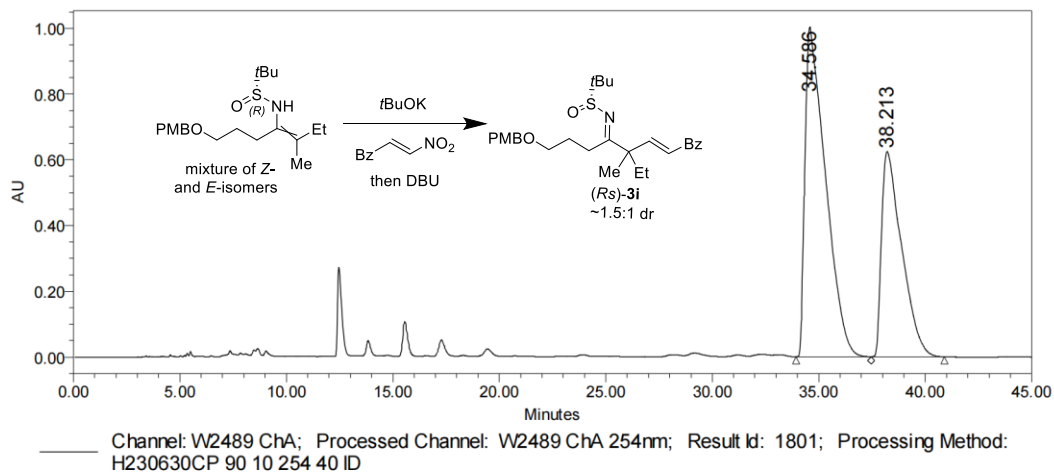

**Processed Channel Descr.: W2489 ChA 254nm**

|   | Processed Channel Descr. | RT     | Area     | % Area | Height  |
|---|--------------------------|--------|----------|--------|---------|
| 1 | W2489 ChA 254nm          | 34.586 | 67372425 | 62.13  | 1002943 |
| 2 | W2489 ChA 254nm          | 38.213 | 41072719 | 37.87  | 624617  |

HPLC chromatogram for dr determination of crude **3i**

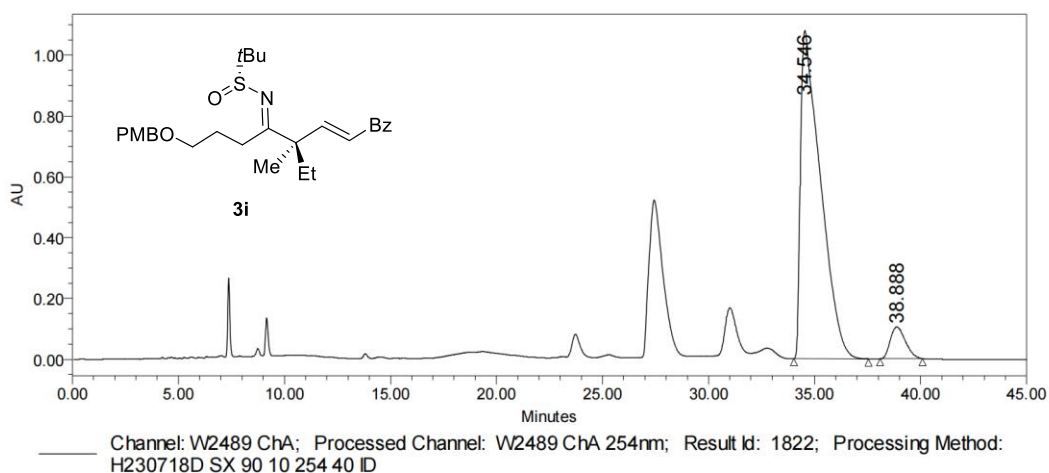

**Processed Channel Descr.: W2489 ChA 254nm**

|   | Processed Channel Descr. | RT     | Area     | % Area | Height  |
|---|--------------------------|--------|----------|--------|---------|
| 1 | W2489 ChA 254nm          | 34.546 | 70732758 | 93.17  | 1078581 |
| 2 | W2489 ChA 254nm          | 38.888 | 5185740  | 6.83   | 104414  |

(*R*<sub>s</sub>)-**3j**: HPLC conditions: Daicel Chiralcel ID-3 column, *n*-hexane/2-propanol = 95:05 (v/v), 1.0 mL/min, 254 nm, 40 °C.

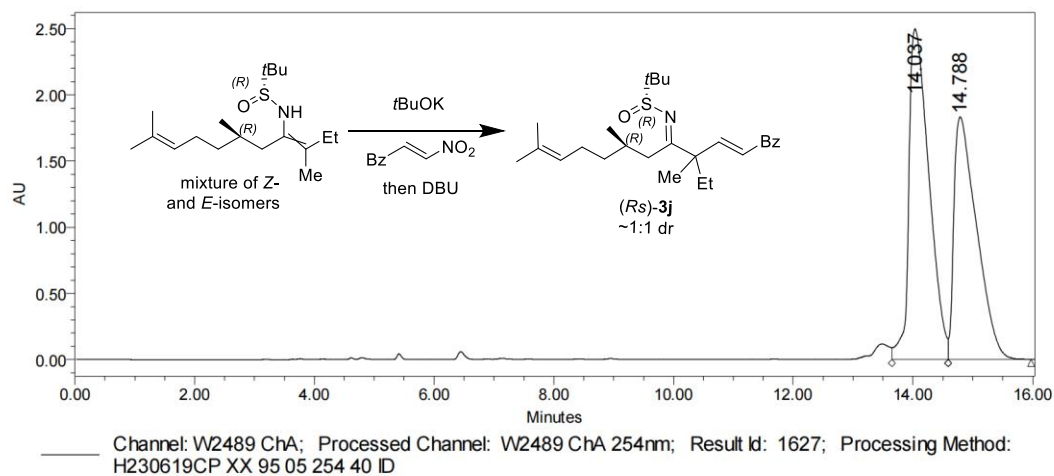

**Processed Channel Descr.: W2489 ChA 254nm**

|   | Processed Channel Descr. | RT     | Area     | % Area | Height  |
|---|--------------------------|--------|----------|--------|---------|
| 1 | W2489 ChA 254nm          | 14.037 | 58265034 | 54.70  | 2497014 |
| 2 | W2489 ChA 254nm          | 14.788 | 48261397 | 45.30  | 1831398 |

HPLC chromatogram for dr determination of crude **3j**

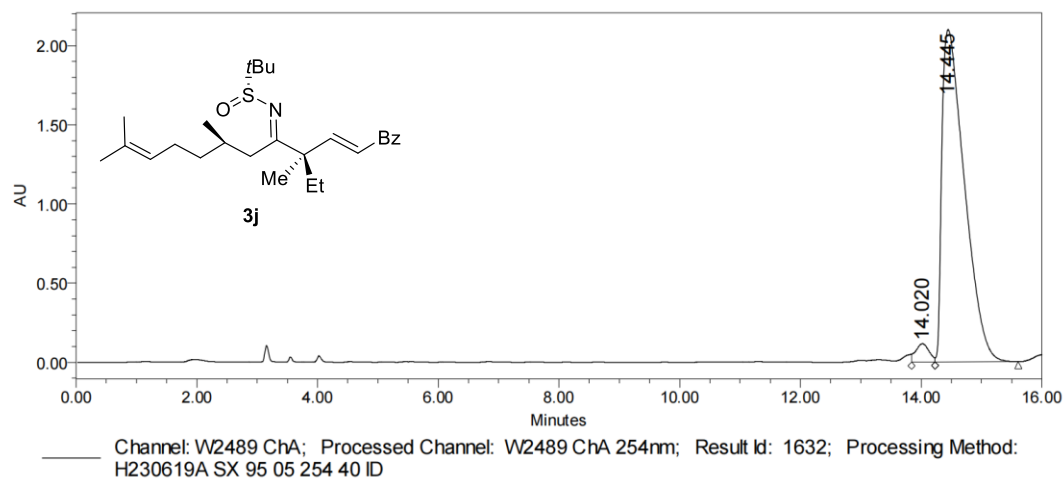

**Processed Channel Descr.: W2489 ChA 254nm**

|   | Processed Channel Descr. | RT     | Area     | % Area | Height  |
|---|--------------------------|--------|----------|--------|---------|
| 1 | W2489 ChA 254nm          | 14.020 | 1776660  | 3.17   | 115850  |
| 2 | W2489 ChA 254nm          | 14.445 | 54300303 | 96.83  | 2099257 |



(*R*<sub>s</sub>)-**3k**: HPLC conditions: Daicel Chiralcel ID-3 column, *n*-hexane/2-propanol = 90:10 (v/v), 1.0 mL/min, 254 nm, 40 °C.

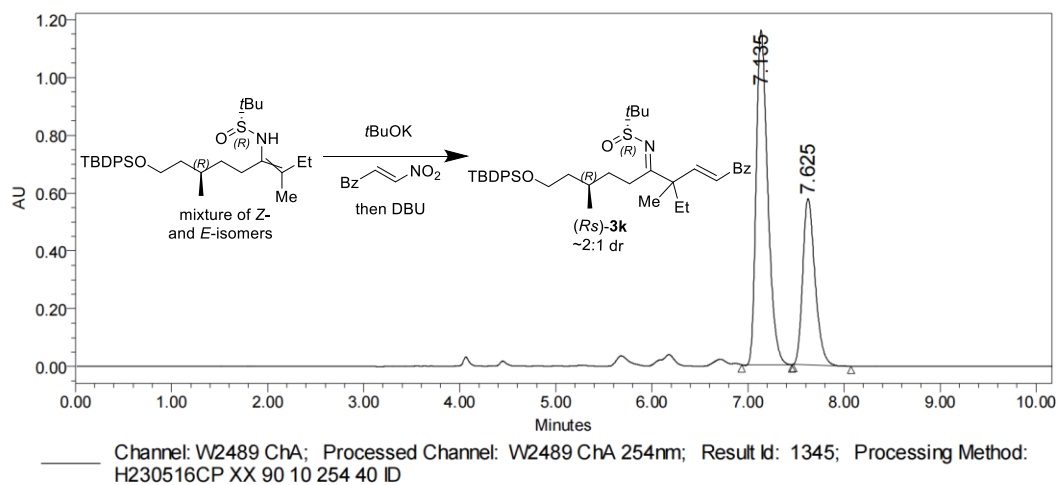

**Processed Channel Descr.: W2489 ChA 254nm**

|   | Processed Channel Descr. | RT    | Area    | % Area | Height  |
|---|--------------------------|-------|---------|--------|---------|
| 1 | W2489 ChA 254nm          | 7.135 | 9717386 | 65.57  | 1157529 |
| 2 | W2489 ChA 254nm          | 7.625 | 5102397 | 34.43  | 575379  |

HPLC chromatogram for dr determination of crude **3k**

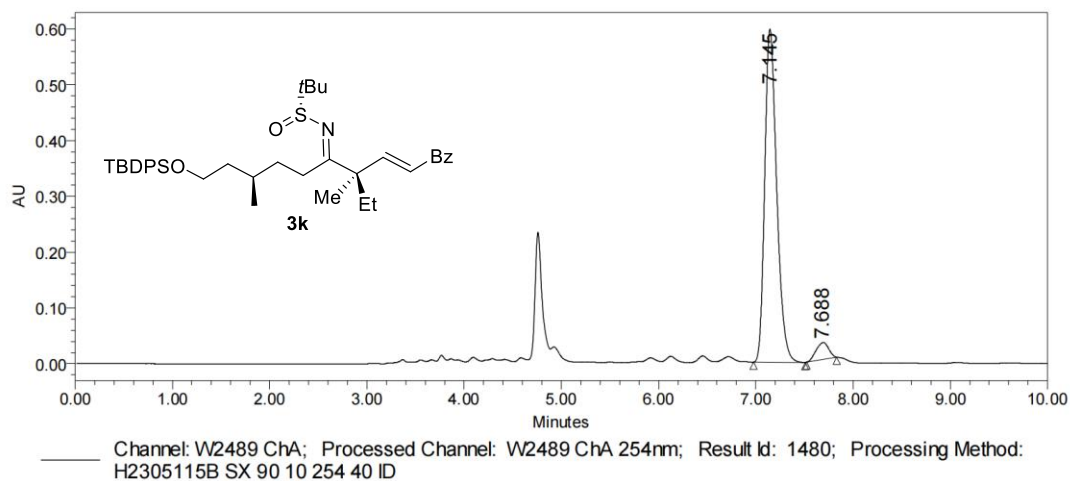

**Processed Channel Descr.: W2489 ChA 254nm**

|   | Processed Channel Descr. | RT    | Area    | % Area | Height |
|---|--------------------------|-------|---------|--------|--------|
| 1 | W2489 ChA 254nm          | 7.145 | 5092515 | 94.94  | 596983 |
| 2 | W2489 ChA 254nm          | 7.688 | 271569  | 5.06   | 30151  |

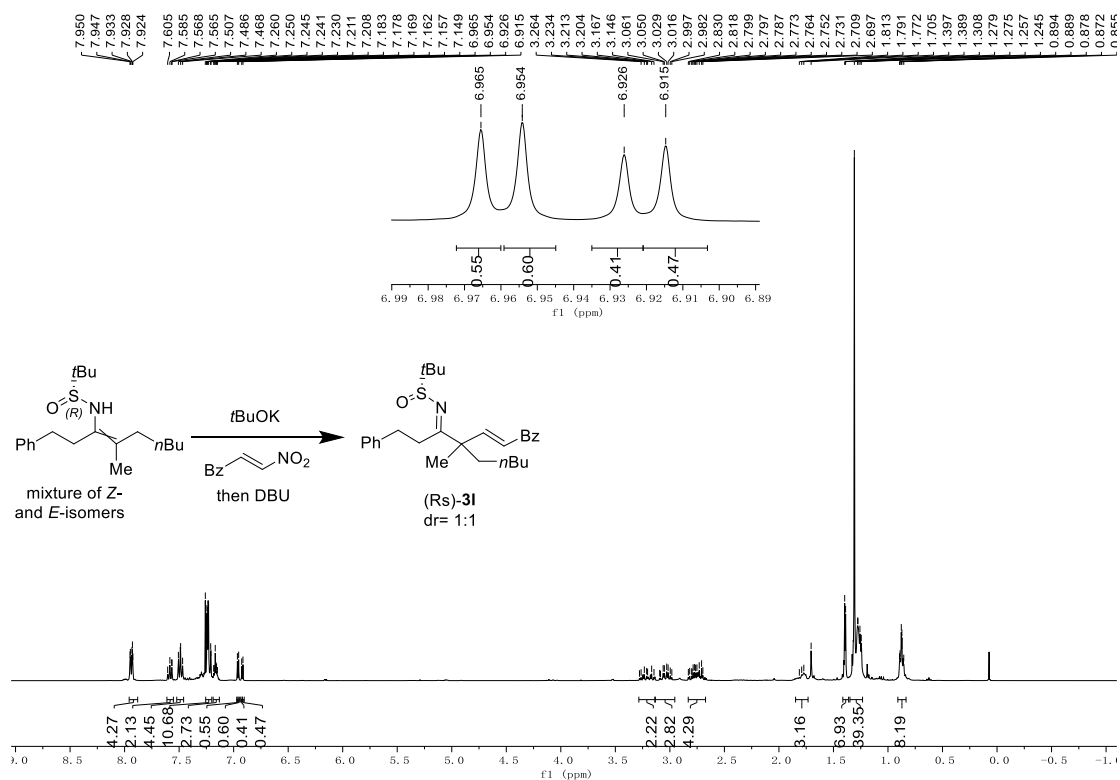

<sup>1</sup>H NMR spectrum (CDCl<sub>3</sub>, 400 MHz) of **(*R*)-3I** with low diastereoselectivity (dr ~ 1:1) intentionally prepared using the corresponding enesulfonamide sample with low *Z/E* ratio

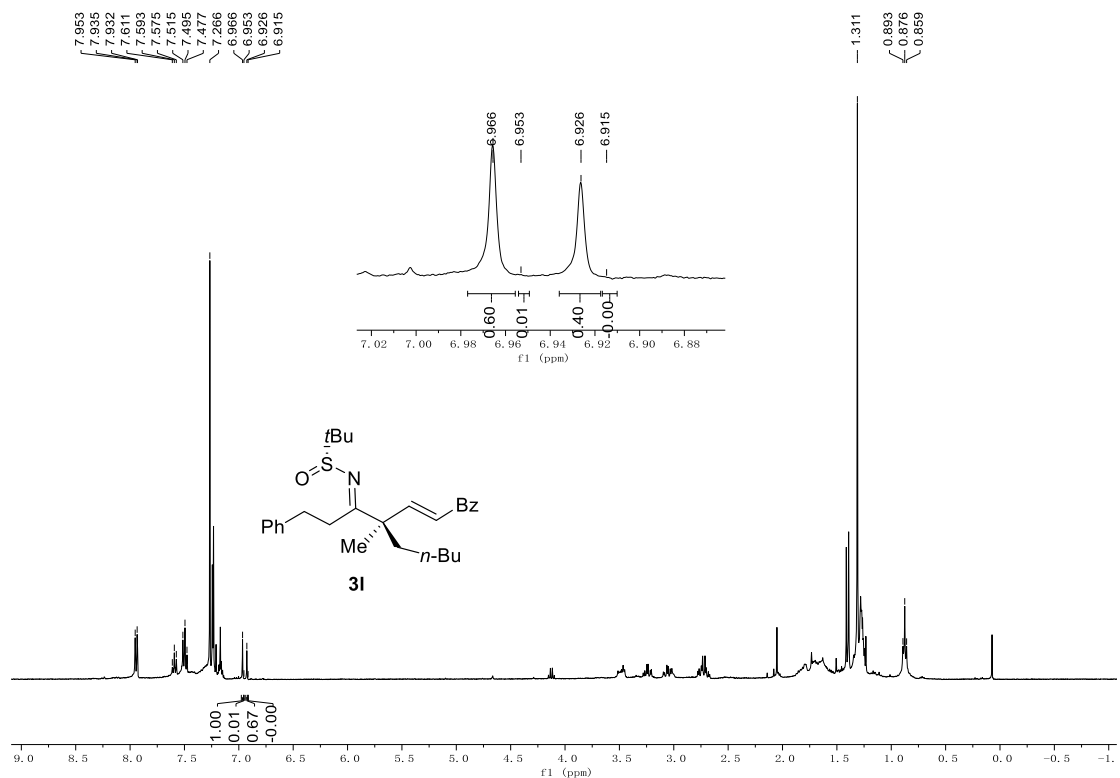

<sup>1</sup>H NMR spectrum (CDCl<sub>3</sub>, 400 MHz) of the crude reaction mixture of **3I** (dr > 20:1)

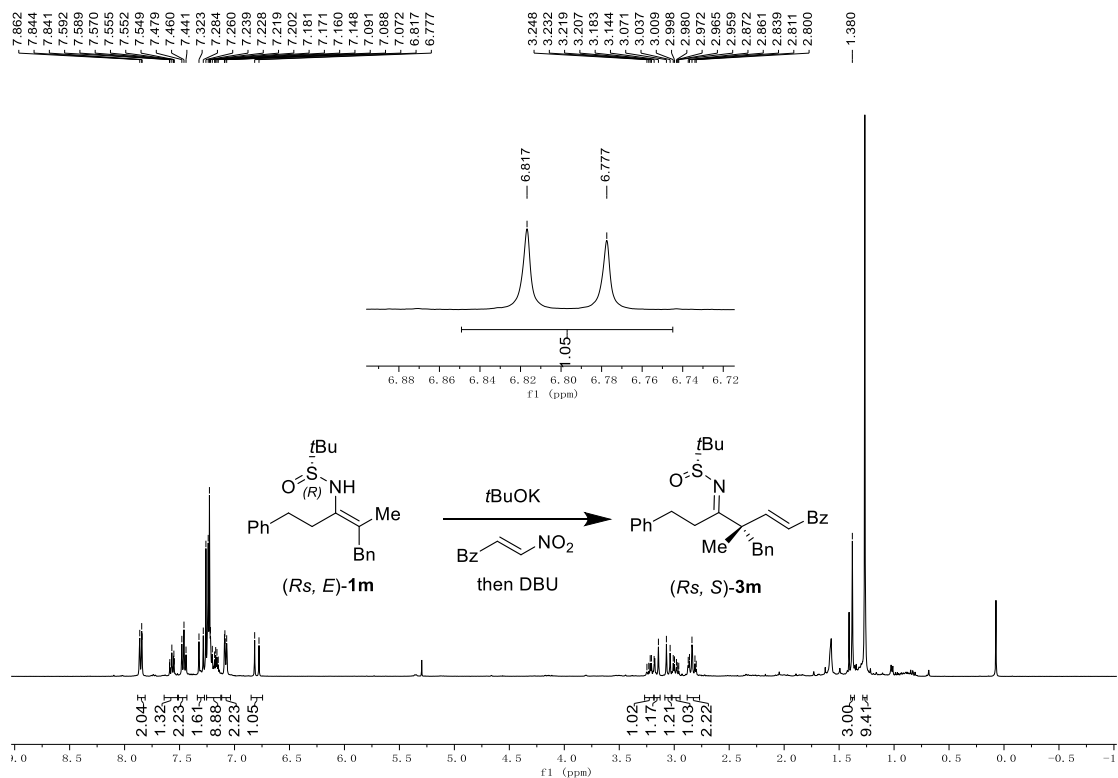

<sup>1</sup>H NMR spectrum (CDCl<sub>3</sub>, 400 MHz) of the diastereomer (*R<sub>s</sub>, S*)-**3m** that was intentionally prepared by using geometric isomer (*R<sub>s</sub>, E*)-**1m** and was used to identify the diagnostic peak(s) of the minor diastereomer

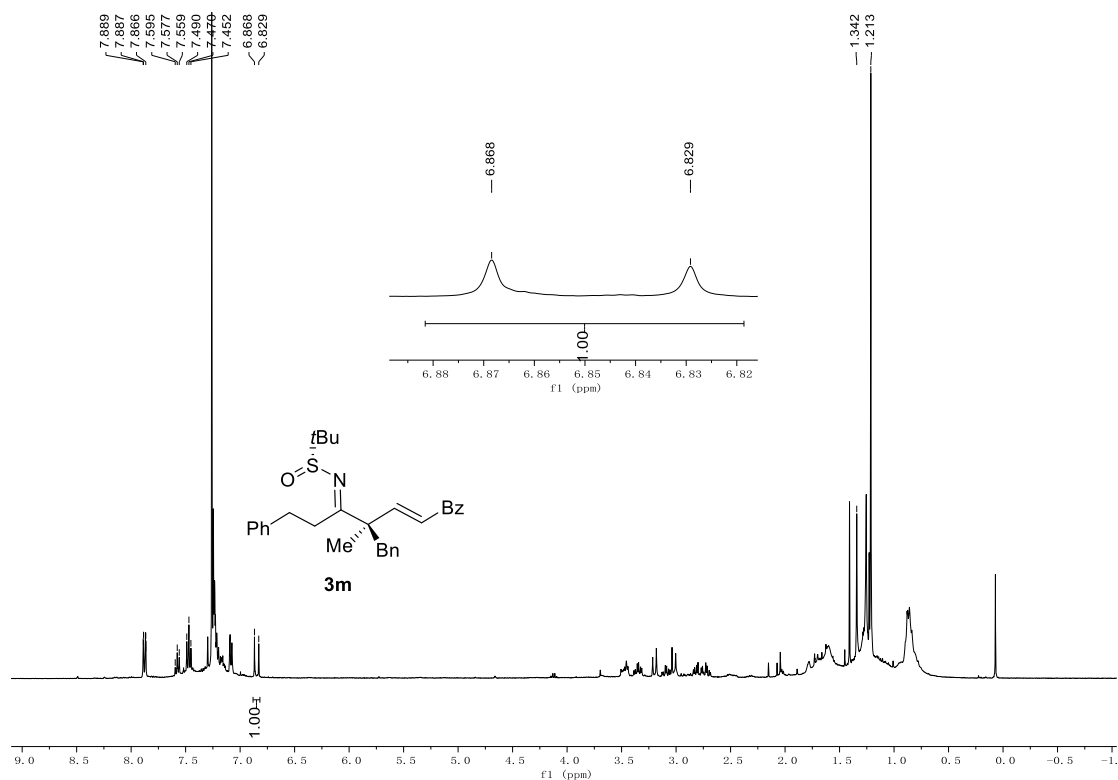

<sup>1</sup>H NMR spectrum (CDCl<sub>3</sub>, 400 MHz) of the crude reaction mixture of **3m** (dr > 20:1)  
(No observable presence of the minor diastereomer)

(*R*s)-**3n**: HPLC conditions: Daicel Chiralcel OD-3 column, *n*-hexane/2-propanol = 97:03 (v/v), 1.0 mL/min, 254 nm, 40 °C.

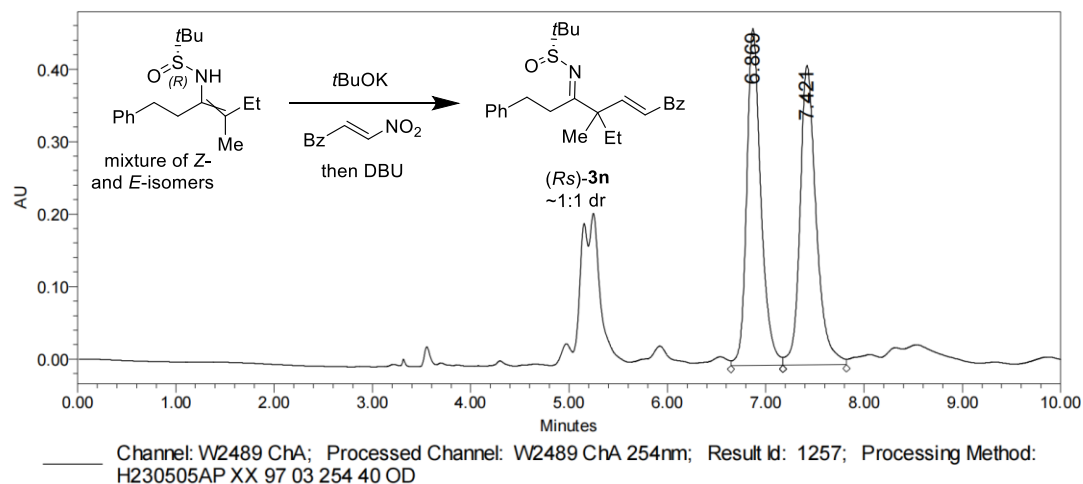

**Processed Channel Descr.: W2489 ChA 254nm**

|   | Processed Channel Descr. | RT    | Area    | % Area | Height |
|---|--------------------------|-------|---------|--------|--------|
| 1 | W2489 ChA 254nm          | 6.869 | 4665458 | 49.58  | 464550 |
| 2 | W2489 ChA 254nm          | 7.421 | 4744107 | 50.42  | 413481 |

HPLC chromatogram for dr determination of crude **3n**

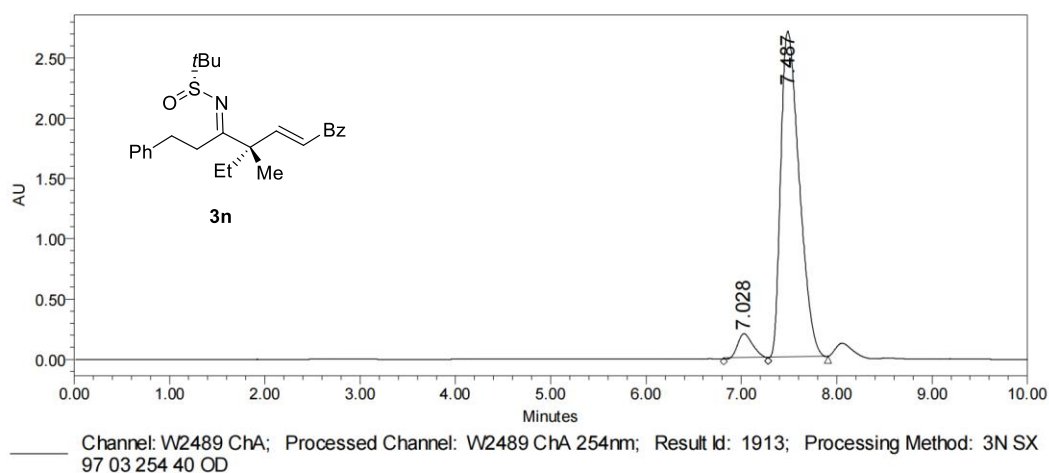

**Processed Channel Descr.: W2489 ChA 254nm**

|   | Processed Channel Descr. | RT    | Area     | % Area | Height  |
|---|--------------------------|-------|----------|--------|---------|
| 1 | W2489 ChA 254nm          | 7.028 | 2120601  | 5.50   | 197684  |
| 2 | W2489 ChA 254nm          | 7.487 | 36444628 | 94.50  | 2701408 |

(*R*s)-**3o**: HPLC conditions: Daicel Chiralcel AD-3 column, *n*-hexane/2-propanol = 90:10 (v/v), 1.0 mL/min, 254 nm, 40 °C.

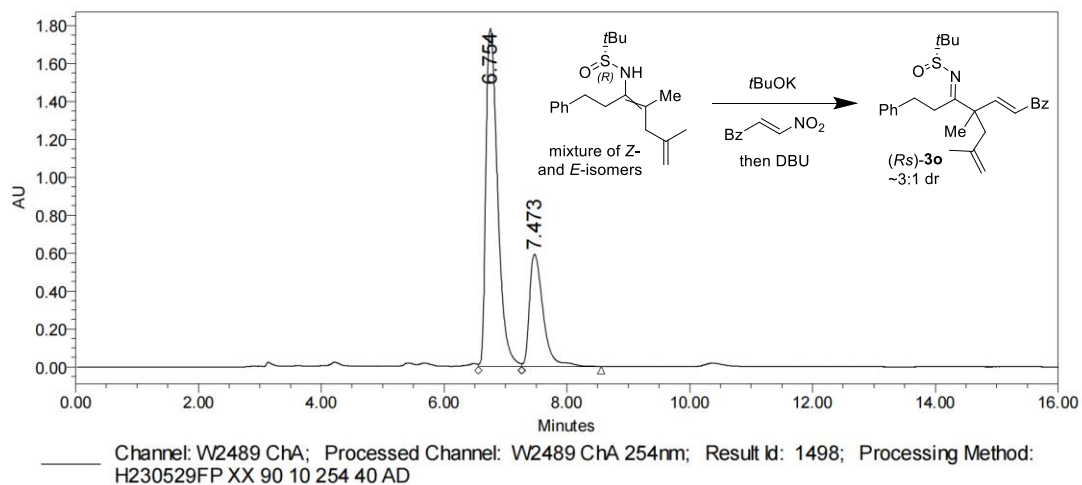

**Processed Channel Descr.: W2489 ChA 254nm**

|   | Processed Channel Descr. | RT    | Area     | % Area | Height  |
|---|--------------------------|-------|----------|--------|---------|
| 1 | W2489 ChA 254nm          | 6.754 | 23634556 | 72.01  | 1781222 |
| 2 | W2489 ChA 254nm          | 7.473 | 9184699  | 27.99  | 592447  |

HPLC chromatogram for dr determination of crude **3o**

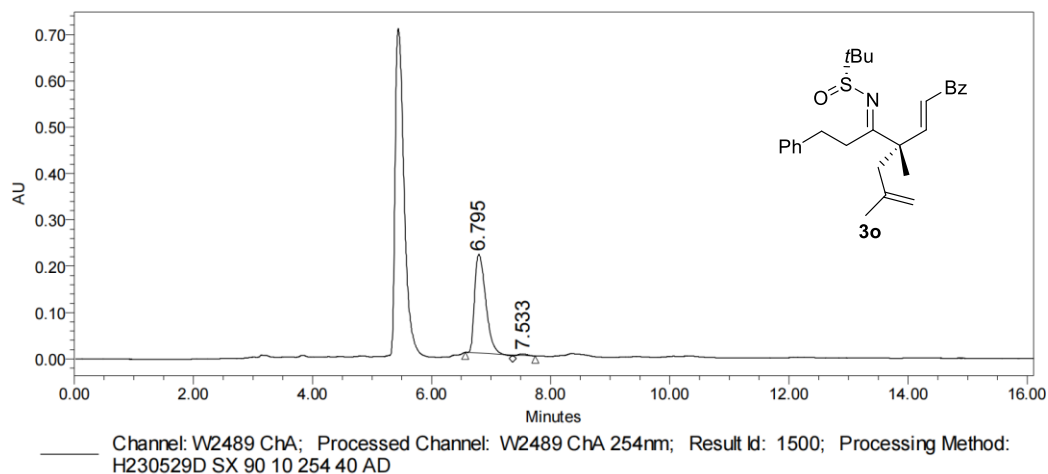

**Processed Channel Descr.: W2489 ChA 254nm**

|   | Processed Channel Descr. | RT    | Area    | % Area | Height |
|---|--------------------------|-------|---------|--------|--------|
| 1 | W2489 ChA 254nm          | 6.795 | 2764927 | 98.74  | 212762 |
| 2 | W2489 ChA 254nm          | 7.533 | 35204   | 1.26   | 3009   |

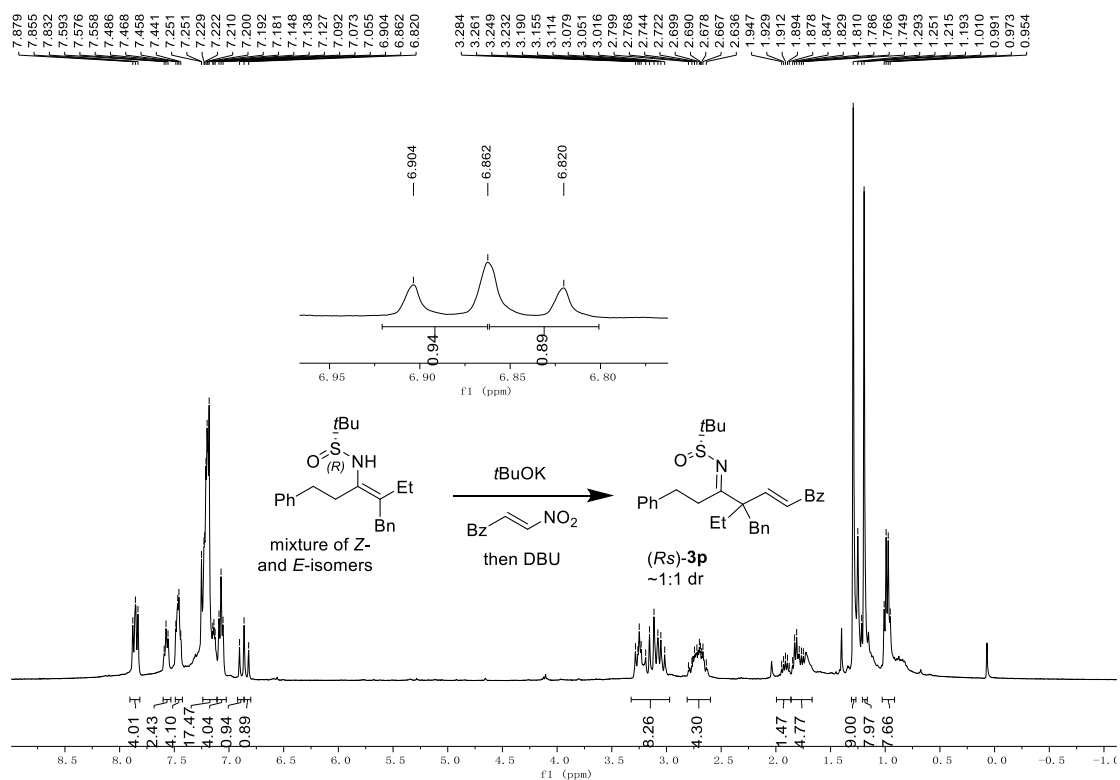

<sup>1</sup>H NMR spectrum (CDCl<sub>3</sub>, 400 MHz) of **(*R*)-3p** with low diastereoselectivity (dr ~ 1:1) intentionally prepared using the corresponding enesulfonamide sample with low *Z/E* ratio

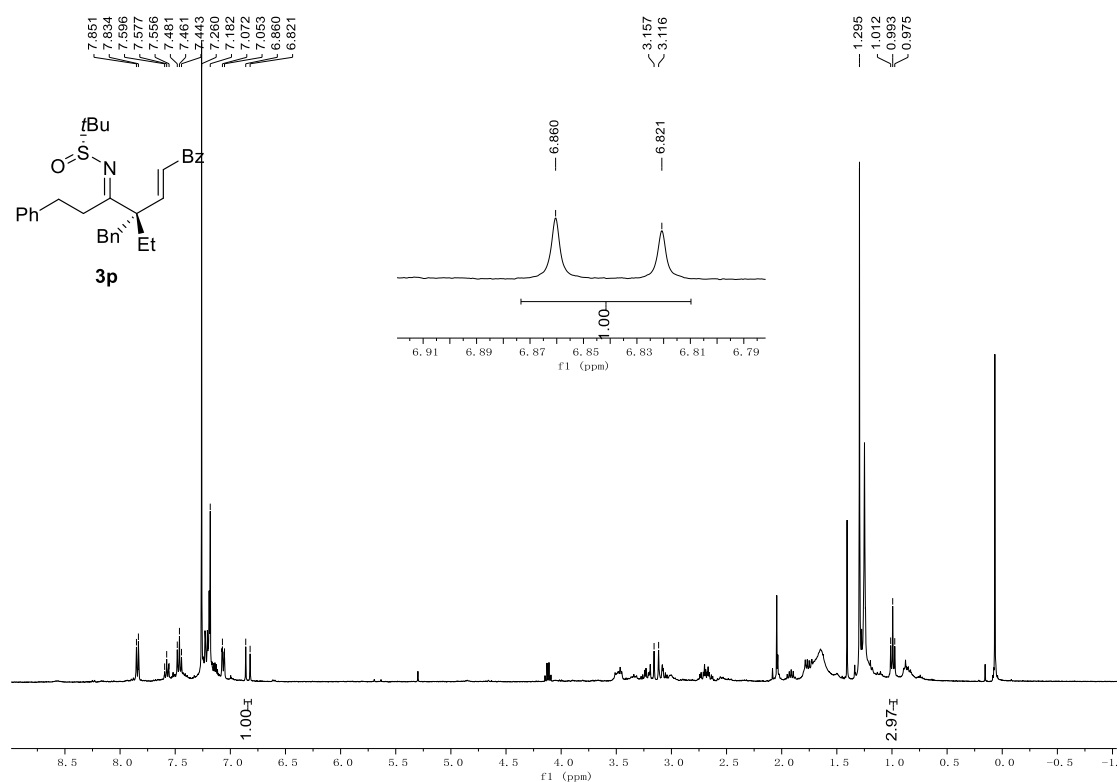

<sup>1</sup>H NMR spectrum (CDCl<sub>3</sub>, 400 MHz) of the crude reaction mixture of **3p** (dr > 20:1) (No observable presence of the minor diastereomer)

(*R*s)-**3q**: HPLC conditions: Daicel Chiralcel ID-3 column, *n*-hexane/2-propanol = 90:10 (v/v), 1.0 mL/min, 254 nm, 40 °C.

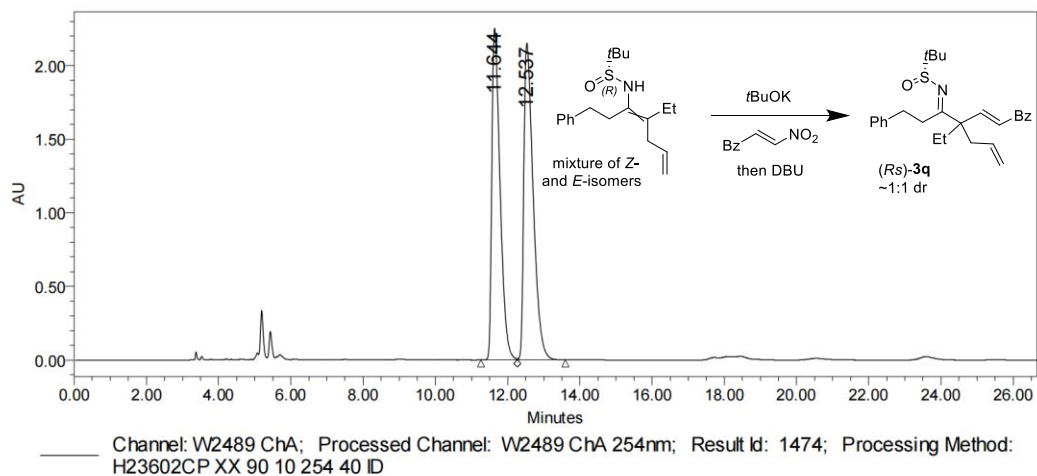

**Processed Channel Descr.: W2489 ChA 254nm**

|   | Processed Channel Descr. | RT     | Area     | % Area | Height  |
|---|--------------------------|--------|----------|--------|---------|
| 1 | W2489 ChA 254nm          | 11.644 | 35558727 | 47.88  | 2251228 |
| 2 | W2489 ChA 254nm          | 12.537 | 38711202 | 52.12  | 2149453 |

HPLC chromatogram for dr determination of crude **3q**

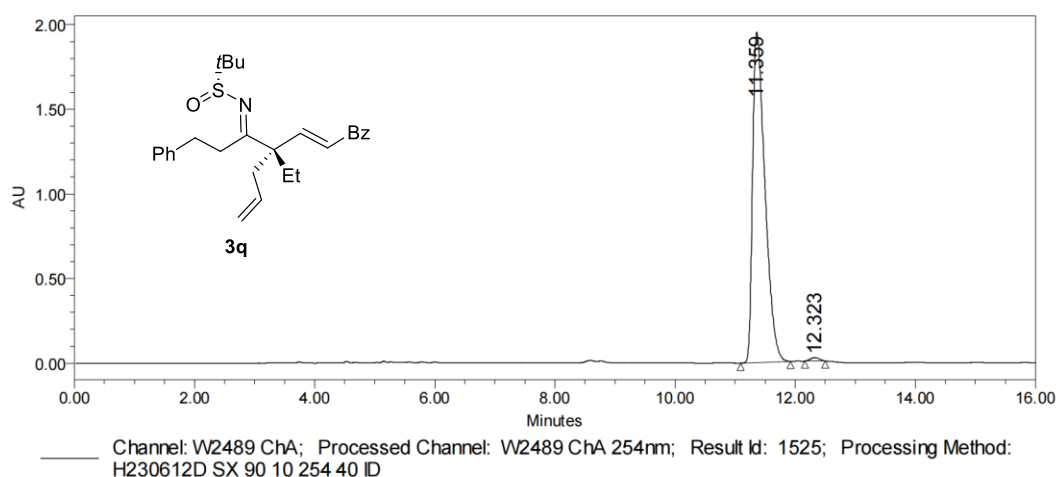

**Processed Channel Descr.: W2489 ChA 254nm**

|   | Processed Channel Descr. | RT     | Area     | % Area | Height  |
|---|--------------------------|--------|----------|--------|---------|
| 1 | W2489 ChA 254nm          | 11.359 | 27865196 | 99.25  | 1951325 |
| 2 | W2489 ChA 254nm          | 12.323 | 209629   | 0.75   | 19716   |

(*R*<sub>s</sub>)-**3r**: HPLC conditions: Daicel Chiralcel IC-3 column, *n*-hexane/2-propanol = 90:10 (v/v), 1.0 mL/min, 254 nm, 40 °C.

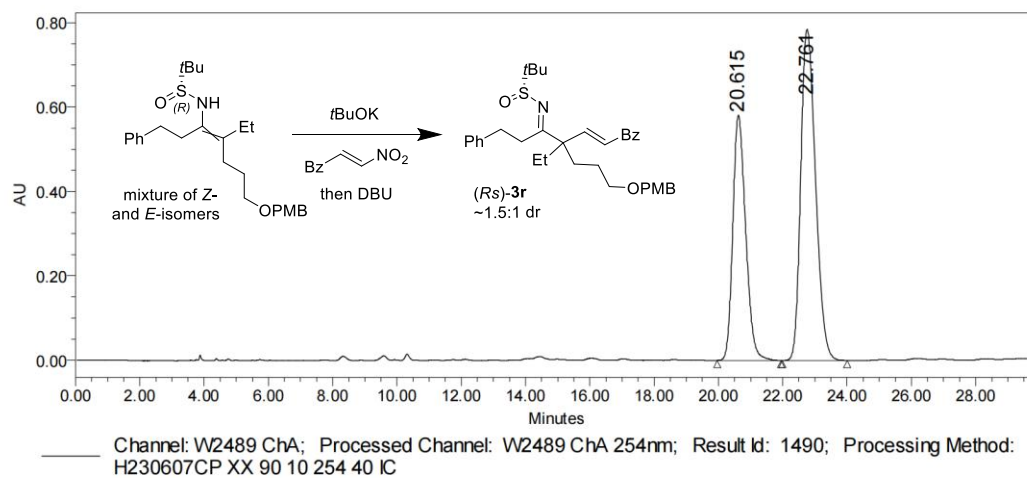

**Processed Channel Descr.: W2489 ChA 254nm**

|   | Processed Channel Descr. | RT     | Area     | % Area | Height |
|---|--------------------------|--------|----------|--------|--------|
| 1 | W2489 ChA 254nm          | 20.615 | 16122603 | 39.12  | 581275 |
| 2 | W2489 ChA 254nm          | 22.761 | 25091919 | 60.88  | 784680 |

HPLC chromatogram for dr determination of crude **3r**

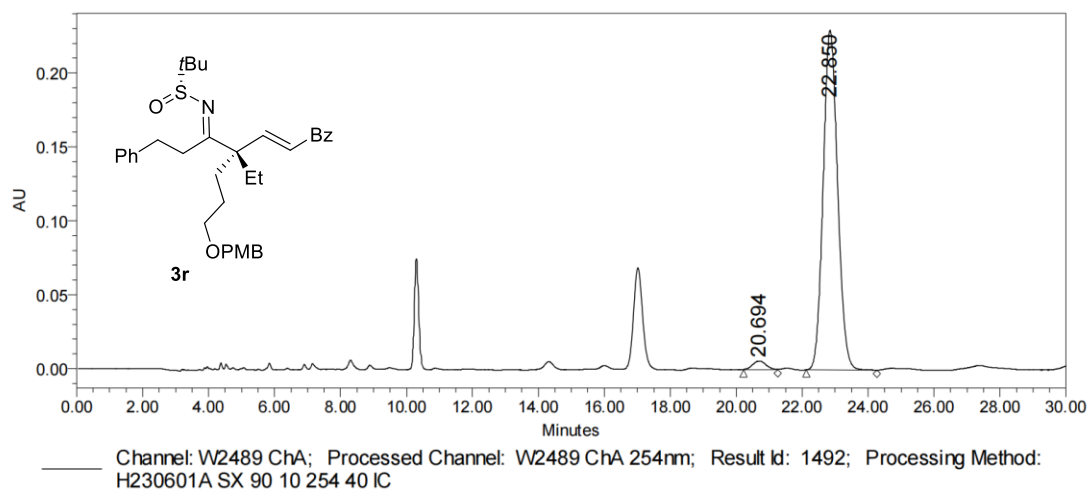

**Processed Channel Descr.: W2489 ChA 254nm**

|   | Processed Channel Descr. | RT     | Area    | % Area | Height |
|---|--------------------------|--------|---------|--------|--------|
| 1 | W2489 ChA 254nm          | 20.694 | 162096  | 2.27   | 5814   |
| 2 | W2489 ChA 254nm          | 22.850 | 6990685 | 97.73  | 229591 |



(*R*<sub>s</sub>)-**3s**: HPLC conditions: Daicel Chiralcel ID-3 column, *n*-hexane/2-propanol = 95:05 (v/v), 1.0 mL/min, 254 nm, 40 °C.

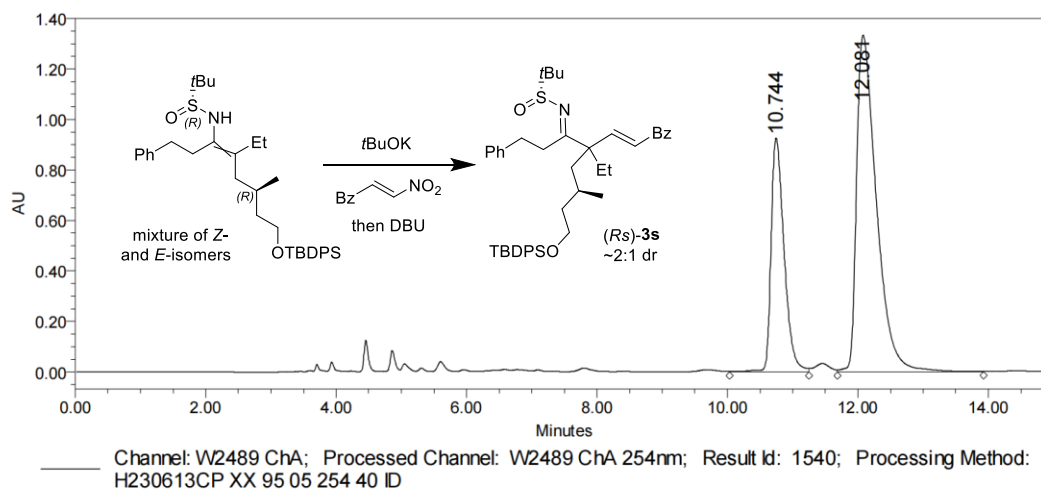

**Processed Channel Descr.: W2489 ChA 254nm**

|   | Processed Channel Descr. | RT     | Area     | % Area | Height  |
|---|--------------------------|--------|----------|--------|---------|
| 1 | W2489 ChA 254nm          | 10.744 | 12816803 | 31.28  | 926091  |
| 2 | W2489 ChA 254nm          | 12.081 | 28156608 | 68.72  | 1332575 |

HPLC chromatogram for dr determination of crude **3s**

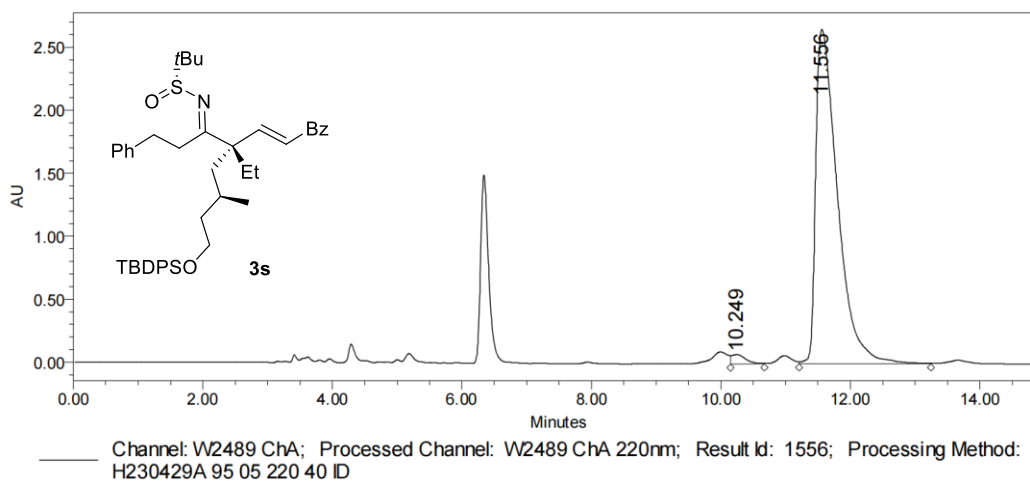

**Processed Channel Descr.: W2489 ChA 220nm**

|   | Processed Channel Descr. | RT     | Area     | % Area | Height  |
|---|--------------------------|--------|----------|--------|---------|
| 1 | W2489 ChA 220nm          | 10.249 | 1133145  | 1.79   | 74088   |
| 2 | W2489 ChA 220nm          | 11.556 | 62236139 | 98.21  | 2654860 |



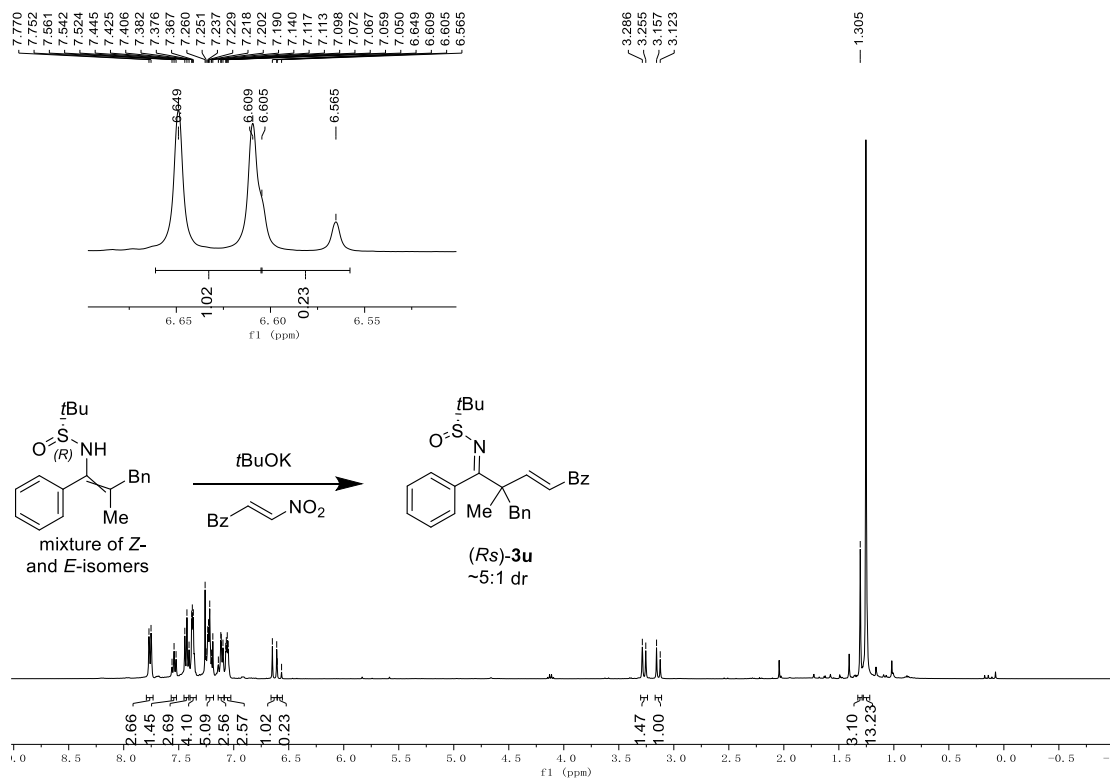

<sup>1</sup>H NMR spectrum (CDCl<sub>3</sub>, 400 MHz) of **(*R*<sub>s</sub>)-3u** with low diastereoselectivity (dr ~ 5:1) intentionally prepared using the corresponding enesulfonamide sample with low *Z/E* ratio

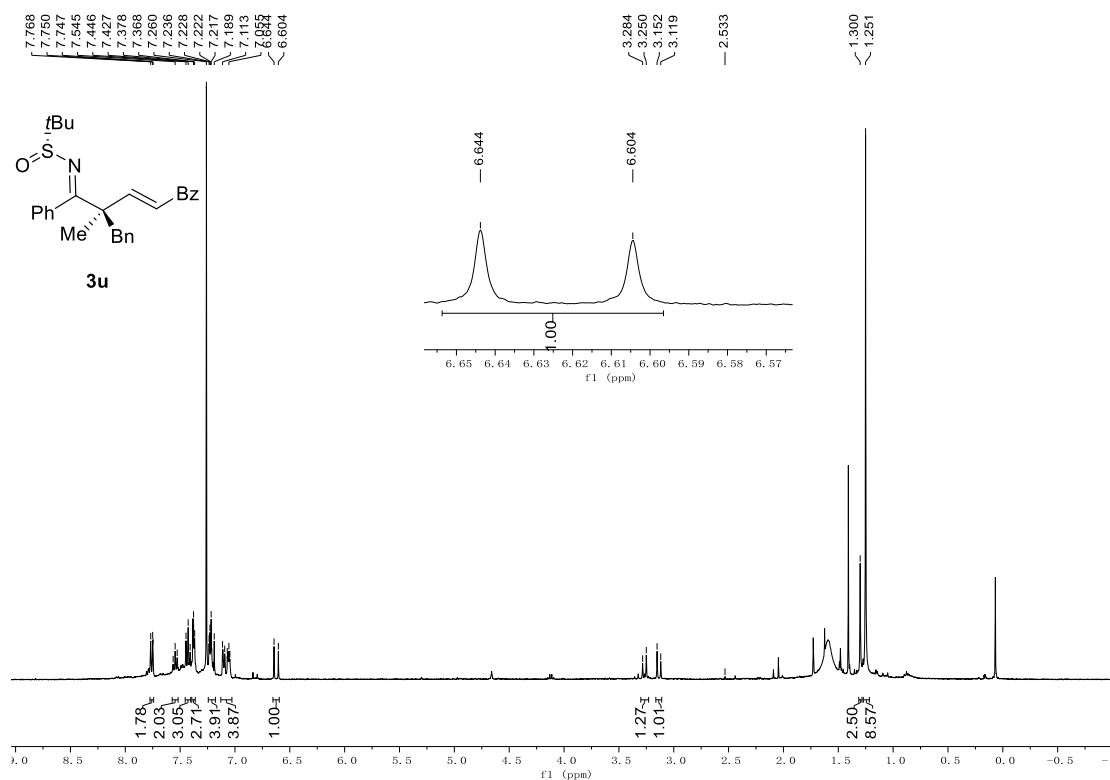

<sup>1</sup>H NMR spectrum (CDCl<sub>3</sub>, 400 MHz) of the crude reaction mixture of **3u** (dr > 20:1) (No observable presence of the minor diastereomer)

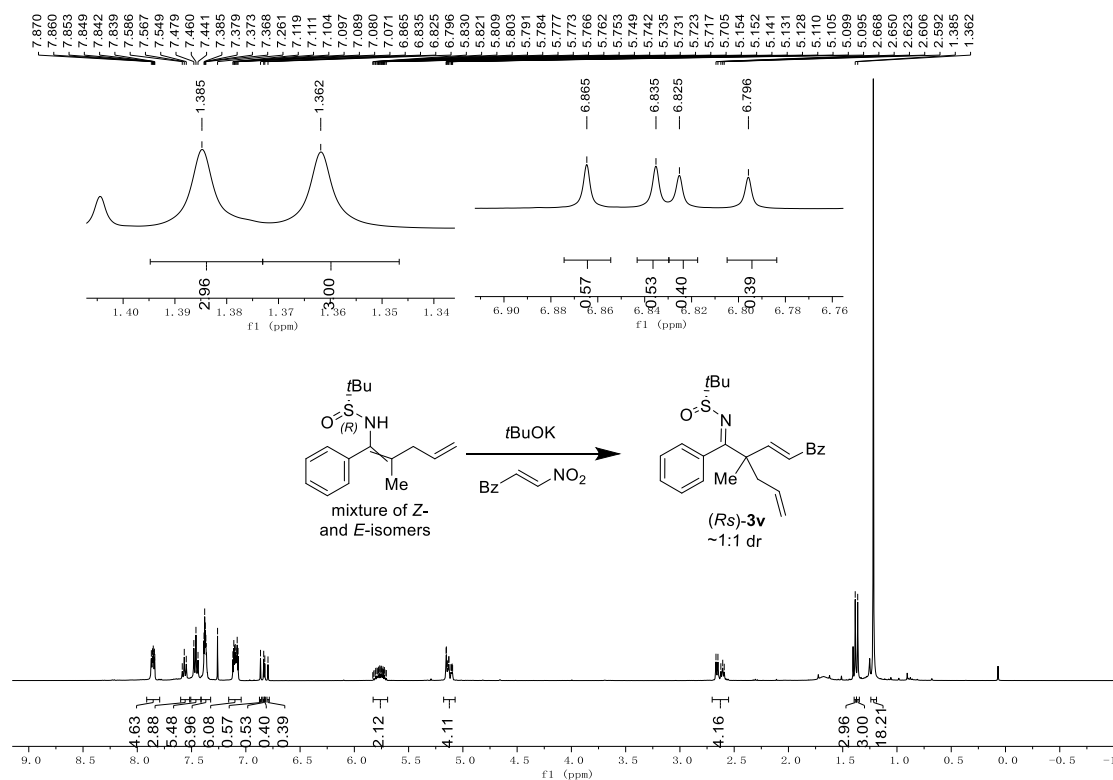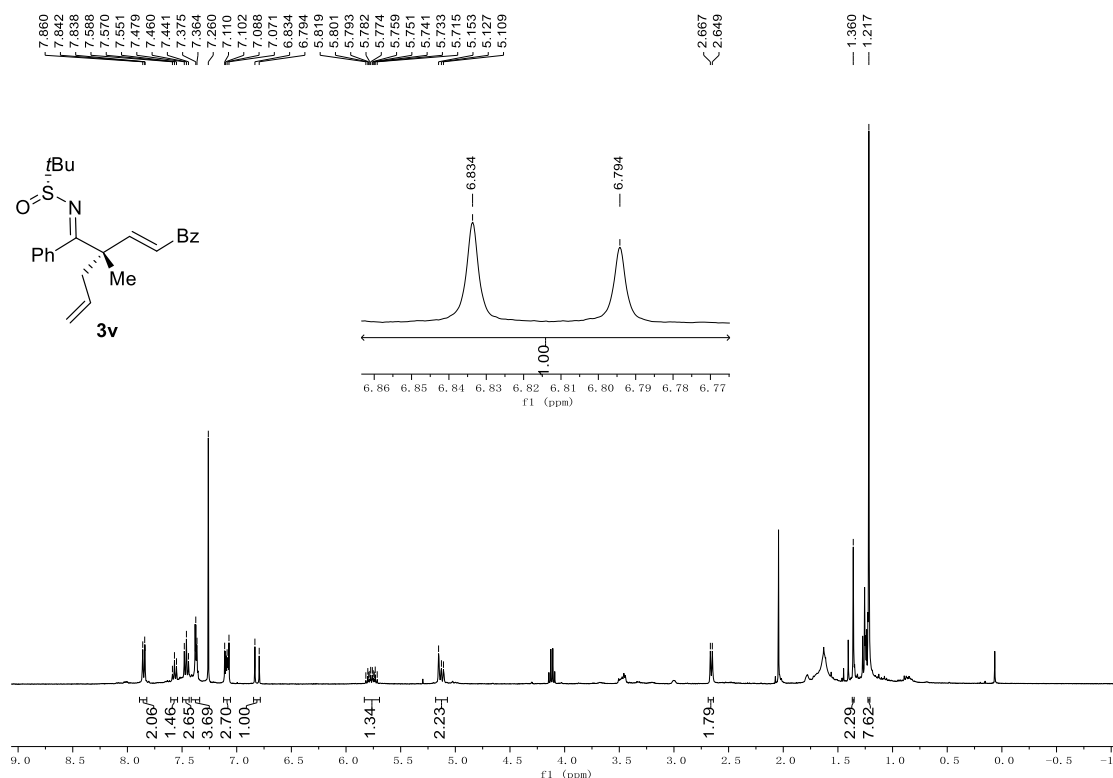

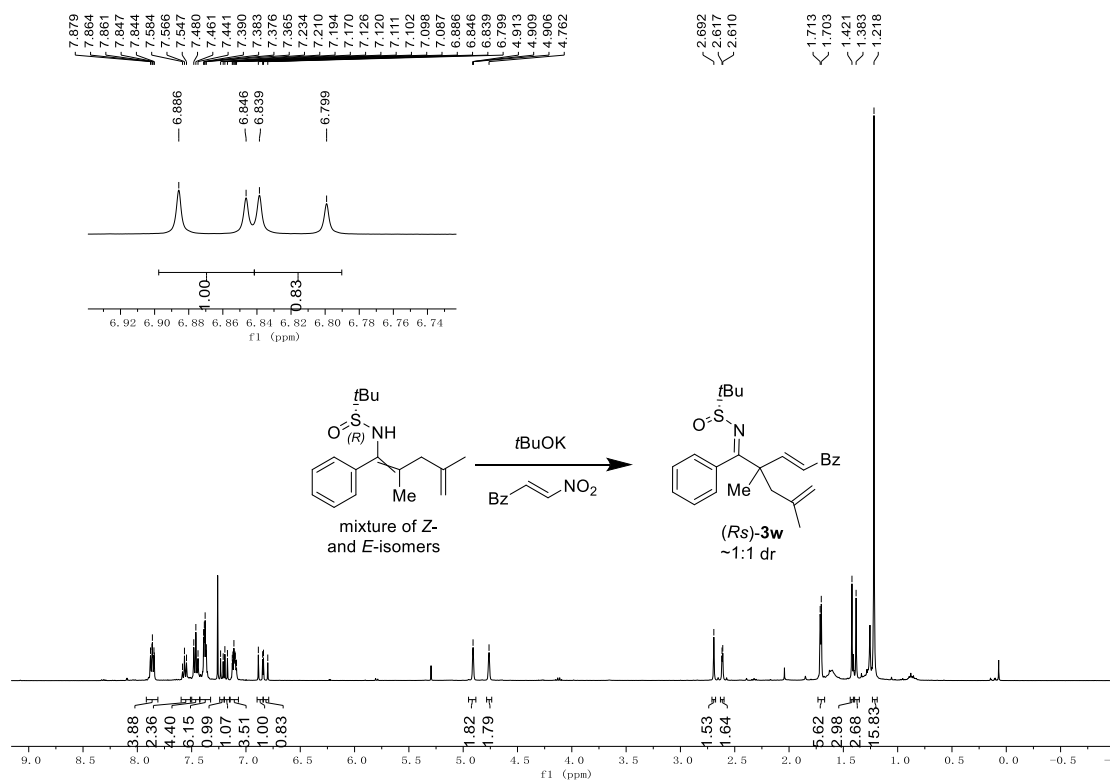

$^1\text{H}$  NMR spectrum ( $\text{CDCl}_3$ , 400 MHz) of  $(R_s)\text{-3w}$  with low diastereoselectivity (dr ~ 1:1) intentionally prepared using the corresponding enesulfonamide sample with low *Z/E* ratio

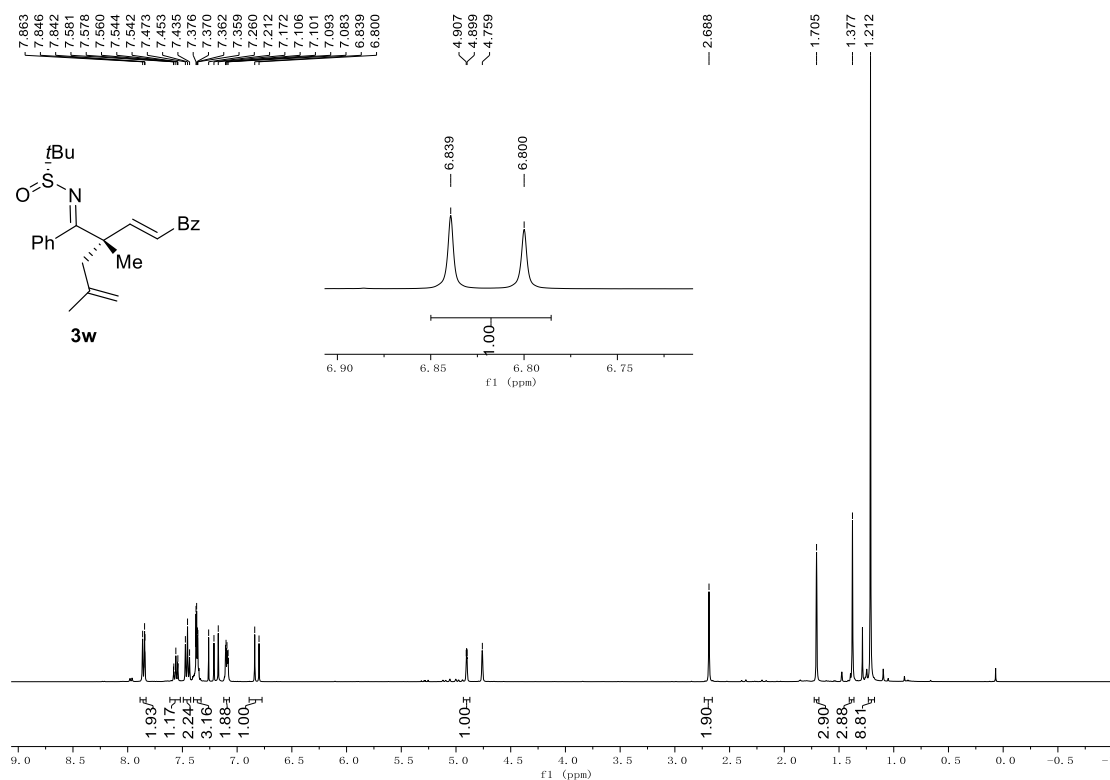

$^1\text{H}$  NMR spectrum ( $\text{CDCl}_3$ , 400 MHz) of the crude reaction mixture of  $\mathbf{3w}$  (dr > 20:1) (No observable presence of the minor diastereomer)

(*Rs*)-**3x**: HPLC conditions: Daicel Chiralcel IF-3 column, *n*-hexane/2-propanol = 90:10 (v/v), 1.0 mL/min, 254 nm, 40 °C.

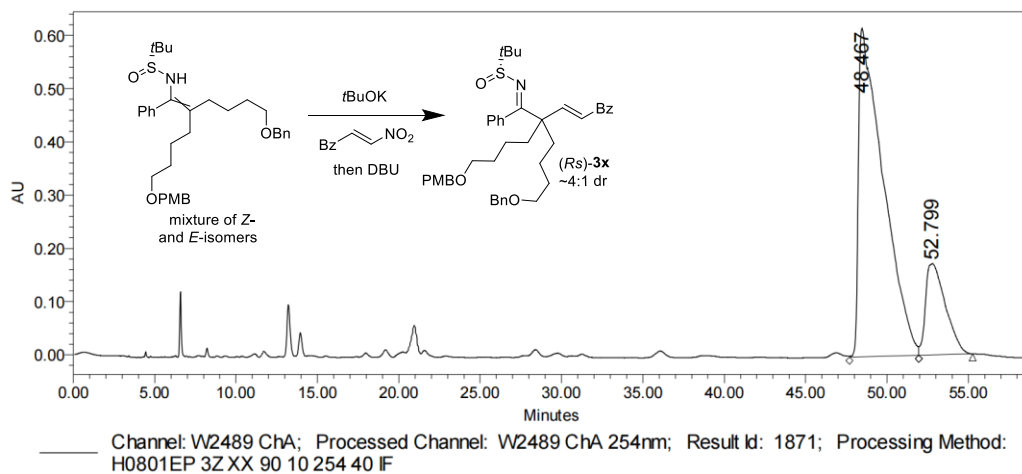

**Processed Channel Descr.: W2489 ChA 254nm**

|   | Processed Channel Descr. | RT     | Area     | % Area | Height |
|---|--------------------------|--------|----------|--------|--------|
| 1 | W2489 ChA 254nm          | 48.467 | 65035468 | 81.72  | 617112 |
| 2 | W2489 ChA 254nm          | 52.799 | 14547216 | 18.28  | 171377 |

HPLC chromatogram for dr determination of crude **3x**

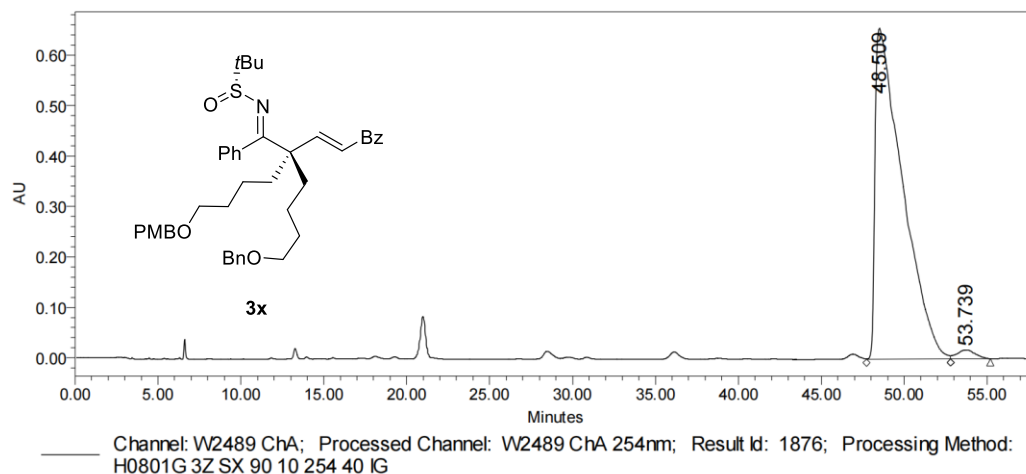

**Processed Channel Descr.: W2489 ChA 254nm**

|   | Processed Channel Descr. | RT     | Area     | % Area | Height |
|---|--------------------------|--------|----------|--------|--------|
| 1 | W2489 ChA 254nm          | 48.509 | 75171454 | 98.26  | 655263 |
| 2 | W2489 ChA 254nm          | 53.739 | 1332882  | 1.74   | 17637  |

(*R*s)-**3y**: HPLC conditions: Daicel Chiralcel IG-3 column, *n*-hexane/2-propanol = 85:15 (v/v), 1.0 mL/min, 254 nm, 40 °C

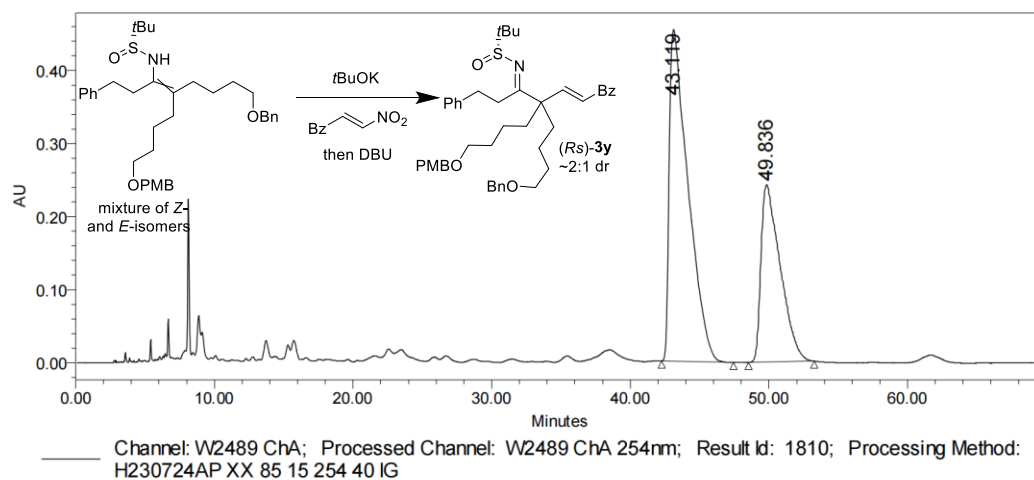

**Processed Channel Descr.: W2489 ChA 254nm**

|   | Processed Channel Descr. | RT     | Area     | % Area | Height |
|---|--------------------------|--------|----------|--------|--------|
| 1 | W2489 ChA 254nm          | 43.119 | 42708450 | 64.57  | 453901 |
| 2 | W2489 ChA 254nm          | 49.836 | 23431287 | 35.43  | 242546 |

HPLC chromatogram for dr determination of crude **3y**

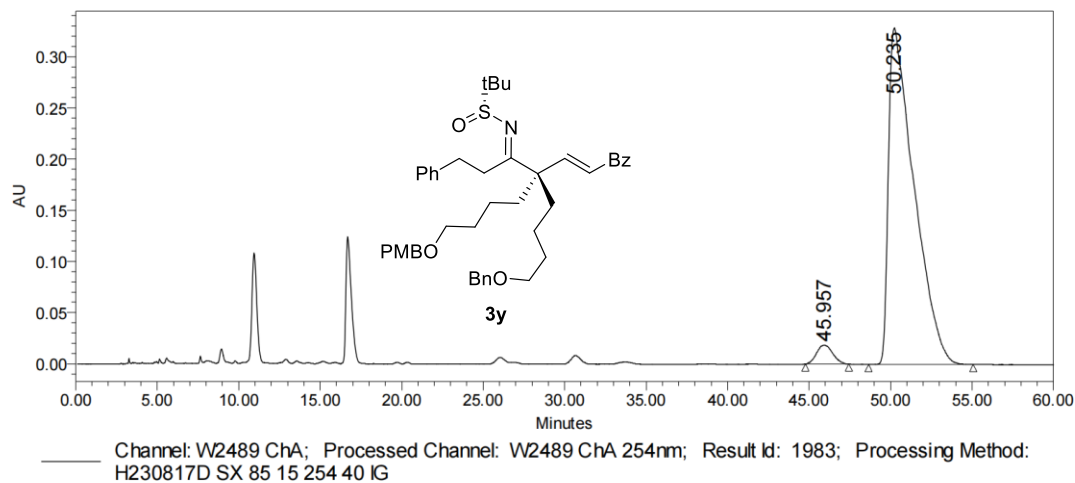

**Processed Channel Descr.: W2489 ChA 254nm**

|   | Processed Channel Descr. | RT     | Area     | % Area | Height |
|---|--------------------------|--------|----------|--------|--------|
| 1 | W2489 ChA 254nm          | 45.957 | 1269176  | 3.42   | 18305  |
| 2 | W2489 ChA 254nm          | 50.235 | 35797760 | 96.58  | 328886 |

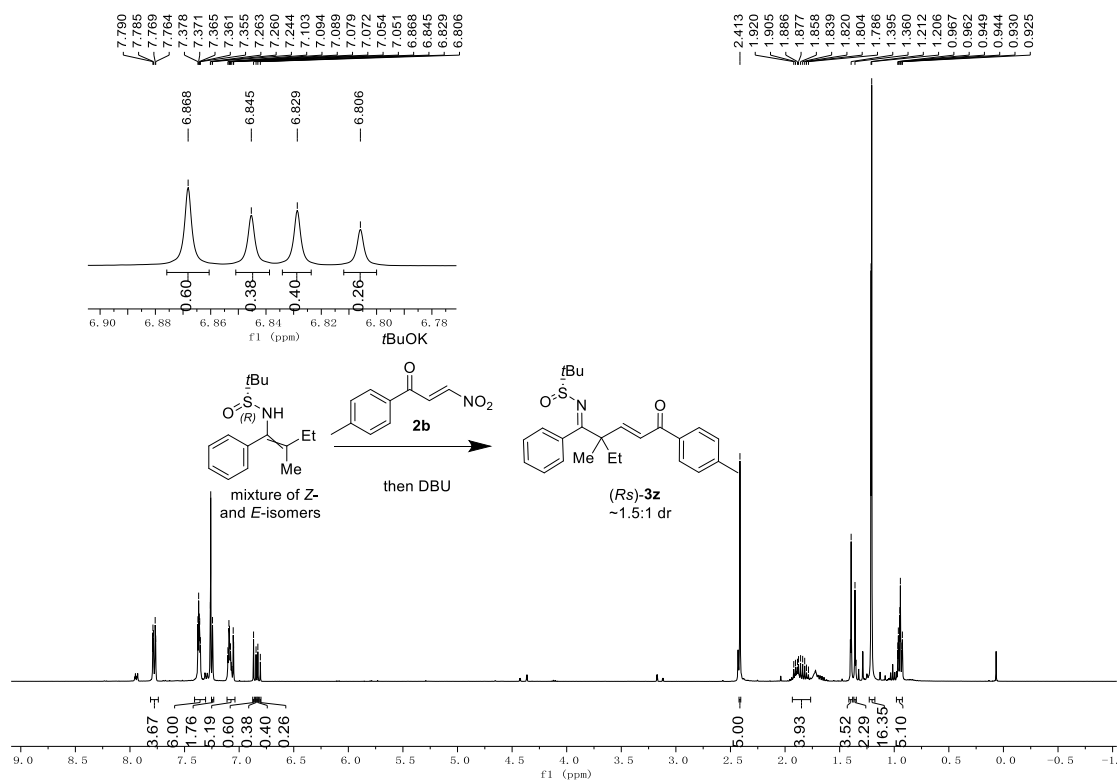

<sup>1</sup>H NMR spectrum (CDCl<sub>3</sub>, 400 MHz) of *(R<sub>s</sub>)-3z* with low diastereoselectivity (dr ~ 1.5:1) intentionally prepared using the corresponding enesulfonamide sample with low *Z/E* ratio

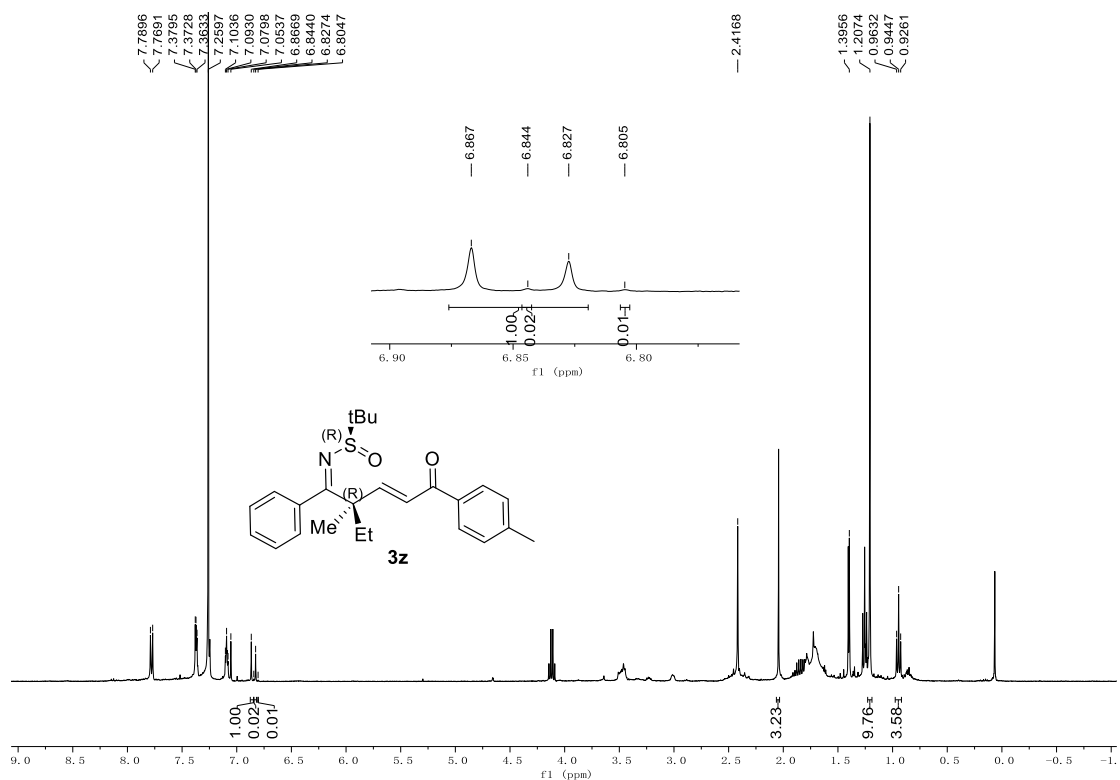

<sup>1</sup>H NMR spectrum (CDCl<sub>3</sub>, 400 MHz) of the crude reaction mixture of **3z** (dr ~ 33:1)



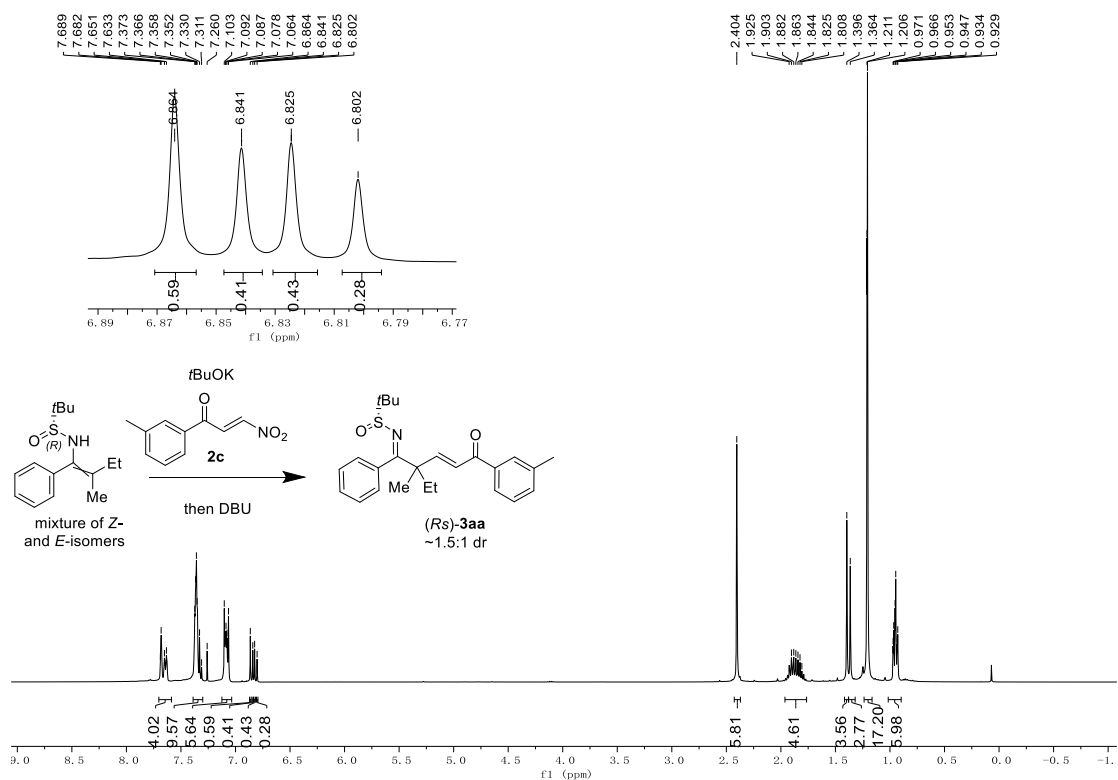

<sup>1</sup>H NMR spectrum (CDCl<sub>3</sub>, 400 MHz) of *(R\_s)*-**3aa** with low diastereoselectivity (dr ~ 1.5:1) intentionally prepared using the corresponding enesulfonamide sample with low *Z/E* ratio

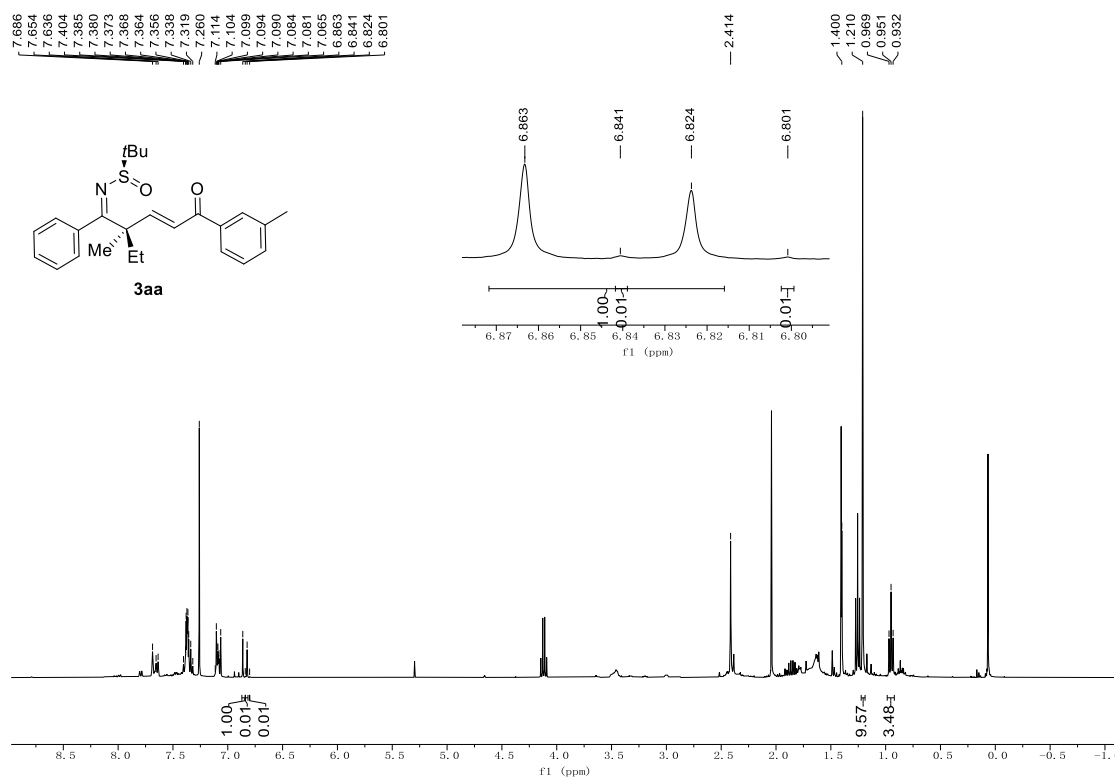

<sup>1</sup>H NMR spectrum (CDCl<sub>3</sub>, 400 MHz) of the crude reaction mixture of **3aa** (dr = 50:1)

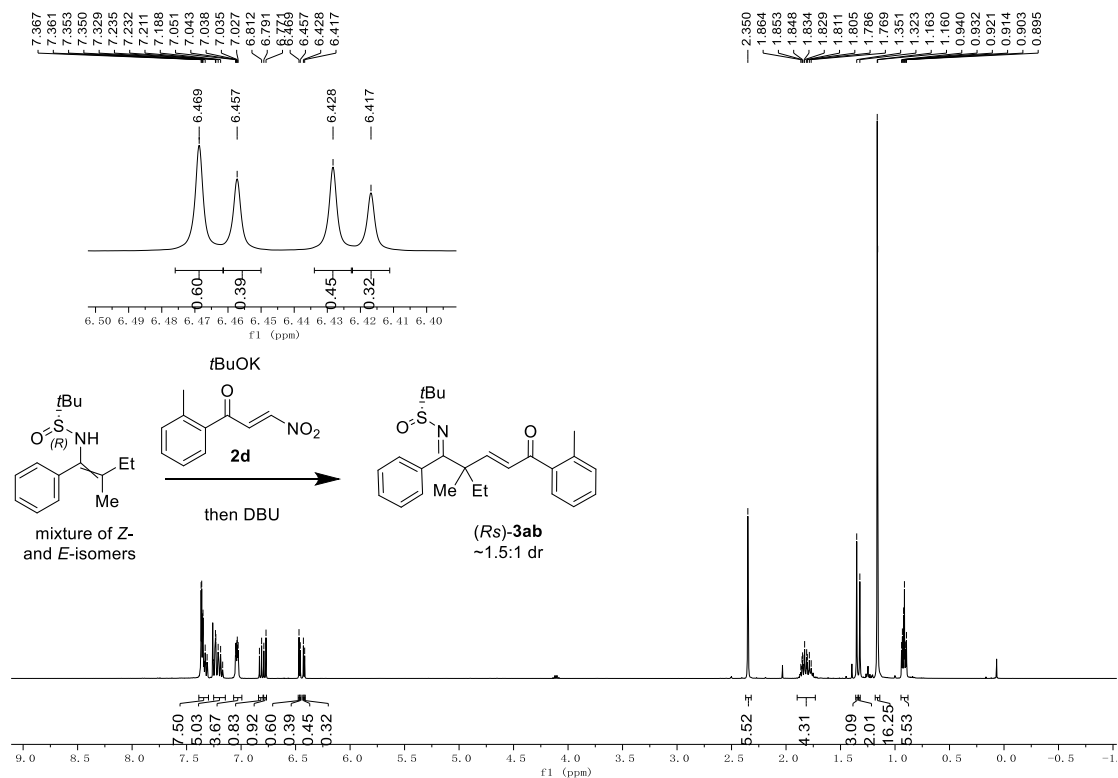

<sup>1</sup>H NMR spectrum (CDCl<sub>3</sub>, 400 MHz) of **(*R<sub>s</sub>*)-3ab** with low diastereoselectivity (dr ~ 1.5:1) intentionally prepared using the corresponding enesulfonamide sample with low *Z/E* ratio

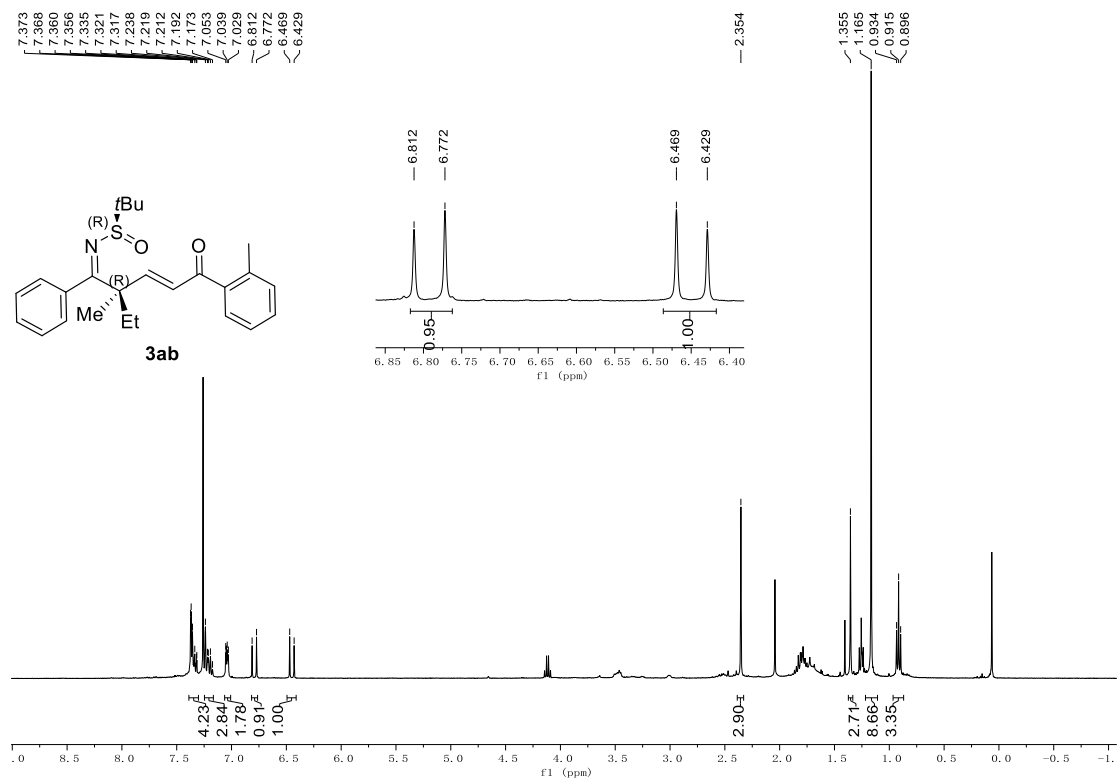

<sup>1</sup>H NMR spectrum (CDCl<sub>3</sub>, 400 MHz) of the crude reaction mixture of **3ab** (dr > 20:1) (No observable presence of the minor diastereomer)

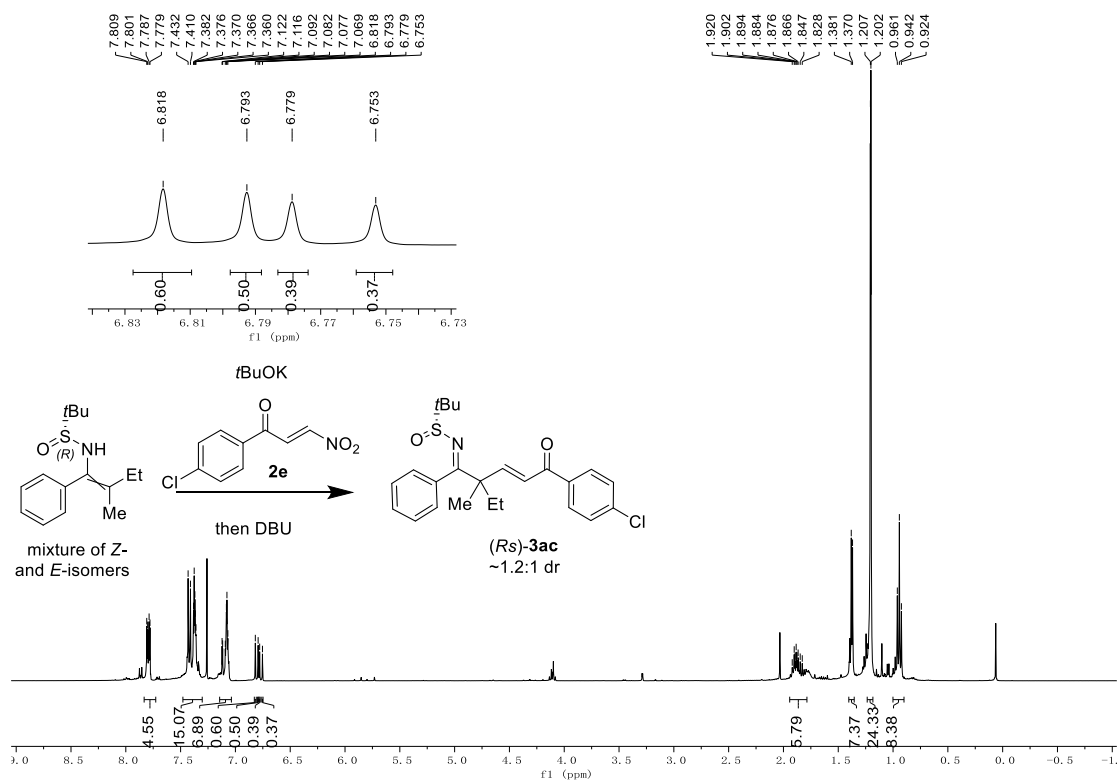

<sup>1</sup>H NMR spectrum (CDCl<sub>3</sub>, 400 MHz) of (*R*<sub>s</sub>)-**3ac** with low diastereoselectivity (dr ~ 1.2:1) intentionally prepared using the corresponding enesulfonamide sample with low *Z/E* ratio

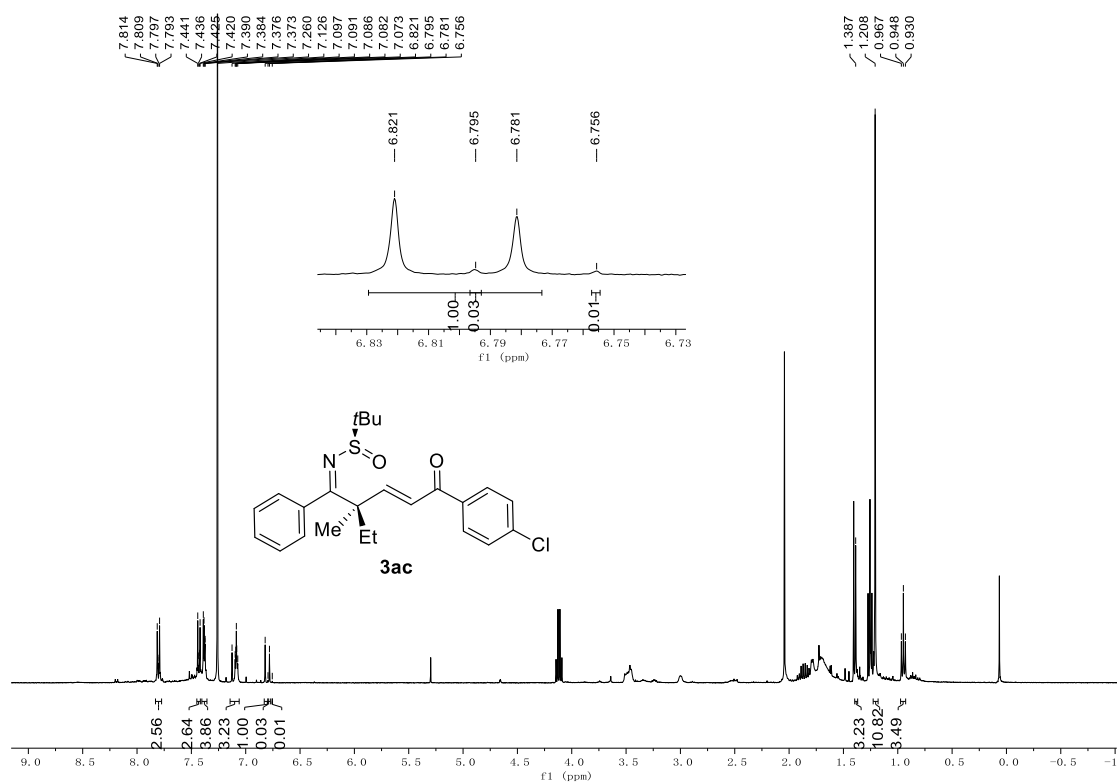

<sup>1</sup>H NMR spectrum (CDCl<sub>3</sub>, 400 MHz) of the crude reaction mixture of **3ac** (dr = 25:1)

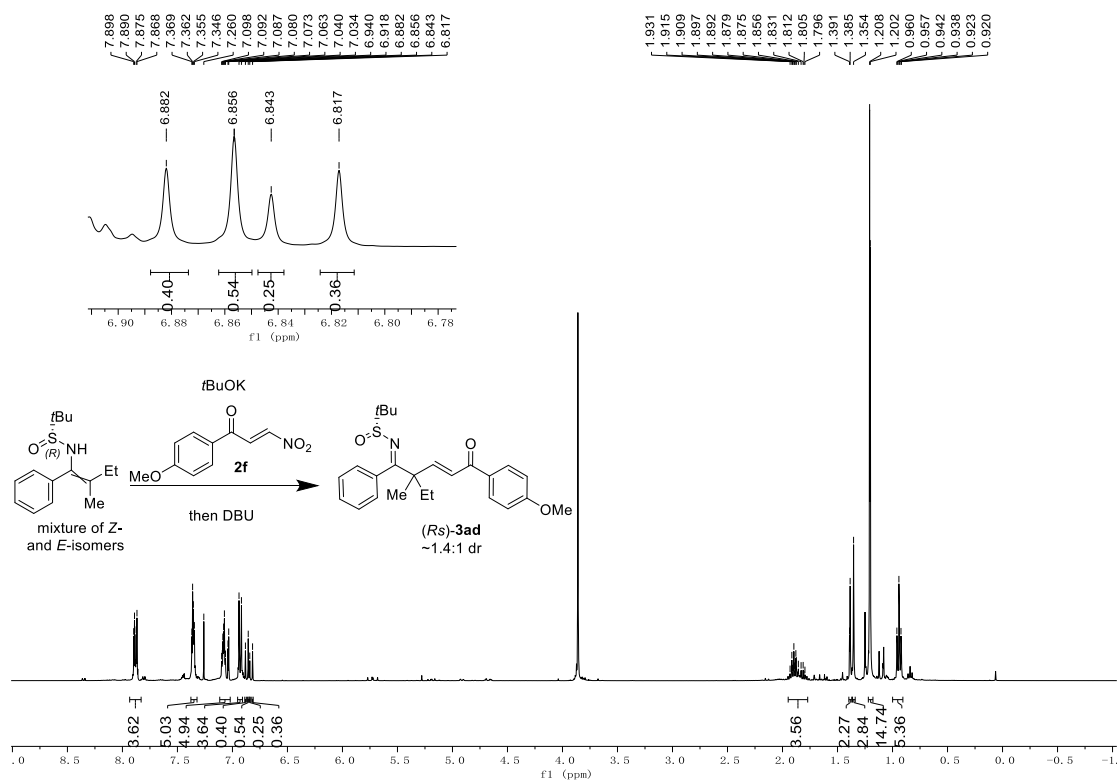

<sup>1</sup>H NMR spectrum (CDCl<sub>3</sub>, 400 MHz) of *(R<sub>s</sub>)-3ad* with low diastereoselectivity (dr ~ 1.4:1) intentionally prepared using the corresponding enesulfonamide sample with low *Z/E* ratio

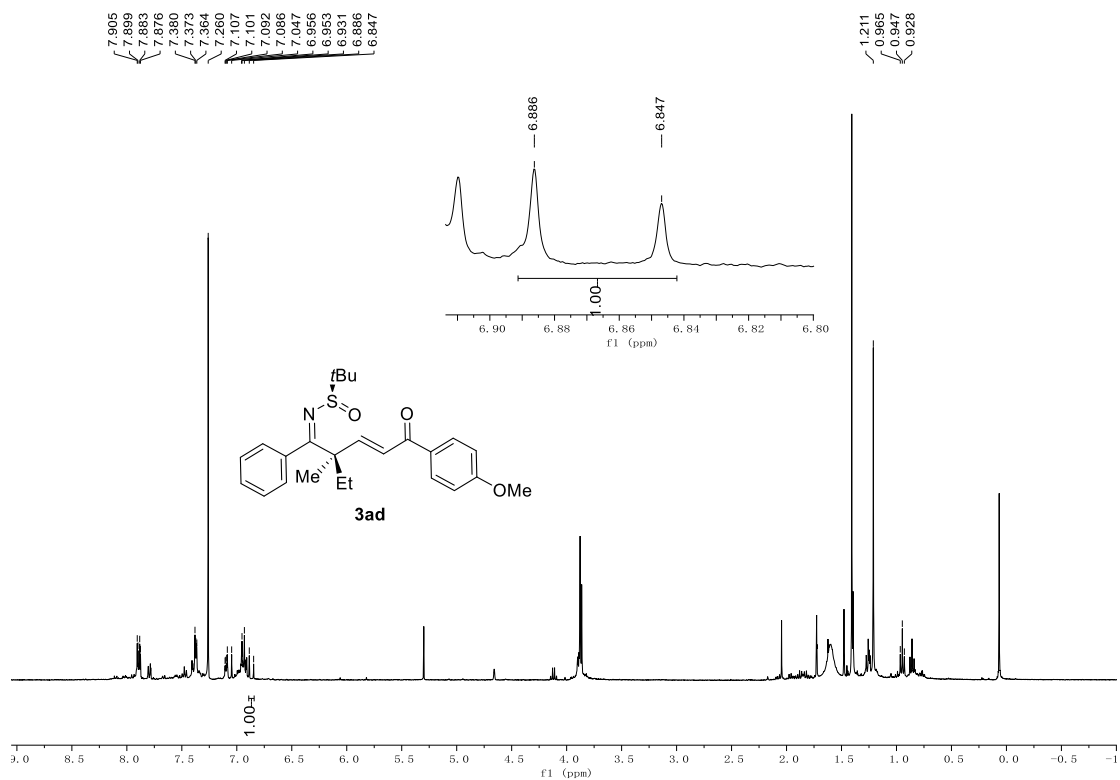

<sup>1</sup>H NMR spectrum (CDCl<sub>3</sub>, 400 MHz) of the crude reaction mixture of *(R<sub>s</sub>)-3ad* (dr > 20:1)

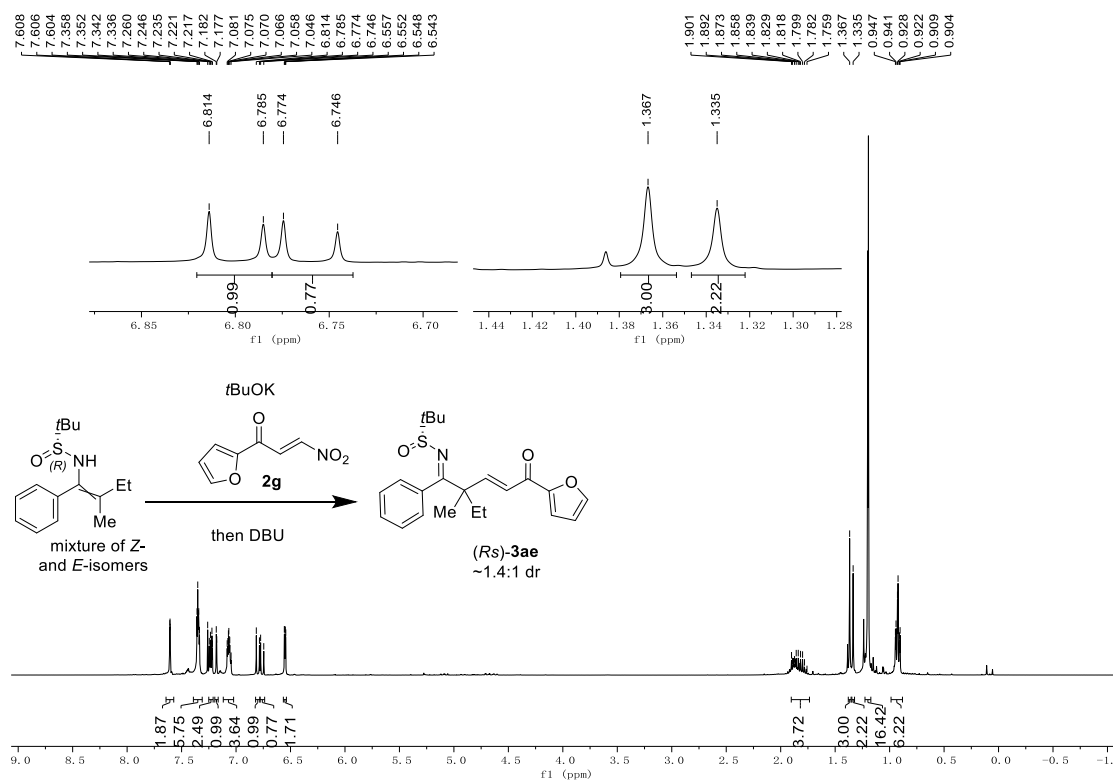

<sup>1</sup>H NMR spectrum (CDCl<sub>3</sub>, 400 MHz) of *(R<sub>s</sub>)-3ae* with low diastereoselectivity (dr ~ 1.4:1) intentionally prepared using the corresponding enesulfonamide sample with low *Z/E* ratio

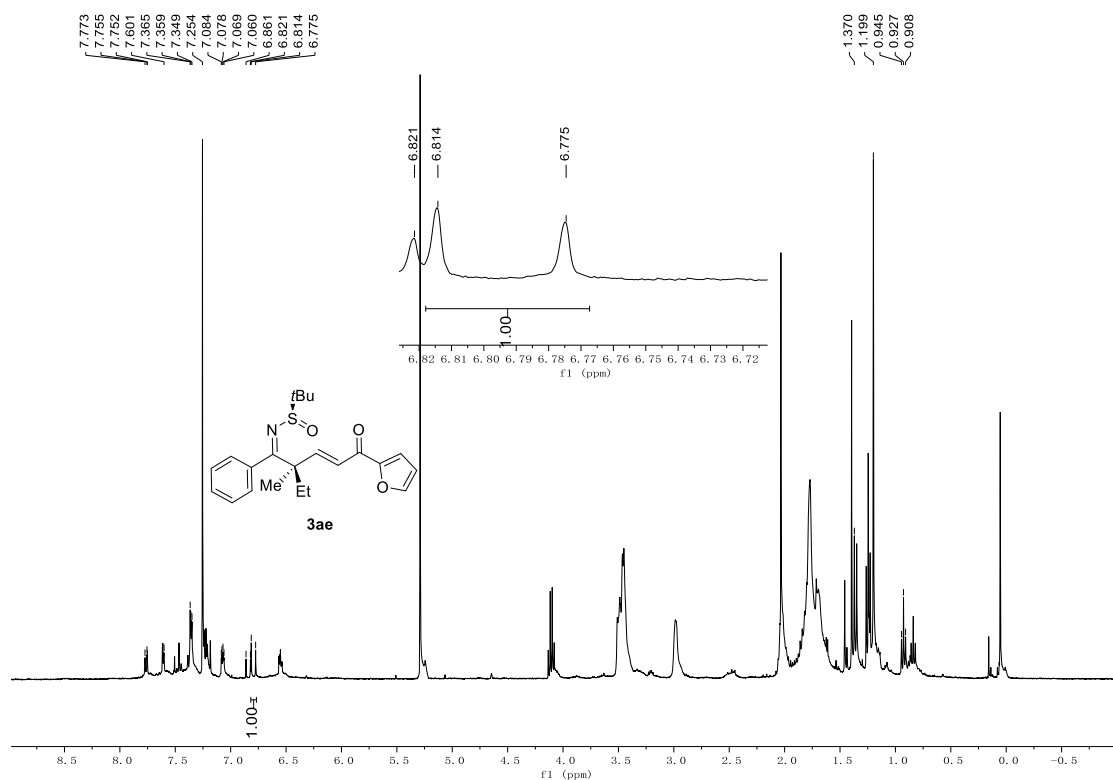

<sup>1</sup>H NMR spectrum (CDCl<sub>3</sub>, 400 MHz) of the crude reaction mixture of **3ae** (dr > 20:1)

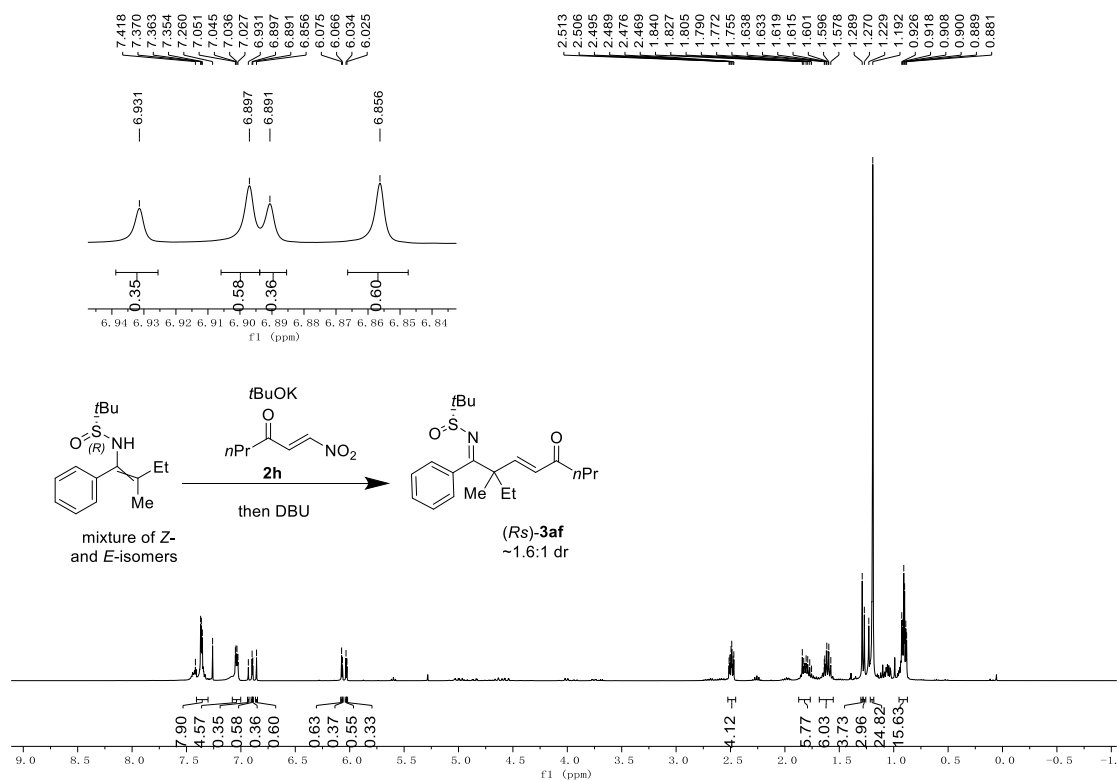

<sup>1</sup>H NMR spectrum (CDCl<sub>3</sub>, 400 MHz) of **(*R*<sub>s</sub>)-3af** with low diastereoselectivity (dr ~ 1:1) intentionally prepared using the corresponding enesulfonamide sample with low *Z/E* ratio

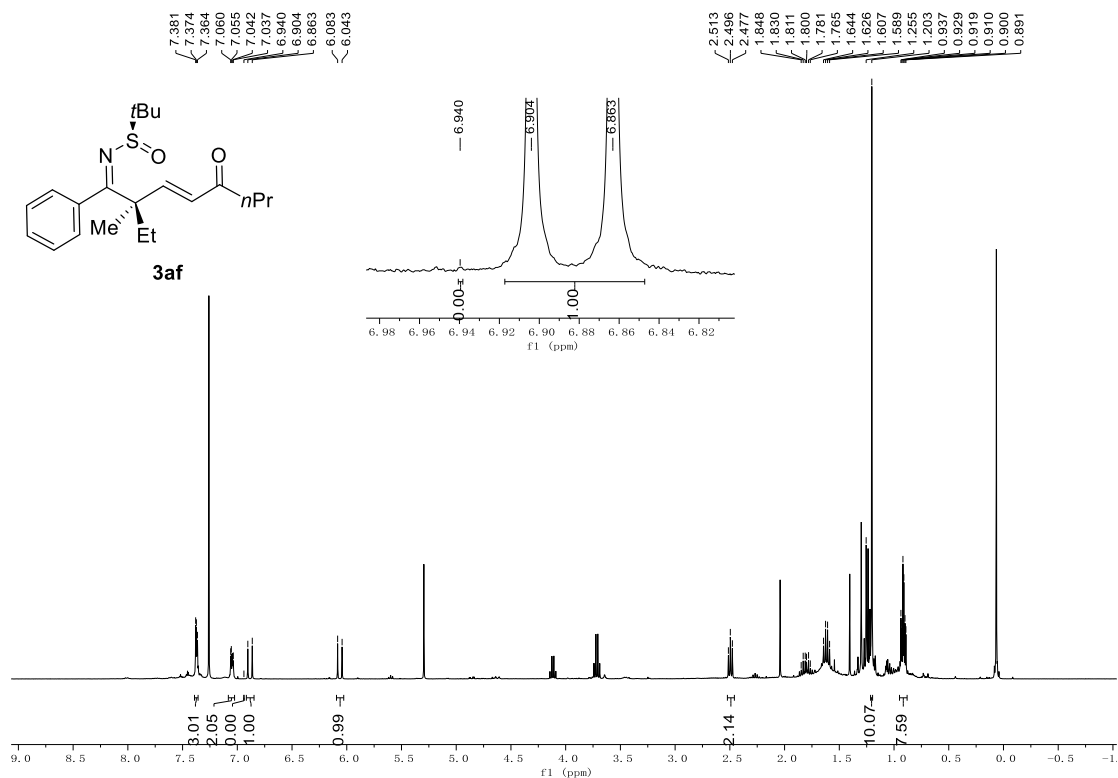

<sup>1</sup>H NMR spectrum (CDCl<sub>3</sub>, 400 MHz) of the crude reaction mixture of **3af** (dr > 20:1)

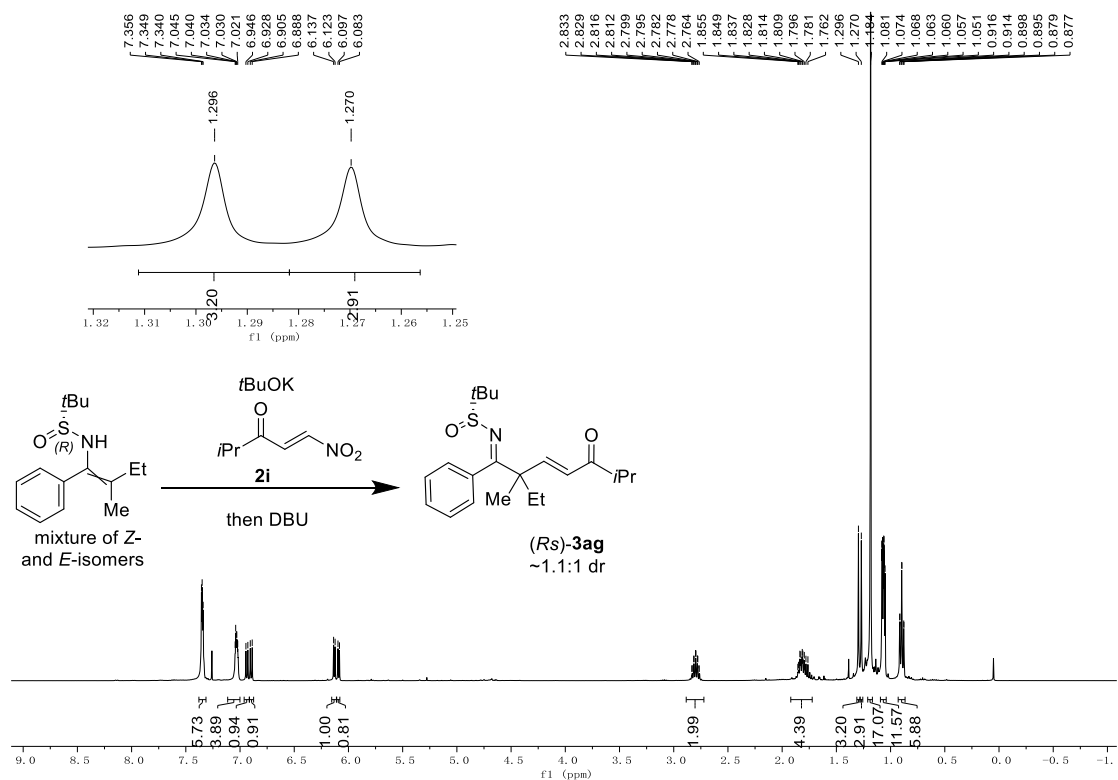

<sup>1</sup>H NMR spectrum (CDCl<sub>3</sub>, 400 MHz) of (*R<sub>s</sub>*)-**3ag** with low diastereoselectivity (dr ~ 1.1:1) intentionally prepared using the corresponding enesulfonamide sample with low *Z/E* ratio

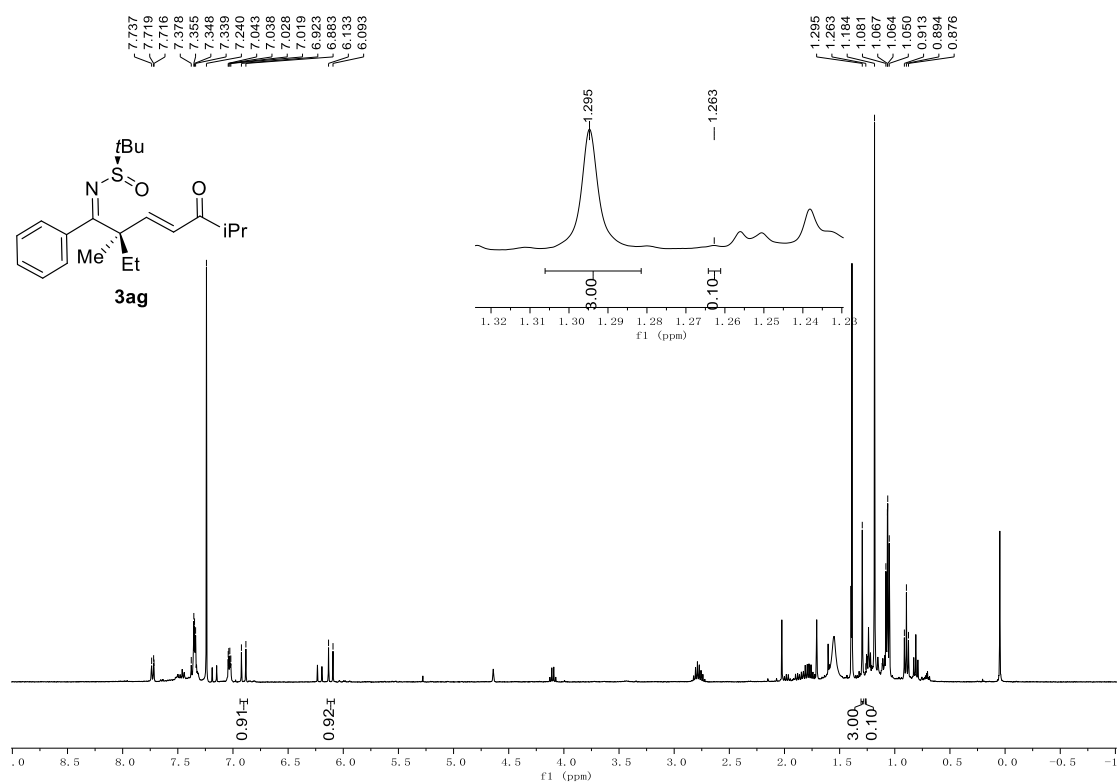

<sup>1</sup>H NMR spectrum (CDCl<sub>3</sub>, 400 MHz) of the crude reaction mixture of **3ag** (dr ~ 30:1)

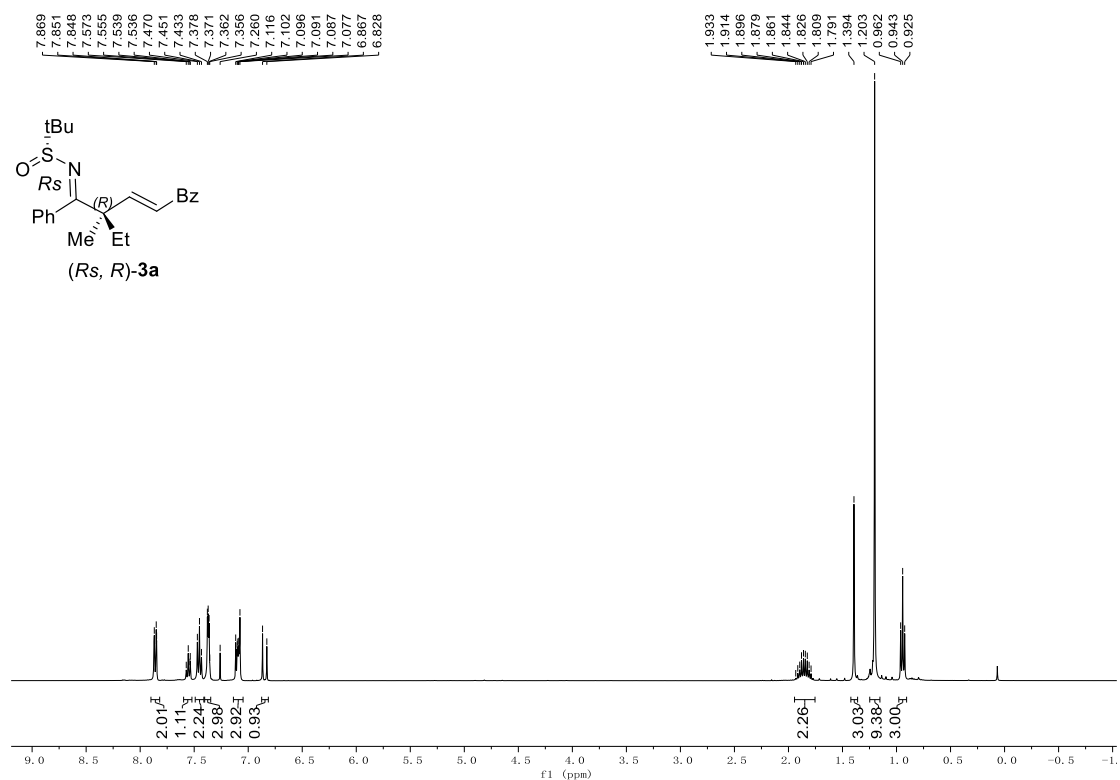

<sup>1</sup>H NMR spectrum (CDCl<sub>3</sub>, 400 MHz) of the diastereomer (*R*<sub>s</sub>, *R*)-3a that was used to identify the diagnostic peak(s) of the minor diastereomer

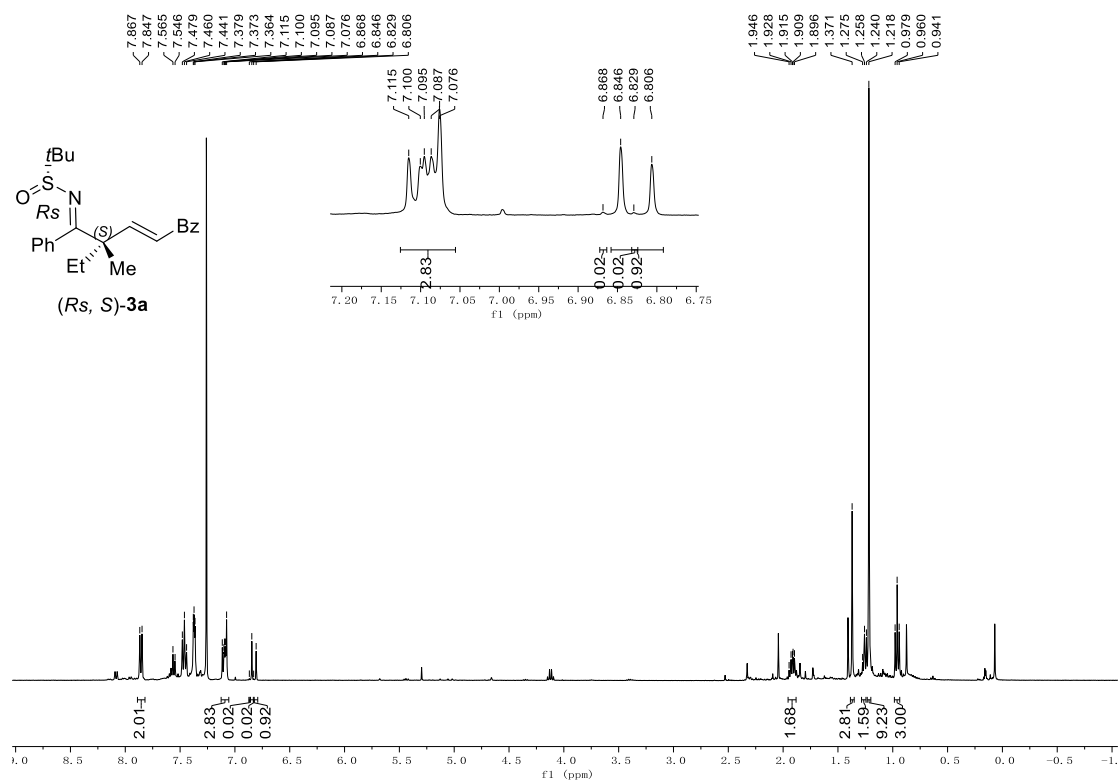

<sup>1</sup>H NMR spectrum (CDCl<sub>3</sub>, 400 MHz) of the crude reaction mixture of (*R*<sub>s</sub>, *S*)-3a (dr >20:1;

Scheme 5)





<sup>1</sup>H NMR spectrum (CDCl<sub>3</sub>, 400 MHz) of the diastereomer **(Ss, R)-3a** that was used to identify the diagnostic peak(s) of the minor diastereomer

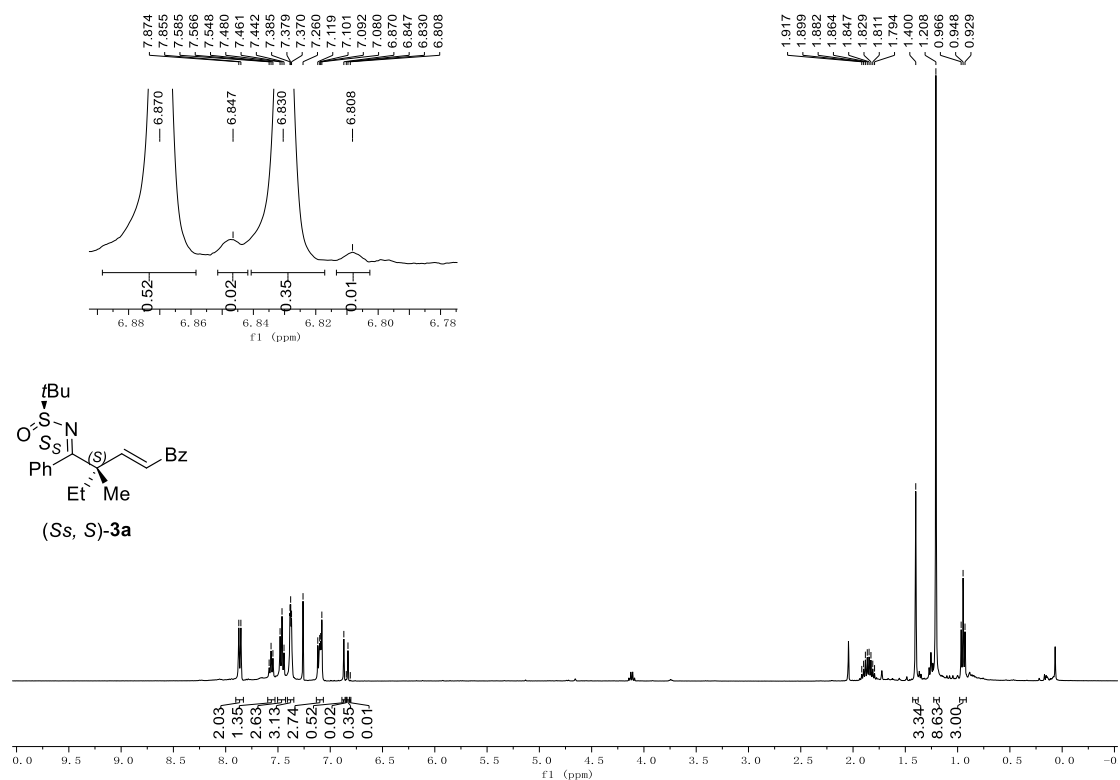

<sup>1</sup>H NMR spectrum (CDCl<sub>3</sub>, 400 MHz) of the crude reaction mixture of **(Ss, S)-3a** (dr > 20:1;

Scheme 5)



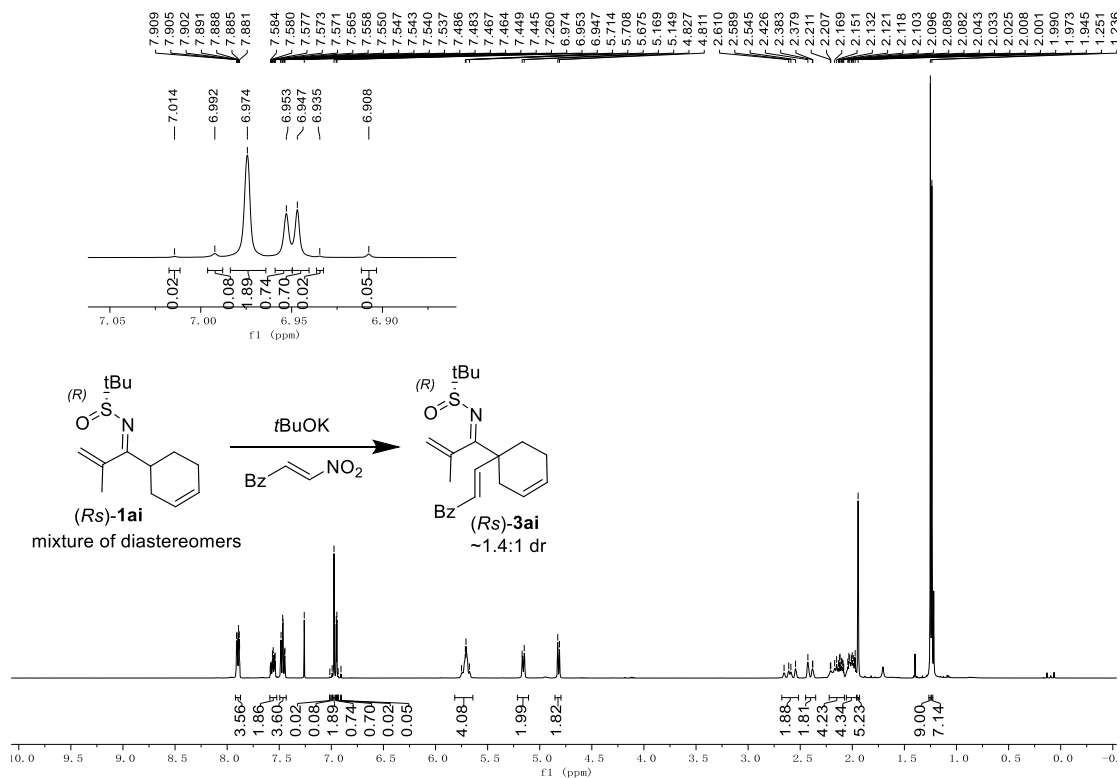

<sup>1</sup>H NMR spectrum of the purified mixture of inseparable diastereomers of *(R<sub>s</sub>, 2S)-3ai* and *(R<sub>s</sub>, 2R)-3ai* (~1.4:1 dr) (this low dr sample was intentionally prepared by using diastereomeric mixture of *N-t*Bs ketimine *(R<sub>s</sub>, 2S)-1ai* and *(R<sub>s</sub>, 2R)-1ai* as the starting material in order to identify the diagnostic peak(s) of the minor diastereomer by <sup>1</sup>H NMR analysis)

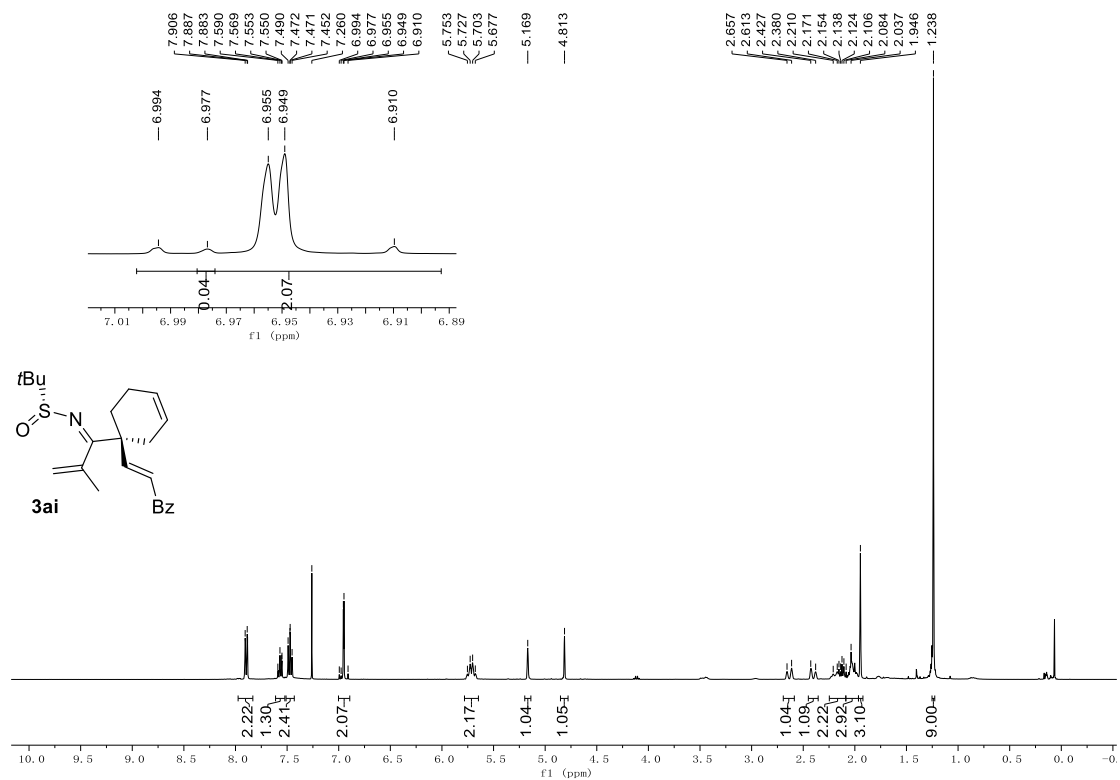

<sup>1</sup>H NMR spectrum (CDCl<sub>3</sub>, 400 MHz) of the crude reaction mixture of **3ai** (dr > 20:1)

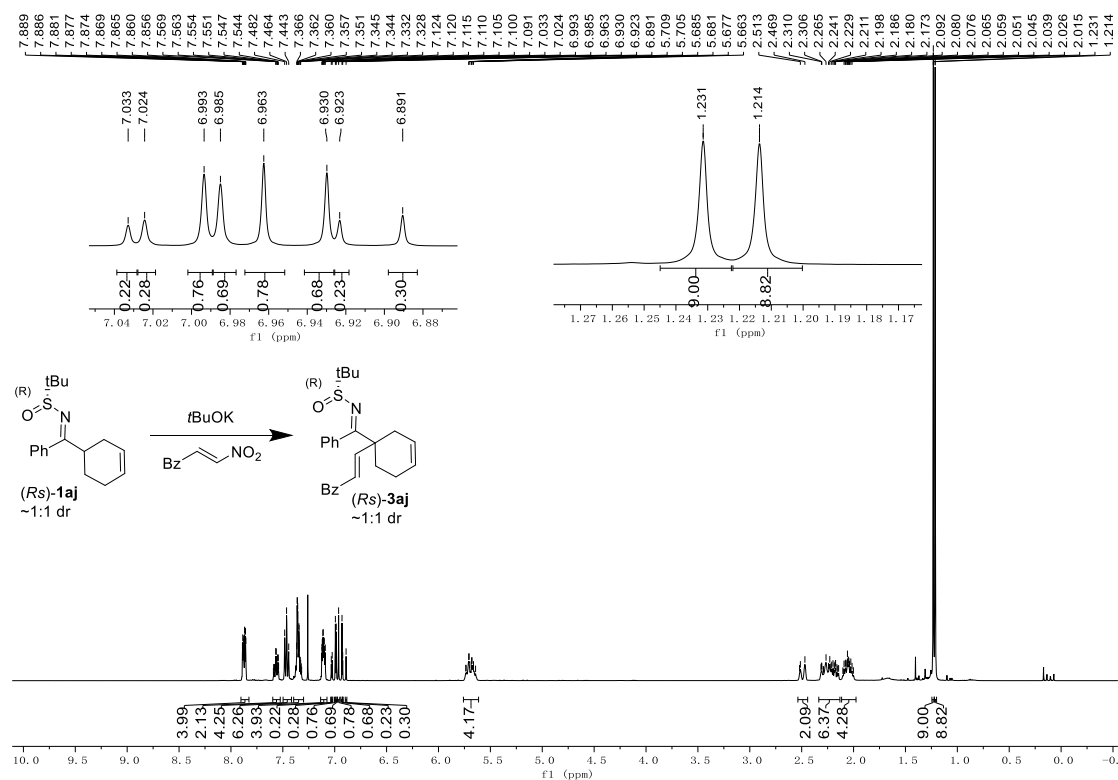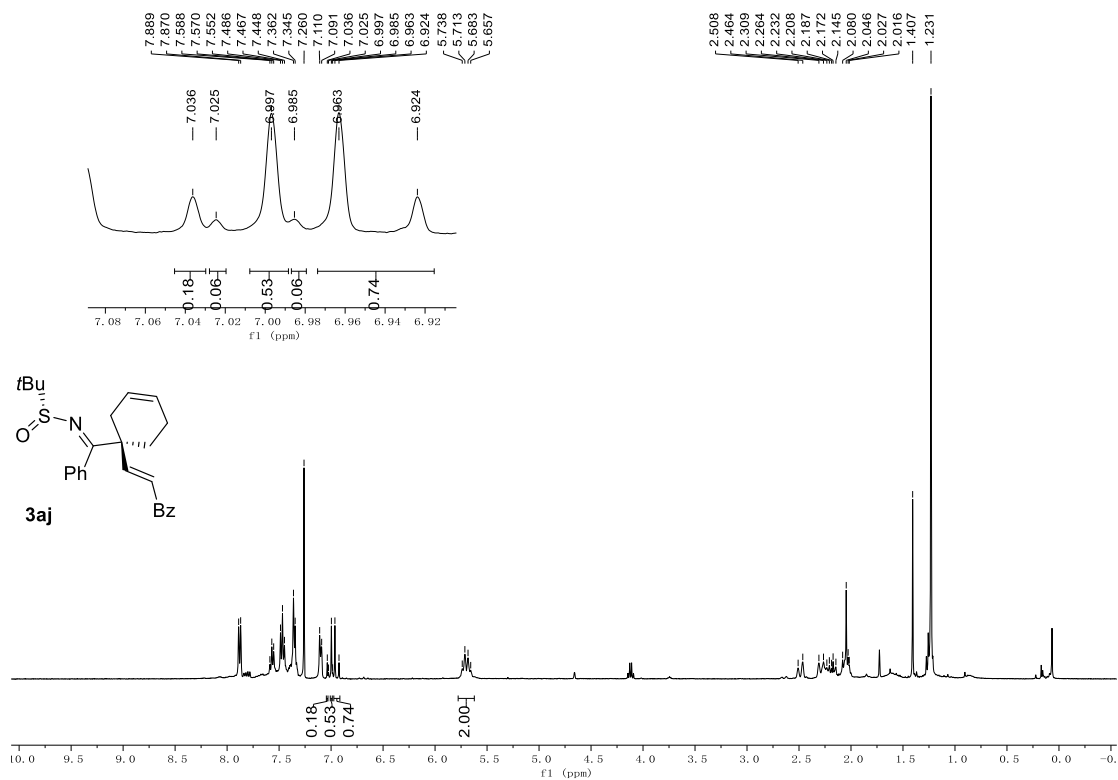

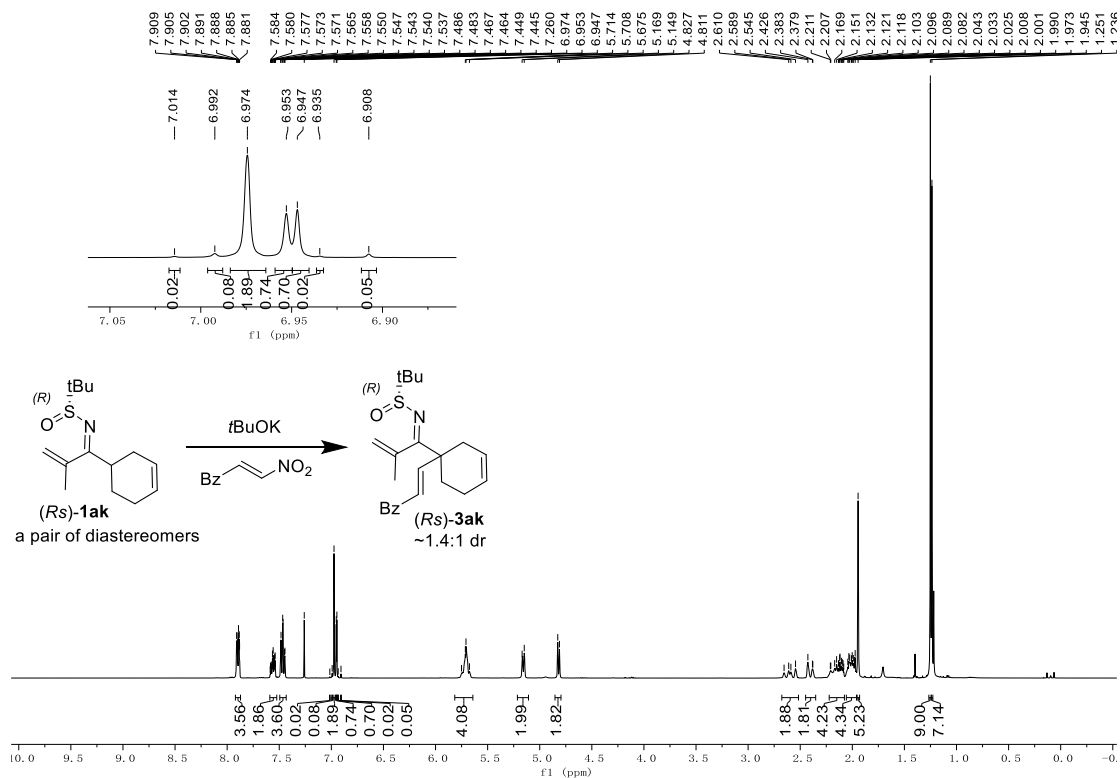

<sup>1</sup>H NMR spectrum of the purified mixture of inseparable diastereomers of (*R<sub>s</sub>*, 2*S*)-**3ak** and (*R<sub>s</sub>*, 2*R*)-**3ak** (~1.4:1 dr) (this low dr sample was intentionally prepared by using ~1:1 diastereomeric mixture of *N*-tBS ketimine (*R<sub>s</sub>*, 2*S*)-**1ak** and (*R<sub>s</sub>*, 2*R*)-**1ak** as the starting material in order to identify the diagnostic peak(s) of the minor diastereomer by <sup>1</sup>H NMR analysis; note: **3ai** and **3ak** is a pair of diastereomers, see Scheme 5)

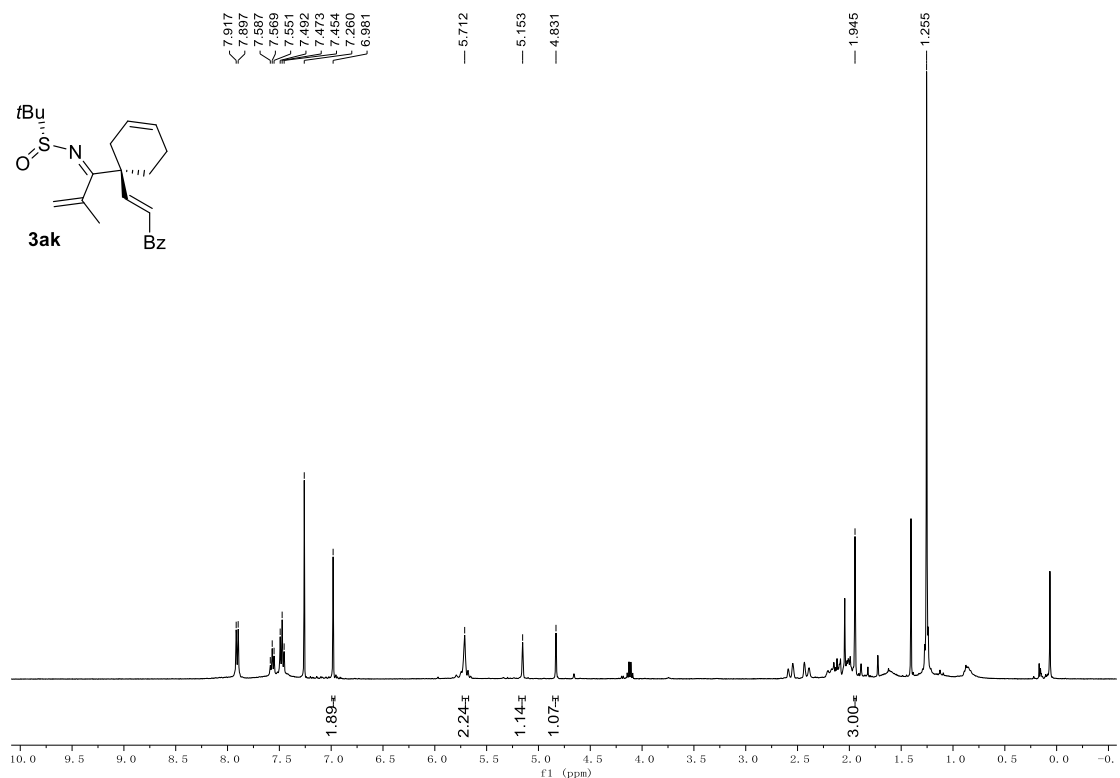

<sup>1</sup>H NMR spectrum (CDCl<sub>3</sub>, 400 MHz) of the crude reaction mixture of **3ak** (dr > 20:1)

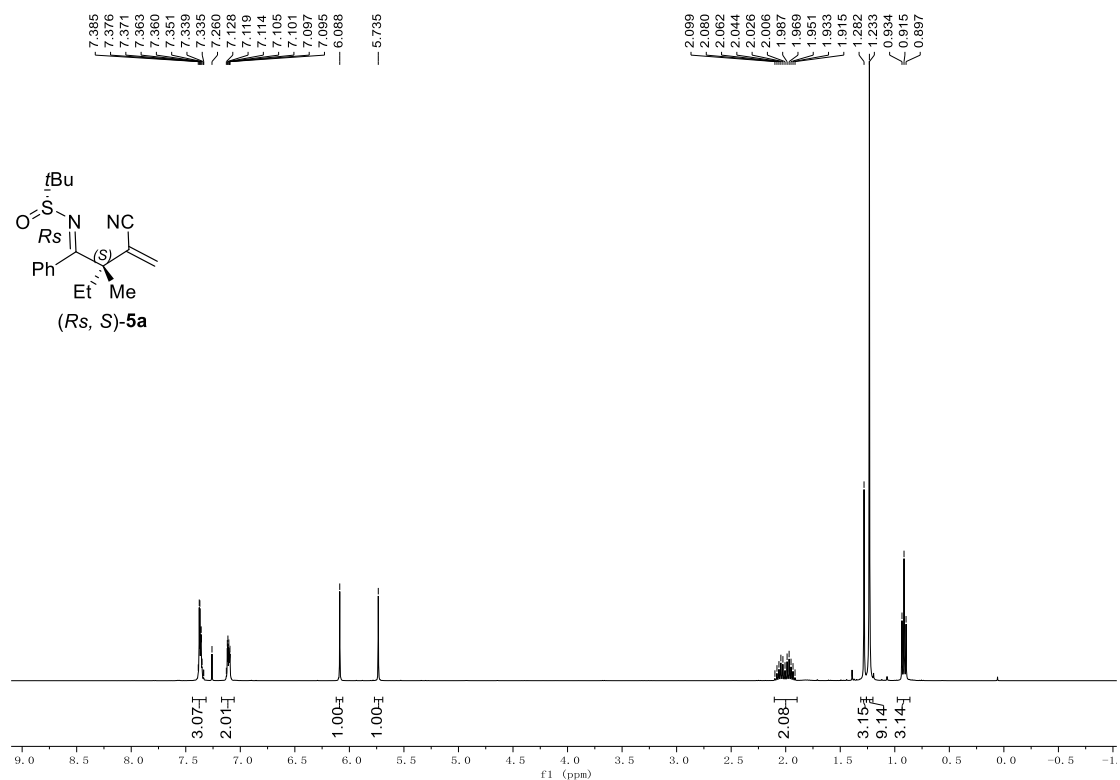

$^1\text{H}$  NMR spectrum ( $\text{CDCl}_3$ , 400 MHz) of the diastereomer (*R<sub>s</sub>*, *S*)-**5a** that was used as a control sample to identify the diagnostic peak(s) of the minor diastereomer

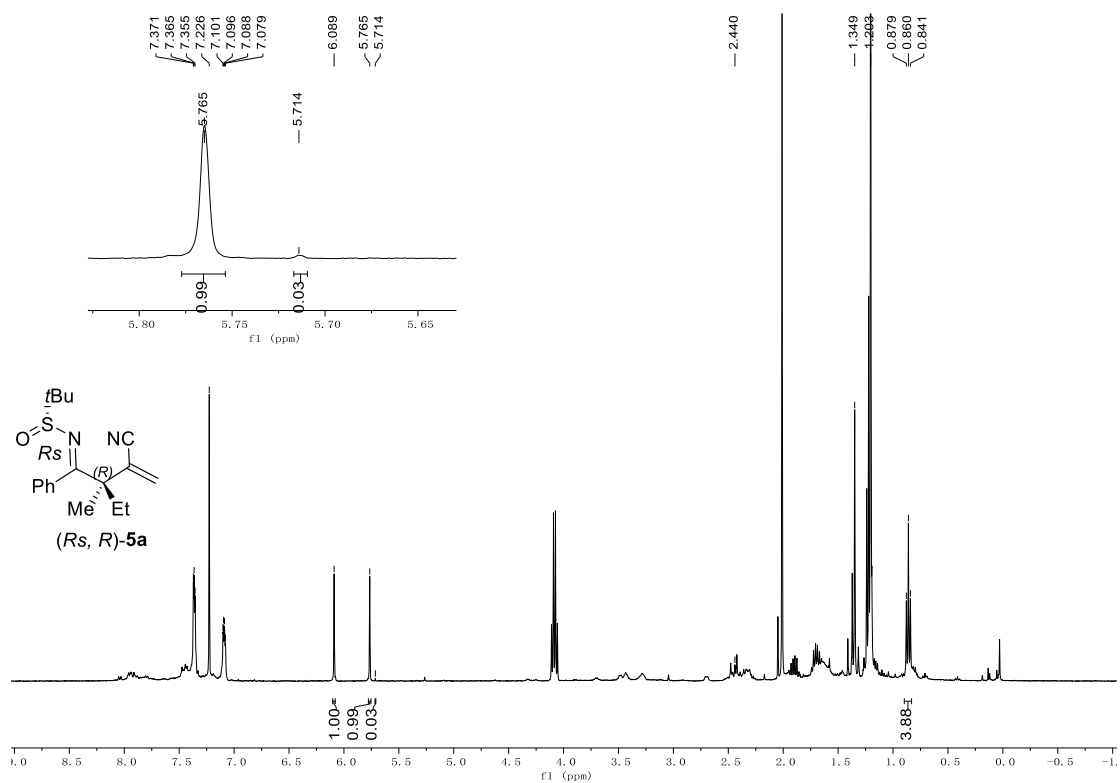

$^1\text{H}$  NMR spectrum ( $\text{CDCl}_3$ , 400 MHz) of the crude reaction mixture of (*R<sub>s</sub>*, *R*)-**5a** (dr > 20:1; 0.1 mmol scale)

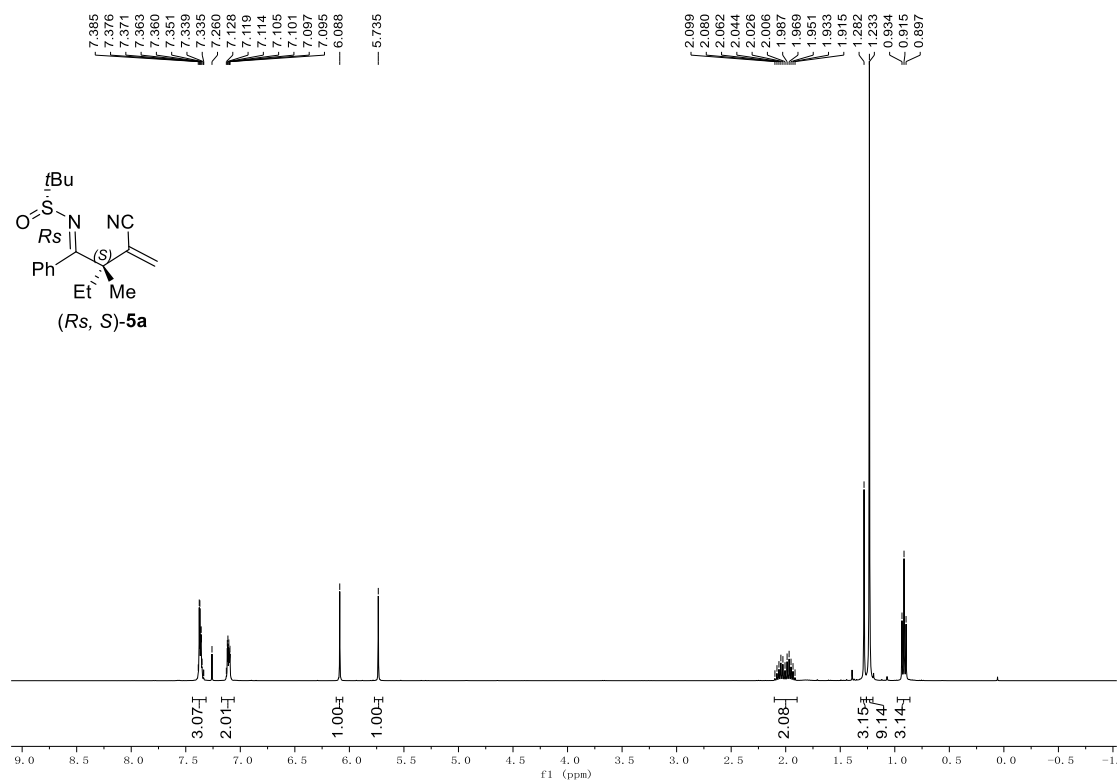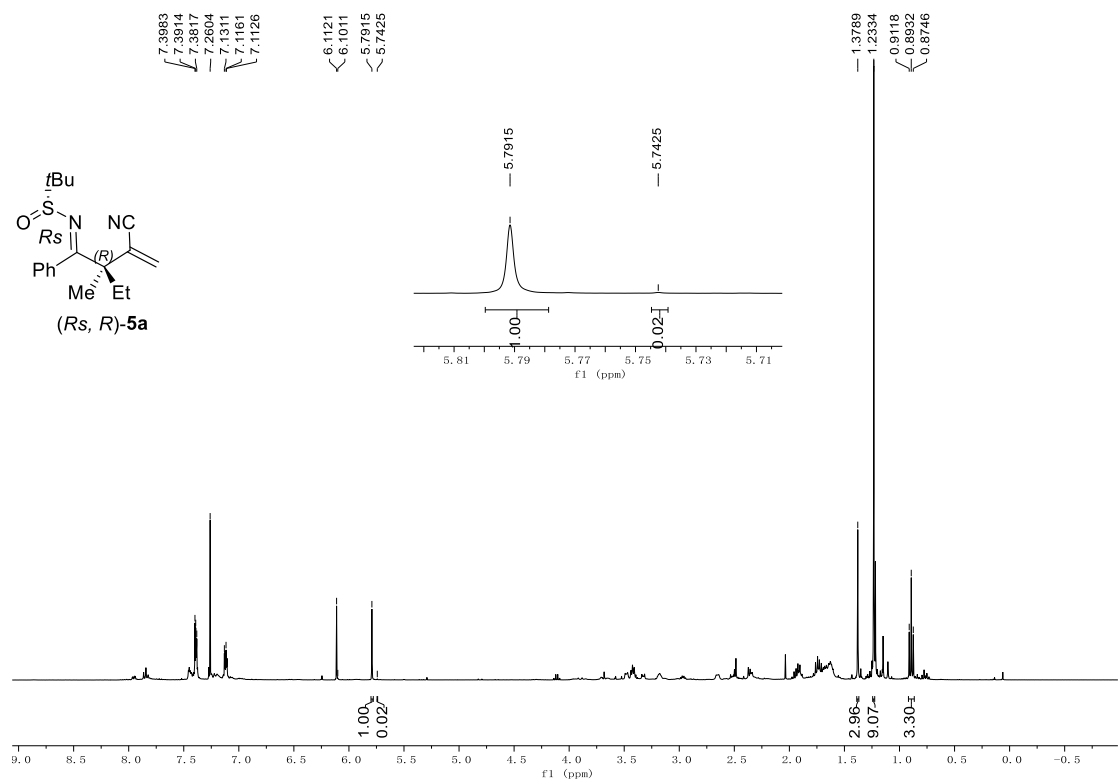

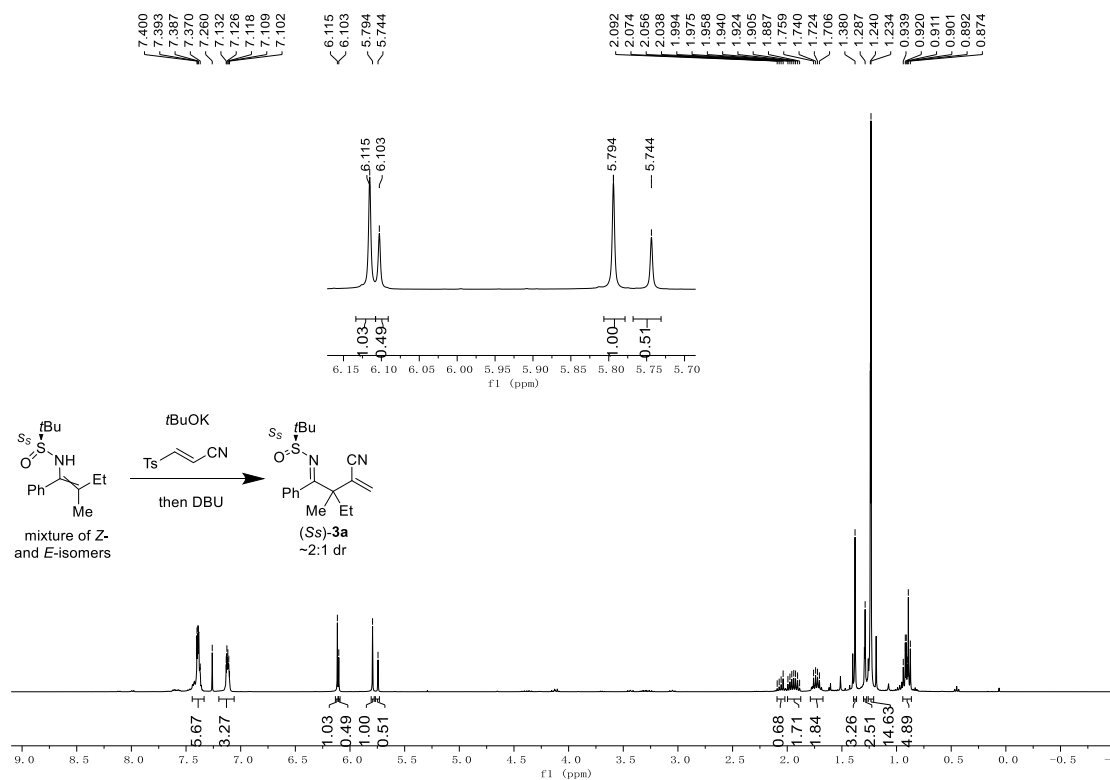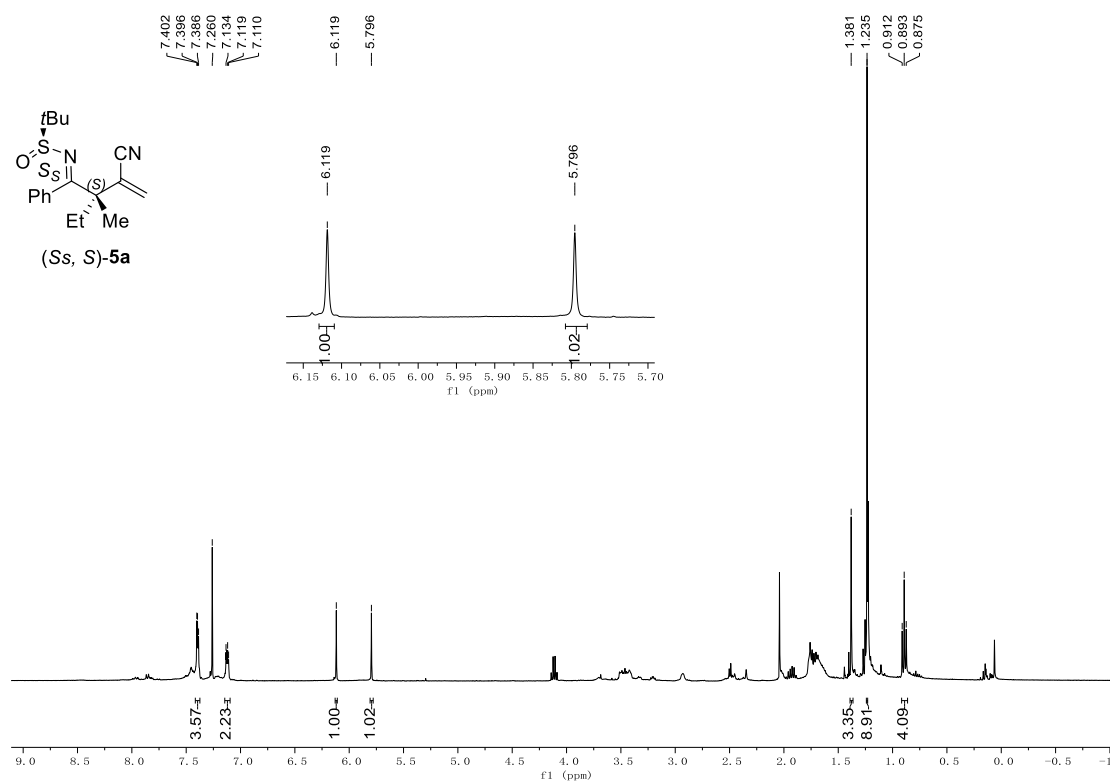



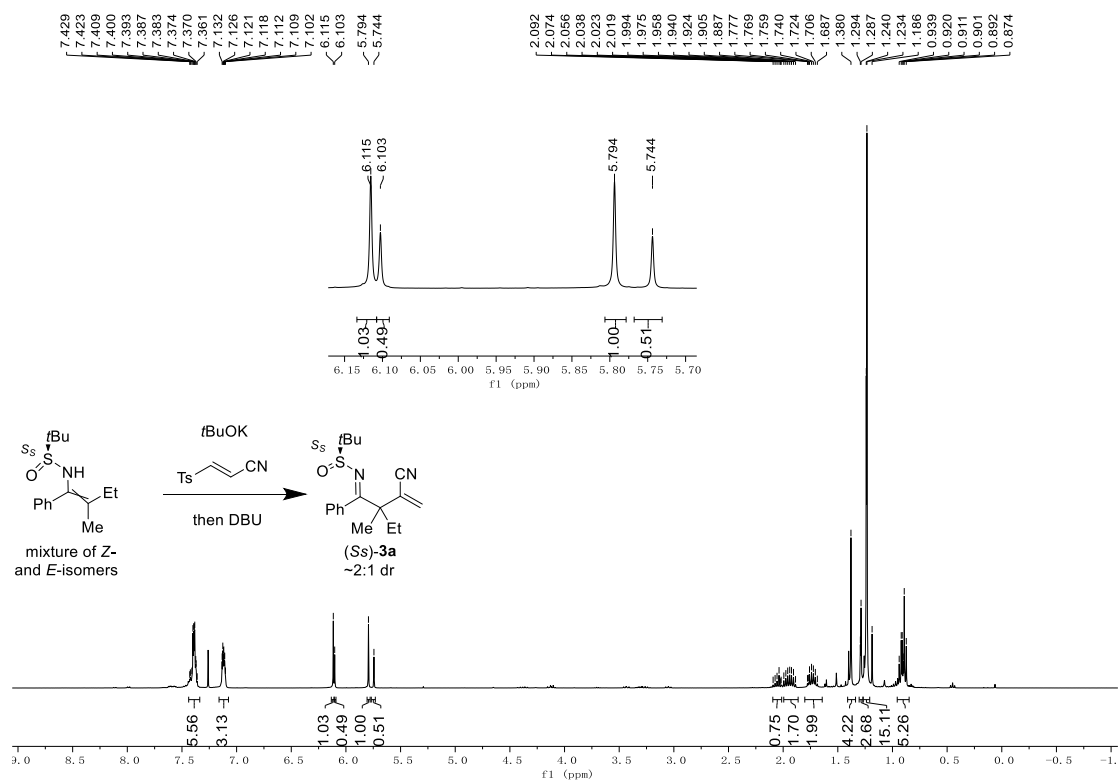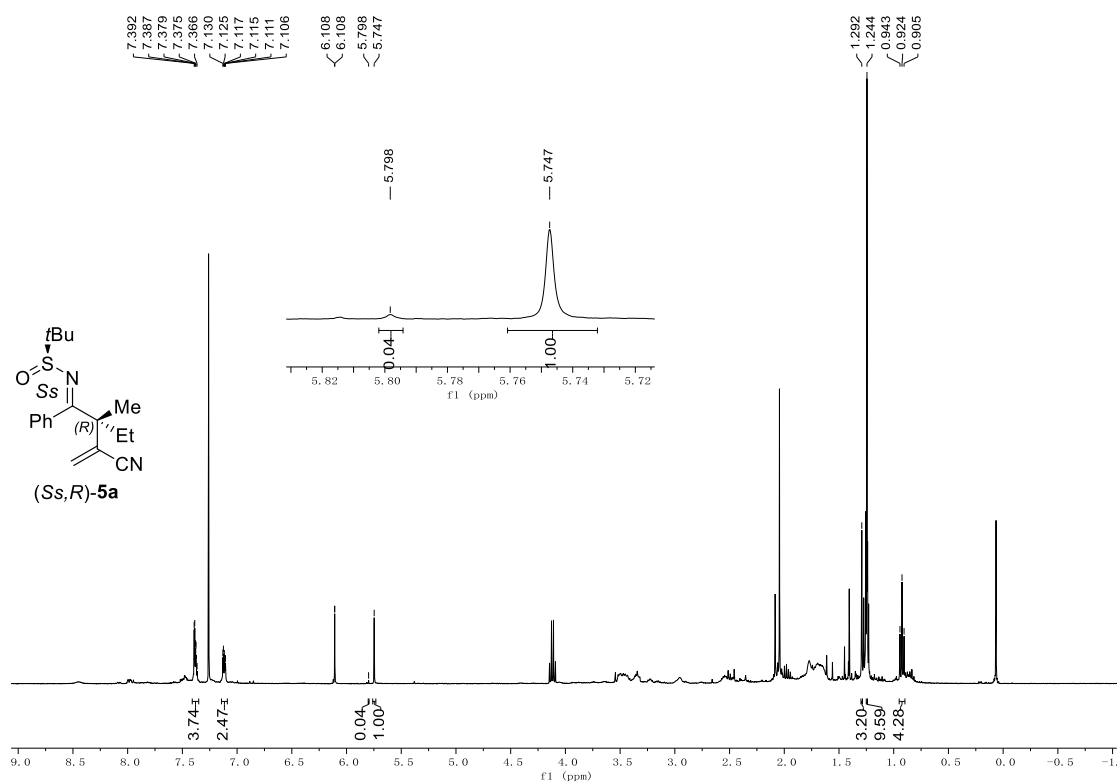

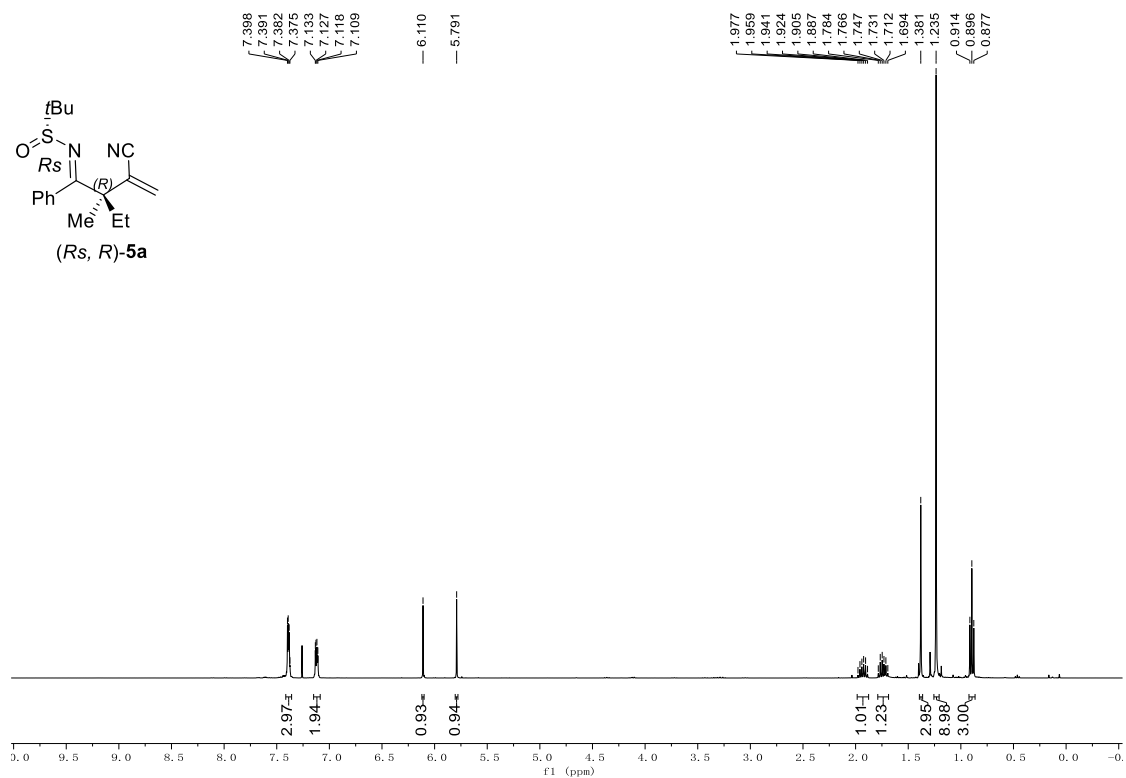

<sup>1</sup>H NMR spectrum (CDCl<sub>3</sub>, 400 MHz) of the diastereomer (*R*, *R*)-5a that was used to identify the diagnostic peak(s) of the minor diastereomer

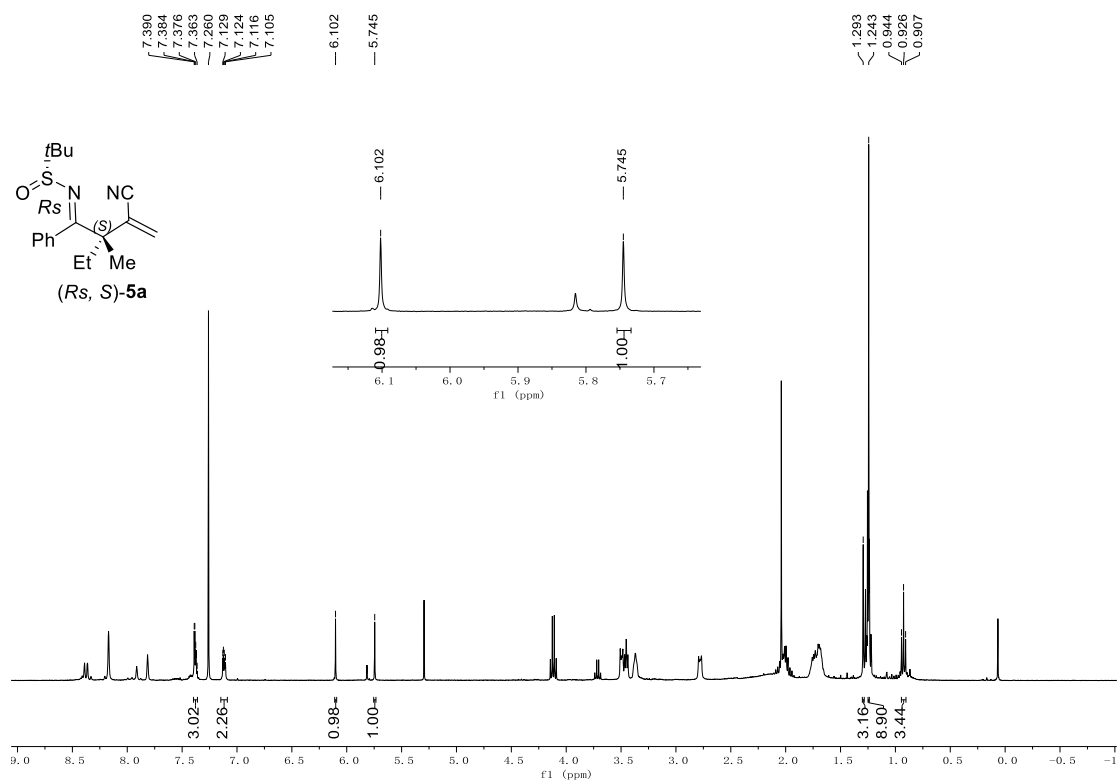

<sup>1</sup>H NMR spectrum (CDCl<sub>3</sub>, 400 MHz) of the crude reaction mixture of (*R*, *S*)-5a (dr > 20:1)  
(No observable presence of the minor diastereomer)

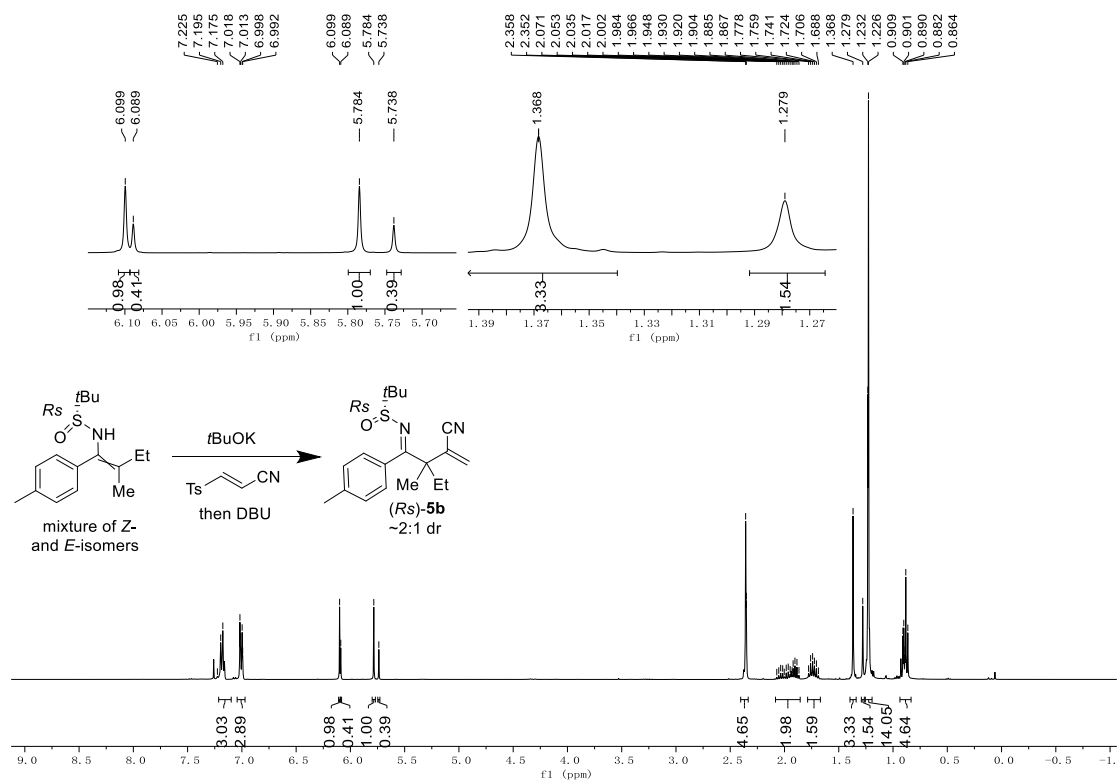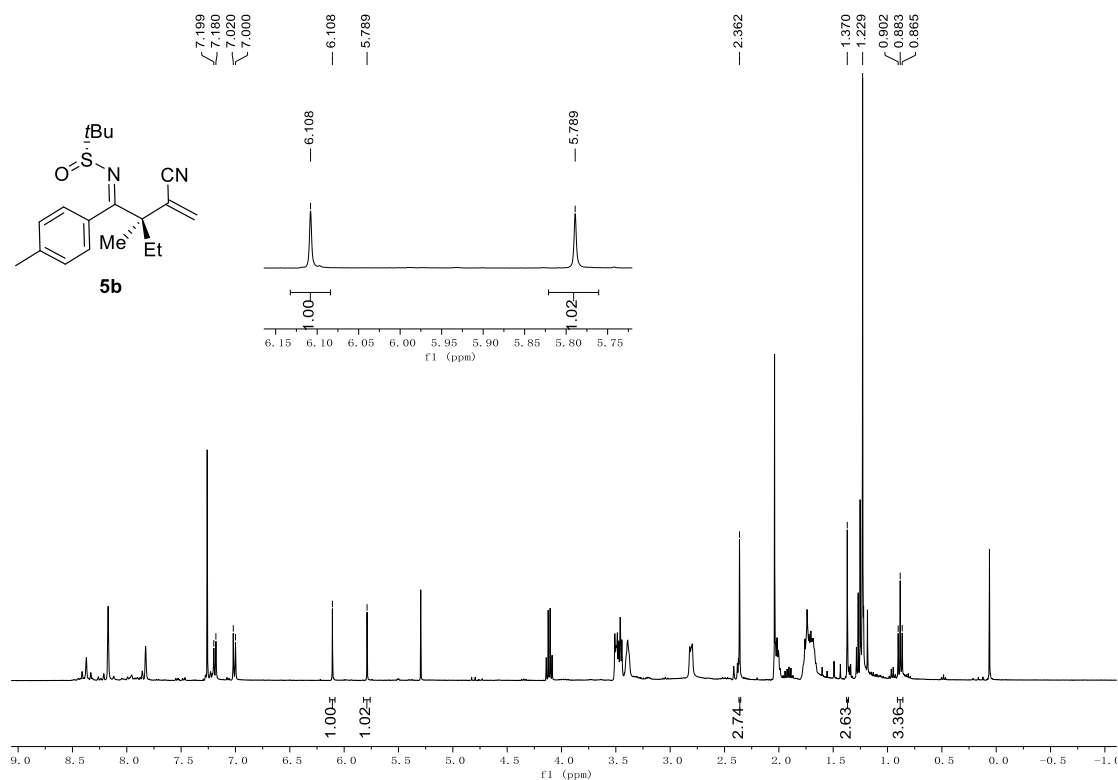

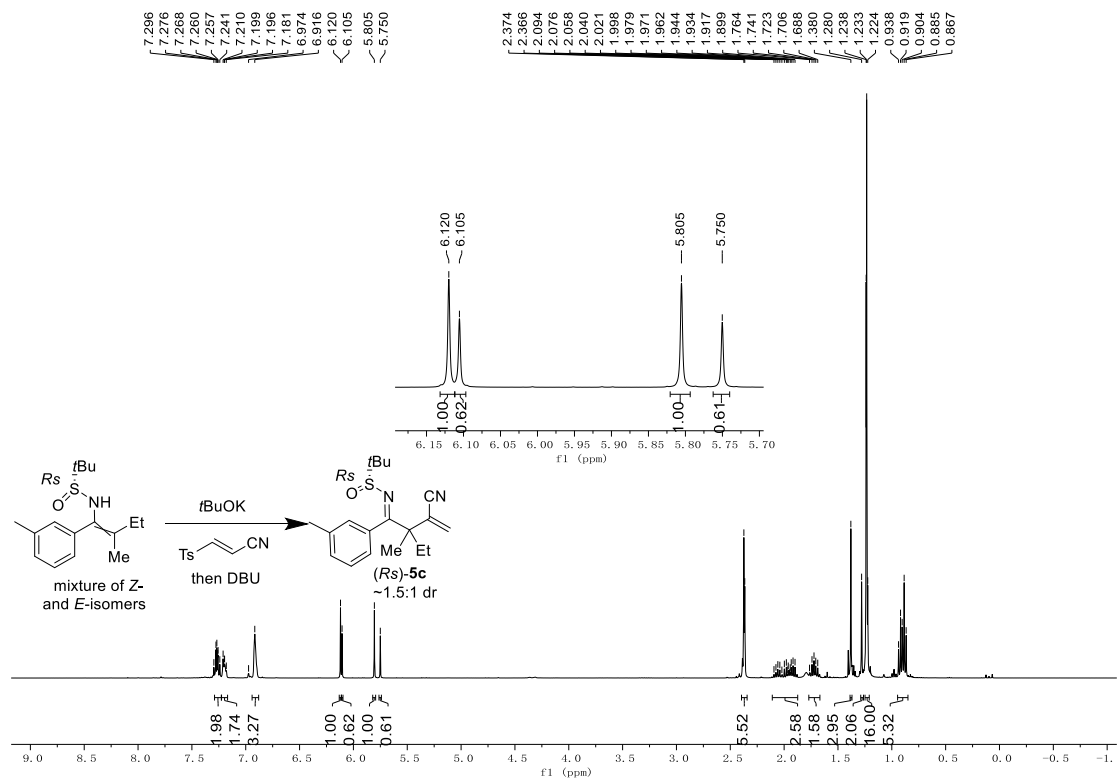

<sup>1</sup>H NMR spectrum (CDCl<sub>3</sub>, 400 MHz) of *(R<sub>s</sub>)-5c* with low diastereoselectivity (dr ~ 1.5:1) intentionally prepared using the corresponding enesulfonamide sample with low *Z/E* ratio

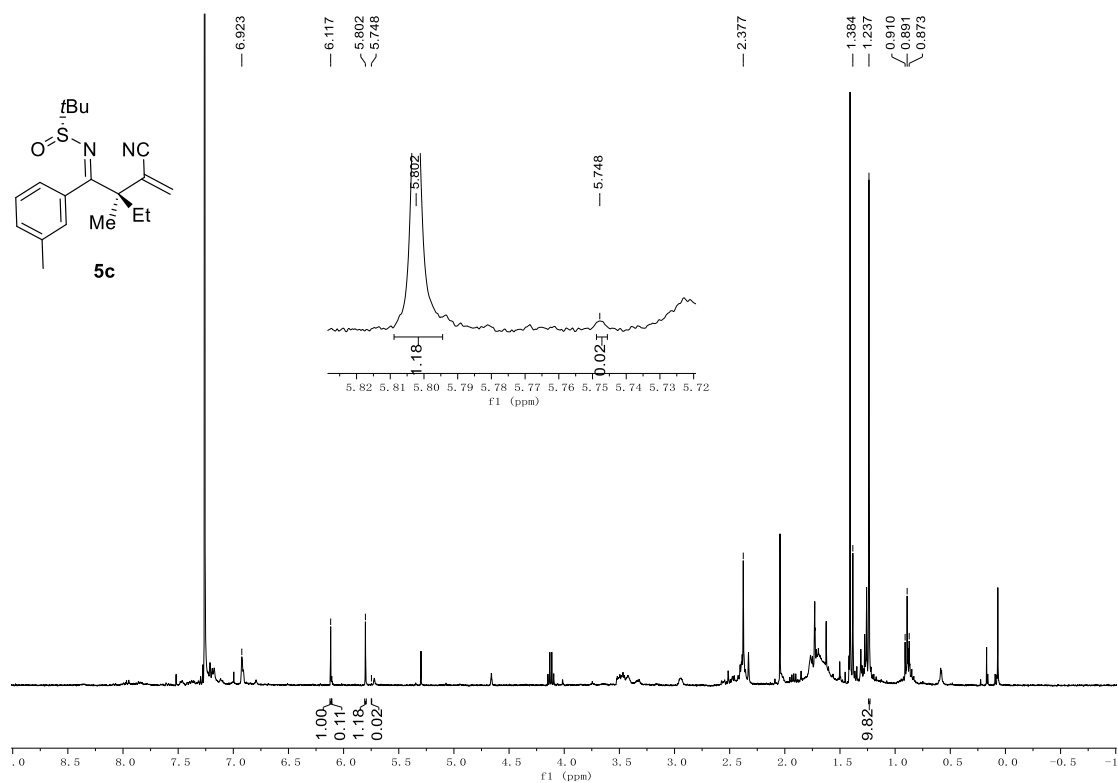

<sup>1</sup>H NMR spectrum (CDCl<sub>3</sub>, 400 MHz) of the crude reaction mixture of **5c** (dr > 20:1)

(*Rs*)-**5d**: HPLC conditions: Daicel Chiralcel IG-3 column, *n*-hexane/2-propanol = 90:10 (v/v), 1.0 mL/min, 254 nm, 40 °C.

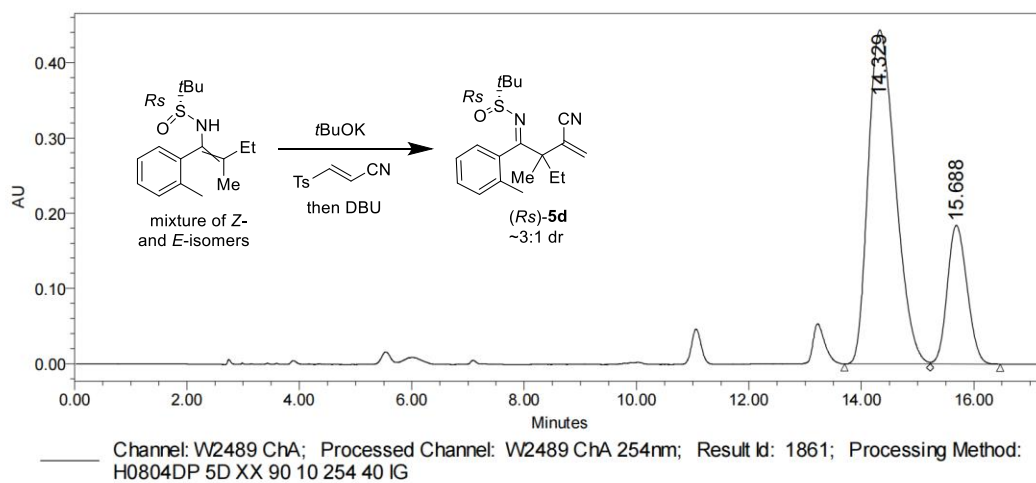

**Processed Channel Descr.: W2489 ChA 254nm**

|   | Processed Channel Descr. | RT     | Area     | % Area | Height |
|---|--------------------------|--------|----------|--------|--------|
| 1 | W2489 ChA 254nm          | 14.329 | 14924120 | 76.82  | 443408 |
| 2 | W2489 ChA 254nm          | 15.688 | 4503073  | 23.18  | 184372 |

HPLC chromatogram for dr determination of crude **5d**

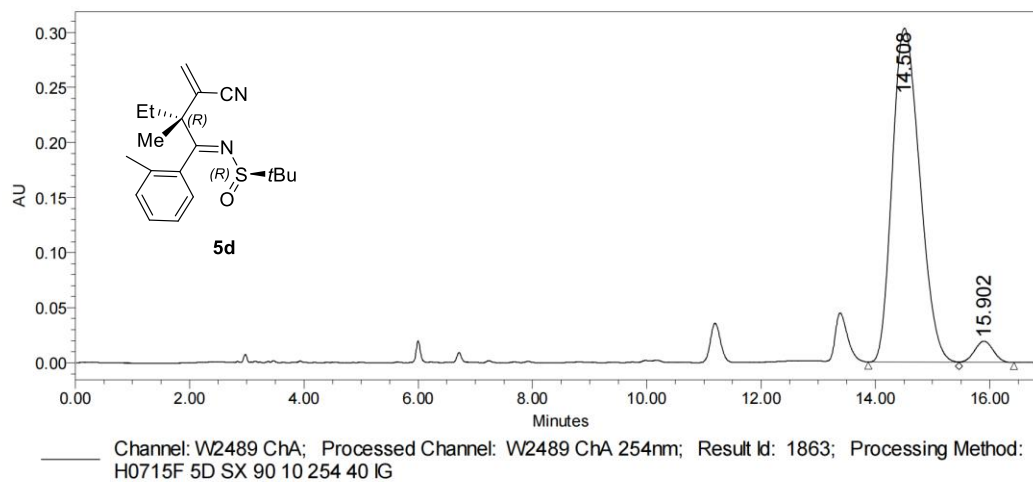

**Processed Channel Descr.: W2489 ChA 254nm**

|   | Processed Channel Descr. | RT     | Area     | % Area | Height |
|---|--------------------------|--------|----------|--------|--------|
| 1 | W2489 ChA 254nm          | 14.508 | 10138355 | 95.82  | 303077 |
| 2 | W2489 ChA 254nm          | 15.902 | 441889   | 4.18   | 19360  |

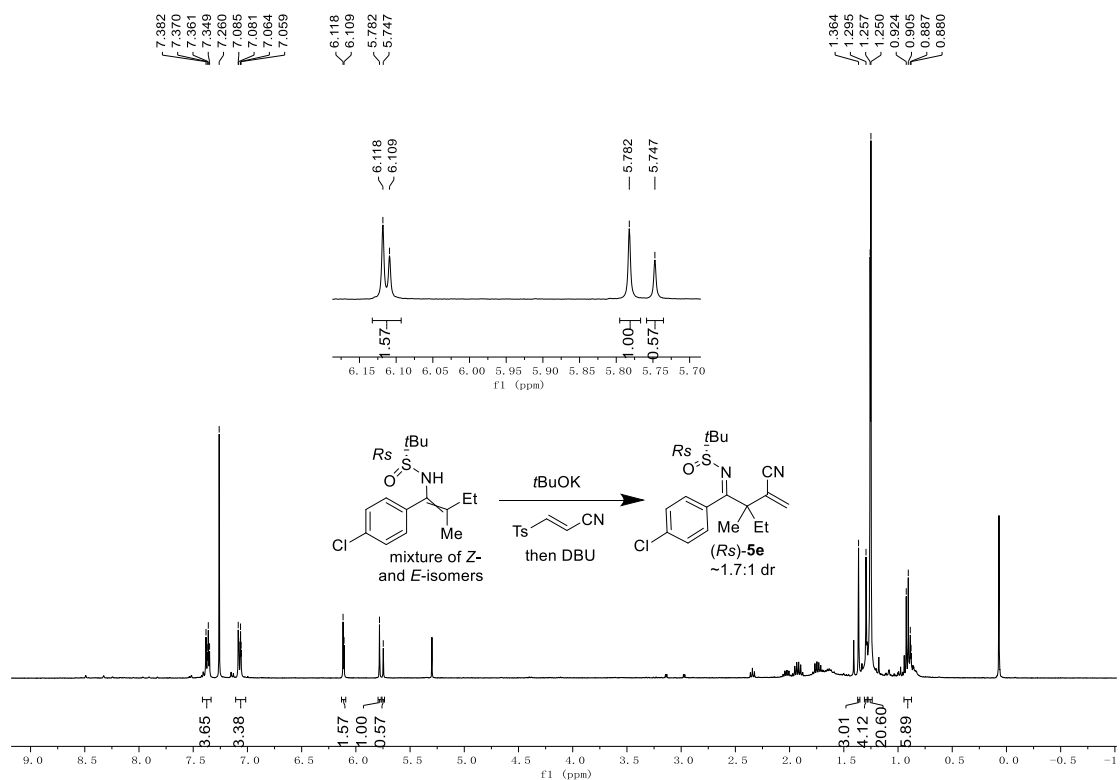

$^1\text{H}$  NMR spectrum ( $\text{CDCl}_3$ , 400 MHz) of *(R\_s)*-**5e** with low diastereoselectivity (dr ~ 2:1) intentionally prepared using the corresponding enesulfenamide sample with low *Z/E* ratio

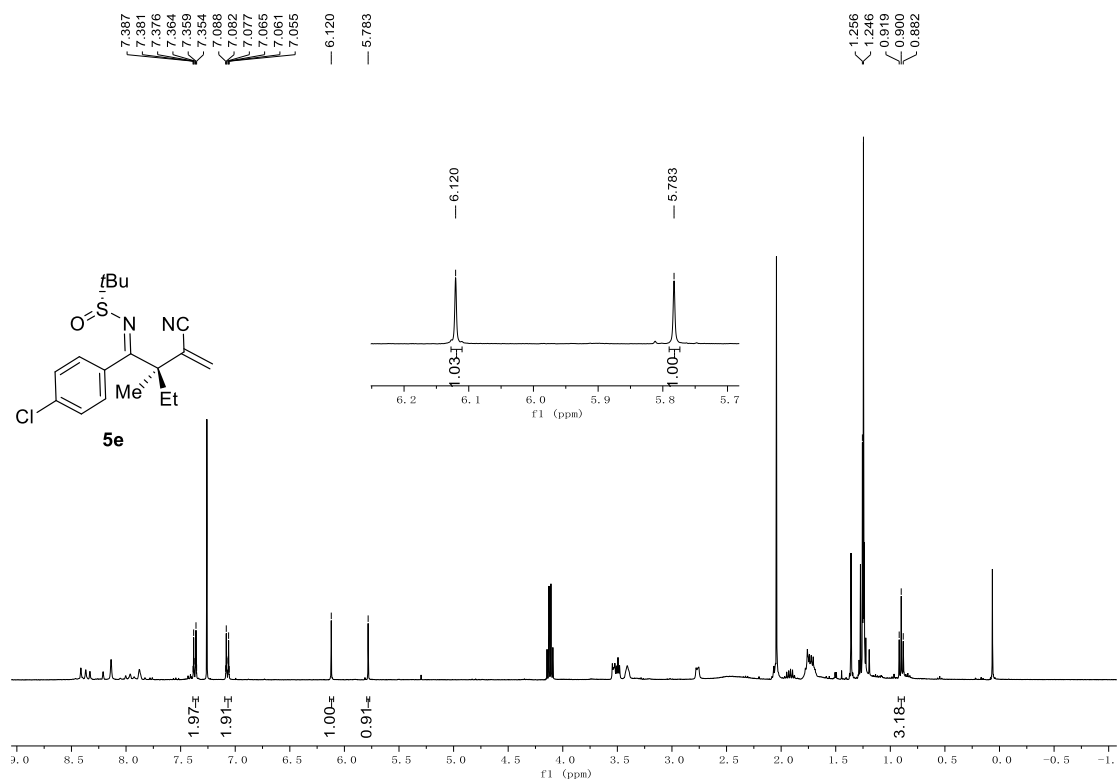

$^1\text{H}$  NMR spectrum ( $\text{CDCl}_3$ , 400 MHz) of the crude reaction mixture of **5e** (dr > 20:1) (No observable presence of the minor diastereomer)

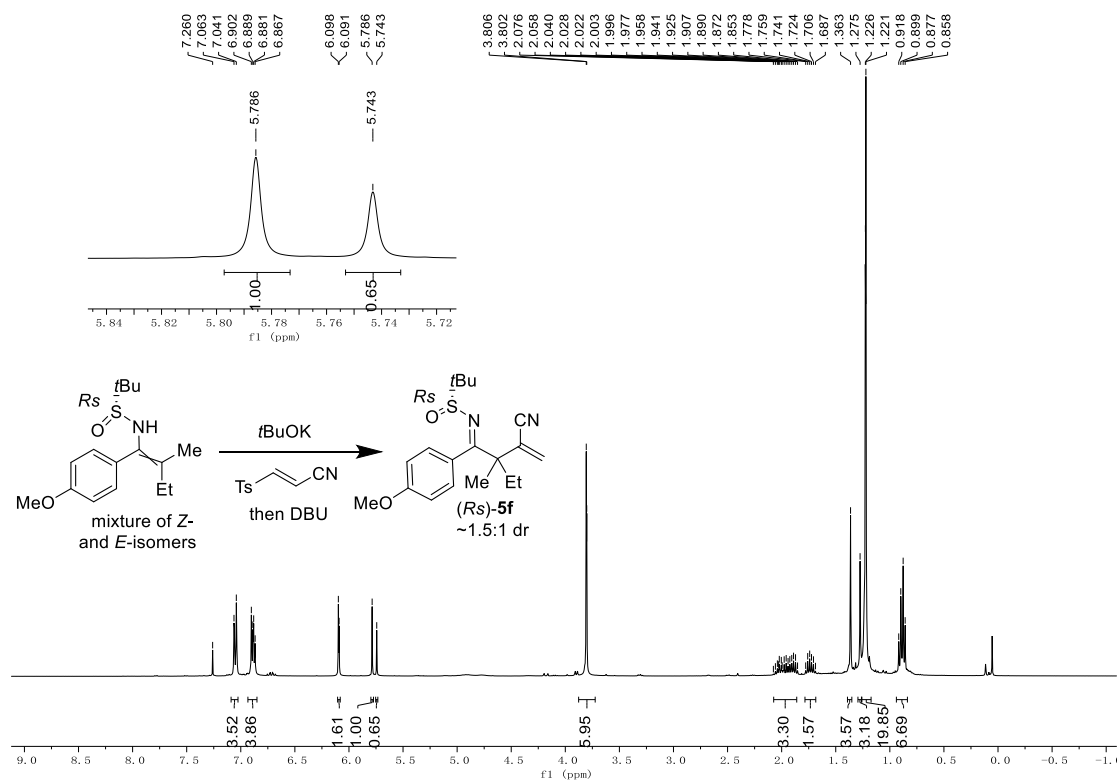

<sup>1</sup>H NMR spectrum (CDCl<sub>3</sub>, 400 MHz) of *(R<sub>s</sub>)-5f* with low diastereoselectivity (dr ~ 1.5:1) intentionally prepared using the corresponding enesulfenamide sample with low *Z/E* ratio

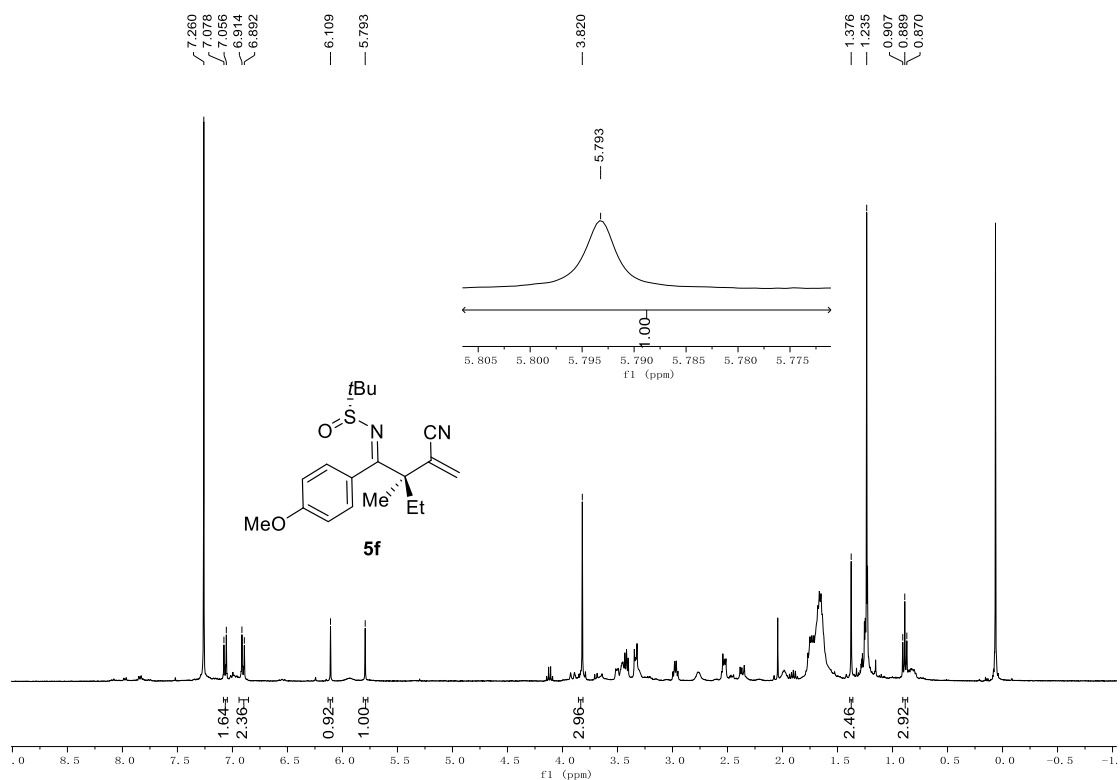

<sup>1</sup>H NMR spectrum (CDCl<sub>3</sub>, 400 MHz) of the crude reaction mixture of *5f* (dr > 20:1) (No observable presence of the minor diastereomer)

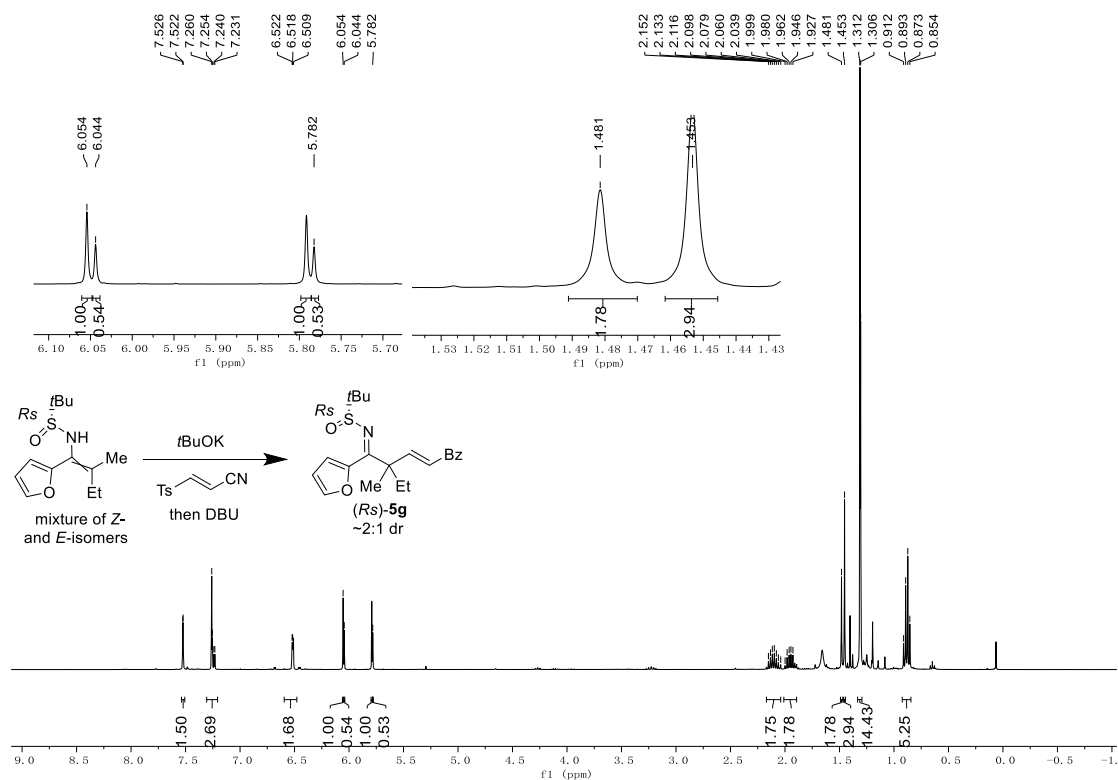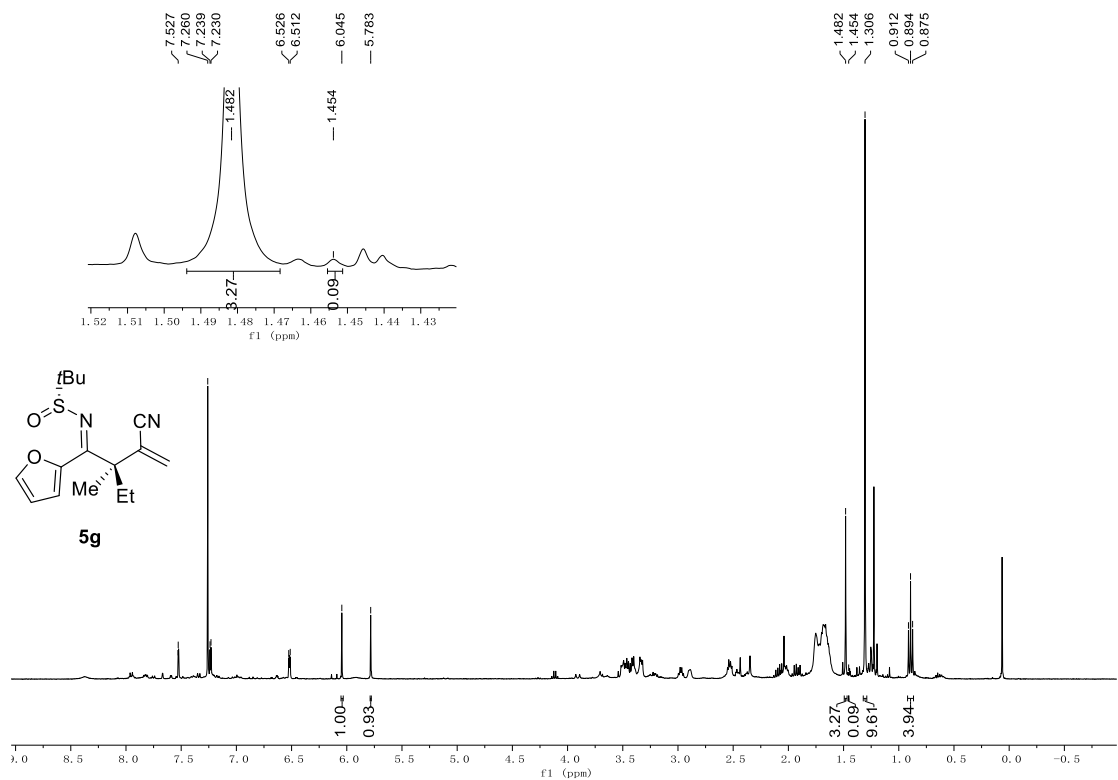



(*R*s)-**5h**: HPLC conditions: Daicel Chiralcel IC-3 column, *n*-hexane/2-propanol = 90:10 (v/v), 1.0 mL/min, 254 nm, 40 °C.

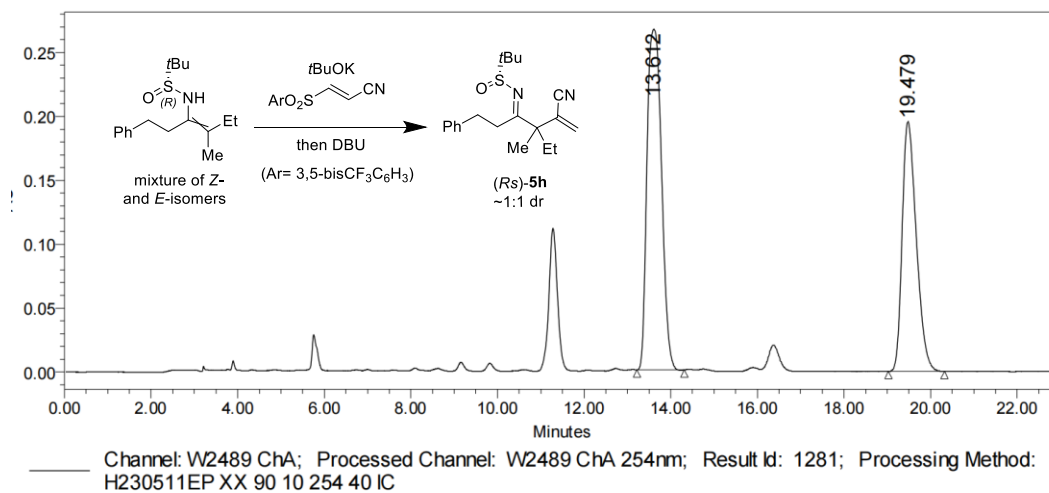

**Processed Channel Descr.: W2489 ChA 254nm**

|   | Processed Channel Descr. | RT     | Area    | % Area | Height |
|---|--------------------------|--------|---------|--------|--------|
| 1 | W2489 ChA 254nm          | 13.612 | 6192435 | 58.32  | 266555 |
| 2 | W2489 ChA 254nm          | 19.479 | 4425000 | 41.68  | 195473 |

HPLC chromatogram for dr determination of crude **5h**

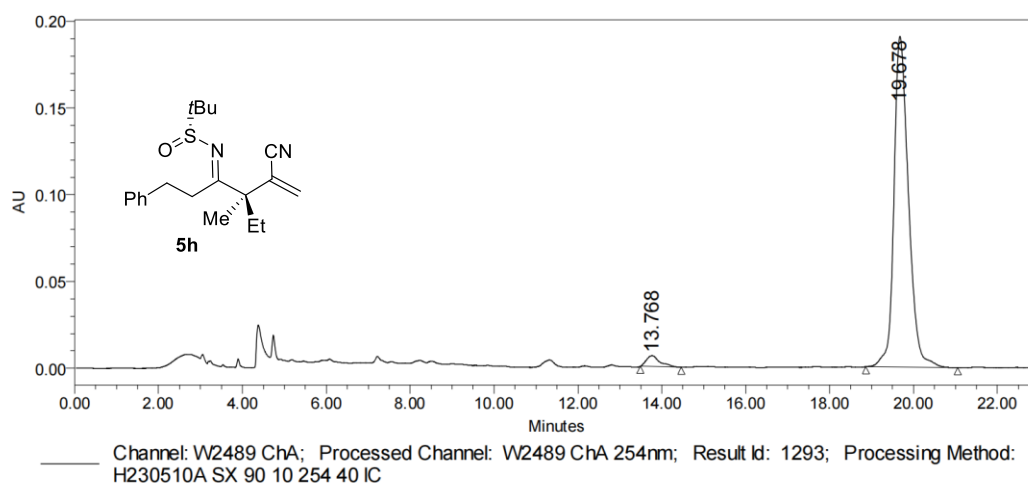

**Processed Channel Descr.: W2489 ChA 254nm**

|   | Processed Channel Descr. | RT     | Area    | % Area | Height |
|---|--------------------------|--------|---------|--------|--------|
| 1 | W2489 ChA 254nm          | 13.768 | 139726  | 2.97   | 6328   |
| 2 | W2489 ChA 254nm          | 19.678 | 4570911 | 97.03  | 190528 |

(*R*s)-**5i**: HPLC conditions: Daicel Chiralcel ID-3 column, *n*-hexane/2-propanol = 87:13 (v/v), 1.0 mL/min, 254 nm, 40 °C.

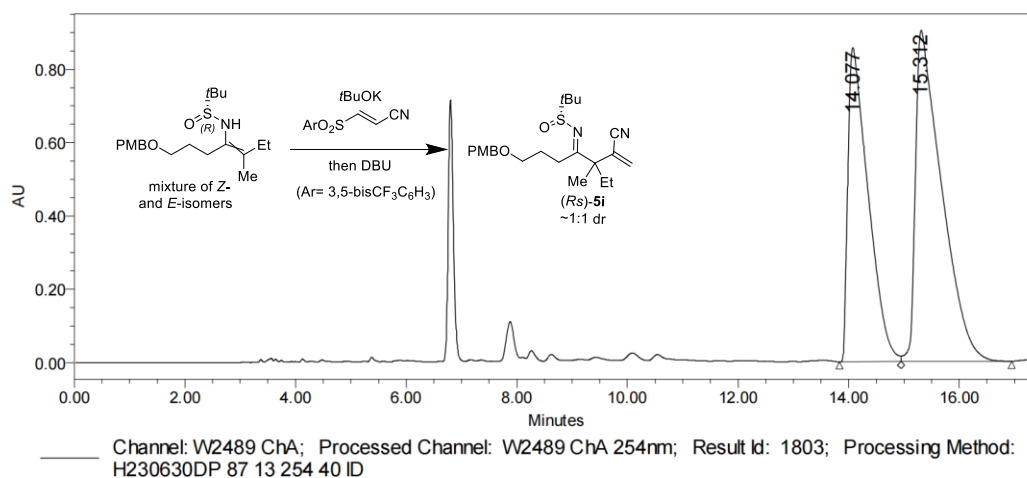

**Processed Channel Descr.: W2489 ChA 254nm**

|   | Processed Channel Descr. | RT     | Area     | % Area | Height |
|---|--------------------------|--------|----------|--------|--------|
| 1 | W2489 ChA 254nm          | 14.077 | 21795480 | 42.41  | 856224 |
| 2 | W2489 ChA 254nm          | 15.312 | 29602331 | 57.59  | 902896 |

HPLC chromatogram for dr determination of crude **5i**

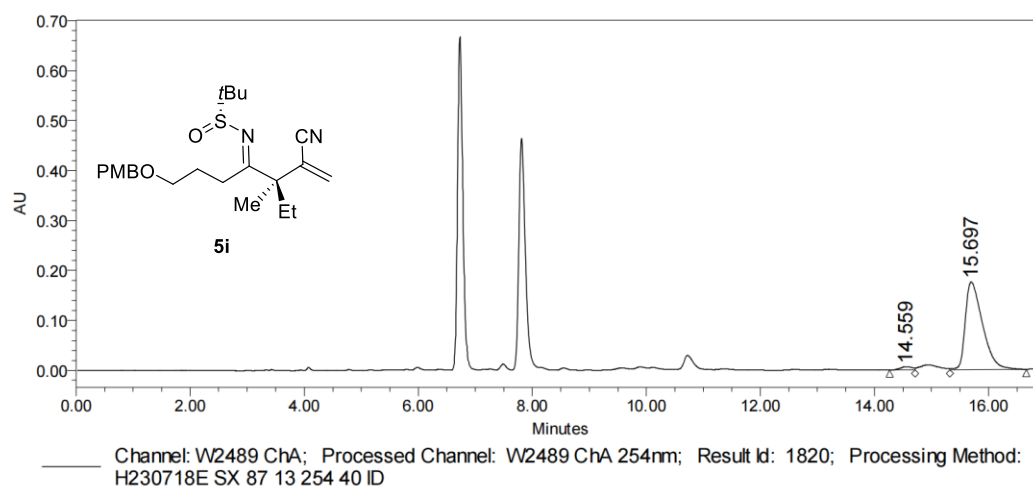

**Processed Channel Descr.: W2489 ChA 254nm**

|   | Processed Channel Descr. | RT     | Area    | % Area | Height |
|---|--------------------------|--------|---------|--------|--------|
| 1 | W2489 ChA 254nm          | 14.559 | 91885   | 2.45   | 6258   |
| 2 | W2489 ChA 254nm          | 15.697 | 3662140 | 97.55  | 175507 |

(*R*<sub>s</sub>)-**5j**: HPLC conditions: Daicel Chiralcel IF-3 column, *n*-hexane/2-propanol = 98:02 (v/v), 1.0 mL/min, 254 nm, 40 °C.

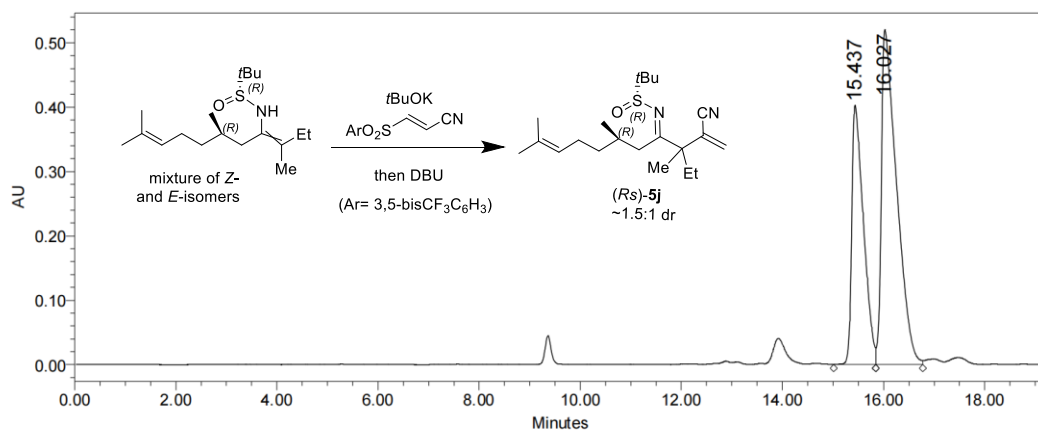

**Processed Channel Descr.: W2489 ChA 254nm**

|   | Processed Channel Descr. | RT     | Area     | % Area | Height |
|---|--------------------------|--------|----------|--------|--------|
| 1 | W2489 ChA 254nm          | 15.437 | 6465505  | 37.28  | 402728 |
| 2 | W2489 ChA 254nm          | 16.027 | 10879156 | 62.72  | 519789 |

HPLC chromatogram for dr determination of crude **5j**

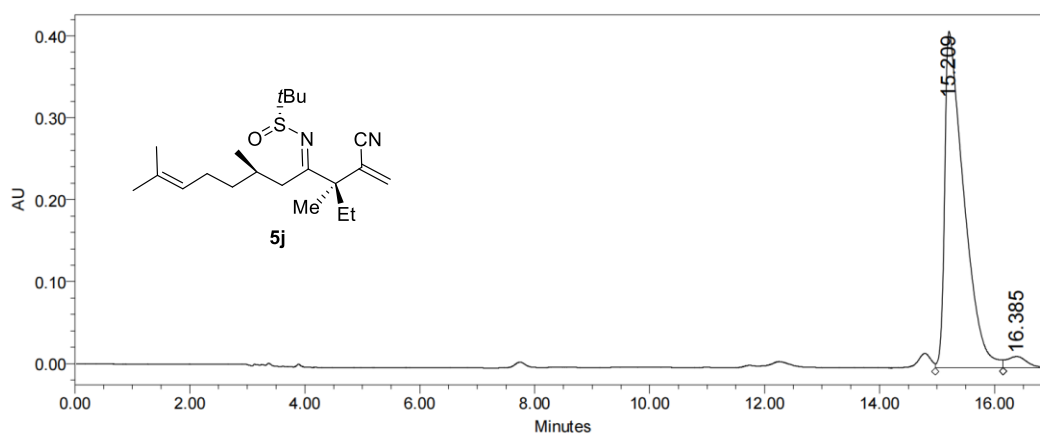

**Processed Channel Descr.: W2489 ChA 254nm**

|   | Processed Channel Descr. | RT     | Area    | % Area | Height |
|---|--------------------------|--------|---------|--------|--------|
| 1 | W2489 ChA 254nm          | 15.209 | 9461237 | 96.64  | 410186 |
| 2 | W2489 ChA 254nm          | 16.385 | 329344  | 3.36   | 13585  |

(*R*s)-**5k**: HPLC conditions: Daicel Chiralcel ID-3 column, *n*-hexane/2-propanol = 95:05 (v/v), 1.0 mL/min, 254 nm, 40 °C.

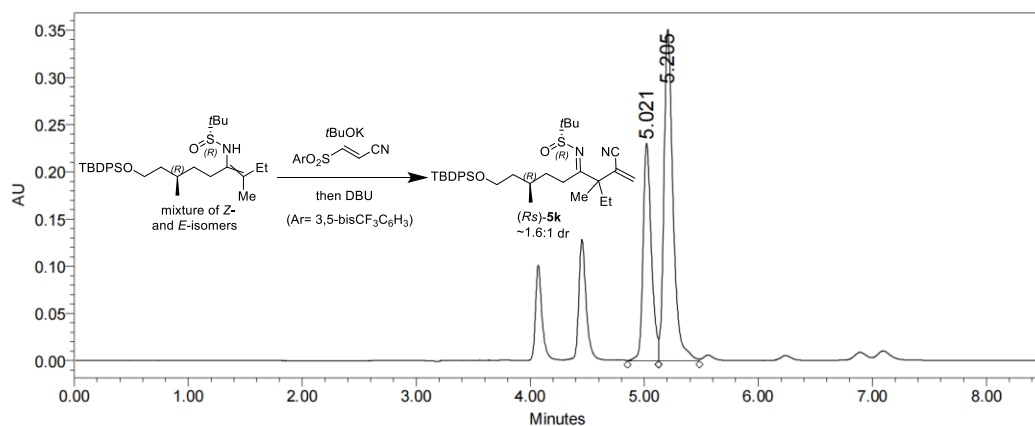

Channel: W2489 ChA; Processed Channel: W2489 ChA 254nm; Result Id: 1343; Processing Method: H230516DP XX 95 05 254 40 ID

**Processed Channel Descr.: W2489 ChA 254nm**

|   | Processed Channel Descr. | RT    | Area    | % Area | Height |
|---|--------------------------|-------|---------|--------|--------|
| 1 | W2489 ChA 254nm          | 5.021 | 1160745 | 37.30  | 230475 |
| 2 | W2489 ChA 254nm          | 5.205 | 1950781 | 62.70  | 350999 |

HPLC chromatogram for dr determination of crude **5k**

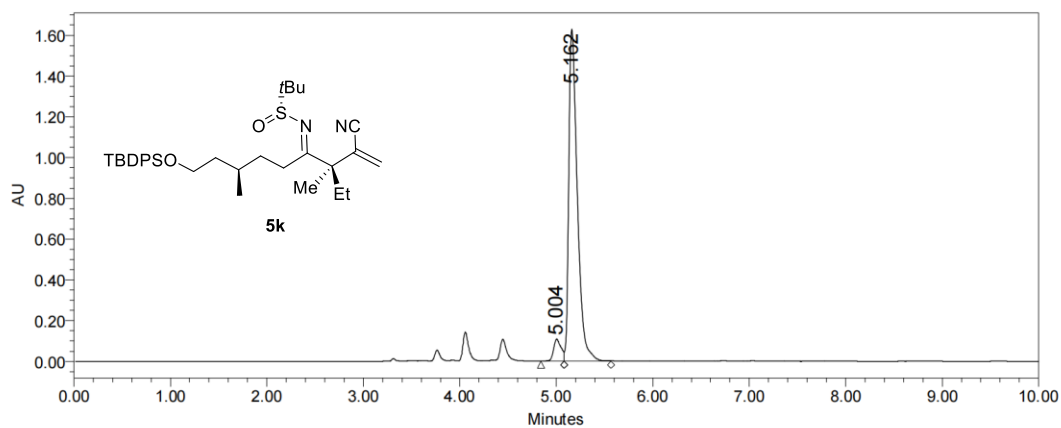

Channel: W2489 ChA; Processed Channel: W2489 ChA 254nm; Result Id: 1488; Processing Method: H0515C SX 90 10 254 40 ID

**Processed Channel Descr.: W2489 ChA 254nm**

|   | Processed Channel Descr. | RT    | Area    | % Area | Height  |
|---|--------------------------|-------|---------|--------|---------|
| 1 | W2489 ChA 254nm          | 5.004 | 592618  | 5.60   | 108175  |
| 2 | W2489 ChA 254nm          | 5.162 | 9994755 | 94.40  | 1627822 |

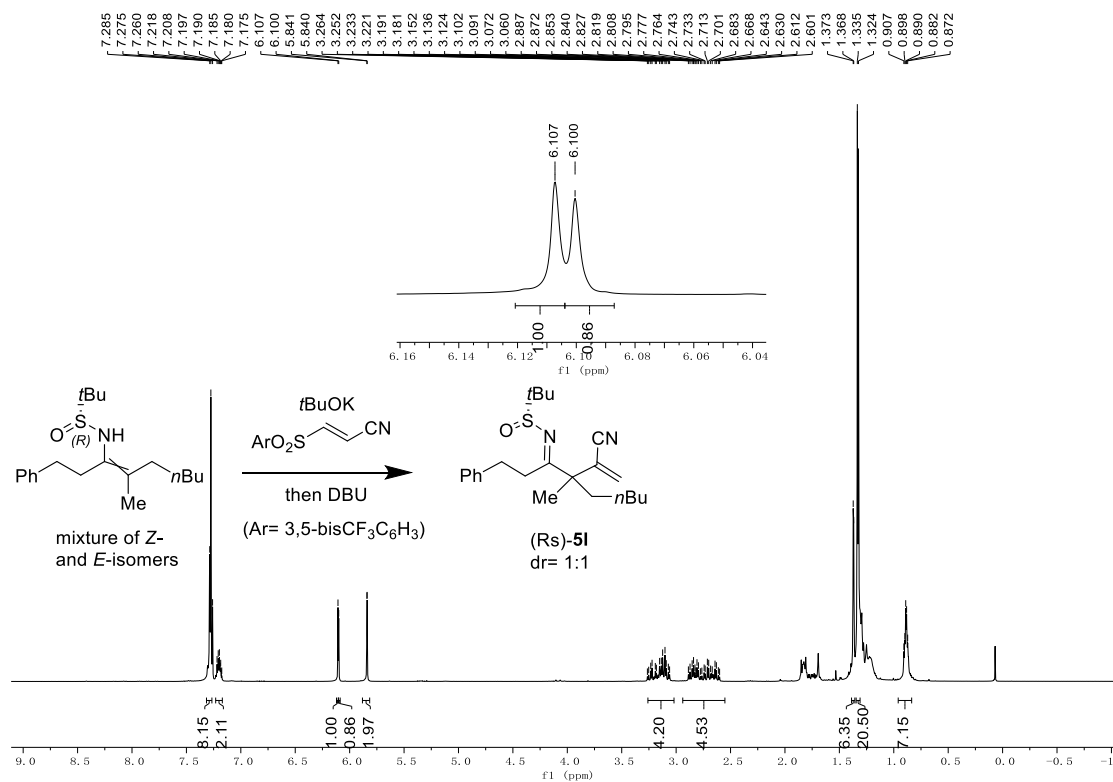

<sup>1</sup>H NMR spectrum (CDCl<sub>3</sub>, 400 MHz) of (*R*s)-**5I** with low diastereoselectivity (dr ~ 1:1) intentionally prepared using the corresponding enesulfonamide sample with low *Z/E* ratio

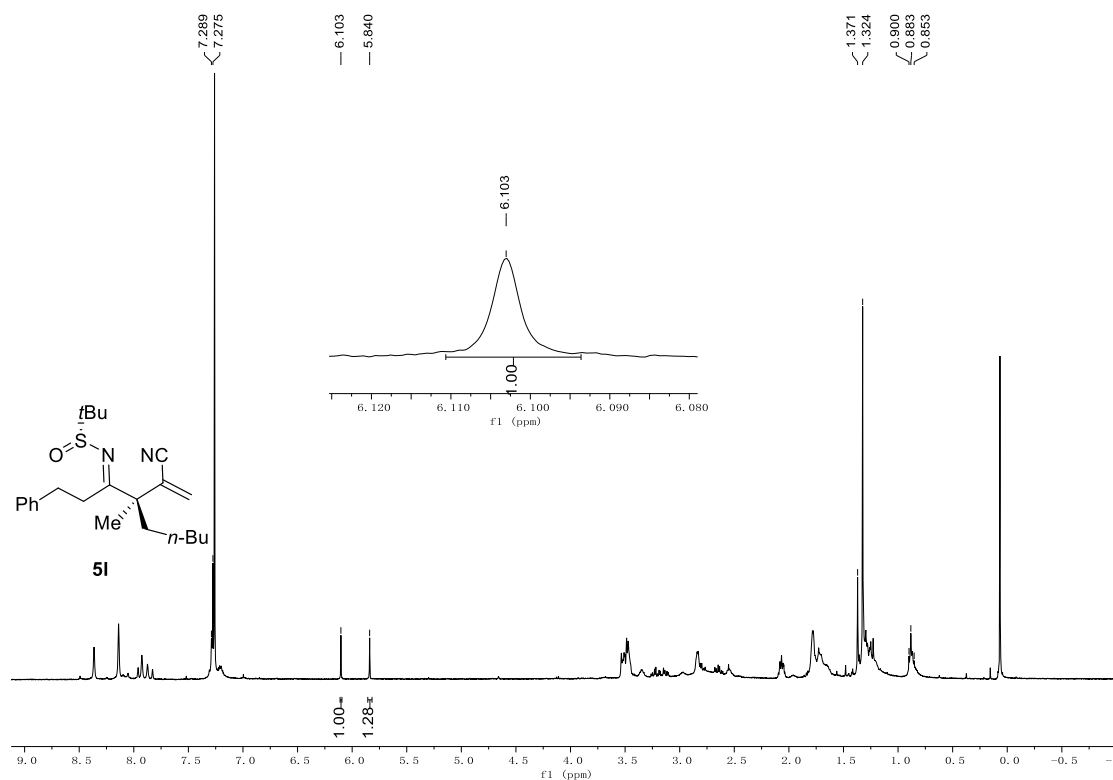

<sup>1</sup>H NMR spectrum (CDCl<sub>3</sub>, 400 MHz) of the crude reaction mixture of **5I** (dr > 20:1) (No observable presence of the minor diastereomer)

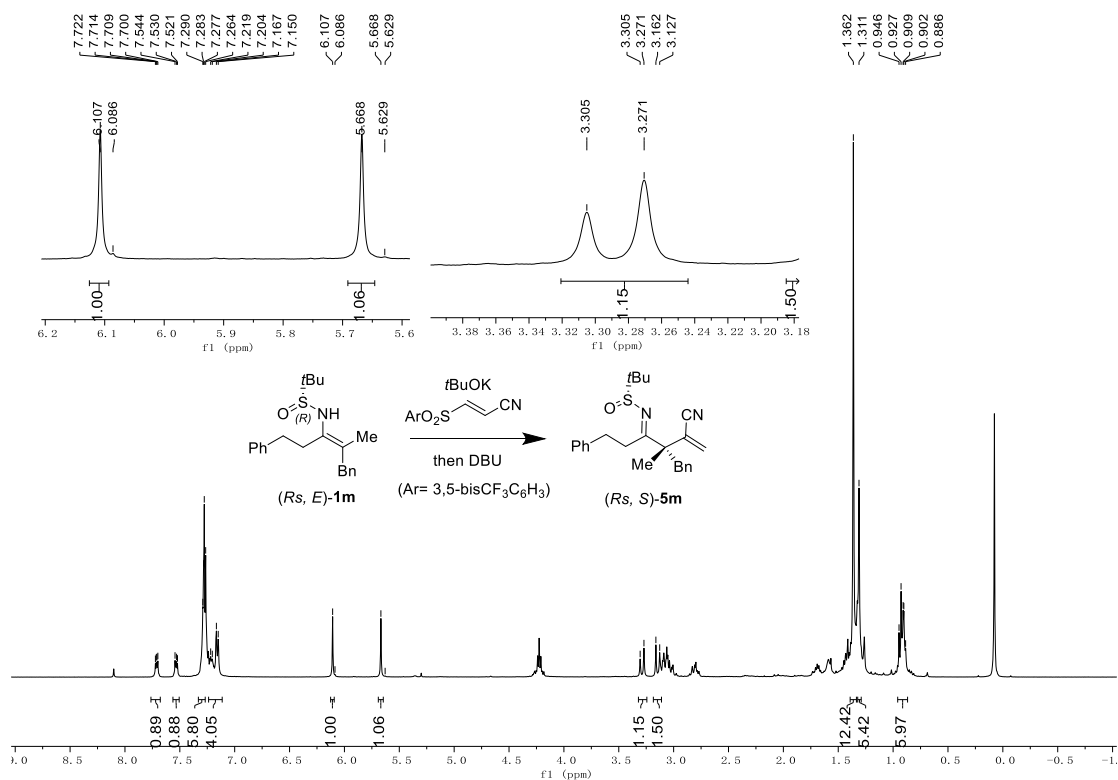

<sup>1</sup>H NMR spectrum (CDCl<sub>3</sub>, 400 MHz) of the diastereomer (*R<sub>s</sub>, S*)-**5m** that was intentionally prepared by using geometric isomer (*R<sub>s</sub>, E*)-**1m** and was used to identify the diagnostic peak(s) of the minor diastereomer

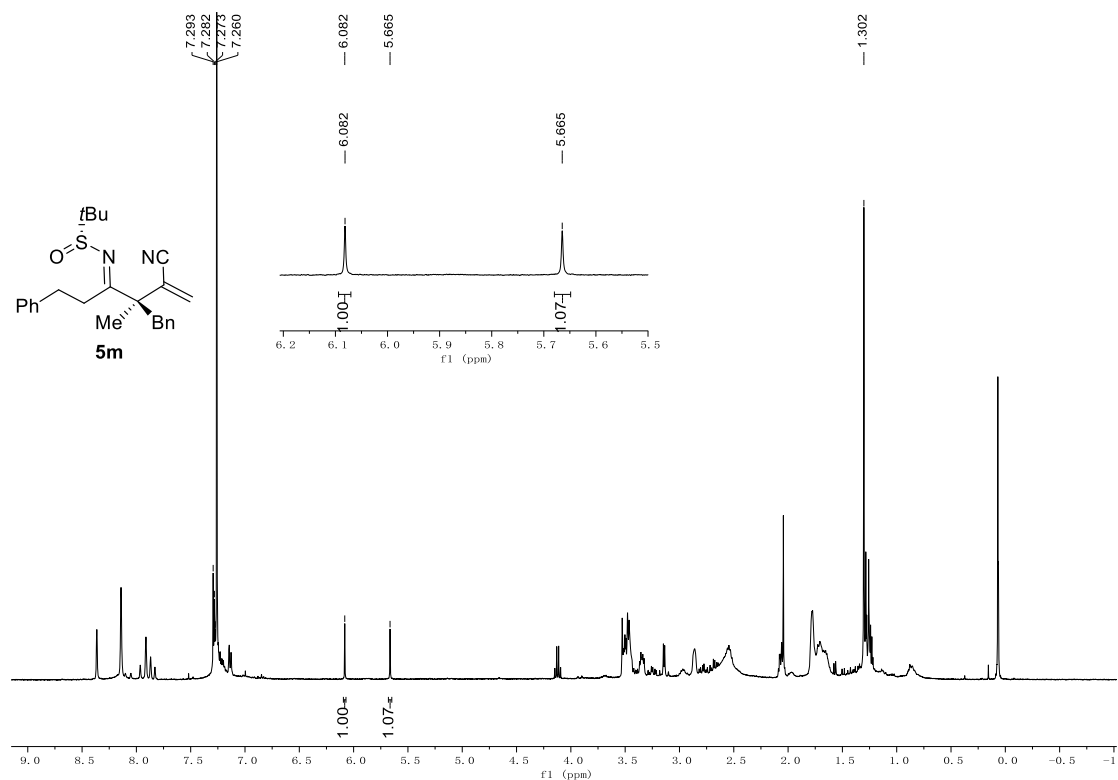

<sup>1</sup>H NMR spectrum (CDCl<sub>3</sub>, 400 MHz) of the crude reaction mixture of **5m** (dr > 20:1)  
(No observable presence of the minor diastereomer)

(*R*s)-**5n**: HPLC conditions: Daicel Chiralcel IC-3 column, *n*-hexane/2-propanol = 90:10 (v/v), 1.0 mL/min, 254 nm, 40 °C.

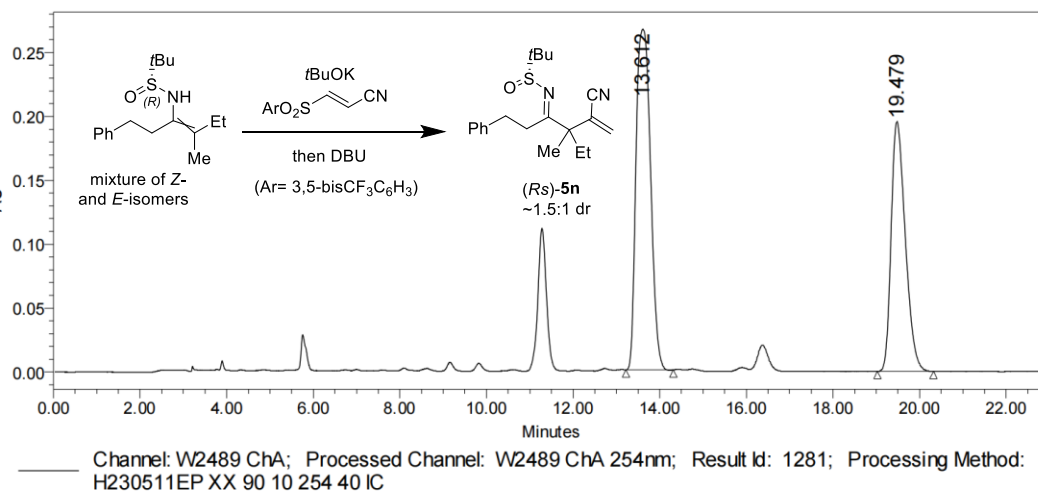

**Processed Channel Descr.: W2489 ChA 254nm**

|   | Processed Channel Descr. | RT     | Area    | % Area | Height |
|---|--------------------------|--------|---------|--------|--------|
| 1 | W2489 ChA 254nm          | 13.612 | 6192435 | 58.32  | 266555 |
| 2 | W2489 ChA 254nm          | 19.479 | 4425000 | 41.68  | 195473 |

HPLC chromatogram for dr determination of crude **5n**

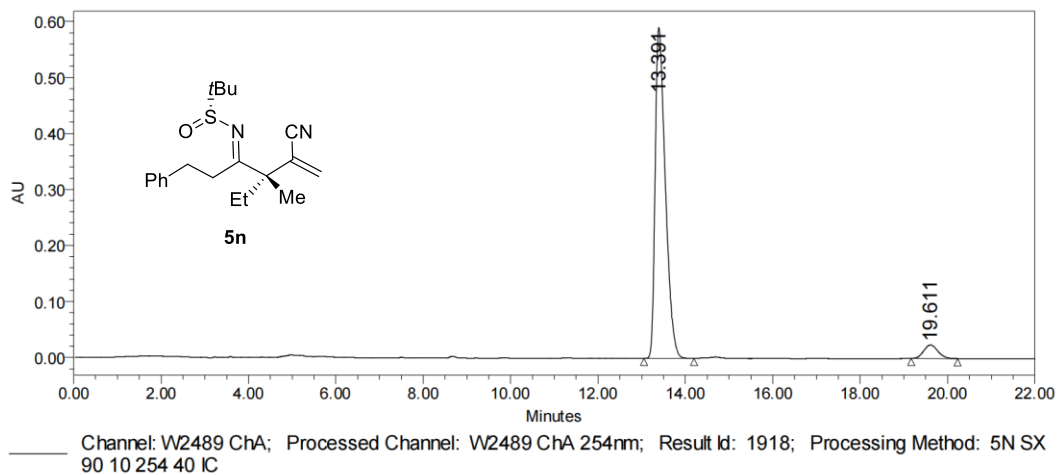

**Processed Channel Descr.: W2489 ChA 254nm**

|   | Processed Channel Descr. | RT     | Area    | % Area | Height |
|---|--------------------------|--------|---------|--------|--------|
| 1 | W2489 ChA 254nm          | 13.391 | 9558275 | 94.60  | 590574 |
| 2 | W2489 ChA 254nm          | 19.611 | 545500  | 5.40   | 24224  |

(*R*<sub>s</sub>)-**5o**: HPLC conditions: Daicel Chiralcel AD-3 column, *n*-hexane/2-propanol = 95:05 (v/v), 1.0 mL/min, 254 nm, 40 °C.

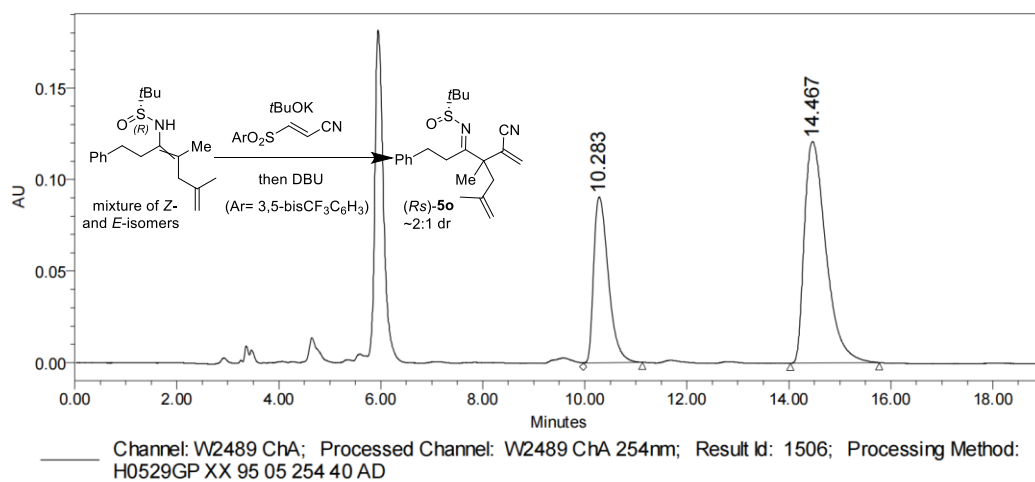

**Processed Channel Descr.: W2489 ChA 254nm**

|   | Processed Channel Descr. | RT     | Area    | % Area | Height |
|---|--------------------------|--------|---------|--------|--------|
| 1 | W2489 ChA 254nm          | 10.283 | 1798889 | 33.55  | 90458  |
| 2 | W2489 ChA 254nm          | 14.467 | 3563376 | 66.45  | 120912 |

HPLC chromatogram for dr determination of crude **5o**

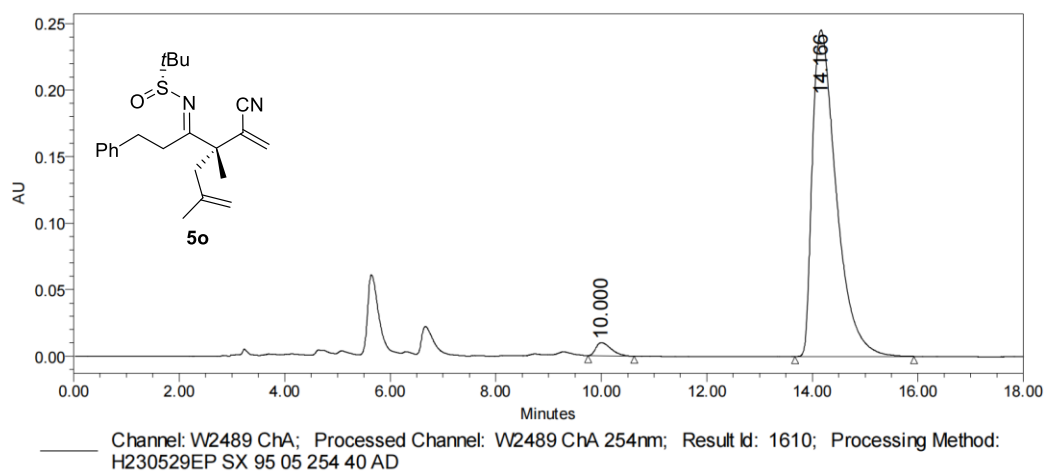

**Processed Channel Descr.: W2489 ChA 254nm**

|   | Processed Channel Descr. | RT     | Area    | % Area | Height |
|---|--------------------------|--------|---------|--------|--------|
| 1 | W2489 ChA 254nm          | 10.000 | 199039  | 2.51   | 9912   |
| 2 | W2489 ChA 254nm          | 14.166 | 7728592 | 97.49  | 245373 |



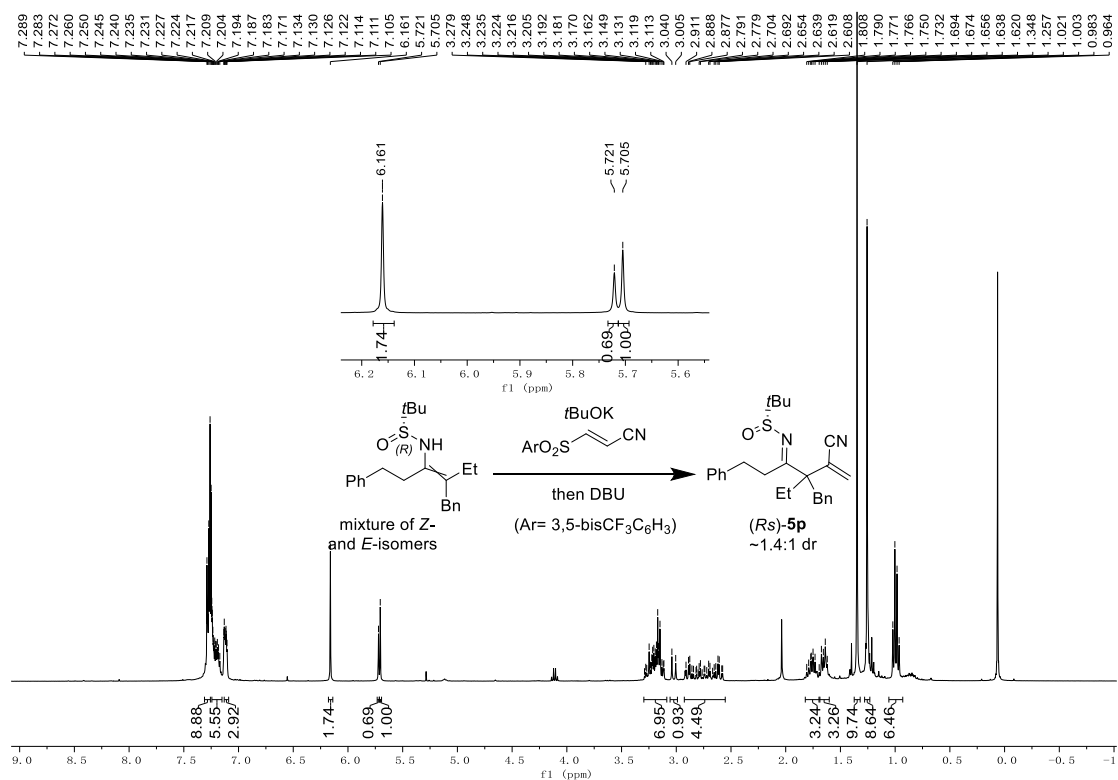

<sup>1</sup>H NMR spectrum (CDCl<sub>3</sub>, 400 MHz) of (R<sub>s</sub>)-5p with low diastereoselectivity (dr ~ 1.4:1) intentionally prepared using the corresponding enesulfonamide sample with low Z/E ratio

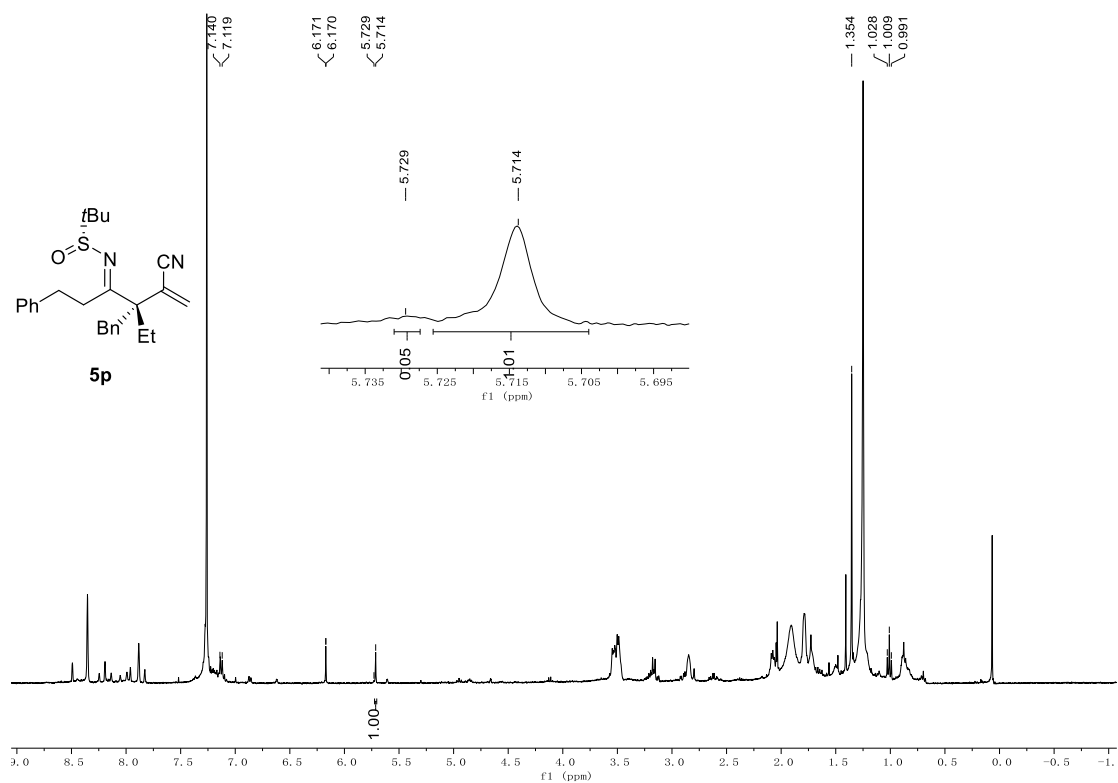

<sup>1</sup>H NMR spectrum (CDCl<sub>3</sub>, 400 MHz) of the crude reaction mixture of 5p (dr = 20:1)

(*Rs*)-**5q**: HPLC conditions: Daicel Chiralcel AD-3 column, *n*-hexane/2-propanol = 90:10 (v/v), 1.0 mL/min, 254 nm, 40 °C.

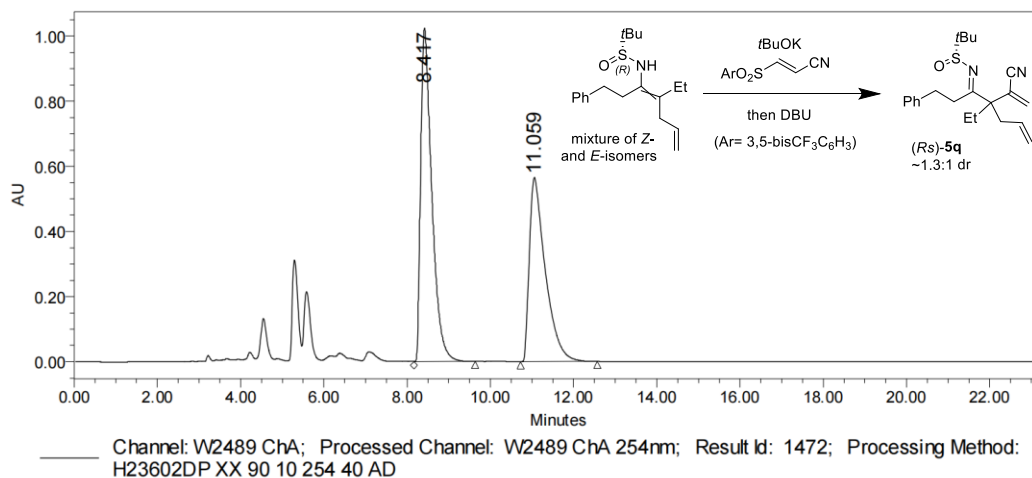

**Processed Channel Descr.: W2489 ChA 254nm**

|   | Processed Channel Descr. | RT     | Area     | % Area | Height  |
|---|--------------------------|--------|----------|--------|---------|
| 1 | W2489 ChA 254nm          | 8.417  | 19192606 | 56.14  | 1022940 |
| 2 | W2489 ChA 254nm          | 11.059 | 14997089 | 43.86  | 564974  |

HPLC chromatogram for dr determination of crude **5q**

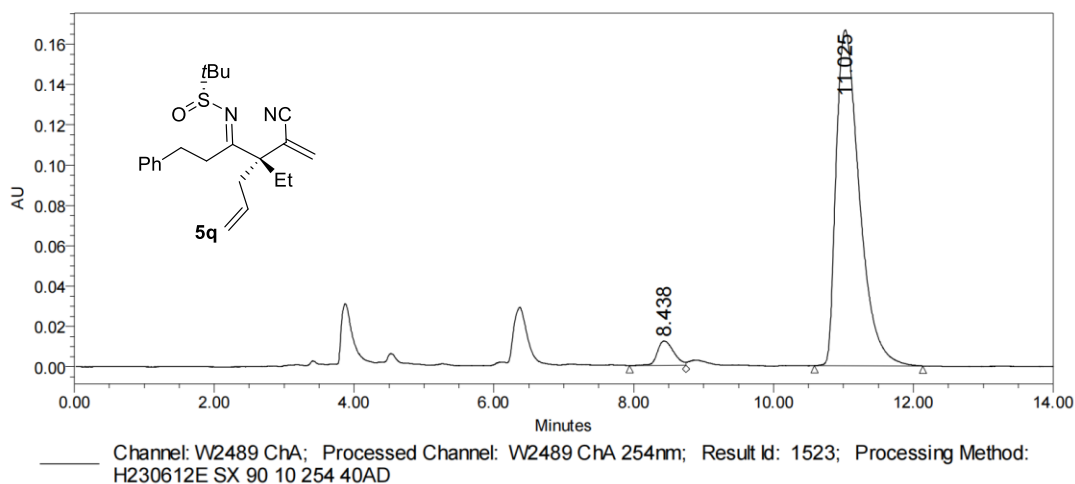

**Processed Channel Descr.: W2489 ChA 254nm**

|   | Processed Channel Descr. | RT     | Area    | % Area | Height |
|---|--------------------------|--------|---------|--------|--------|
| 1 | W2489 ChA 254nm          | 8.438  | 196470  | 4.86   | 12085  |
| 2 | W2489 ChA 254nm          | 11.025 | 3849597 | 95.14  | 166444 |

(*R*<sub>s</sub>)-**5r**: HPLC conditions: Daicel Chiralcel ID-3 column, *n*-hexane/2-propanol = 90:10 (v/v), 1.0 mL/min, 254 nm, 40 °C.

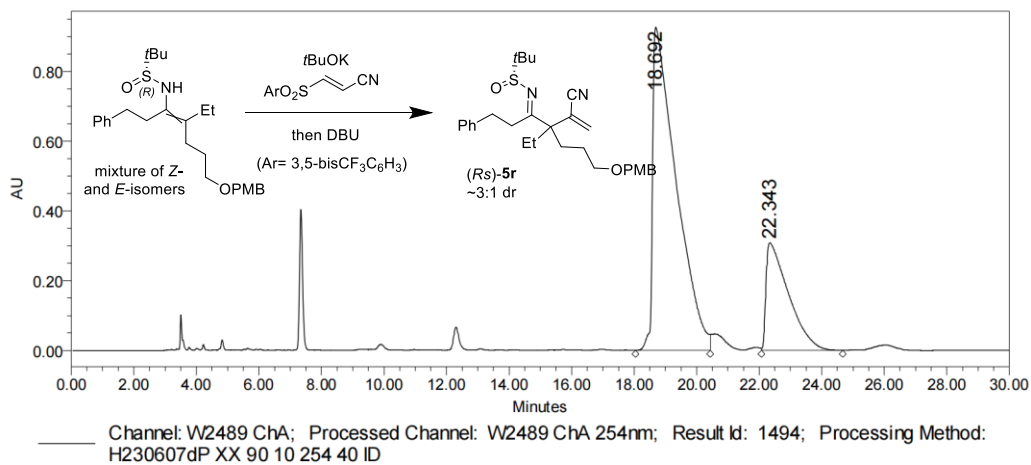

**Processed Channel Descr.: W2489 ChA 254nm**

|   | Processed Channel Descr. | RT     | Area     | % Area | Height |
|---|--------------------------|--------|----------|--------|--------|
| 1 | W2489 ChA 254nm          | 18.692 | 48187808 | 75.80  | 925777 |
| 2 | W2489 ChA 254nm          | 22.343 | 15384539 | 24.20  | 308430 |

HPLC chromatogram for dr determination of crude **5r**

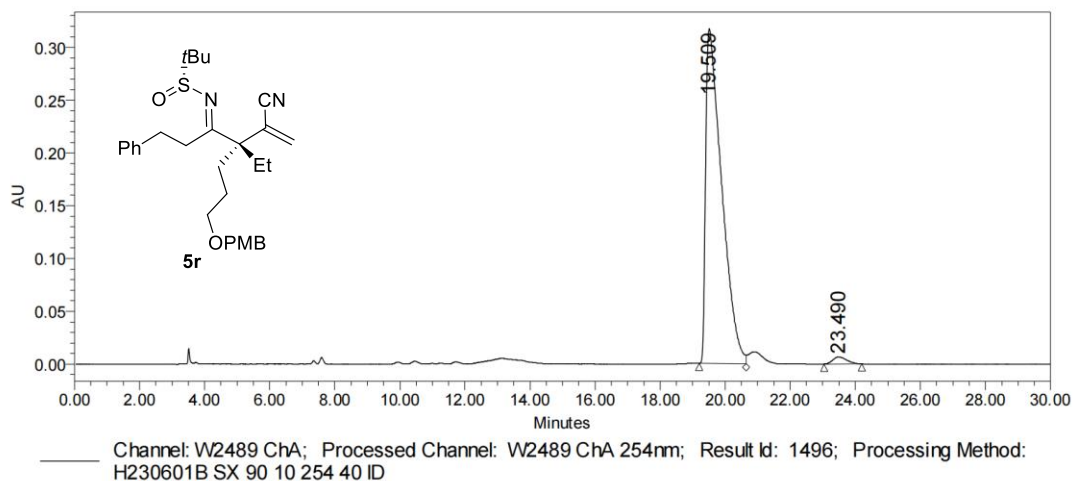

**Processed Channel Descr.: W2489 ChA 254nm**

|   | Processed Channel Descr. | RT     | Area     | % Area | Height |
|---|--------------------------|--------|----------|--------|--------|
| 1 | W2489 ChA 254nm          | 19.509 | 10825118 | 98.20  | 316809 |
| 2 | W2489 ChA 254nm          | 23.490 | 198249   | 1.80   | 6679   |

(*R*<sub>s</sub>)-**5s**: HPLC conditions: Daicel Chiralcel ID-3 column, *n*-hexane/2-propanol = 95:05 (v/v), 1.0 mL/min, 254 nm, 40 °C.

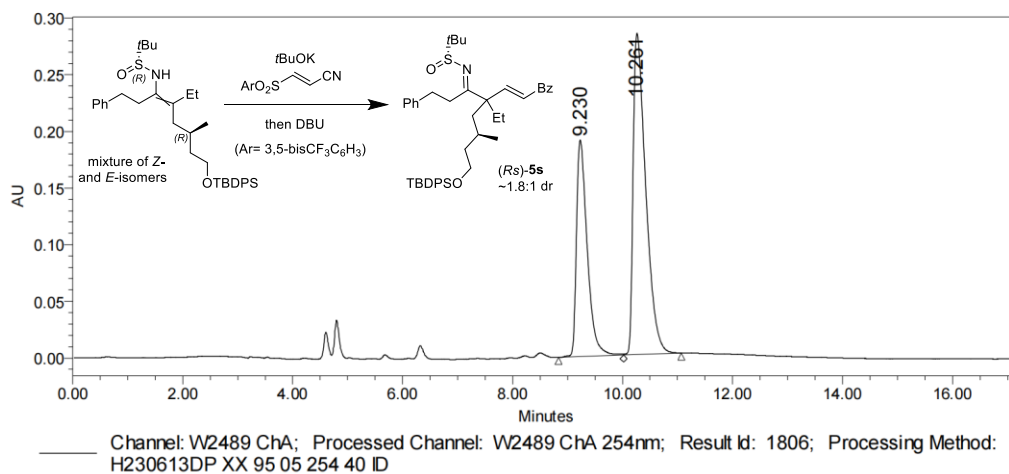

**Processed Channel Descr.: W2489 ChA 254nm**

|   | Processed Channel Descr. | RT     | Area    | % Area | Height |
|---|--------------------------|--------|---------|--------|--------|
| 1 | W2489 ChA 254nm          | 9.230  | 2605796 | 36.71  | 191229 |
| 2 | W2489 ChA 254nm          | 10.261 | 4492220 | 63.29  | 283530 |

HPLC chromatogram for dr determination of crude **5s**

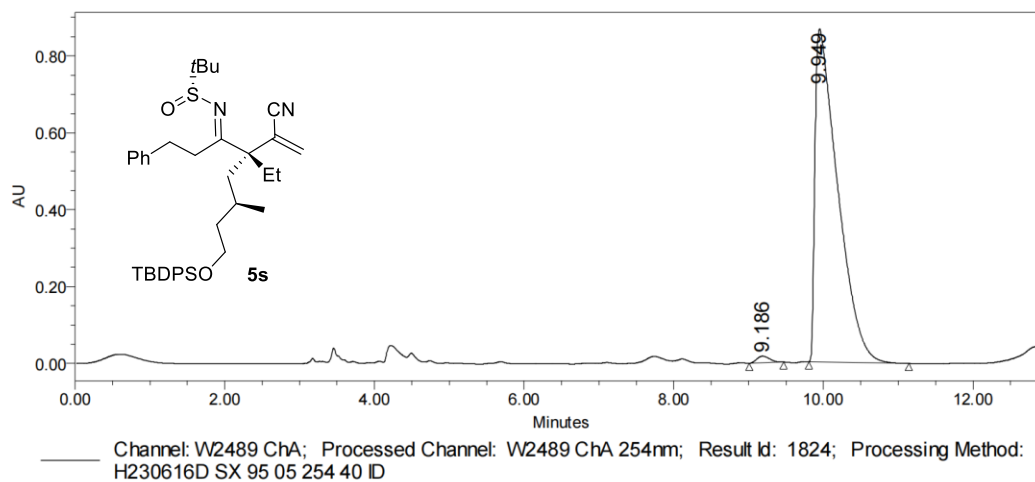

**Processed Channel Descr.: W2489 ChA 254nm**

|   | Processed Channel Descr. | RT    | Area     | % Area | Height |
|---|--------------------------|-------|----------|--------|--------|
| 1 | W2489 ChA 254nm          | 9.186 | 203648   | 1.10   | 17127  |
| 2 | W2489 ChA 254nm          | 9.949 | 18252508 | 98.90  | 865368 |

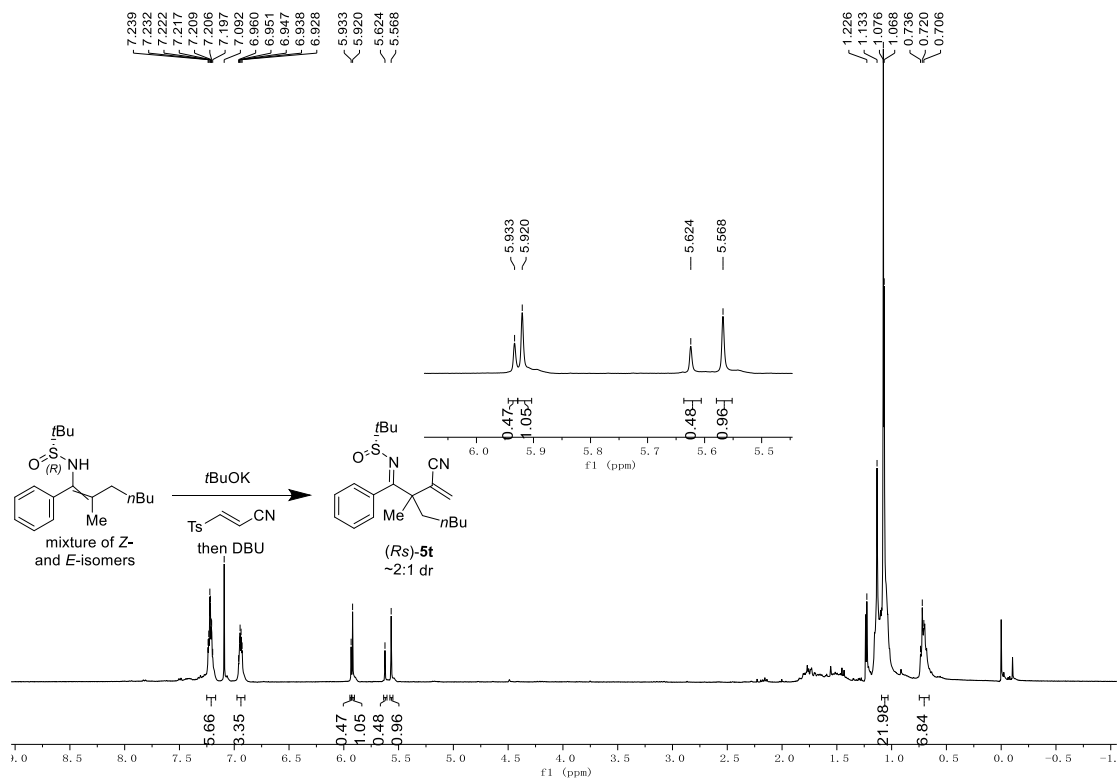

<sup>1</sup>H NMR spectrum (CDCl<sub>3</sub>, 400 MHz) of *(R\_s)*-**5t** with low diastereoselectivity (dr ~ 2:1) intentionally prepared using the corresponding enesulfonamide sample with low *Z/E* ratio

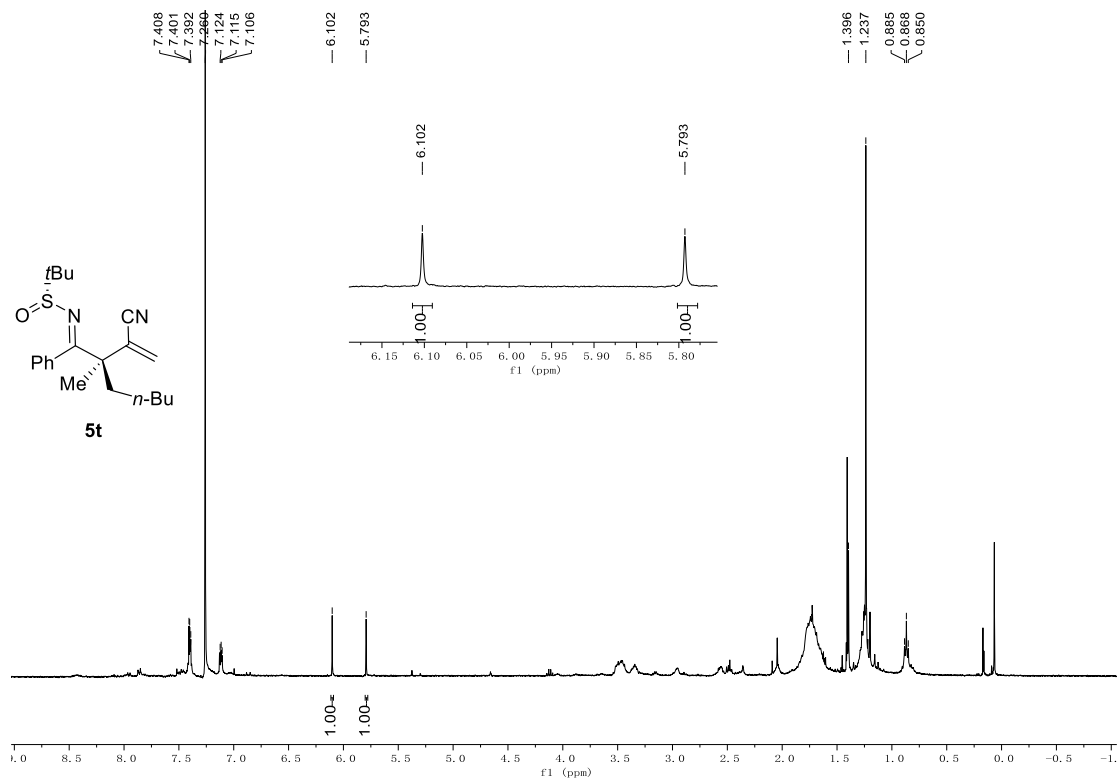

<sup>1</sup>H NMR spectrum (CDCl<sub>3</sub>, 400 MHz) of the crude reaction mixture of **5t** (dr > 20:1) (No observable presence of the minor diastereomer)

(*R*<sub>s</sub>)-**5u**: HPLC conditions: Daicel Chiralcel IG-3 column, *n*-hexane/2-propanol = 80:20 (v/v), 1.0 mL/min, 254 nm, 40 °C.

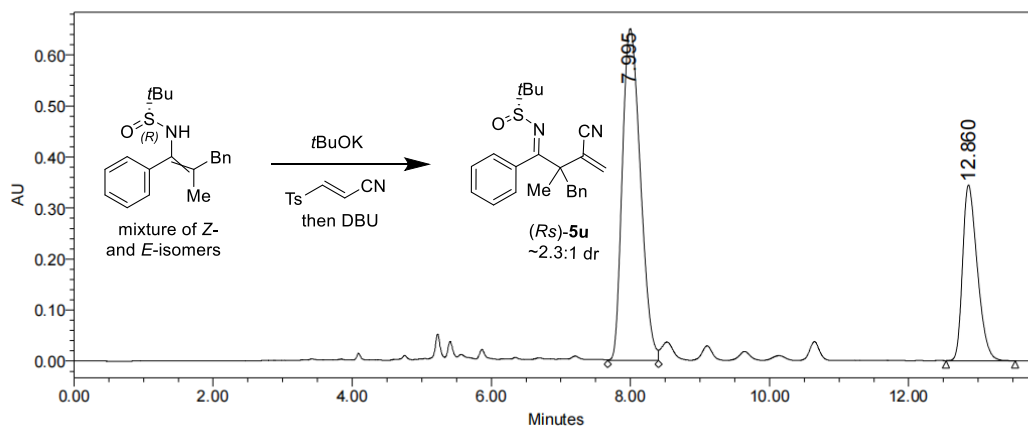

**Processed Channel Descr.: W2489 ChA 254nm**

|   | Processed Channel Descr. | RT     | Area     | % Area | Height |
|---|--------------------------|--------|----------|--------|--------|
| 1 | W2489 ChA 254nm          | 7.995  | 11714063 | 69.84  | 650327 |
| 2 | W2489 ChA 254nm          | 12.860 | 5059252  | 30.16  | 344580 |

HPLC chromatogram for dr determination of crude **5u**

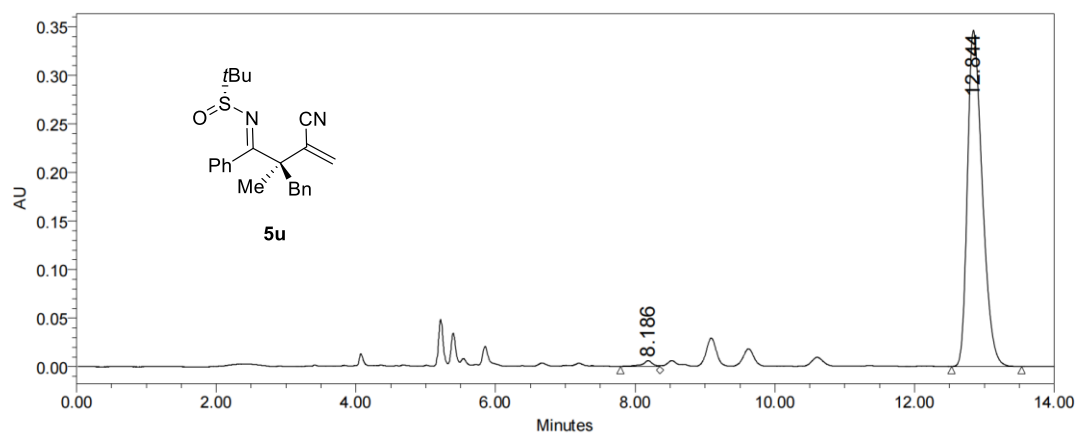

**Processed Channel Descr.: W2489 ChA 254nm**

|   | Processed Channel Descr. | RT     | Area    | % Area | Height |
|---|--------------------------|--------|---------|--------|--------|
| 1 | W2489 ChA 254nm          | 8.186  | 62358   | 1.20   | 5904   |
| 2 | W2489 ChA 254nm          | 12.844 | 5117052 | 98.80  | 346247 |

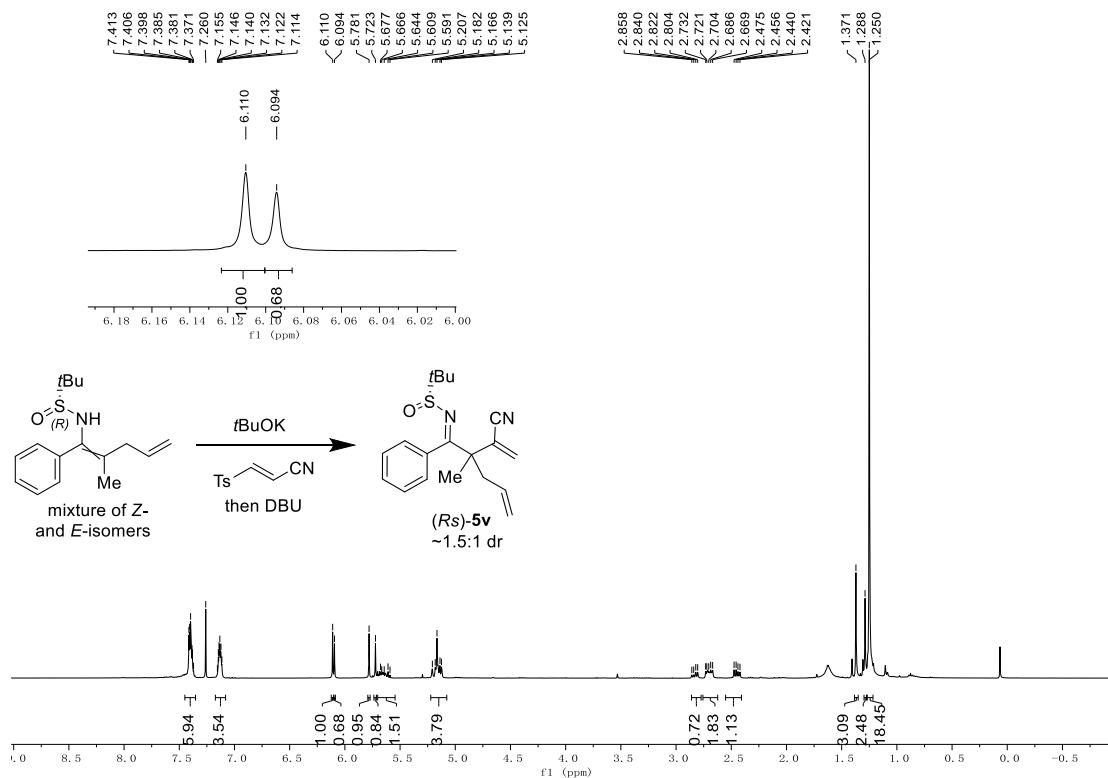

<sup>1</sup>H NMR spectrum (CDCl<sub>3</sub>, 400 MHz) of *(R<sub>s</sub>)-5v* with low diastereoselectivity (dr ~ 1.5:1) intentionally prepared using the corresponding enesulfonamide sample with low *Z/E* ratio

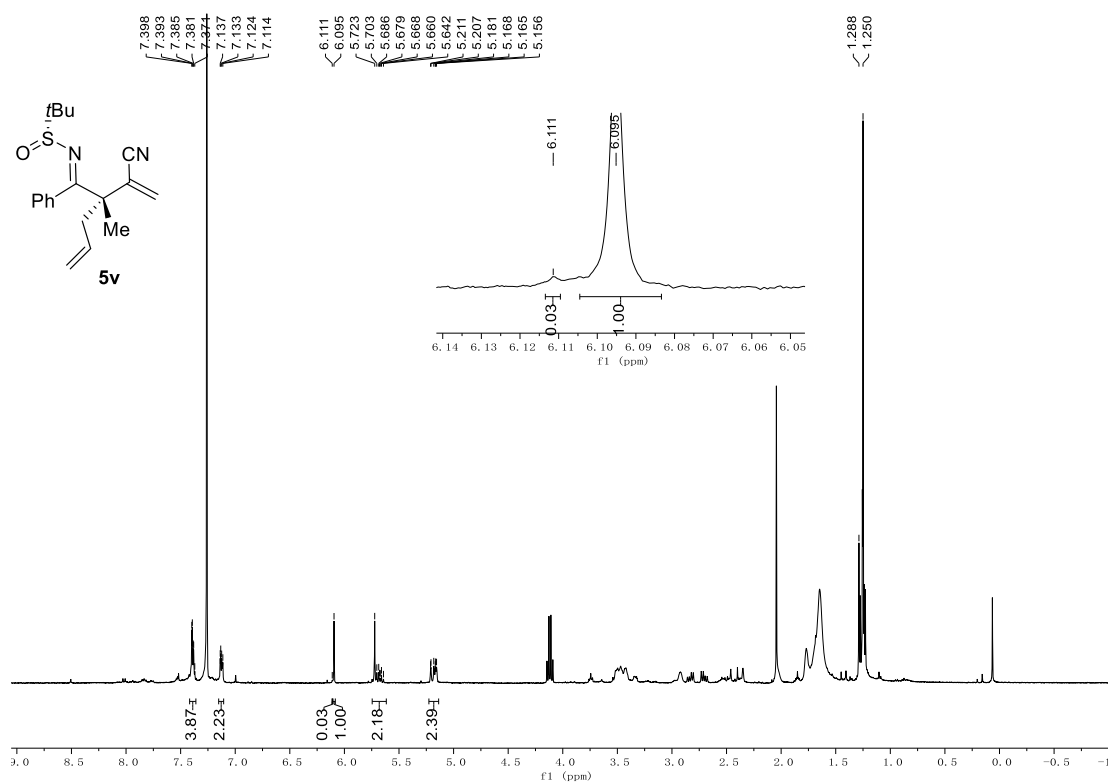

<sup>1</sup>H NMR spectrum (CDCl<sub>3</sub>, 400 MHz) of the crude reaction mixture of **5v** (dr > 20:1)

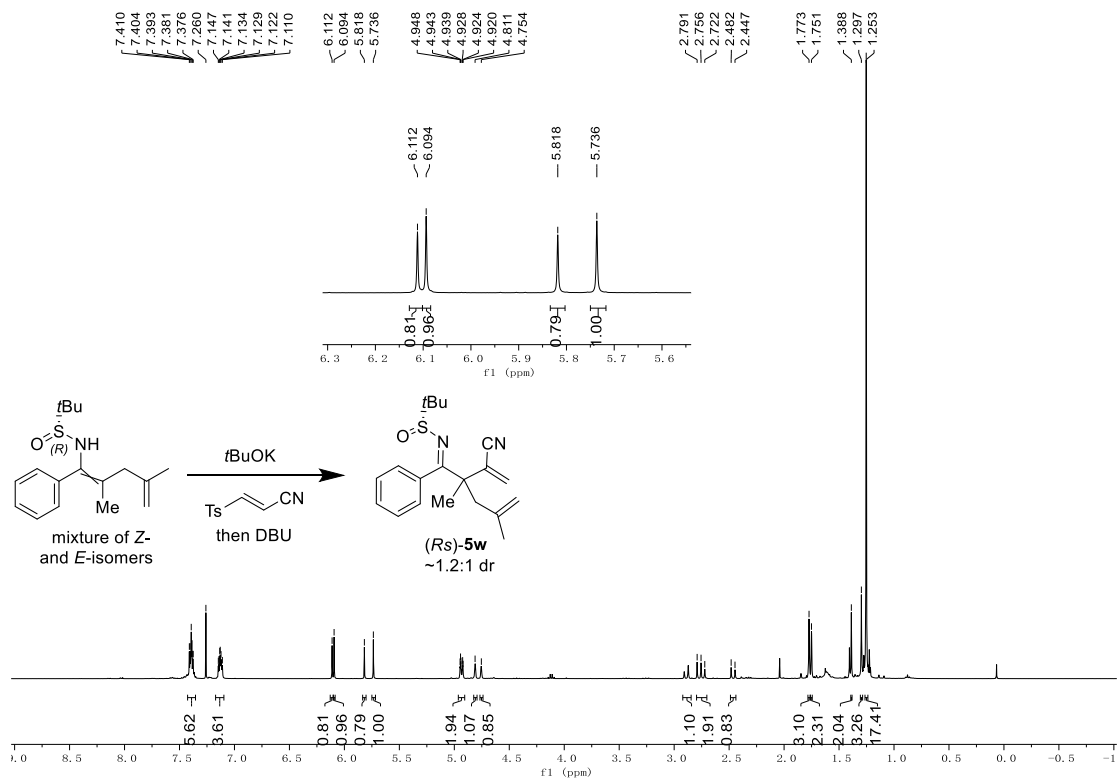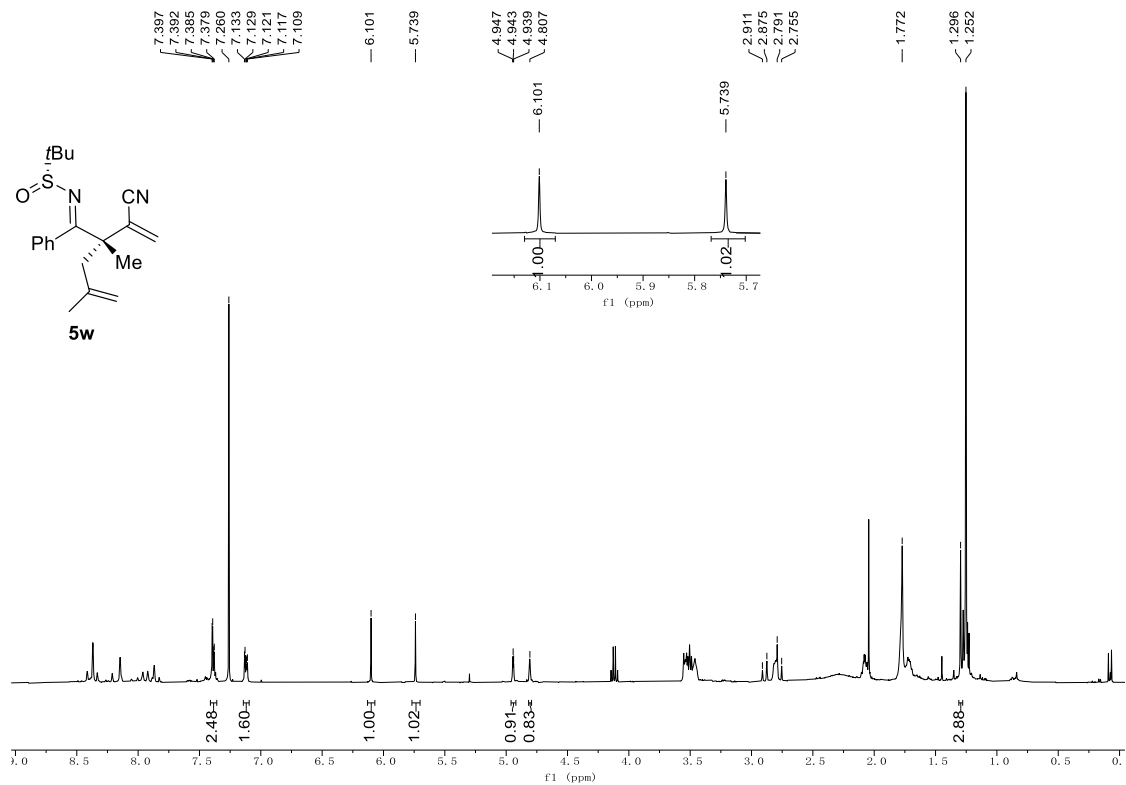



(*R*<sub>s</sub>)-**5x**: HPLC conditions: Daicel Chiralcel IC-3 column, *n*-hexane/2-propanol = 80:20 (v/v), 1.0 mL/min, 254 nm, 40 °C.

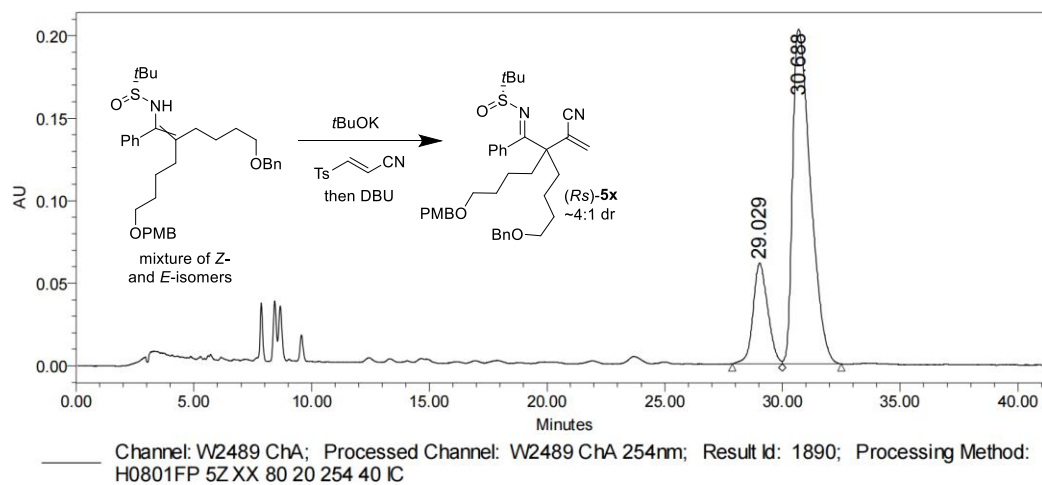

**Processed Channel Descr.: W2489 ChA 254nm**

|   | Processed Channel Descr. | RT     | Area     | % Area | Height |
|---|--------------------------|--------|----------|--------|--------|
| 1 | W2489 ChA 254nm          | 29.029 | 2644107  | 19.69  | 61055  |
| 2 | W2489 ChA 254nm          | 30.688 | 10783573 | 80.31  | 202690 |

HPLC chromatogram for dr determination of crude **5x**

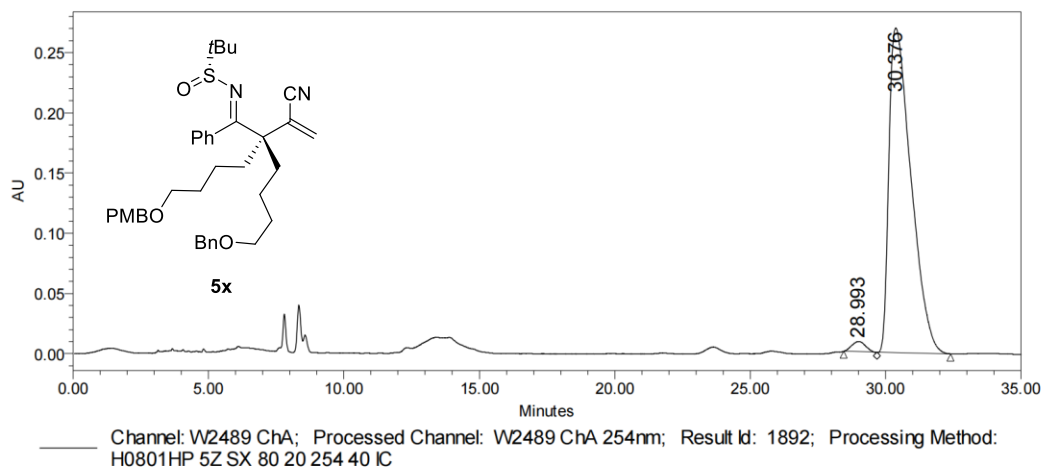

**Processed Channel Descr.: W2489 ChA 254nm**

|   | Processed Channel Descr. | RT     | Area     | % Area | Height |
|---|--------------------------|--------|----------|--------|--------|
| 1 | W2489 ChA 254nm          | 28.993 | 296685   | 1.91   | 8444   |
| 2 | W2489 ChA 254nm          | 30.376 | 15225628 | 98.09  | 269446 |

(*R*s)-**5y**: HPLC conditions: Daicel Chiralcel IG-3 column, *n*-hexane/2-propanol = 85:15 (v/v), 1.0 mL/min, 254 nm, 40 °C

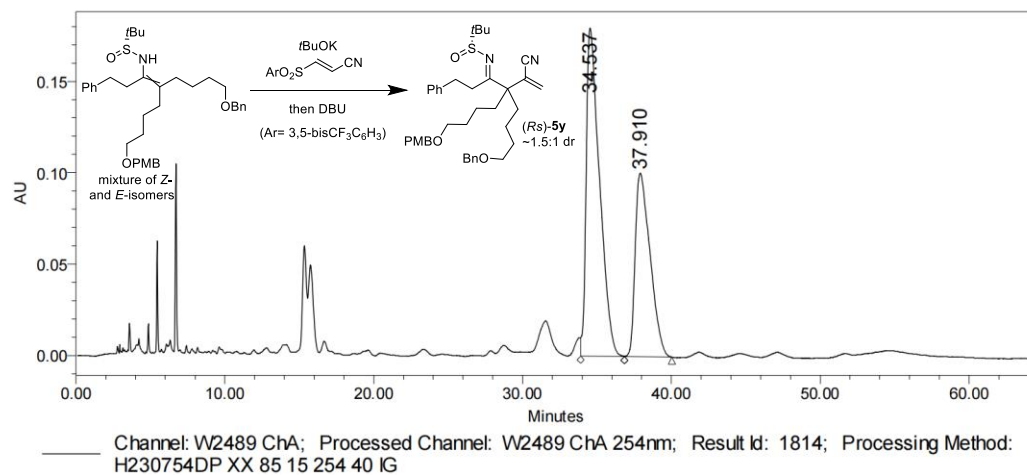

**Processed Channel Descr.: W2489 ChA 254nm**

|   | Processed Channel Descr. | RT     | Area     | % Area | Height |
|---|--------------------------|--------|----------|--------|--------|
| 1 | W2489 ChA 254nm          | 34.537 | 11172218 | 61.48  | 179531 |
| 2 | W2489 ChA 254nm          | 37.910 | 6999961  | 38.52  | 100506 |

HPLC chromatogram for dr determination of crude **5y**

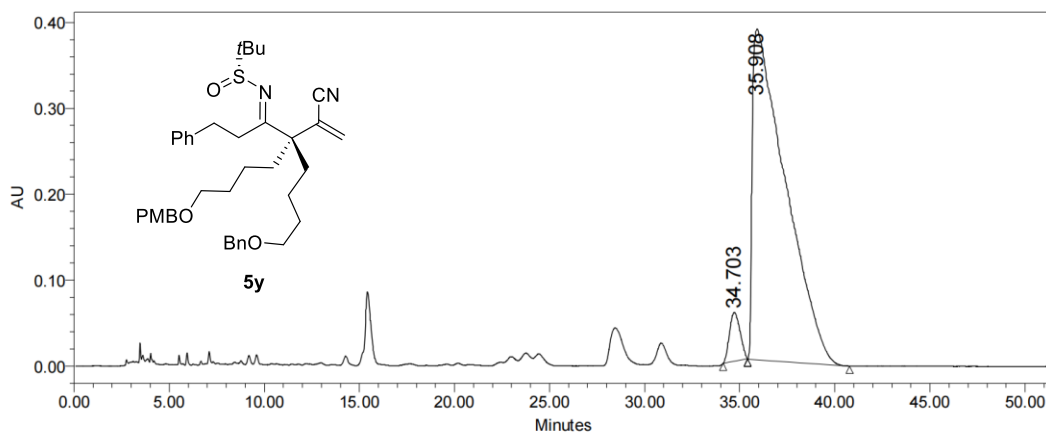

**Processed Channel Descr.: W2489 ChA 254nm**

|   | Processed Channel Descr. | RT     | Area     | % Area | Height |
|---|--------------------------|--------|----------|--------|--------|
| 1 | W2489 ChA 254nm          | 34.703 | 2207891  | 4.52   | 56966  |
| 2 | W2489 ChA 254nm          | 35.908 | 46612978 | 95.48  | 384710 |

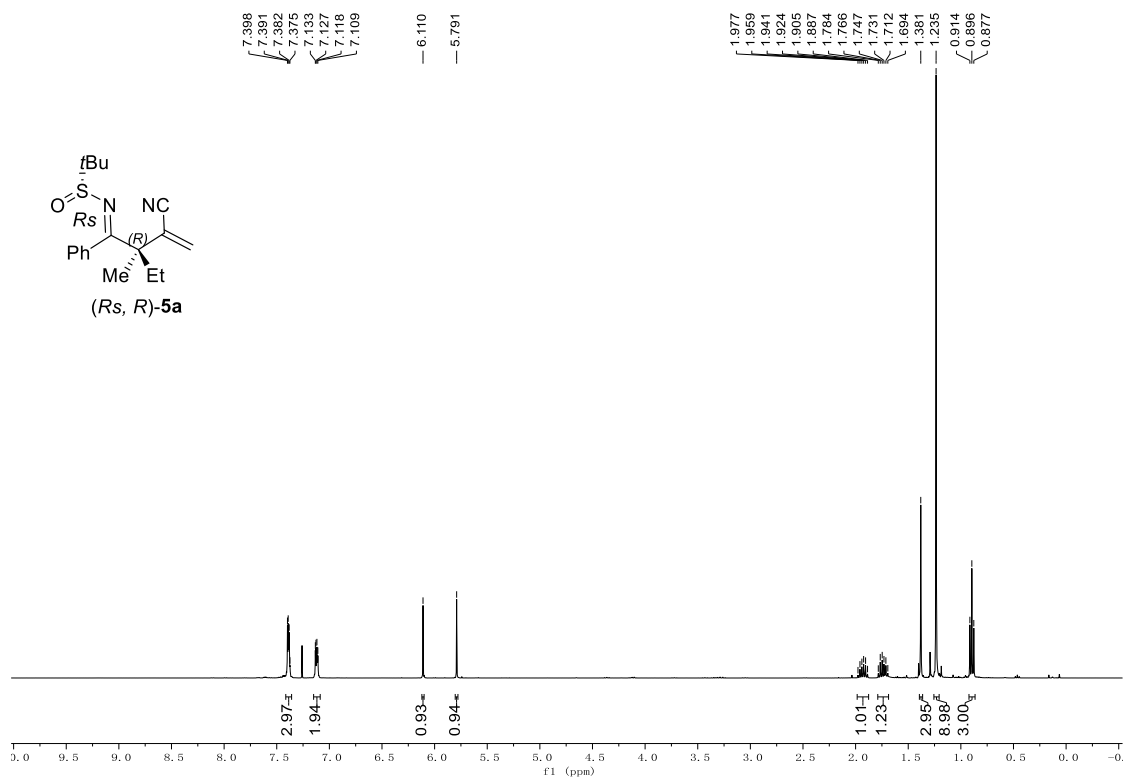

$^1\text{H}$  NMR spectrum ( $\text{CDCl}_3$ , 400 MHz) of the diastereomer (*R*, *R*)-**5a** that was used to identify the diagnostic peak(s) of the minor diastereomer

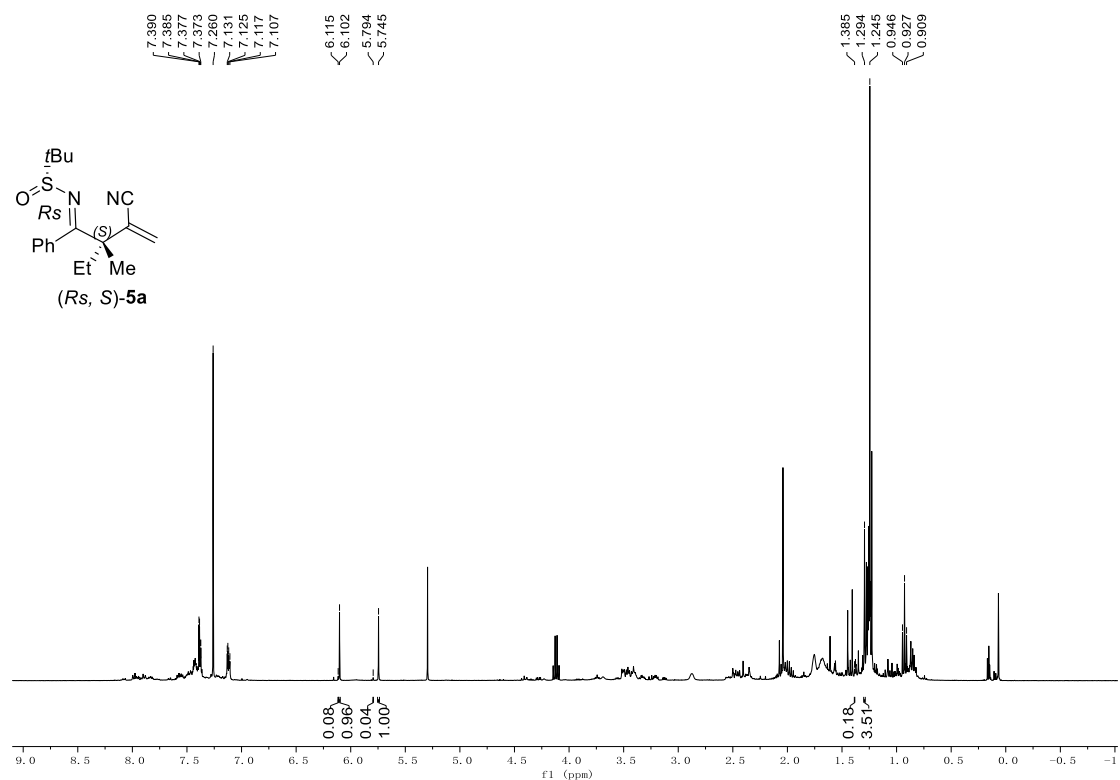

$^1\text{H}$  NMR spectrum ( $\text{CDCl}_3$ , 400 MHz) of the crude reaction mixture of (*R*, *S*)-**5a** (dr >20:1; Scheme 5)



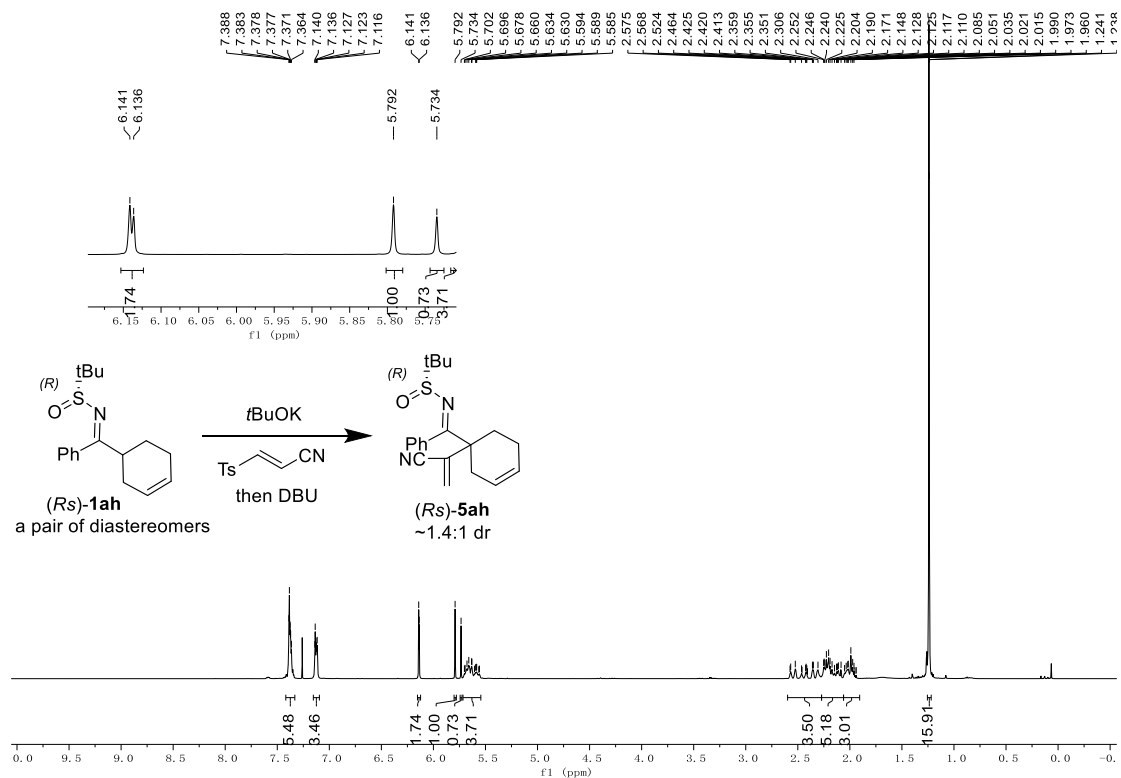

<sup>1</sup>H NMR spectrum of the purified mixture of inseparable diastereomers of (*R<sub>S</sub>*, 2*S*)-**5ah** and (*R<sub>S</sub>*, 2*R*)-**5ah** (~1.4:1 dr) (this low dr sample was intentionally prepared by using ~1:1 diastereomeric mixture of *N-t*Bs ketimine (*R<sub>S</sub>*, 2*S*)-**1ah** and (*R<sub>S</sub>*, 2*R*)-**1ah** as the starting material in order to identify the diagnostic peak(s) of the minor diastereomer by <sup>1</sup>H NMR analysis)

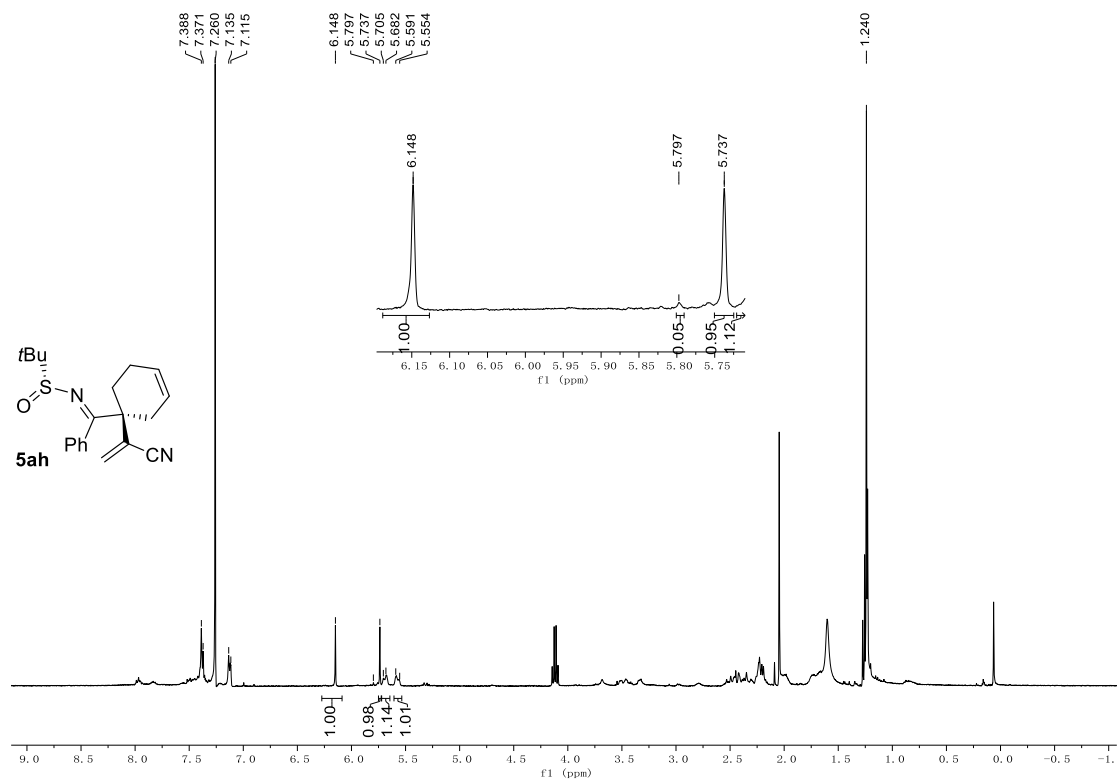

<sup>1</sup>H NMR spectrum (CDCl<sub>3</sub>, 400 MHz) of the crude reaction mixture of **5ah** (dr = 20:1)

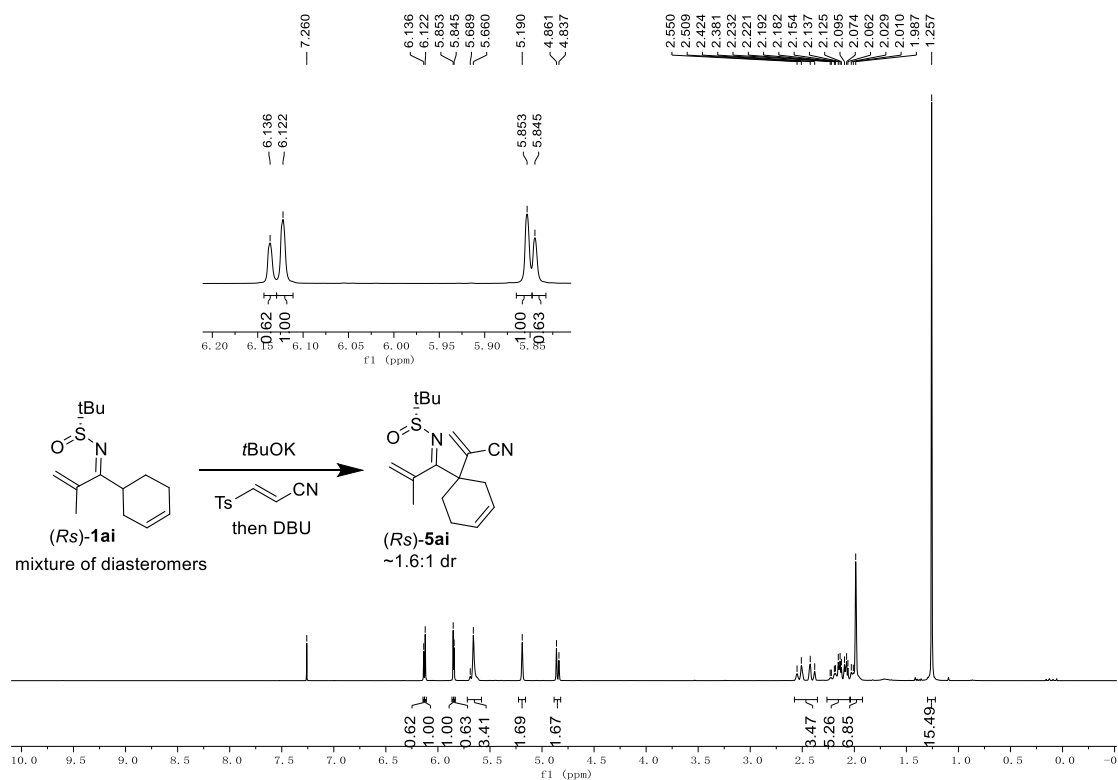

<sup>1</sup>H NMR spectrum of the purified mixture of inseparable diastereomers of *(R\_s, 2S)*-**5ai** and *(R\_s, 2R)*-**5ai** (~1.6:1 dr) (this low dr sample was intentionally prepared by using diastereomeric mixture of *N*-*t*Bs ketimine *(R\_s, 2S)*-**1ai** and *(R\_s, 2R)*-**1ai** as the starting material in order to identify the diagnostic peak(s) of the minor diastereomer by <sup>1</sup>H NMR analysis)

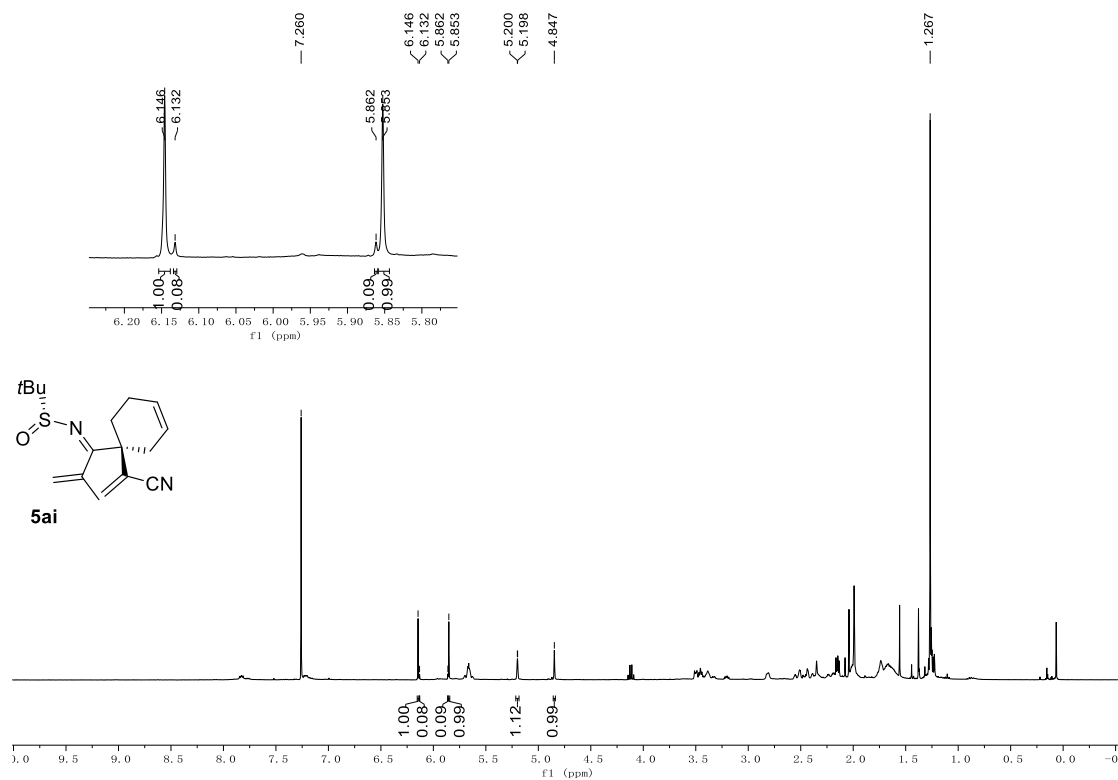

<sup>1</sup>H NMR spectrum (CDCl<sub>3</sub>, 400 MHz) of the crude reaction mixture of **5ai** (dr = 12:1)

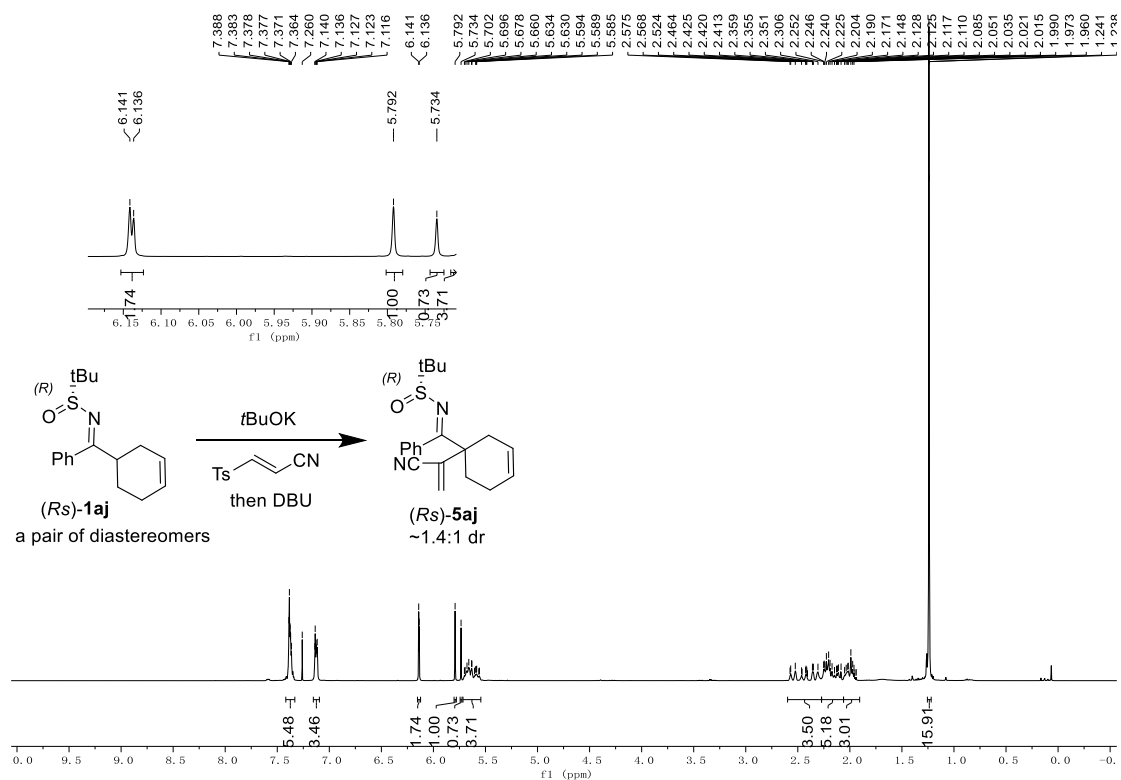

$^1\text{H NMR}$  spectrum of the purified mixture of inseparable diastereomers of  $(R_s, 2S)\text{-5aj}$  and  $(R_s, 2R)\text{-5aj}$  (~1.4:1 dr) (this low dr sample was intentionally prepared by using ~1:1 diastereomeric mixture of  $N\text{-}t\text{Bu}$  ketimine  $(R_s, 2S)\text{-1aj}$  and  $(R_s, 2R)\text{-1aj}$  as the starting material in order to identify the diagnostic peak(s) of the minor diastereomer by  $^1\text{H NMR}$  analysis; note: **5ah** and **5aj** is a pair of diastereomers, see Scheme 5)

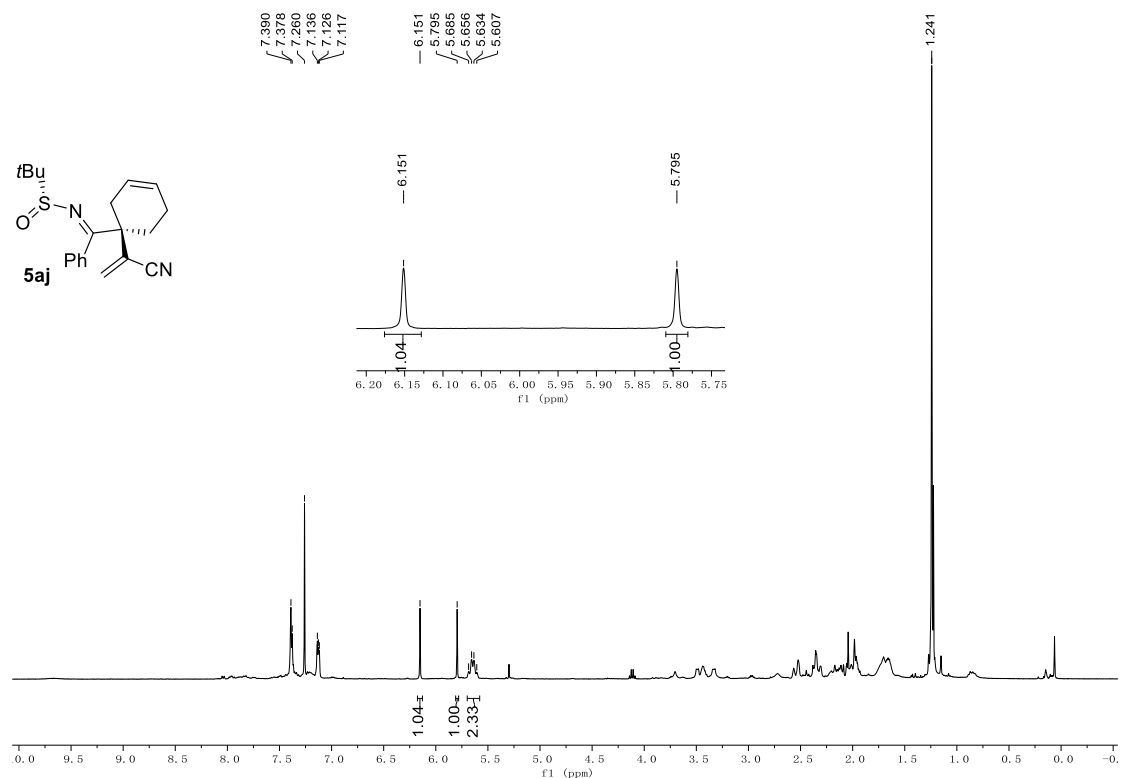

$^1\text{H NMR}$  spectrum ( $\text{CDCl}_3$ , 400 MHz) of the crude reaction mixture of **5aj** (dr > 20:1)





### X-Ray crystal structure of the compound **3z**

The crystal of compound **3z** was grown by the slow evaporation of its solution in acetone/MeOH at room temperature. X-Ray crystal structure (ORTEP) of compound **3z** with the thermal ellipsoids shown at a 50% possibility level.

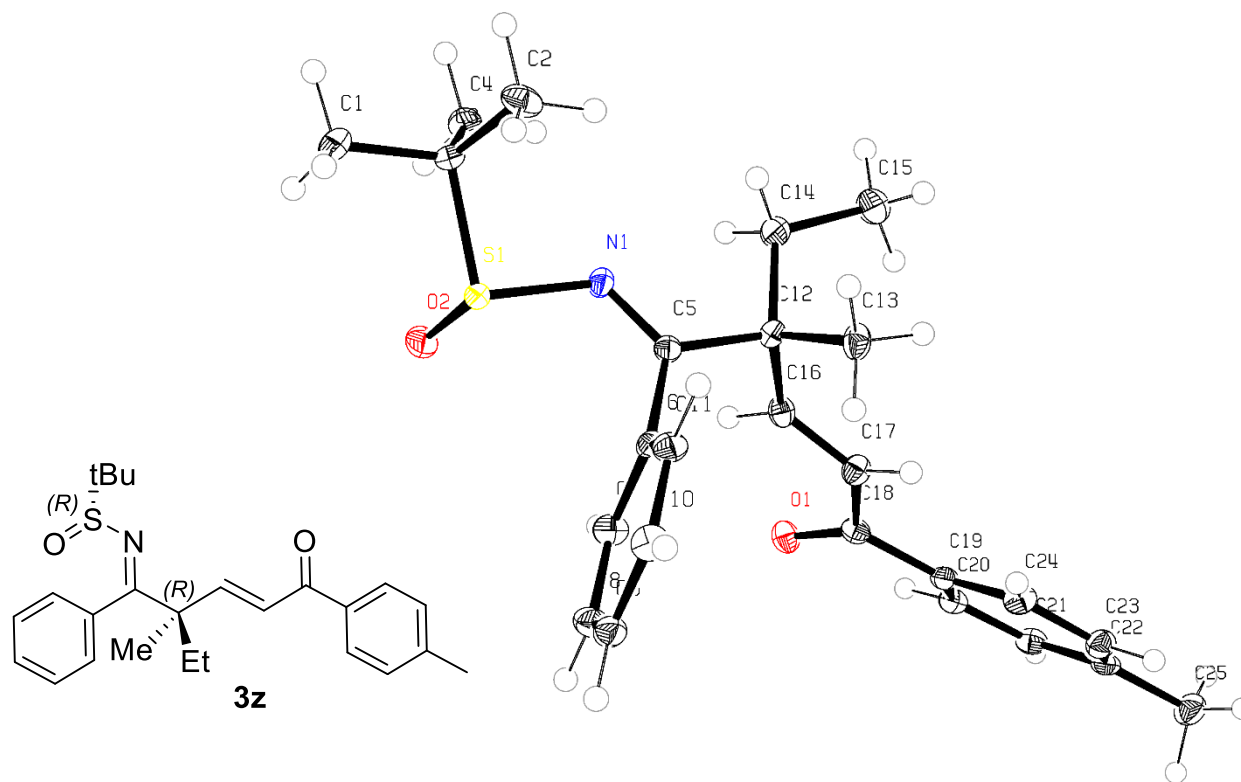

**Table S1 Crystal data and structure refinement for 3z**

|                                             |                                                               |
|---------------------------------------------|---------------------------------------------------------------|
| Identification code                         | <b>3z</b>                                                     |
| Empirical formula                           | C <sub>25</sub> H <sub>31</sub> NO <sub>2</sub> S             |
| Formula weight                              | 409.57                                                        |
| Temperature/K                               | 100.00                                                        |
| Crystal system                              | monoclinic                                                    |
| Space group                                 | P2 <sub>1</sub>                                               |
| a/Å                                         | 13.7335(11)                                                   |
| b/Å                                         | 6.0074(4)                                                     |
| c/Å                                         | 14.8867(12)                                                   |
| α/°                                         | 90                                                            |
| β/°                                         | 112.483(3)                                                    |
| γ/°                                         | 90                                                            |
| Volume/Å <sup>3</sup>                       | 1134.84(15)                                                   |
| Z                                           | 2                                                             |
| ρ <sub>calc</sub> /cm <sup>3</sup>          | 1.199                                                         |
| μ/mm <sup>-1</sup>                          | 0.163                                                         |
| F(000)                                      | 440.0                                                         |
| Crystal size/mm <sup>3</sup>                | 0.28 × 0.24 × 0.22                                            |
| Radiation                                   | MoKα (λ = 0.71073)                                            |
| 2θ range for data collection/°              | 5.132 to 56.904                                               |
| Index ranges                                | -18 ≤ h ≤ 18, -8 ≤ k ≤ 7, -19 ≤ l ≤ 19                        |
| Reflections collected                       | 5650                                                          |
| Independent reflections                     | 5650 [R <sub>int</sub> = 0.0568, R <sub>sigma</sub> = 0.0407] |
| Data/restraints/parameters                  | 5650/1/268                                                    |
| Goodness-of-fit on F <sup>2</sup>           | 1.045                                                         |
| Final R indexes [I ≥ 2σ (I)]                | R <sub>1</sub> = 0.0303, wR <sub>2</sub> = 0.0676             |
| Final R indexes [all data]                  | R <sub>1</sub> = 0.0418, wR <sub>2</sub> = 0.0704             |
| Largest diff. peak/hole / e Å <sup>-3</sup> | 0.24/-0.22                                                    |
| Flack parameter                             | 0.02(2)                                                       |

**Table S2 Bond Lengths for 3z**

| <b>Atom</b> | <b>Atom</b> | <b>Length/Å</b> | <b>Atom</b> | <b>Atom</b> | <b>Length/Å</b> |
|-------------|-------------|-----------------|-------------|-------------|-----------------|
| S1          | O2          | 1.4888(15)      | C10         | C11         | 1.394(3)        |
| S1          | N1          | 1.7366(16)      | C12         | C13         | 1.534(3)        |
| S1          | C3          | 1.8380(17)      | C12         | C14         | 1.551(3)        |
| O1          | C18         | 1.227(2)        | C12         | C16         | 1.514(3)        |
| N1          | C5          | 1.277(2)        | C14         | C15         | 1.527(3)        |
| C1          | C3          | 1.530(3)        | C16         | C17         | 1.328(3)        |
| C2          | C3          | 1.528(3)        | C17         | C18         | 1.493(3)        |
| C3          | C4          | 1.522(3)        | C18         | C19         | 1.491(3)        |
| C5          | C6          | 1.502(2)        | C19         | C20         | 1.403(3)        |
| C5          | C12         | 1.544(2)        | C19         | C24         | 1.396(3)        |
| C6          | C7          | 1.395(3)        | C20         | C21         | 1.385(3)        |
| C6          | C11         | 1.396(3)        | C21         | C22         | 1.396(3)        |
| C7          | C8          | 1.394(3)        | C22         | C23         | 1.388(3)        |
| C8          | C9          | 1.388(3)        | C22         | C25         | 1.510(3)        |
| C9          | C10         | 1.388(3)        | C23         | C24         | 1.393(3)        |

**Table S3 Bond Angles for 3z**

| <b>Atom</b> | <b>Atom</b> | <b>Atom</b> | <b>Angle/°</b> | <b>Atom</b> | <b>Atom</b> | <b>Atom</b> | <b>Angle/°</b> |
|-------------|-------------|-------------|----------------|-------------|-------------|-------------|----------------|
| O(2)        | S(1)        | N(1)        | 105.36(8)      | C(13)       | C(12)       | C(5)        | 109.41(15)     |
| O(2)        | S(1)        | C(3)        | 106.41(8)      | C(13)       | C(12)       | C(14)       | 110.65(16)     |
| N(1)        | S(1)        | C(3)        | 93.89(8)       | C(16)       | C(12)       | C(5)        | 106.95(14)     |
| C(5)        | N(1)        | S(1)        | 118.22(13)     | C(16)       | C(12)       | C(13)       | 112.45(15)     |
| C(1)        | C(3)        | S(1)        | 105.19(12)     | C(16)       | C(12)       | C(14)       | 107.91(16)     |
| C(2)        | C(3)        | S(1)        | 107.39(12)     | C(15)       | C(14)       | C(12)       | 114.81(16)     |
| C(2)        | C(3)        | C(1)        | 110.58(16)     | C(17)       | C(16)       | C(12)       | 127.17(17)     |
| C(4)        | C(3)        | S(1)        | 109.72(12)     | C(16)       | C(17)       | C(18)       | 120.41(17)     |
| C(4)        | C(3)        | C(1)        | 110.87(16)     | O(1)        | C(18)       | C(17)       | 121.02(18)     |
| C(4)        | C(3)        | C(2)        | 112.75(16)     | O(1)        | C(18)       | C(19)       | 120.76(17)     |
| N(1)        | C(5)        | C(6)        | 125.17(16)     | C(19)       | C(18)       | C(17)       | 118.17(16)     |
| N(1)        | C(5)        | C(12)       | 116.46(16)     | C(20)       | C(19)       | C(18)       | 118.18(16)     |
| C(6)        | C(5)        | C(12)       | 118.31(14)     | C(24)       | C(19)       | C(18)       | 122.98(17)     |
| C(7)        | C(6)        | C(5)        | 119.33(16)     | C(24)       | C(19)       | C(20)       | 118.83(17)     |
| C(7)        | C(6)        | C(11)       | 119.68(17)     | C(21)       | C(20)       | C(19)       | 120.28(17)     |
| C(11)       | C(6)        | C(5)        | 120.98(16)     | C(20)       | C(21)       | C(22)       | 121.09(18)     |
| C(8)        | C(7)        | C(6)        | 120.31(17)     | C(21)       | C(22)       | C(25)       | 120.66(17)     |
| C(9)        | C(8)        | C(7)        | 119.95(17)     | C(23)       | C(22)       | C(21)       | 118.40(17)     |
| C(8)        | C(9)        | C(10)       | 119.85(17)     | C(23)       | C(22)       | C(25)       | 120.93(17)     |
| C(9)        | C(10)       | C(11)       | 120.66(17)     | C(22)       | C(23)       | C(24)       | 121.23(18)     |
| C(10)       | C(11)       | C(6)        | 119.55(17)     | C(23)       | C(24)       | C(19)       | 120.13(18)     |
| C(5)        | C(12)       | C(14)       | 109.36(14)     |             |             |             |                |

### X-Ray crystal structure of the compound (*R*<sub>s</sub>, *S*)-5a

The crystal of (*R*<sub>s</sub>, *S*)-5a was grown by the slow evaporation of its solution in dichloromethane/petroleum ether at room temperature. X-Ray crystal structure (ORTEP) of compound (*R*<sub>s</sub>, *S*)-5a with the thermal ellipsoids shown at a 50% possibility level.

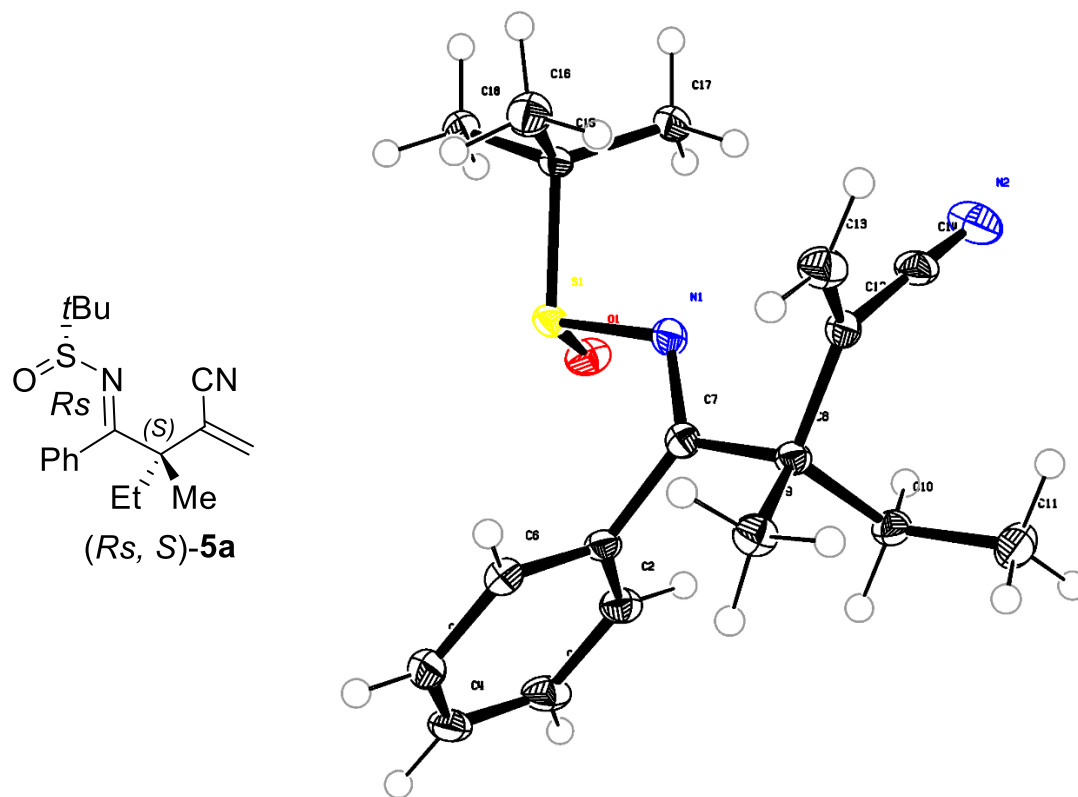

**Table S4 Crystal data and structure refinement for (R<sub>s</sub>, S)-5a**

|                                             |                                                               |
|---------------------------------------------|---------------------------------------------------------------|
| Identification code                         | (R <sub>s</sub> , S)-5a                                       |
| Empirical formula                           | C <sub>18</sub> H <sub>24</sub> N <sub>2</sub> OS             |
| Formula weight                              | 316.45                                                        |
| Temperature/K                               | 100.00                                                        |
| Crystal system                              | orthorhombic                                                  |
| Space group                                 | P2 <sub>1</sub> 2 <sub>1</sub> 2 <sub>1</sub>                 |
| a/Å                                         | 10.0440(6)                                                    |
| b/Å                                         | 15.6224(10)                                                   |
| c/Å                                         | 21.9085(14)                                                   |
| α/°                                         | 90                                                            |
| β/°                                         | 90                                                            |
| γ/°                                         | 90                                                            |
| Volume/Å <sup>3</sup>                       | 3437.7(4)                                                     |
| Z                                           | 8                                                             |
| ρ <sub>calc</sub> /cm <sup>3</sup>          | 1.223                                                         |
| μ/mm <sup>-1</sup>                          | 0.192                                                         |
| F(000)                                      | 1360.0                                                        |
| Crystal size/mm <sup>3</sup>                | 0.25 × 0.23 × 0.2                                             |
| Radiation                                   | MoKα (λ = 0.71073)                                            |
| 2θ range for data collection/°              | 4.462 to 56.642                                               |
| Index ranges                                | -13 ≤ h ≤ 13, -20 ≤ k ≤ 20, -28 ≤ l ≤ 29                      |
| Reflections collected                       | 46595                                                         |
| Independent reflections                     | 8541 [R <sub>int</sub> = 0.0586, R <sub>sigma</sub> = 0.0419] |
| Data/restraints/parameters                  | 8541/0/407                                                    |
| Goodness-of-fit on F <sup>2</sup>           | 1.033                                                         |
| Final R indexes [I ≥ 2σ (I)]                | R <sub>1</sub> = 0.0339, wR <sub>2</sub> = 0.0707             |
| Final R indexes [all data]                  | R <sub>1</sub> = 0.0433, wR <sub>2</sub> = 0.0752             |
| Largest diff. peak/hole / e Å <sup>-3</sup> | 0.22/-0.23                                                    |
| Flack parameter                             | -0.02(2)                                                      |

**Table S5 Bond Lengths for (*R*<sub>s</sub>, *S*)-5a**

| <b>Atom</b> | <b>Atom</b> | <b>Length/Å</b> | <b>Atom</b> | <b>Atom</b> | <b>Length/Å</b> |
|-------------|-------------|-----------------|-------------|-------------|-----------------|
| S1          | O1          | 1.4859(16)      | S2          | O2          | 1.4884(17)      |
| S1          | N1          | 1.7355(18)      | S2          | N3          | 1.7347(18)      |
| S1          | C15         | 1.838(2)        | S2          | C33         | 1.840(2)        |
| N1          | C7          | 1.278(3)        | N3          | C25         | 1.279(3)        |
| N2          | C14         | 1.149(3)        | N4          | C32         | 1.148(3)        |
| C1          | C2          | 1.391(3)        | C19         | C20         | 1.391(3)        |
| C1          | C6          | 1.399(3)        | C19         | C24         | 1.401(3)        |
| C1          | C7          | 1.505(3)        | C19         | C25         | 1.504(3)        |
| C2          | C3          | 1.393(3)        | C20         | C21         | 1.391(3)        |
| C3          | C4          | 1.381(3)        | C21         | C22         | 1.380(3)        |
| C4          | C5          | 1.387(3)        | C22         | C23         | 1.384(3)        |
| C5          | C6          | 1.387(3)        | C23         | C24         | 1.389(3)        |
| C7          | C8          | 1.533(3)        | C25         | C26         | 1.538(3)        |
| C8          | C9          | 1.534(3)        | C26         | C27         | 1.533(3)        |
| C8          | C10         | 1.551(3)        | C26         | C28         | 1.556(3)        |
| C8          | C12         | 1.532(3)        | C26         | C30         | 1.531(3)        |
| C10         | C11         | 1.528(3)        | C28         | C29         | 1.527(3)        |
| C12         | C13         | 1.327(3)        | C30         | C31         | 1.327(3)        |
| C12         | C14         | 1.446(3)        | C30         | C32         | 1.446(3)        |
| C15         | C16         | 1.522(3)        | C33         | C34         | 1.528(3)        |
| C15         | C17         | 1.527(3)        | C33         | C35         | 1.523(3)        |
| C15         | C18         | 1.528(3)        | C33         | C36         | 1.529(3)        |

Table S6 Bond Angles for (*R*<sub>s</sub>, *S*)-5a

| Atom | Atom | Atom | Angle/°    | Atom | Atom | Atom | Angle/°    |
|------|------|------|------------|------|------|------|------------|
| O1   | S1   | N1   | 108.38(9)  | O2   | S2   | N3   | 106.12(10) |
| O1   | S1   | C15  | 106.86(10) | O2   | S2   | C33  | 107.11(10) |
| N1   | S1   | C15  | 94.15(9)   | N3   | S2   | C33  | 95.03(9)   |
| C7   | N1   | S1   | 116.72(14) | C25  | N3   | S2   | 116.75(15) |
| C2   | C1   | C6   | 119.70(19) | C20  | C19  | C24  | 118.90(19) |
| C2   | C1   | C7   | 120.18(18) | C20  | C19  | C25  | 121.16(18) |
| C6   | C1   | C7   | 120.03(18) | C24  | C19  | C25  | 119.95(18) |
| C1   | C2   | C3   | 120.0(2)   | C21  | C20  | C19  | 120.2(2)   |
| C4   | C3   | C2   | 120.2(2)   | C22  | C21  | C20  | 120.5(2)   |
| C3   | C4   | C5   | 119.9(2)   | C21  | C22  | C23  | 119.9(2)   |
| C6   | C5   | C4   | 120.6(2)   | C22  | C23  | C24  | 120.0(2)   |
| C5   | C6   | C1   | 119.6(2)   | C23  | C24  | C19  | 120.4(2)   |
| N1   | C7   | C1   | 123.89(19) | N3   | C25  | C19  | 125.04(19) |
| N1   | C7   | C8   | 117.10(17) | N3   | C25  | C26  | 116.66(18) |
| C1   | C7   | C8   | 118.99(18) | C19  | C25  | C26  | 118.29(17) |
| C7   | C8   | C9   | 110.17(17) | C25  | C26  | C28  | 107.91(17) |
| C7   | C8   | C10  | 108.32(16) | C27  | C26  | C25  | 110.27(17) |
| C9   | C8   | C10  | 110.05(17) | C27  | C26  | C28  | 109.98(18) |
| C12  | C8   | C7   | 108.57(17) | C30  | C26  | C25  | 108.48(17) |
| C12  | C8   | C9   | 109.95(17) | C30  | C26  | C27  | 110.97(18) |
| C12  | C8   | C10  | 109.74(17) | C30  | C26  | C28  | 109.16(17) |
| C11  | C10  | C8   | 113.32(18) | C29  | C28  | C26  | 114.25(19) |
| C13  | C12  | C8   | 124.84(19) | C31  | C30  | C26  | 126.1(2)   |
| C13  | C12  | C14  | 117.7(2)   | C31  | C30  | C32  | 117.3(2)   |
| C14  | C12  | C8   | 117.44(18) | C32  | C30  | C26  | 116.59(18) |
| N2   | C14  | C12  | 178.0(3)   | N4   | C32  | C30  | 177.1(2)   |
| C16  | C15  | S1   | 107.69(15) | C34  | C33  | S2   | 104.17(14) |
| C16  | C15  | C17  | 112.67(18) | C34  | C33  | C36  | 110.50(18) |
| C16  | C15  | C18  | 110.99(19) | C35  | C33  | S2   | 110.21(15) |
| C17  | C15  | S1   | 109.66(15) | C35  | C33  | C34  | 111.57(18) |
| C17  | C15  | C18  | 110.96(18) | C35  | C33  | C36  | 112.54(18) |
| C18  | C15  | S1   | 104.49(14) | C36  | C33  | S2   | 107.44(15) |
